# Supplementary material for: Genetic code expansion, click chemistry, and light-activated PI3K reveal details of membrane protein trafficking downstream of receptor tyrosine kinases
Source: eLife. 2024 Aug 20;12:RP91012. doi: 10.7554/eLife.91012 (PMC11335347; doi:10.7554/eLife.91012)
Supplement: Figure 1—figure supplement 1—source data 2. [file elife-91012-fig1-figsupp1-data2.xlsx]

## Sheet: 4-8-15slip5series11
	Time (sec)	membr	cyto	normM	normC	Rm/c
1	0	451.209	624.475	1	1	0.722541	750
2	5.22	452.85	596.906	1.00364	0.955853	0.758662	750
3	10.44	434.958	532.011	0.963983	0.851933	0.817573	750
4	15.66	387.533	324.848	0.858877	0.520194	1.19297	650
5	20.88	382.933	266.039	0.848682	0.42602	1.43939	650
6	26.1	353.997	273.273	0.784552	0.437604	1.2954	650
7	31.32	348.983	359.768	0.77344	0.576113	0.970022	750
8	36.54	336.762	401.437	0.746355	0.642839	0.838891	750
9	41.76	343.854	396.912	0.762073	0.635593	0.866323	750
10	46.98	306.017	252.621	0.678216	0.404533	1.21137	650
11	52.2	314.615	213.8	0.697271	0.342368	1.47154	650
12	57.42	311.067	199.815	0.689408	0.319973	1.55678	650
13	62.64	299.61	287.102	0.664016	0.459749	1.04357	750
14	67.86	292.452	333.342	0.648152	0.533796	0.877333	750
15	73.08	304.443	356.094	0.674727	0.570229	0.854951	750
16	78.3	311.523	344.136	0.690418	0.551081	0.905232	750
17	83.52	285.794	214.332	0.633396	0.34322	1.33342	650
18	88.74	272.712	191.148	0.604403	0.306094	1.42671	650
19	93.96	289.613	174.316	0.64186	0.27914	1.66143	650
20	99.18	271.412	166.261	0.601522	0.266241	1.63245	650
21	104.4	260.274	239.152	0.576837	0.382965	1.08832	750
22	109.62	281.975	289.729	0.624932	0.463956	0.973237	750
23	114.84	268.774	317.447	0.595675	0.508342	0.846674	750
24	120.06	276.159	328.873	0.612042	0.526639	0.839713	750
25	125.28	278.438	337.008	0.617093	0.539666	0.826206	750
26	130.5	259.07	281.84	0.574169	0.451323	0.919209	750
27	135.72	260.794	187.791	0.577989	0.300718	1.38875	650
28	140.94	241.81	166.889	0.535916	0.267247	1.44893	650
29	146.16	247.203	153.715	0.547868	0.246151	1.60819	650
30	151.38	249.986	165.799	0.554036	0.265501	1.50777	650
31	156.6	227.54	225.913	0.50429	0.361765	1.0072	750
32	161.82	225.515	259.92	0.499802	0.416222	0.867632	750
33	167.04	228.063	279.959	0.505449	0.448311	0.81463	750
34	172.26	213.862	292.402	0.473975	0.468237	0.731397	750
35	177.48	205.3	291.43	0.455	0.46668	0.704457	750
