# Supplementary material for: Genetic code expansion, click chemistry, and light-activated PI3K reveal details of membrane protein trafficking downstream of receptor tyrosine kinases
Source: eLife. 2024 Aug 20;12:RP91012. doi: 10.7554/eLife.91012 (PMC11335347; doi:10.7554/eLife.91012)
Supplement: Figure 1—figure supplement 2—source data 1. [file elife-91012-fig1-figsupp2-data1.xlsx]

## Sheet: Sheet1
															Scatter Plot
GRP-PH (440 nm)			Background												Average (2.5-3 min, 7.5-8 min, 12.5-13 min)
Time	Cell 1_1	Cell 1_2	Cell 2_1	Cell 4-1	Cell 4-2	Cell 4-3	Cell 5_1	Cell 5_2	Cell 5_3		Mean	SD	Number	SEM	Cell 1_1	Cell 1_2	Cell 2_1	Cell 4-1	Cell 4-2	Cell 4-3	Cell 5_1	Cell 5_2	Cell 5_3
0	0.987083	0.976503	1.004	0.996623	0.968723	0.95604	1.00756	1.00491	1.01099		0.99027	0.0193879	9	0.00685465
0.166667	0.979127	0.982079	1.0302	0.954013	0.938605	0.949815	1.01309	0.990905	0.978226		0.979562	0.0296657	9	0.0104884
0.333333	0.985159	0.988322	0.985525	0.984985	0.96907	0.973095	1.03097	1.0067	1.00109		0.991657	0.0188778	9	0.00667431
0.5	0.998302	0.978241	0.977193	0.975657	0.971302	0.97224	1.00488	0.988339	1.00898		0.986126	0.0145401	9	0.0051407
0.666667	0.997507	0.980874	0.977511	0.965565	0.95927	0.996825	0.966661	0.987064	0.984532		0.979534	0.0136063	9	0.00481056
0.833333	1.00139	0.992154	1.00718	0.973783	0.959202	1.00587	0.970714	0.969233	0.983375		0.984767	0.0176547	9	0.00624189
1	0.998886	1.00023	1.00981	0.952558	0.988926	0.9689	0.981213	0.976707	0.973686		0.983435	0.0178763	9	0.00632023
1.16667	1.00911	1.00484	1.01145	1.01051	1.00478	1.0072	0.970792	0.983226	0.999148		1.00012	0.0139541	9	0.00493353
1.33333	0.987316	0.994783	1.00526	0.989923	0.992277	1.00811	0.964259	0.99182	0.989604		0.991484	0.0124618	9	0.00440591
1.5	0.979867	0.992362	0.999064	1.00908	1.02179	1.02415	0.978022	0.980943	0.980799		0.996231	0.0183441	9	0.00648561
1.66667	0.996896	1.00291	0.998564	0.985924	0.991798	1.0199	0.989035	1.00258	1.01095		0.99984	0.0107711	9	0.00380817
1.83333	0.996924	1.00642	0.979252	1.00162	1.01693	1.02084	0.967956	0.990127	0.984358		0.996047	0.0174394	9	0.00616578
2	1.00852	1.02878	0.991969	1.03057	1.03862	1.04515	0.991364	0.981184	0.995683		1.01243	0.0236838	9	0.0083735
2.16667	1.00044	1.02059	1.02369	1.04944	1.04498	1.03168	1.02175	1.02577	0.996371		1.02386	0.0176228	9	0.0062306
2.33333	1.01379	1.02401	0.994178	1.01094	1.02973	0.999375	1.01506	1.04055	1.02727		1.01721	0.0148035	9	0.00523382
2.5	1.01899	0.99835	1.00341	1.05855	1.03092	1.06823	1.04038	1.04002	1.02568		1.03161	0.0232131	9	0.00820709
2.66667	1.02816	1.01599	1.01546	1.03012	1.03122	0.98732	1.03524	1.04325	1.03358		1.02448	0.0164924	9	0.00583093	1.01477	1.02425	1.00582	1.03859	1.04575	1.01487	1.05199	1.04482	1.02881
2.83333	1.01283	1.02857	0.9908	1.03547	1.05501	1.0219	1.05755	1.04161	1.02453		1.02981	0.0208504	9	0.00737172
3	1.00331	1.02819	1.0112	1.05019	1.05103	1.0354	1.06318	1.0496	1.02833		1.0356	0.0198539	9	0.00701941
3.16667	1.01312	1.03105	0.992611	1.0485	1.04767	0.984545	1.06135	1.02467	1.03436		1.02643	0.0257881	9	0.00911745
3.33333	1.05251	1.06724	1.02022	1.06706	1.07393	1.0152	1.05962	1.06078	1.04484		1.05127	0.0208747	9	0.00738033
3.5	1.02007	1.04488	1.03003	1.09907	1.1362	1.0808	1.0447	1.04299	1.03244		1.05902	0.0383424	9	0.0135561
3.66667	1.0301	1.03193	1.05127	1.12492	1.13395	1.10693	1.06169	1.06684	1.0622		1.07443	0.038447	9	0.0135931
3.83333	1.02712	1.05555	1.03624	1.14171	1.14675	1.10692	1.10049	1.07596	1.09594		1.08741	0.0425641	9	0.0150487
4	1.05212	1.07066	1.05921	1.1857	1.14406	1.09567	1.10083	1.12006	1.1044		1.10363	0.0424636	9	0.0150131
4.16667	1.02979	1.02596	1.05861	1.1621	1.156	1.11244	1.06698	1.09722	1.06814		1.08636	0.0496366	9	0.0175492
4.33333	1.03559	1.03386	1.06183	1.18759	1.16095	1.15745	1.06974	1.08282	1.10474		1.0994	0.0568963	9	0.0201159
4.5	1.07808	1.09256	1.05475	1.20718	1.19797	1.13705	1.09975	1.13128	1.13231		1.12566	0.0514038	9	0.018174
4.66667	1.07484	1.07539	1.08353	1.2477	1.23234	1.16765	1.10606	1.1511	1.12169		1.14003	0.0652974	9	0.0230861
4.83333	1.08335	1.07323	1.09726	1.23142	1.21491	1.16054	1.08759	1.11563	1.11164		1.13062	0.0583504	9	0.02063
5	1.09702	1.09105	1.08131	1.24984	1.23279	1.19051	1.13612	1.17241	1.16902		1.15779	0.0612114	9	0.0216415
5.16667	1.09338	1.0989	1.08956	1.26055	1.26231	1.22296	1.12316	1.20122	1.15416		1.16736	0.0709562	9	0.0250868
5.33333	1.10857	1.09954	1.09435	1.24951	1.24432	1.20629	1.13075	1.18118	1.15016		1.16274	0.0604239	9	0.0213631
5.5	1.10424	1.10476	1.06362	1.26854	1.2588	1.25582	1.14351	1.18671	1.16528		1.17236	0.0756727	9	0.0267543
5.66667	1.11831	1.10702	1.07429	1.26312	1.26586	1.17161	1.1293	1.19841	1.15182		1.16442	0.0672451	9	0.0237747
5.83333	1.13158	1.12097	1.08531	1.30909	1.28224	1.22869	1.0866	1.11472	1.09226		1.16127	0.0878993	9	0.0310771
6	1.11954	1.12779	1.05086	1.28897	1.29457	1.16517	1.10557	1.19634	1.14048		1.16548	0.0819675	9	0.0289799
6.16667	1.1517	1.14637	1.08264	1.2935	1.29897	1.22958	1.12005	1.17476	1.1318		1.18104	0.076518	9	0.0270532
6.33333	1.135	1.14002	1.08243	1.34532	1.31661	1.26755	1.10668	1.1908	1.13462		1.191	0.0956971	9	0.033834
6.5	1.12211	1.13483	1.09284	1.36731	1.30551	1.27089	1.13399	1.20834	1.15044		1.19847	0.0954003	9	0.0337291
6.66667	1.14133	1.13351	1.08895	1.35243	1.32765	1.25103	1.12434	1.19098	1.15295		1.19591	0.0936733	9	0.0331185
6.83333	1.16115	1.12526	1.08095	1.39606	1.36265	1.28675	1.16025	1.23496	1.16358		1.21907	0.108711	9	0.0384352
7	1.18507	1.14992	1.09331	1.39481	1.35852	1.26496	1.14636	1.2047	1.16253		1.2178	0.101775	9	0.035983
7.16667	1.16745	1.15637	1.11427	1.38967	1.34731	1.26578	1.18215	1.25296	1.20095		1.23077	0.0914597	9	0.0323359
7.33333	1.17443	1.13656	1.08956	1.39414	1.3615	1.25154	1.1449	1.17576	1.16928		1.21085	0.10417	9	0.0368298
7.5	1.18021	1.14892	1.07767	1.38166	1.37612	1.26797	1.15894	1.19986	1.17827		1.21885	0.10342	9	0.0365644
7.66667	1.18258	1.1528	1.06418	1.38132	1.35136	1.23093	1.15998	1.18954	1.1577		1.20782	0.100419	9	0.0355034	1.17077	1.13834	1.07104	1.38261	1.36223	1.23482	1.15743	1.17349	1.1749
7.83333	1.17304	1.13158	1.07901	1.39031	1.36904	1.22226	1.14574	1.15671	1.18176		1.20549	0.106192	9	0.0375445
8	1.1567	1.13063	1.06994	1.37621	1.36628	1.25128	1.16658	1.17421	1.18525		1.20856	0.103845	9	0.0367149
8.16667	1.17023	1.15231	1.0953	1.35875	1.34729	1.20343	1.13297	1.17967	1.20529		1.20503	0.0906485	9	0.0320491
8.33333	1.17774	1.15425	1.07981	1.38092	1.34269	1.26892	1.14429	1.20099	1.19937		1.21655	0.0971568	9	0.0343501
8.5	1.17987	1.14628	1.07608	1.35459	1.34872	1.24286	1.12377	1.1338	1.17752		1.19817	0.0982143	9	0.034724
8.66667	1.14948	1.12825	1.05045	1.34437	1.31144	1.18432	1.12875	1.15641	1.19653		1.18333	0.0922372	9	0.0326108
8.83334	1.15363	1.10622	1.0599	1.36448	1.29758	1.29731	1.15863	1.15714	1.19016		1.19834	0.100149	9	0.0354079
9	1.17509	1.16198	1.06912	1.36752	1.31933	1.23872	1.12921	1.11876	1.17396		1.19485	0.0968558	9	0.0342437
9.16667	1.15924	1.12751	1.07308	1.3699	1.3034	1.27917	1.1253	1.14637	1.18021		1.19602	0.0984604	9	0.034811
9.33334	1.17095	1.13972	1.04193	1.35363	1.31332	1.23003	1.13832	1.12967	1.16938		1.18744	0.0968745	9	0.0342503
9.5	1.11501	1.07328	1.03313	1.37619	1.35281	1.25233	1.13856	1.14648	1.16752		1.18392	0.119178	9	0.0421358
9.66667	1.15879	1.10859	1.01798	1.31309	1.29696	1.20082	1.11295	1.13612	1.15277		1.16645	0.0929627	9	0.0328673
9.83334	1.12647	1.1073	1.04953	1.35561	1.32274	1.25184	1.09381	1.13571	1.1573		1.17781	0.106894	9	0.0377927
10	1.10702	1.09982	1.01691	1.37279	1.32921	1.25211	1.08273	1.1629	1.14233		1.17398	0.119285	9	0.0421736
10.1667	1.1423	1.1057	1.01112	1.33635	1.31124	1.22807	1.09251	1.16748	1.14813		1.17143	0.104647	9	0.0369985
10.3333	1.16447	1.13287	1.01106	1.32931	1.2978	1.2087	1.08174	1.12728	1.15046		1.16708	0.0998756	9	0.0353114
10.5	1.15973	1.13512	1.01316	1.32074	1.29393	1.17832	1.09633	1.12386	1.1425		1.16263	0.0947992	9	0.0335166
10.6667	1.17217	1.12995	1.01161	1.31194	1.29634	1.20591	1.12691	1.1499	1.18619		1.17677	0.0909704	9	0.0321629
10.8333	1.17753	1.14845	1.00242	1.30904	1.28627	1.16547	1.12192	1.17373	1.1833		1.17424	0.0893144	9	0.0315774
11	1.15638	1.1103	0.990225	1.3464	1.32465	1.24129	1.07483	1.15617	1.13991		1.17113	0.115286	9	0.0407598
11.1667	1.16105	1.10701	0.999489	1.33929	1.29263	1.1999	1.08384	1.15026	1.15973		1.16591	0.103369	9	0.0365465
11.3333	1.15016	1.10543	0.985999	1.35995	1.30665	1.22262	1.13265	1.17496	1.16996		1.17871	0.109931	9	0.0388666
11.5	1.16398	1.11976	1.00318	1.36383	1.30662	1.21821	1.1112	1.16648	1.18558		1.18209	0.106856	9	0.0377791
11.6667	1.14219	1.11654	1.02543	1.33191	1.30567	1.18135	1.09275	1.10103	1.14212		1.15989	0.0999145	9	0.0353251
11.8333	1.16664	1.10975	1.01146	1.34812	1.31574	1.23152	1.09818	1.13137	1.16043		1.1748	0.107274	9	0.0379272
12	1.15337	1.10485	0.986898	1.3713	1.31835	1.25826	1.09428	1.12849	1.16537		1.17569	0.120184	9	0.0424915
12.1667	1.16882	1.10489	0.994053	1.35149	1.30642	1.22832	1.13115	1.14443	1.18569		1.17947	0.107092	9	0.0378628
12.3333	1.17797	1.12704	0.973723	1.31534	1.28357	1.17118	1.14165	1.14731	1.20173		1.17106	0.0979619	9	0.0346348
12.5	1.17583	1.09909	0.982955	1.33526	1.29205	1.24614	1.11374	1.1756	1.20134		1.18022	0.106824	9	0.0377679
12.6667	1.19081	1.10344	0.972141	1.31088	1.2645	1.21408	1.09746	1.09929	1.19189		1.1605	0.102872	9	0.0363706	1.17564	1.11182	0.983492	1.31915	1.2873	1.20129	1.10004	1.11178	1.20608
12.8333	1.17011	1.10855	0.985552	1.32707	1.3068	1.21686	1.09897	1.13564	1.19877		1.17204	0.106298	9	0.0375821
13	1.16601	1.12346	0.992784	1.31951	1.29061	1.17292	1.10368	1.10041	1.22758		1.16633	0.101816	9	0.0359972
PIF-ISH (514 nm)
Time	Cell 1_1	Cell 1_2	Cell 2_1	Cell 4-1	Cell 4-2	Cell 4-3	Cell 5_1	Cell 5_2	Cell 5_3		Mean	SD	Number	SEM
0	1.00853	0.932225	1.00555	1.00865	0.997738	0.997872	0.9856	1.00337	0.969783		0.989924	0.0249989	9	0.00883846
0.166667	0.982272	1.01107	0.924958	0.980028	0.95171	1.01059	0.993034	0.999601	1.01389		0.985239	0.0299829	9	0.0106005
0.333333	1.04325	0.878113	1.0204	0.97323	0.995292	0.856448	0.938893	0.963092	0.95897		0.958632	0.0611014	9	0.0216026
0.5	1.0399	0.995803	1.09144	1.03389	0.97767	1.05927	0.996649	0.9913	0.985313		1.01903	0.0390123	9	0.0137929
0.666667	0.959789	0.988338	0.955552	0.967859	0.987217	0.969735	0.972893	0.971393	1.02443		0.977467	0.0206805	9	0.00731165
0.833333	0.971466	1.01721	0.999575	0.985866	1.02375	0.918975	0.981215	1.02909	1.00455		0.992411	0.0338025	9	0.011951
1	0.974907	0.999493	0.977649	0.998431	1.01912	1.01693	1.00014	0.964317	0.94103		0.988002	0.0255913	9	0.00904788
1.16667	0.94084	0.921465	1.15524	1.00327	1.01312	0.99036	0.995927	0.959829	0.983506		0.995951	0.0668932	9	0.0236503
1.33333	0.963675	0.952901	0.988045	1.00146	1.00579	0.955667	0.992098	1.00458	1.00046		0.984964	0.0215949	9	0.00763494
1.5	0.995392	1.01031	0.912805	0.959166	1.00673	0.980634	0.992332	0.989689	1.00673		0.983754	0.03093	9	0.0109354
1.66667	1.02731	1.02417	1.02391	1.00808	0.940268	1.03964	0.9768	0.985242	1.05303		1.00872	0.0353388	9	0.0124941
1.83333	1.00024	0.946141	0.999348	0.969809	0.997265	0.999088	1.01073	1.02262	0.990152		0.992821	0.0225862	9	0.00798541
2	1.02004	1.13318	1.06898	0.987604	1.0257	1.05554	1.03128	1.04069	0.997555		1.04006	0.043287	9	0.0153043
2.16667	1.03664	1.05648	0.956147	1.01028	1.02267	0.913678	1.03075	1.00347	0.955303		0.99838	0.0467152	9	0.0165163
2.33333	0.950259	0.931831	1.04099	1.02113	0.95576	1.03231	1.03116	1.01213	1.03516		1.00119	0.0427061	9	0.0150989
2.5	1.00305	1.13789	0.912918	1.03873	1.07764	1.14025	1.01115	0.99598	1.10093		1.0465	0.0747227	9	0.0264185
2.66667	1.04893	1.0287	0.965609	1.01984	1.02699	0.923491	1.01555	1.04409	0.997899		1.0079	0.0403187	9	0.0142548	1.04326	1.06112	0.943994	1.04026	1.0164	1.03844	1.04298	1.04624	1.00483
2.83333	1.03488	1.0369	1.00102	1.03385	0.976433	1.14342	1.05493	1.02153	0.982868		1.03176	0.0494298	9	0.0174761
3	1.04598	1.11775	0.865354	1.0671	1.04579	1.04842	1.05846	1.0731	1.03371		1.03952	0.0697269	9	0.0246522
3.16667	1.17964	1.02625	1.13589	1.10517	1.04982	1.16122	1.13231	1.13468	1.02638		1.10571	0.0578098	9	0.0204389
3.33333	1.36351	1.236	1.2381	1.2836	1.36744	1.32414	1.18385	1.20794	1.28096		1.27617	0.0657448	9	0.0232443
3.5	1.3752	1.35932	1.48365	1.35825	1.39753	1.47577	1.1978	1.20479	1.25201		1.34492	0.106272	9	0.0375729
3.66667	1.43956	1.43456	1.46229	1.37302	1.45124	1.58806	1.18758	1.20885	1.1827		1.36976	0.144053	9	0.0509305
3.83333	1.50372	1.44439	1.46949	1.47187	1.48396	1.62623	1.18224	1.24341	1.28407		1.41215	0.143615	9	0.0507756
4	1.47132	1.53794	1.56462	1.48743	1.49298	1.50899	1.19755	1.28078	1.34535		1.43188	0.126698	9	0.0447944
4.16667	1.48203	1.48732	1.5017	1.5145	1.43943	1.59818	1.21877	1.26447	1.35535		1.42908	0.124615	9	0.044058
4.33333	1.37955	1.35524	1.58493	1.57148	1.54769	1.72536	1.22945	1.32216	1.3068		1.44696	0.164955	9	0.0583204
4.5	1.42167	1.35935	1.41275	1.48595	1.52457	1.6934	1.23598	1.32154	1.38449		1.42663	0.131429	9	0.0464671
4.66667	1.50093	1.33037	1.48686	1.61536	1.60074	1.71316	1.22001	1.32044	1.30107		1.45433	0.169291	9	0.0598535
4.83333	1.51155	1.42344	1.41232	1.55199	1.55447	1.79705	1.22107	1.32986	1.32913		1.45899	0.168967	9	0.0597388
5	1.51132	1.34617	1.5653	1.59006	1.54989	1.7703	1.2413	1.36725	1.37319		1.47942	0.161452	9	0.057082
5.16667	1.43473	1.40056	1.38864	1.58909	1.62964	1.76062	1.22316	1.33641	1.33908		1.45577	0.169892	9	0.0600659
5.33333	1.51347	1.44797	1.48229	1.60683	1.6374	1.76392	1.20128	1.28681	1.41785		1.4842	0.174045	9	0.0615342
5.5	1.4809	1.46127	1.68269	1.66623	1.64316	1.61893	1.19559	1.3569	1.40162		1.50081	0.165955	9	0.0586739
5.66667	1.46338	1.37924	1.45246	1.63538	1.55873	1.85827	1.20754	1.39219	1.35179		1.47766	0.188066	9	0.0664914
5.83333	1.48133	1.52808	1.56805	1.66691	1.67375	1.68402	1.1937	1.35497	1.3634		1.50158	0.169989	9	0.0601001
6	1.57672	1.42144	1.5102	1.61945	1.67901	1.80083	1.23009	1.3783	1.37359		1.50996	0.177385	9	0.0627149
6.16667	1.49573	1.42473	1.63972	1.63881	1.66967	1.76274	1.23782	1.38702	1.37657		1.51476	0.172145	9	0.0608625
6.33333	1.53336	1.56296	1.46031	1.64578	1.63114	1.80356	1.22691	1.35096	1.33994		1.5061	0.180044	9	0.063655
6.5	1.54519	1.54913	1.41822	1.67854	1.6778	1.78528	1.2579	1.36462	1.41889		1.52173	0.171496	9	0.060633
6.66667	1.54317	1.46293	1.57598	1.61192	1.71178	1.72996	1.23105	1.2947	1.43731		1.51098	0.171973	9	0.0608015
6.83333	1.53906	1.51456	1.44768	1.65589	1.74069	1.93565	1.2147	1.38333	1.35622		1.53198	0.218797	9	0.0773565
7	1.57219	1.45648	1.54218	1.62611	1.66249	1.71116	1.22362	1.28267	1.42553		1.50027	0.167684	9	0.0592852
7.16667	1.57213	1.44203	1.41569	1.57733	1.73493	1.7733	1.22877	1.31915	1.46625		1.50329	0.179879	9	0.0635967
7.33333	1.53261	1.4167	1.49252	1.6465	1.63175	1.81446	1.21613	1.3346	1.41569		1.50011	0.180559	9	0.0638371
7.5	1.54238	1.53642	1.54071	1.63355	1.72933	1.90434	1.23814	1.3713	1.36458		1.54008	0.202395	9	0.0715576
7.66667	1.57733	1.46755	1.58093	1.67063	1.76244	1.82731	1.24274	1.37196	1.43333		1.54825	0.188672	9	0.0667055	1.56361	1.44575	1.51504	1.65389	1.69865	1.75705	1.22097	1.32046	1.42212
7.83333	1.57135	1.37665	1.46082	1.63395	1.65652	1.68723	1.22123	1.30193	1.47994		1.48774	0.164062	9	0.0580046
8	1.54215	1.49304	1.50337	1.6571	1.67699	1.75662	1.19893	1.28749	1.35308		1.49653	0.187409	9	0.0662591
8.16667	1.44021	1.42293	1.2998	1.64404	1.68254	1.90543	1.2202	1.34006	1.34614		1.47793	0.221132	9	0.0781818
8.33333	1.25833	1.23549	1.03847	1.75408	1.69137	2.05007	1.14215	1.22055	1.23256		1.40256	0.342302	9	0.121022
8.5	1.15259	1.16087	0.852606	1.6498	1.59713	1.78632	1.11548	1.20282	1.18177		1.29993	0.305342	9	0.107955
8.66667	1.12846	1.14296	0.934618	1.49344	1.40289	1.49844	1.12335	1.18053	1.05632		1.21789	0.199736	9	0.0706172
8.83334	1.1069	1.11634	0.84	1.43859	1.37933	1.48454	1.10335	1.19798	1.101		1.19645	0.204434	9	0.0722784
9	1.16958	1.07704	0.90983	1.43891	1.31983	1.42362	1.09612	1.1825	1.0421		1.18439	0.178719	9	0.0631867
9.16667	1.15463	1.08197	1.03881	1.38724	1.33795	1.36192	1.12706	1.18089	1.07772		1.19424	0.133519	9	0.0472061
9.33334	1.19062	1.12823	0.938329	1.35094	1.30739	1.23656	1.1622	1.17274	1.00131		1.16537	0.132391	9	0.0468072
9.5	1.20333	1.15318	1.00839	1.30526	1.2051	1.19592	1.12349	1.18524	1.06677		1.16074	0.0865962	9	0.0306164
9.66667	1.23483	1.13445	1.06337	1.31531	1.23993	1.3066	1.16043	1.21172	1.0697		1.19293	0.0926438	9	0.0327545
9.83334	1.17911	1.12882	1.16711	1.34393	1.25834	1.21255	1.16291	1.21513	1.14196		1.2011	0.0669179	9	0.0236591
10	1.11734	1.1298	1.05391	1.30916	1.18054	1.3426	1.15067	1.23627	1.04864		1.17433	0.103958	9	0.0367548
10.1667	1.15705	1.21538	1.11221	1.30899	1.27514	1.28676	1.13894	1.21601	1.09143		1.20021	0.0795394	9	0.0281214
10.3333	1.19793	1.04273	1.0913	1.25199	1.22783	1.20217	1.1535	1.23268	1.17839		1.17539	0.0691763	9	0.0244575
10.5	1.22209	1.07862	1.12493	1.31645	1.20544	1.23482	1.22041	1.19642	1.15362		1.19476	0.0689131	9	0.0243645
10.6667	1.17844	1.09989	1.11773	1.30905	1.24766	1.20729	1.21588	1.26645	1.0978		1.19335	0.0759826	9	0.0268639
10.8333	1.15487	1.1298	1.02955	1.23932	1.26486	1.18254	1.22704	1.26779	1.10659		1.17804	0.0804577	9	0.0284461
11	1.17913	1.09696	1.04252	1.30065	1.26189	1.06626	1.23247	1.26083	1.04676		1.16527	0.103129	9	0.0364615
11.1667	1.22457	1.09859	1.08589	1.28551	1.29758	1.11116	1.2116	1.26663	1.16536		1.1941	0.0822312	9	0.0290731
11.3333	1.19909	1.01217	1.1634	1.28632	1.3026	1.24043	1.2492	1.25285	1.09211		1.1998	0.0955815	9	0.0337932
11.5	1.24021	1.11837	1.07218	1.29314	1.2979	1.13639	1.23029	1.20786	1.10246		1.18876	0.0838744	9	0.0296541
11.6667	1.15505	1.06659	1.00875	1.2732	1.28501	1.1274	1.20205	1.22985	1.08313		1.159	0.0959676	9	0.0339297
11.8333	1.23558	1.00651	1.10527	1.2628	1.30318	1.10751	1.26018	1.21923	1.14447		1.18275	0.0969656	9	0.0342825
12	1.27285	1.08808	1.08363	1.25822	1.23674	1.23461	1.22048	1.26176	1.14428		1.20007	0.0747085	9	0.0264134
12.1667	1.22215	1.17296	1.11586	1.32625	1.22809	1.12861	1.2425	1.26512	1.16446		1.20733	0.0679632	9	0.0240286
12.3333	1.25159	1.11589	1.09748	1.27275	1.25029	1.03026	1.26294	1.26089	1.15632		1.18871	0.0903534	9	0.0319448
12.5	1.23523	1.17068	1.17105	1.25098	1.22854	1.0657	1.28777	1.24503	1.09558		1.19451	0.0747931	9	0.0264434
12.6667	1.23895	1.02989	0.973513	1.24724	1.20873	0.979852	1.26436	1.26605	1.165		1.15262	0.123516	9	0.0436696	1.22938	1.09517	1.06023	1.27153	1.21596	1.0812	1.27789	1.23798	1.13647
12.8333	1.21688	1.16192	1.11858	1.27847	1.25339	1.10452	1.28267	1.22618	1.14106		1.19819	0.0684221	9	0.0241909
13	1.23231	1.09369	1.08861	1.28888	1.18577	1.15923	1.28665	1.22171	1.10336		1.18447	0.078792	9	0.0278572
