# Supplementary material for: Genetic code expansion, click chemistry, and light-activated PI3K reveal details of membrane protein trafficking downstream of receptor tyrosine kinases
Source: eLife. 2024 Aug 20;12:RP91012. doi: 10.7554/eLife.91012 (PMC11335347; doi:10.7554/eLife.91012)
Supplement: Figure 1—source data 1. [file elife-91012-fig1-data1.xlsx]

## Sheet: groups
	ISH-PIF count			Akt-PH count			TRP count			ISH-PIF %			Akt-PH %			TRP %
	no response	non-reversible	reversible	no response	non-reversible	reversible	no response	non-reversible	reversible	no response	non-reversible	reversible	no response	non-reversible	reversible	no response	non-reversible	reversible
PIF-control	#REF!	#REF!	#REF!	#REF!	#REF!	0	#REF!	#REF!	0	#REF!	#REF!	#REF!	#REF!	#REF!	#REF!	#REF!	#REF!	#REF!
ISH-control	#REF!	#REF!	#REF!	#REF!	0	#REF!	--	--	--	#REF!	#REF!	#REF!	#REF!	#REF!	#REF!	#VALUE!	#VALUE!	#VALUE!
TRPV1	#REF!	#REF!	0	#REF!	#REF!	#REF!	#REF!	#REF!	#REF!	#REF!	#REF!	#REF!	#REF!	#REF!	#REF!	#REF!	#REF!	#REF!
TRPV1-ARD	#REF!	#REF!	#REF!	--	--	--	#REF!	#REF!	#REF!	#REF!	#REF!	#REF!	#VALUE!	#VALUE!	#VALUE!	#REF!	#REF!	#REF!
TRPV2	--	--	--	#REF!	#REF!	#REF!	#REF!	#REF!	#REF!	#VALUE!	#VALUE!	#VALUE!	#REF!	#REF!	#REF!	#REF!	#REF!	#REF!
TRPV4	#REF!	#REF!	#REF!	#REF!	#REF!	#REF!	--	--	--	#REF!	#REF!	#REF!	#REF!	#REF!	#REF!	#VALUE!	#VALUE!	#VALUE!
TRPV6	#REF!	#REF!	#REF!	#REF!	0	#REF!	--	--	--	#REF!	#REF!	#REF!	#REF!	#REF!	#REF!	#VALUE!	#VALUE!	#VALUE!
TRPA1	#REF!	#REF!	0	#REF!	#REF!	0	--	--	--	#REF!	#REF!	#REF!	#REF!	#REF!	#REF!	#VALUE!	#VALUE!	#VALUE!
TRPM4	#REF!	#REF!	#REF!	#REF!	#REF!	#REF!	#REF!	#REF!	0	#REF!	#REF!	#REF!	#REF!	#REF!	#REF!	#REF!	#REF!	#REF!
TRPM8	#REF!	#REF!	#REF!	#REF!	#REF!	#REF!	--	--	--	#REF!	#REF!	#REF!	#REF!	#REF!	#REF!	#VALUE!	#VALUE!	#VALUE!

## Sheet: eLife_Plot
PIF-iSH2-YFP																																			Akt-PH-CFP
	Normalized								Average (1.5/4.5/7.5 min)												T.Test (750 (1) vs 650)	T.Test (650 vs 750(2))			Data for Scatter Plot											Normalized								Average (30 s interval at 1.5/4.5/7.5 min)
time	ISHnoTRPV1_UpDOWN_X5.05.16slp3_cell1	ISHnoTRPV1_UpDOWN_X5.05.16slp3_cell2	ISHnoTRPV1_UpDOWN_X5.05.16slp3_cell3	ISHnoTRPV1_UpDOWN_X5.05.16slp3_cell4	ISHnoTRPV1_UpDOWN_X5.05.16slp3_cell5	ISHnoTRPV1_UpDOWN_X5.05.16slp3_cell6	ISHnoTRPV1_UpDOWN_X5.05.16slp3_cell7		ISHnoTRPV1_UpDOWN_X5.05.16slp3_cell1	ISHnoTRPV1_UpDOWN_X5.05.16slp3_cell2	ISHnoTRPV1_UpDOWN_X5.05.16slp3_cell3	ISHnoTRPV1_UpDOWN_X5.05.16slp3_cell4	ISHnoTRPV1_UpDOWN_X5.05.16slp3_cell5	ISHnoTRPV1_UpDOWN_X5.05.16slp3_cell6	ISHnoTRPV1_UpDOWN_X5.05.16slp3_cell7						0.000248026	0.00161151			ISHnoTRPV1_UpDOWN_X5.05.16slp3_cell1	ISHnoTRPV1_UpDOWN_X5.05.16slp3_cell2	ISHnoTRPV1_UpDOWN_X5.05.16slp3_cell3	ISHnoTRPV1_UpDOWN_X5.05.16slp3_cell4	ISHnoTRPV1_UpDOWN_X5.05.16slp3_cell5	ISHnoTRPV1_UpDOWN_X5.05.16slp3_cell6	ISHnoTRPV1_UpDOWN_X5.05.16slp3_cell7				time	Akt.PHwISHnoTRPV1_UpDOWN_X5.05.16slp3_cell1	Akt.PHwISHnoTRPV1_UpDOWN_X5.05.16slp3_cell2	Akt.PHwISHnoTRPV1_UpDOWN_X5.05.16slp3_cell3	Akt.PHwISHnoTRPV1_FLAT_X5.05.16slp3_cell4	Akt.PHwISHnoTRPV1_UpDOWN_X5.05.16slp3_cell5	Akt.PHwISHnoTRPV1_UpDOWN_X5.05.16slp3_cell6	Akt.PHwISHnoTRPV1_UpDOWN_X5.05.16slp3_cell7		ISHnoTRPV1_UpDOWN_X5.05.16slp3_cell1	ISHnoTRPV1_UpDOWN_X5.05.16slp3_cell2	ISHnoTRPV1_UpDOWN_X5.05.16slp3_cell3	ISHnoTRPV1_UpDOWN_X5.05.16slp3_cell4	ISHnoTRPV1_UpDOWN_X5.05.16slp3_cell5	ISHnoTRPV1_UpDOWN_X5.05.16slp3_cell6
0.166667	1.05041	1.04307	1.09007	1.06335	1.06113	1.0429	1.07117																		0.966247	0.979241	0.975674	0.990827	0.974825	0.976551	0.978743				0.166667	0.953425	0.955092	0.929849	0.998178	0.993475	1.00538	0.99913
0.333333	1.08247	1.0391	1.07502	1.04904	1.02912	1.04935	1.01635																		1.3048	1.20475	1.46834	1.16806	1.32214	1.24005	1.24355				0.333333	0.997675	1.01118	0.972339	1.03363	1.03865	1.0419	1.03639
0.5	1.03085	1.00914	0.99086	0.992742	1.00621	1.0028	0.990177																		1.03337	1.02429	1.00839	1.05626	1.11694	1.01915	1.07742				0.5	1.00858	1.03402	0.965402	1.00837	1.0183	1.01315	1.02079
0.666667	1.01393	1.00118	1.01908	0.987538	1.00885	0.991636	1.01326																												0.666667	1.00805	1.04053	0.982849	0.999275	1.0228	1.01766	1.01377
0.833333	1.02364	1.01097	0.986979	0.967445	1.01741	0.987776	1.0071																												0.833333	1.01756	1.03669	0.992078	0.953604	1.01803	0.995333	1.00506
1	1.01802	1.01574	1.01963	0.997459	1.00541	1.02592	1.02264																												1	1.02062	1.02548	0.991738	0.984945	1.00438	1.00772	0.996498
1.16667	0.963506	1.0071	0.952555	1.00112	0.99215	1.00849	1.0013																												1.16667	1.004	1.02307	1.02914	1.00395	0.998628	1.00823	1.0129
1.33333	0.990753	0.997488	0.993382	1.01257	0.986702	0.999179	1.00599																												1.33333	1.00406	1.0075	1.04397	1.01409	0.990353	0.992916	1.00444
1.5	0.958183	0.977945	1.00738	0.993252	0.975322	0.984243	0.973957		0.966247	0.979241	0.975674	0.990827	0.974825	0.976551	0.978743																				1.5	0.997015	0.990153	1.04465	1.01475	0.970417	0.979036	0.990296		0.999575	0.986054	1.04071	1.00699	0.979589	0.981944
1.66667	0.949804	0.962289	0.926254	0.966655	0.962452	0.94623	0.956279																												1.66667	0.997651	0.960508	1.03352	0.992145	0.977997	0.97388	0.975711
1.83333	0.959389	0.973193	0.967491	0.994863	0.979033	0.980253	0.977901																												1.83333	0.998062	0.960351	1.00658	1.01355	0.981729	0.98007	0.977125
2	0.959053	0.962793	0.97129	0.973956	0.976204	0.981225	0.963867																												2	0.993295	0.955427	1.00788	0.983521	0.985234	0.984738	0.967885
2.16667	0.971925	0.969037	0.962807	0.986309	0.968215	0.949744	0.962053																												2.16667	1.01781	0.944477	1.03137	0.993773	0.992591	0.960781	0.969133
2.33333	0.951227	0.985318	1.00725	0.992247	0.971748	1.00372	0.970216																												2.33333	1.01238	0.946228	1.01315	0.978177	0.991433	0.961954	0.961291
2.5	0.964244	0.997625	1.02168	0.996482	1.00613	0.988503	1.01395																												2.5	1.03294	0.940553	1.02262	0.982787	0.987816	0.948667	0.967505
2.66667	0.958203	0.970456	0.961399	0.991574	0.969984	0.991585	0.961146																												2.66667	1.05765	0.931651	1.03225	0.983702	1.00253	0.969623	0.970704
2.83333	0.970265	0.978296	1.01778	1.01198	0.999074	0.975647	0.97505																												2.83333	1.0758	0.937169	1.02785	0.980054	0.994579	0.983431	0.961578
3	0.970588	0.975079	1.02689	0.997264	0.99156	0.970249	0.983585																												3	1.08476	0.933654	1.02776	0.990528	0.988645	0.994682	0.965317
3.16667	0.992018	1.04552	1.12964	1.09957	0.987876	1.08117	1.00044																												3.16667	1.07654	0.934694	1.03288	1.00814	0.989752	0.998144	0.954804
3.33333	1.093	1.09745	1.19831	1.09963	1.05778	1.13691	1.05515																												3.33333	1.08474	0.955213	1.06054	1.01543	0.993512	1.00365	0.958142
3.5	1.15451	1.13282	1.25479	1.14337	1.10748	1.16246	1.11045																												3.5	1.10824	0.975283	1.09638	1.04537	1.01124	1.01972	0.970108
3.66667	1.19783	1.14877	1.33698	1.15762	1.13653	1.2106	1.13584																												3.66667	1.1397	1.00677	1.12671	1.07587	1.01727	1.07415	0.994222
3.83333	1.21823	1.15249	1.29311	1.14115	1.13962	1.2247	1.15101																												3.83333	1.14595	1.01599	1.14042	1.08337	1.00739	1.0857	0.992446
4	1.23881	1.14707	1.3716	1.16943	1.14907	1.23101	1.14555																												4	1.15528	1.02325	1.14905	1.09119	1.00628	1.12257	0.992246
4.16667	1.25431	1.17608	1.40108	1.17135	1.17533	1.21471	1.15789																												4.16667	1.15496	1.04181	1.15843	1.10725	1.00179	1.16379	1.00849
4.33333	1.26807	1.20196	1.41513	1.16215	1.20565	1.27043	1.16483																												4.33333	1.17567	1.05757	1.17417	1.10147	1.01191	1.19857	1.01689
4.5	1.2665	1.20199	1.41497	1.1905	1.22137	1.28519	1.18354																												4.5	1.18772	1.09101	1.16844	1.07668	1.01822	1.23051	1.02946
4.66667	1.30974	1.21575	1.48097	1.19291	1.2512	1.28496	1.20349																												4.66667	1.19229	1.11065	1.17857	1.07286	1.0312	1.23983	1.04871
4.83333	1.30509	1.20637	1.41528	1.16591	1.24053	1.27054	1.21707																												4.83333	1.19359	1.11319	1.20557	1.03446	1.04179	1.27833	1.05217
5	1.28798	1.2108	1.45396	1.16777	1.26868	1.26276	1.20037																												5	1.1797	1.13812	1.20344	1.03315	1.05549	1.3348	1.06536
5.16667	1.31392	1.22338	1.48378	1.16157	1.26545	1.29748	1.20851																												5.16667	1.15624	1.12021	1.19884	0.991446	1.05398	1.30739	1.05734
5.33333	1.29505	1.20718	1.41785	1.11804	1.24902	1.2403	1.1925																												5.33333	1.14814	1.0814	1.21409	1.00506	1.12666	1.27078	1.09016
5.5	1.28505	1.19408	1.51269	1.13598	1.29213	1.22183	1.23443																												5.5	1.1616	1.09559	1.20742	0.982372	1.09288	1.29687	1.0697
5.66667	1.29213	1.2036	1.46664	1.13763	1.3067	1.23906	1.23488		1.3048	1.20475	1.46834	1.16806	1.32214	1.24005	1.24355																				5.66667	1.16372	1.10914	1.20032	0.988621	1.09807	1.28753	1.07548		1.17341	1.14231	1.20203	1.01002	1.10662	1.30922
5.83333	1.31762	1.20841	1.49847	1.17235	1.32449	1.24197	1.24853																												5.83333	1.17795	1.14296	1.20624	1.01976	1.10804	1.30867	1.08701
6	1.30466	1.20224	1.43991	1.19419	1.33521	1.23913	1.24722																												6	1.17855	1.17482	1.19952	1.02168	1.11374	1.33145	1.10346
6.16667	1.26949	1.10325	1.3849	1.112	1.29893	1.09755	1.20204																												6.16667	1.17207	1.17049	1.13197	1.01292	1.11127	1.32161	1.09975
6.33333	1.16897	1.05934	1.19085	1.07893	1.29352	1.04113	1.17579																												6.33333	1.15501	1.15986	1.12138	0.95918	1.1255	1.31726	1.10494
6.5	1.11506	1.05006	1.12911	1.06021	1.25738	1.02553	1.14792																												6.5	1.15076	1.14125	1.09808	0.96821	1.12944	1.30161	1.1019
6.66667	1.07398	1.04615	1.12233	1.05468	1.23064	1.03287	1.13131																												6.66667	1.13668	1.13451	1.08222	0.967599	1.12412	1.28852	1.10479
6.83333	1.04441	1.01624	1.06876	1.00359	1.1868	1.00848	1.07005																												6.83333	1.13931	1.14477	1.05156	0.952396	1.09946	1.27305	1.08362
7	1.03502	1.02337	1.00427	1.02443	1.17419	1.01651	1.07366																												7	1.13798	1.13661	1.04394	0.943731	1.09499	1.24598	1.06363
7.16667	1.03064	1.01813	1.0001	0.998046	1.16457	1.03562	1.06034																												7.16667	1.12301	1.13027	1.0292	0.928164	1.0952	1.21628	1.05659
7.33333	1.02077	1.01836	1.00152	1.00083	1.14915	1.02684	1.05966																												7.33333	1.10458	1.10971	1.01673	0.917879	1.06664	1.17418	1.03353
7.5	1.03673	1.03373	1.0299	1.02739	1.17034	1.06466	1.0856																												7.5	1.11121	1.10523	1.00413	0.918759	1.06994	1.16125	1.03974
7.66667	1.0258	1.034	1.00386	1.04908	1.15424	1.02307	1.07981																												7.66667	1.10821	1.10198	0.988114	0.915291	1.05029	1.12716	1.02844
7.83333	1.0395	1.03002	1.0451	1.03803	1.17067	0.996247	1.07018																												7.83333	1.1036	1.08908	0.996787	0.950014	1.04659	1.13187	1.01733
8	1.02469	1.03529	1.03601	1.06553	1.15473	1.01554	1.10482																												8	1.09682	1.09076	0.991026	0.949231	1.04305	1.10668	1.01458
8.16667	1.02841	1.03978	1.07423	1.09835	1.15994	0.993976	1.09981																												8.16667	1.07709	1.07047	0.973545	0.929425	1.02376	1.10971	1.01184
8.33333	1.02449	1.02294	1.0187	1.06207	1.1288	1.02294	1.06731																												8.33333	1.06978	1.03092	0.992439	0.920812	1.0157	1.10827	1.00103
8.5	1.02851	1.03985	1.0622	1.07903	1.12773	0.996818	1.092																												8.5	1.06755	1.02834	0.975206	0.906313	1.00575	1.0944	1.00661
8.66667	1.03156	1.02847	1.02673	1.06439	1.10613	1.01983	1.06801																												8.66667	1.0587	1.03153	0.946234	0.918567	0.993115	1.09815	0.983262
8.83333	1.03013	1.02238	0.98806	1.04115	1.11824	1.01814	1.06751		1.03337	1.02429	1.00839	1.05626	1.11694	1.01915	1.07742																				8.83333	1.05543	1.03692	0.924541	0.916221	0.997133	1.11413	0.984346		1.05211	1.02495	0.929252	0.920974	0.994128	1.10714
9	1.03841	1.02201	1.01038	1.06323	1.12646	1.01948	1.09675																												9	1.04222	1.0064	0.916979	0.928135	0.992136	1.10916	0.978844
9.16667	1.09655	1.12066	1.08206	1.09704	1.15519	1.14917	1.11731																												9.16667	1.03653	1.00912	0.926721	0.946694	0.993204	1.11616	0.977121
9.33333	1.15515	1.14532	1.16188	1.12356	1.16622	1.18662	1.13162																												9.33333	1.03726	1.02098	0.941273	0.961419	0.986993	1.13525	0.999132
9.5	1.21775	1.15931	1.22472	1.12887	1.1834	1.25321	1.12525																												9.5	1.04218	1.03018	0.975159	0.9806	0.996656	1.17084	1.00215
9.66667	1.25507	1.17838	1.2465	1.13908	1.20837	1.24688	1.16641																												9.66667	1.03704	1.0452	0.987251	1.00577	0.997928	1.18557	0.996987
9.83333	1.30029	1.19845	1.30407	1.14568	1.22718	1.2849	1.19551																												9.83333	1.03693	1.07373	1.00061	1.01962	1.00815	1.21387	1.0054
10	1.36803	1.23154	1.30308	1.18439	1.26766	1.30417	1.21775																												10	1.03447	1.0732	0.983939	1.01479	1.01107	1.19641	1.01259
10.1667	1.30142	1.20053	1.26699	1.13905	1.25067	1.3047	1.18134																												10.1667	1.04288	1.06965	0.96646	0.986623	1.01514	1.19771	1.01389
10.3333	1.33494	1.19352	1.29526	1.17185	1.22882	1.30462	1.19508																												10.3333	0.998835	1.04349	0.958756	1.00145	1.0602	1.17501	1.0351
10.5	1.32132	1.19649	1.26933	1.16239	1.2389	1.3077	1.19599																												10.5	1.00401	1.08856	0.95546	1.00539	1.02975	1.21839	1.02469
10.6667	1.30151	1.19102	1.28689	1.14906	1.22905	1.28761	1.173																												10.6667	1.00636	1.12001	0.955766	1.01482	1.03071	1.25974	1.04285
10.8333	1.29651	1.18018	1.28443	1.12732	1.24973	1.27749	1.1924																												10.8333	0.995824	1.11567	0.949961	0.982849	1.01625	1.26789	1.04034
11	1.33058	1.19248	1.29668	1.13305	1.2472	1.26662	1.21657																												11	0.989905	1.13203	0.940184	0.975949	1.00584	1.283	1.04454
11.1667	1.28321	1.20072	1.26294	1.11917	1.22595	1.27801	1.18589																												11.1667	0.99845	1.13499	0.929746	0.976319	0.995784	1.27749	1.04106
11.3333	1.32513	1.20231	1.2383	1.14002	1.24486	1.27843	1.19969																												11.3333	0.993631	1.13538	0.92047	0.962756	1.00217	1.29219	1.05261
11.5	1.32661	1.18556	1.27508	1.13476	1.25269	1.26427	1.22146																												11.5	0.992781	1.11393	0.92783	0.94005	1.01096	1.27352	1.06341
11.6667	1.32985	1.19491	1.31345	1.10787	1.27966	1.28667	1.23631																												11.6667	1.00012	1.0873	0.926632	0.935002	1.026	1.26563	1.07142
11.8333	1.3481	1.19968	1.30656	1.11758	1.27875	1.30375	1.24665																												11.8333	1.01072	1.08781	0.919428	0.961207	1.03567	1.30152	1.07391
12	1.32656	1.19992	1.30837	1.13983	1.28741	1.29865	1.22547																												12	1.00584	1.08174	0.92178	0.961178	1.02736	1.31044	1.06377
12.1667	1.27097	1.10474	1.2382	1.13157	1.24945	1.16431	1.20596																												12.1667	1.0148	1.0927	0.924464	0.969775	1.03582	1.31962	1.06363
12.3333	1.15293	1.06547	1.15232	1.09546	1.2387	1.06312	1.24799																												12.3333	1.00363	1.06576	0.923543	0.9661	1.03446	1.27935	1.05833
12.5	1.11077	1.04333	1.11744	1.10072	1.22189	1.05676	1.20091																												12.5	0.988757	1.04293	0.901694	0.968841	1.02178	1.25877	1.0585
12.6667	1.07056	1.03529	1.01552	1.10422	1.2066	1.03346	1.19561																												12.6667	0.973236	1.02058	0.870633	0.966063	1.0217	1.21258	1.04806
12.8333	1.07944	1.03044	1.0357	1.07866	1.19265	1.04949	1.1935																												12.8333	0.968981	0.995702	0.860977	0.954835	1.01305	1.21069	1.05423
13	1.06085	1.02766	1.02756	1.07129	1.19047	1.04686	1.18705																												13	0.957217	0.987352	0.853845	0.942759	1.01651	1.20558	1.04917
13.1667	1.04307	1.033	0.989845	1.05298	1.15743	1.04306	1.16667																												13.1667	0.955737	0.980213	0.835857	0.933121	1.00088	1.16672	1.0341
13.3333	1.05677	1.02776	0.999458	1.02792	1.15594	1.02802	1.17197																												13.3333	0.94774	0.962987	0.817109	0.897115	0.993294	1.16453	1.0308
13.5	1.08566	1.05116	1.03375	1.02821	1.17695	1.07559	1.20957																												13.5	0.960592	0.966812	0.807497	0.900815	0.987978	1.14002	1.02322
13.6667	1.05566	1.03665	1.05941	1.01373	1.17526	1.07627	1.18942																												13.6667	0.94756	0.976319	0.797662	0.879576	0.989321	1.12796	1.01209
13.8333	1.04427	1.02094	1.05358	0.964242	1.14217	1.02858	1.15291																												13.8333	0.950184	0.956613	0.794586	0.852256	0.994475	1.09126	1.01084
14	1.04018	1.02396	0.989157	0.953403	1.12788	1.02268	1.14821																												14	0.957221	0.951697	0.776454	0.838615	0.981559	1.0656	1.01994
14.1667	1.02844	1.01435	1.00675	0.933127	1.11433	1.021	1.14576																												14.1667	0.964852	0.951721	0.765296	0.81305	0.968359	1.08099	1.0123
14.3333	1.00784	1.02021	0.944743	0.960229	1.11021	1.03707	1.16216																												14.3333	0.971934	0.938847	0.768316	0.82454	0.97569	1.05951	1.00527
14.5	1.02326	1.02533	1.01744	0.941825	1.08084	1.03214	1.13279																												14.5	0.966024	0.948376	0.758219	0.827244	0.965066	1.04459	1.00523
14.6667	1.01621	1.03588	0.989698	0.971243	1.11202	1.05437	1.14222																												14.6667	0.95733	0.946856	0.740153	0.807955	0.957174	1.02841	1.00467
14.8333	1.03575	1.03101	1.04531	0.945884	1.11032	1.06623	1.11869																												14.8333	0.956919	0.958935	0.738877	0.795881	0.963332	1.01844	1.00339
15	1.02706	1.02232	1.02494	0.938766	1.10619	1.06797	1.10788																												15	0.971172	0.966539	0.724336	0.810907	0.955203	1.01699	0.996176
15.1667	1.01471	1.01105	0.971372	0.940416	1.09356	1.04061	1.0887																												15.1667	0.972617	0.941088	0.725057	0.801324	0.953449	0.990365	0.99223
15.3333	1.07048	1.03858	1.03568	0.904105	1.09349	1.06141	1.05937																												15.3333	0.967248	0.926149	0.730607	0.800836	1.00102	1.00977	1.01007
15.5	1.04988	1.01799	0.97848	0.932189	1.10551	1.05973	1.08454																												15.5	0.982477	0.957141	0.711813	0.803378	0.965638	1.0429	1.00637
15.6667	1.08331	1.06138	1.0779	0.981502	1.15211	1.09317	1.16314																												15.6667	0.979418	0.942642	0.707713	0.806477	0.969975	1.05904	1.01199
15.8333	1.06207	1.07021	1.01728	0.991991	1.15454	1.09571	1.14765																												15.8333	0.966447	0.94922	0.705795	0.836139	0.966378	1.03095	1.00781
[truncated: 10 more columns]
