# Supplementary material for: Genetic code expansion, click chemistry, and light-activated PI3K reveal details of membrane protein trafficking downstream of receptor tyrosine kinases
Source: eLife. 2024 Aug 20;12:RP91012. doi: 10.7554/eLife.91012 (PMC11335347; doi:10.7554/eLife.91012)
Supplement: Figure 2—figure supplement 1—source data 1. [file elife-91012-fig2-figsupp1-data1.xlsx]

## Sheet: Sheet1
TRPV1 (HEK)
Time (min)	Cell 6-1	Cell 6-2	Cell 7-1	Cell 7-2	Cell 11-1	Mean	SD	number	SEM							Cell 6-1	Cell 6-2	Cell 7-1	Cell 7-2	Cell 11-1	Mean	SD	number	SEM		T.Test (750 (1) vs 650)	T.Test (650 vs 750(2))
0	0.965762	0.965398	0.979646	0.973935	1.00005	0.976958	0.0142178	5	0.00710892																	0.011532	0.212658
0.166667	0.963814	0.943782	0.990473	0.991823	0.989736	0.975926	0.0214184	5	0.0107092
0.333333	0.974303	0.977694	0.996944	1.01502	1.01605	0.996002	0.0198149	5	0.00990746
0.5	0.988106	0.993952	1.00004	0.995671	0.990962	0.993746	0.0045531	5	0.00227655
0.666667	1.00262	1.01414	0.998702	1.00152	0.992051	1.00181	0.008026	5	0.004013
0.833333	0.992121	1.00266	1.02084	1.00935	0.9966	1.00431	0.0112847	5	0.00564237
1	1.00457	1.00625	1.02696	1.00864	1.01017	1.01132	0.0090053	5	0.00450265
1.16667	1.02265	1.03865	0.985934	0.987654	0.99807	1.00659	0.0231495	5	0.0115748
1.33333	1.02651	1.00555	1.00804	1.01268	0.98455	1.00747	0.0151575	5	0.00757877
1.5	1.01321	0.993247	1.02314	1.01751	0.971487	1.00372	0.0212486	5	0.0106243							1.01558	1.0016	1.00564	1.01204	0.987136	1.0044	0.0110767	5	0.00553837
1.66667	1.00702	1.00601	0.985732	1.00593	1.00537	1.00201	0.00912044	5	0.00456022
1.83333	0.994926	1.01861	1.00263	1.00429	0.992937	1.00268	0.0101416	5	0.00507081
2	1.00579	0.96479	0.996408	0.999225	0.989892	0.991221	0.0158397	5	0.00791987
2.16667	1.02135	1.02489	0.998598	0.979074	0.985635	1.00191	0.0206357	5	0.0103178
2.33333	1.02866	1.01489	0.9997	1.01054	0.995059	1.00977	0.0132425	5	0.00662126
2.5	1.01028	1.01944	0.995428	0.989313	1.01952	1.0068	0.0138636	5	0.00693179
2.66667	1.00563	1.02957	0.996837	0.996073	0.998581	1.00534	0.0140627	5	0.00703136
2.83333	0.991014	0.995666	1.0001	0.999088	1.01612	1.0004	0.00947942	5	0.00473971
3	1.00741	1.00136	0.999704	1.01024	1.04534	1.01281	0.0186871	5	0.00934357
3.16667	1.04823	1.0072	0.998955	1.02148	1.06718	1.02861	0.0285536	5	0.0142768
3.33333	1.10585	1.03411	1.02324	1.02025	1.05412	1.04751	0.0352099	5	0.0176049
3.5	1.11146	1.03364	1.04983	1.05064	1.0654	1.06219	0.0297452	5	0.0148726
3.66667	1.11872	1.05066	1.04718	1.0768	1.05101	1.06887	0.0302859	5	0.015143
3.83333	1.13077	1.01961	1.04388	1.0451	1.05189	1.05825	0.042344	5	0.021172
4	1.12729	1.00624	1.06322	1.07456	1.09368	1.073	0.0445254	5	0.0222627
4.16667	1.11476	1.021	1.07126	1.06687	1.08899	1.07258	0.0344357	5	0.0172179
4.33333	1.13827	1.01479	1.06511	1.06397	1.08373	1.07317	0.0444616	5	0.0222308
4.5	1.1214	1.04808	1.06863	1.06054	1.08539	1.07681	0.0283678	5	0.0141839							1.12367	1.02712	1.06925	1.05988	1.08787	1.07356	0.0356292	5	0.0178146
4.66667	1.11134	1.0185	1.07402	1.05514	1.09449	1.0707	0.0360401	5	0.01802
4.83333	1.14303	1.0362	1.08728	1.05498	1.11295	1.08689	0.0430659	5	0.021533
5	1.14678	1.03168	1.06246	1.06457	1.09747	1.08059	0.0437138	5	0.0218569
5.16667	1.12254	1.02854	1.08073	1.06343	1.09396	1.07784	0.0350158	5	0.0175079
5.33333	1.12727	1.0201	1.07267	1.04878	1.09535	1.07283	0.0413211	5	0.0206606
5.5	1.1985	1.06231	1.08705	1.05129	1.09955	1.09974	0.0584445	5	0.0292222
5.66667	1.20216	1.03765	1.08421	1.06948	1.11743	1.10219	0.062819	5	0.0314095
5.83333	1.20206	1.04711	1.07459	1.06545	1.1145	1.10074	0.0617666	5	0.0308833
6	1.1884	1.0464	1.07647	1.05488	1.08667	1.09056	0.0570296	5	0.0285148
6.16667	1.14875	1.0529	1.06502	1.06173	1.08659	1.083	0.0387868	5	0.0193934
6.33333	1.13587	1.0527	1.05305	1.04641	1.09045	1.0757	0.0378745	5	0.0189373
6.5	1.13849	1.04721	1.0722	1.05803	1.11818	1.08682	0.0395752	5	0.0197876
6.66667	1.12448	1.05428	1.06362	1.04957	1.08526	1.07544	0.0306515	5	0.0153258
6.83333	1.1399	1.04877	1.07659	1.04715	1.10061	1.0826	0.0388746	5	0.0194373
7	1.1506	1.0636	1.07916	1.05477	1.10599	1.09082	0.0386661	5	0.019333
7.16667	1.16085	1.06835	1.08923	1.04542	1.1296	1.09869	0.0465483	5	0.0232742
7.33333	1.1367	1.07024	1.06368	1.06853	1.09522	1.08687	0.0304279	5	0.015214
7.5	1.1407	1.0717	1.05833	1.05468	1.10201	1.08548	0.0360491	5	0.0180245							1.14297	1.07115	1.06394	1.05747	1.09814	1.08674	0.0350384	5	0.0175192
7.66667	1.1515	1.07151	1.06982	1.04921	1.0972	1.08785	0.0394458	5	0.0197229
7.83333	1.16135	1.09946	1.07206	1.05012	1.12369	1.10134	0.0435461	5	0.0217731
8	1.14627	1.09	1.0812	1.0372	1.09989	1.09091	0.039132	5	0.019566
8.16667	1.13954	1.06344	1.08441	1.04577	1.12755	1.09214	0.0404173	5	0.0202087
8.33333	1.1344	1.08534	1.07332	1.05083	1.12113	1.093	0.0343858	5	0.0171929
8.5	1.13003	1.07309	1.07646	1.05619	1.1257	1.09229	0.0334027	5	0.0167014
8.66667	1.14398	1.06339	1.07655	1.06183	1.11261	1.09167	0.0356848	5	0.0178424
8.83333	1.16927	1.05837	1.08147	1.05893	1.11901	1.09741	0.0471416	5	0.0235708
9	1.13235	1.06624	1.08582	1.08012	1.15069	1.10304	0.0364201	5	0.01821
9.16667	1.22508	1.08583	1.09026	1.06963	1.15927	1.12601	0.0651772	5	0.0325886
9.33333	1.21752	1.08087	1.09198	1.05888	1.15143	1.12014	0.0643231	5	0.0321615
9.5	1.20809	1.03511	1.10375	1.06695	1.16296	1.11537	0.070326	5	0.035163
9.66667	1.2506	1.07322	1.097	1.06324	1.16753	1.13032	0.0786165	5	0.0393083
9.83333	1.22675	1.08595	1.12214	1.07893	1.15513	1.13378	0.0602722	5	0.0301361
10	1.23925	1.09224	1.11477	1.06281	1.15082	1.13198	0.0680473	5	0.0340236
10.1667	1.24383	1.08513	1.10391	1.08425	1.18317	1.14006	0.0708265	5	0.0354132
10.3333	1.27056	1.09467	1.11478	1.0722	1.17724	1.14589	0.0799171	5	0.0399585
10.5	1.25436	1.06127	1.11223	1.06536	1.16809	1.13226	0.0807908	5	0.0403954							1.26302	1.07816	1.11289	1.07423	1.16949	1.13956	0.0788778	5	0.0394389
10.6667	1.26414	1.07855	1.11166	1.08513	1.16313	1.14052	0.0767045	5	0.0383523
10.8333	1.25542	1.07195	1.11916	1.07587	1.19607	1.14369	0.0799612	5	0.0399806
11	1.26097	1.06626	1.11852	1.08582	1.20122	1.14656	0.08216	5	0.04108
11.1667	1.27574	1.05327	1.11285	1.09187	1.20517	1.14778	0.0907545	5	0.0453773
11.3333	1.25864	1.08823	1.11927	1.11143	1.19992	1.1555	0.0713986	5	0.0356993
11.5	1.25934	1.10543	1.12979	1.06752	1.17296	1.14701	0.0735451	5	0.0367725
11.6667	1.25862	1.07824	1.13634	1.08029	1.17759	1.14622	0.0753052	5	0.0376526
11.8333	1.27697	1.08149	1.12456	1.08775	1.20149	1.15445	0.0835006	5	0.0417503
12	1.26752	1.10845	1.12813	1.08324	1.20713	1.15889	0.0763886	5	0.0381943
12.1667	1.2109	1.07665	1.10821	1.07679	1.16771	1.12805	0.0593722	5	0.0296861
12.3333	1.21043	1.1031	1.10426	1.07996	1.18894	1.13734	0.0582319	5	0.029116
12.5	1.2609	1.11098	1.11411	1.08616	1.1677	1.14797	0.0697813	5	0.0348906
12.6667	1.25046	1.07274	1.11608	1.07846	1.18762	1.14107	0.0763979	5	0.038199
12.8333	1.26411	1.067	1.1078	1.08126	1.1736	1.13875	0.0811491	5	0.0405746
13	1.26911	1.12883	1.10595	1.09269	1.17022	1.15336	0.0710855	5	0.0355428
13.1667	1.25489	1.10773	1.09816	1.09729	1.17654	1.14692	0.0687594	5	0.0343797
13.3333	1.25018	1.07788	1.10474	1.06928	1.17594	1.1356	0.0765477	5	0.0382738
13.5	1.24248	1.08102	1.09655	1.06362	1.18549	1.13383	0.0767817	5	0.0383908							1.24879	1.08438	1.10025	1.06754	1.18173	1.13654	0.0765527	5	0.0382763
13.6667	1.25371	1.09425	1.09946	1.06971	1.18377	1.14018	0.0766858	5	0.0383429
13.8333	1.25281	1.1106	1.11259	1.08025	1.19077	1.1494	0.0707941	5	0.0353971
14	1.25548	1.09744	1.1086	1.06684	1.16672	1.13902	0.074489	5	0.0372445
14.1667	1.2771	1.08923	1.09514	1.07797	1.17734	1.14336	0.0845164	5	0.0422582
14.3333	1.27035	1.08855	1.09025	1.08254	1.17506	1.14135	0.0816012	5	0.0408006
14.5	1.26418	1.1062	1.10007	1.08299	1.17443	1.14557	0.0748962	5	0.0374481
14.6667	1.24913	1.11656	1.09472	1.07901	1.17773	1.14343	0.0699885	5	0.0349943
14.8333	1.24668	1.09986	1.11263	1.08843	1.18581	1.14668	0.0675939	5	0.0337969
15	1.27187	1.11963	1.10952	1.08932	1.1886	1.15579	0.0748628	5	0.0374314
TRPV1 (F11)
Time (min)	Cell 8-1	Cell 8-2	Cell 10-1	Cell 12-1	Cell 12-2	Cell 12-3	Cell 12-4	Cell 12-5	Cell 13-1	Cell 13-2	Cell 13-3	Mean	SD	number	SEM	Cell 8-1	Cell 8-2	Cell 10-1	Cell 12-1	Cell 12-2	Cell 12-3	Cell 12-4	Cell 12-5	Cell 13-1	Cell 13-2	Cell 13-3	Mean	SD	number	SEM		T.Test (750 (1) vs 650)	T.Test (650 vs 750(2))
0	0.967901	0.935916	0.951738	0.888272	0.918691	0.900122	0.904729	0.928617	0.868687	1.03386	0.883193	0.925611	0.0467671	11	0.0147891																	5.56402e-07	0.000231517
0.166667	0.957546	0.974216	0.949747	0.959414	0.949026	0.95531	0.936617	0.961956	0.893777	0.994924	0.893182	0.947792	0.0307199	11	0.00971447
0.333333	0.958781	0.973556	0.958193	0.91827	0.941173	0.921367	0.920866	0.948444	0.877248	1.01463	0.91627	0.9408	0.0362373	11	0.0114592
0.5	1.00307	0.976861	0.964538	0.970029	0.960682	0.962456	0.931042	0.971575	0.912476	1.01533	0.927458	0.963229	0.0308282	11	0.00974873
0.666667	1.00259	0.997277	0.970576	0.938314	0.955648	0.948019	0.926759	0.972503	0.928845	1.01876	0.960235	0.965411	0.0305134	11	0.00964919
0.833333	0.981755	0.990262	0.98348	1.00659	0.985439	0.986822	0.943058	0.985879	0.941118	1.00498	0.931358	0.976431	0.025816	11	0.00816374
1	1.00152	1.00801	0.978988	0.970636	0.971149	0.976797	0.950027	0.979143	0.936045	1.02252	0.953513	0.977123	0.0258352	11	0.0081698
1.16667	1.01232	0.995371	0.977274	0.934354	0.960862	0.931197	0.933938	0.974651	0.952581	0.982621	0.995908	0.96828	0.0278763	11	0.00881526
1.33333	1.00388	0.998461	0.989289	1.00345	1.00471	0.996794	0.984676	1.00071	0.993335	0.993465	0.991992	0.996433	0.00650487	11	0.00205702
1.5	1.01359	0.998885	0.998953	0.976646	0.962821	0.98231	0.979783	0.988041	0.94467	0.982082	0.999874	0.984332	0.0191354	11	0.00605113	1.00806	1.00087	0.993119	1.00755	0.99203	1.00334	0.983226	0.99971	0.980735	0.993506	1.0063	0.997131	0.00942659	11	0.00298095
1.66667	1.00671	1.00525	0.991115	1.04255	1.00856	1.03093	0.985218	1.01038	1.0042	1.00497	1.02702	1.01063	0.0168768	11	0.0053369
1.83333	1.01084	1.01221	1.01	0.998487	1.03255	1.02168	1.01654	1.00219	1.00293	0.977502	1.03237	1.01066	0.015775	11	0.0049885
2	1.01747	1.0161	1.01907	0.99295	0.993589	1.00334	1.04094	1.00501	1.06974	0.973184	1.03682	1.01529	0.0266409	11	0.00842459
2.16667	1.02208	1.02587	1.03647	1.05816	1.04889	1.05419	1.05308	1.05236	1.08195	0.972337	1.04327	1.04079	0.027945	11	0.00883699
2.33333	1.02782	1.03419	1.00909	1.02846	1.0346	1.02628	1.07174	1.01257	1.0917	0.992592	1.05728	1.03512	0.0286444	11	0.00905815
2.5	0.999055	1.00303	1.04049	1.09404	1.07633	1.08483	1.09269	1.06727	1.11716	1.01415	1.10343	1.06295	0.0420282	11	0.0132905
2.66667	1.00707	1.03885	1.043	1.07987	1.08638	1.06658	1.12883	1.04822	1.07294	0.977373	1.05718	1.05512	0.0403592	11	0.0127627
2.83333	1.01028	0.998653	1.05517	1.04759	1.05908	1.05041	1.11505	1.04302	1.11546	1.0054	1.08703	1.05338	0.0401616	11	0.0127002
3	0.991392	0.992338	1.06557	1.11219	1.06291	1.11047	1.11568	1.09092	1.14227	1.0047	1.10184	1.07184	0.0535594	11	0.016937
3.16667	1.09348	1.11066	1.15241	1.15189	1.18204	1.10826	1.15314	1.15004	1.21535	1.08782	1.19125	1.14512	0.0413605	11	0.0130794
3.33333	1.11552	1.12023	1.14079	1.12613	1.23157	1.07458	1.16423	1.12923	1.23044	1.11193	1.21311	1.15071	0.0525383	11	0.0166141
3.5	1.11985	1.11126	1.16878	1.2375	1.25176	1.15469	1.19504	1.19255	1.18632	1.12075	1.19837	1.17608	0.0465489	11	0.0147201
3.66667	1.11651	1.11351	1.1757	1.21961	1.256	1.14534	1.20772	1.18948	1.22236	1.15009	1.22494	1.18375	0.047359	11	0.0149762
3.83333	1.15184	1.11049	1.19122	1.19529	1.29245	1.13657	1.22297	1.18066	1.22307	1.12833	1.27154	1.19131	0.0581886	11	0.0184009
4	1.15388	1.15271	1.16978	1.18839	1.25464	1.12796	1.22049	1.16453	1.28619	1.10938	1.2661	1.19037	0.058527	11	0.0185079
4.16667	1.16318	1.18663	1.2059	1.2974	1.31397	1.17714	1.22296	1.21268	1.29377	1.11273	1.27084	1.22338	0.0637723	11	0.0201666
4.33333	1.17787	1.17171	1.21622	1.28661	1.30643	1.17491	1.23785	1.20882	1.29463	1.13726	1.26713	1.2254	0.0572892	11	0.0181164
4.5	1.13562	1.15159	1.23497	1.25436	1.34184	1.16769	1.23608	1.19402	1.28885	1.15839	1.31065	1.22491	0.0694315	11	0.0219562	1.15245	1.16319	1.22491	1.25612	1.32255	1.17061	1.24129	1.19857	1.29016	1.13737	1.29104	1.22257	0.0630169	11	0.0199277
4.66667	1.14385	1.16628	1.22354	1.22738	1.31939	1.16924	1.24995	1.19288	1.28701	1.11647	1.29533	1.21739	0.0660664	11	0.020892
4.83333	1.17388	1.21539	1.25204	1.31619	1.38561	1.21021	1.24765	1.23555	1.30783	1.15732	1.30571	1.25522	0.0680465	11	0.0215182
5	1.14679	1.19121	1.24384	1.30888	1.37331	1.19149	1.26681	1.24872	1.34184	1.1868	1.3005	1.25456	0.0716076	11	0.0226443
5.16667	1.15621	1.17999	1.24489	1.28891	1.38353	1.18508	1.27749	1.21401	1.39106	1.15387	1.33774	1.25571	0.0870706	11	0.0275341
5.33333	1.15483	1.16186	1.24731	1.25797	1.38088	1.18572	1.3009	1.1998	1.38539	1.17107	1.34489	1.25369	0.0875692	11	0.0276918
5.5	1.12341	1.185	1.28219	1.3471	1.4264	1.25201	1.30186	1.2772	1.35923	1.17841	1.34265	1.27959	0.0901531	11	0.0285089
5.66667	1.14757	1.18067	1.29897	1.3515	1.4268	1.24272	1.29402	1.25805	1.34343	1.1718	1.33227	1.27707	0.0865235	11	0.0273611
5.83333	1.15945	1.19369	1.30557	1.34929	1.44452	1.22311	1.31497	1.2577	1.36727	1.20934	1.36947	1.2904	0.088817	11	0.0280864
6	1.15697	1.20449	1.3125	1.31738	1.4346	1.21406	1.31294	1.22708	1.44062	1.21608	1.38853	1.2932	0.097556	11	0.0308499
6.16667	1.17608	1.17054	1.25433	1.32446	1.40488	1.20326	1.32643	1.22835	1.40495	1.17342	1.33388	1.27278	0.0900141	11	0.028465
6.33333	1.15626	1.17928	1.23152	1.41375	1.49984	1.27056	1.34523	1.28492	1.38937	1.12896	1.29529	1.29045	0.114978	11	0.0363593
6.5	1.14583	1.18147	1.25447	1.38618	1.37828	1.24264	1.32045	1.23407	1.45363	1.1925	1.39199	1.28923	0.101904	11	0.032225
6.66667	1.12457	1.17858	1.26383	1.34577	1.33033	1.24111	1.29562	1.18161	1.43998	1.14987	1.42234	1.27033	0.107127	11	0.0338764
6.83333	1.16238	1.17328	1.29064	1.32007	1.3622	1.2221	1.31478	1.1918	1.41376	1.11032	1.39273	1.26855	0.101975	11	0.0322474
7	1.15984	1.15615	1.28289	1.38451	1.37137	1.31988	1.34439	1.24974	1.4715	1.18688	1.42259	1.30452	0.107131	11	0.0338777
7.16667	1.14388	1.20844	1.30148	1.37007	1.38647	1.30267	1.3184	1.2456	1.45261	1.21359	1.42835	1.30651	0.0975784	11	0.030857
7.33333	1.15448	1.19079	1.31195	1.35355	1.36792	1.29702	1.31447	1.23264	1.4227	1.23683	1.44955	1.3029	0.0931668	11	0.0294619
7.5	1.16055	1.21574	1.30136	1.32521	1.42327	1.2666	1.30387	1.23499	1.47463	1.25121	1.46848	1.31145	0.103709	11	0.0327958	1.16344	1.20376	1.30758	1.32669	1.39048	1.27245	1.31412	1.22711	1.45869	1.23703	1.44588	1.30429	0.0966238	11	0.0305551
7.66667	1.1753	1.20476	1.30943	1.3013	1.38024	1.25374	1.32401	1.2137	1.47875	1.22306	1.4196	1.29854	0.0966777	11	0.0305722
7.83333	1.17463	1.22066	1.33841	1.37004	1.42436	1.35268	1.36552	1.26628	1.51794	1.2204	1.46604	1.33791	0.108472	11	0.0343019
8	1.17921	1.21899	1.34483	1.34739	1.39192	1.33909	1.37826	1.26609	1.53058	1.248	1.4744	1.33807	0.106304	11	0.0336162
8.16667	1.18482	1.1813	1.35319	1.31795	1.39909	1.31757	1.36339	1.23527	1.50428	1.24311	1.48106	1.32555	0.109276	11	0.0345562
8.33333	1.1788	1.1973	1.35564	1.2983	1.39734	1.30295	1.38301	1.21389	1.52952	1.26699	1.51092	1.33042	0.118406	11	0.0374432
8.5	1.17968	1.2514	1.34902	1.28892	1.42377	1.27065	1.37022	1.22867	1.51711	1.28252	1.52196	1.3349	0.113522	11	0.0358989
8.66667	1.17801	1.23583	1.35422	1.27011	1.40316	1.27688	1.37628	1.20951	1.52247	1.26943	1.50798	1.32763	0.115458	11	0.0365109
8.83333	1.17757	1.21972	1.36638	1.33242	1.45354	1.39681	1.39661	1.26336	1.57662	1.26873	1.52934	1.36192	0.125871	11	0.0398039
9	1.16505	1.23776	1.36802	1.32378	1.43167	1.36788	1.38633	1.25435	1.48605	1.26167	1.44291	1.33868	0.0994029	11	0.0314339
9.16667	1.17576	1.2709	1.48249	1.34942	1.56152	1.33892	1.37632	1.34181	1.5851	1.24427	1.54377	1.38821	0.137016	11	0.0433282
9.33333	1.18746	1.29603	1.51755	1.33963	1.5967	1.34031	1.38954	1.33726	1.51265	1.25251	1.54394	1.39214	0.131996	11	0.0417406
9.5	1.16681	1.29972	1.52025	1.34234	1.57632	1.33083	1.3884	1.3426	1.60565	1.26734	1.53586	1.39783	0.141357	11	0.044701
9.66667	1.15713	1.28629	1.50468	1.31215	1.57541	1.33025	1.39145	1.34115	1.60447	1.29318	1.5333	1.39359	0.141526	11	0.0447545
9.83333	1.16498	1.29055	1.49566	1.38401	1.63273	1.42978	1.45784	1.37474	1.56213	1.32578	1.55256	1.42461	0.135668	11	0.042902
10	1.20319	1.25395	1.52133	1.38137	1.6015	1.38159	1.41874	1.36107	1.53184	1.23249	1.55949	1.40423	0.13734	11	0.0434306
10.1667	1.20137	1.27131	1.53755	1.35109	1.59638	1.35536	1.42051	1.37828	1.60217	1.30098	1.5489	1.4149	0.137544	11	0.0434953
10.3333	1.22853	1.29226	1.55283	1.33814	1.64065	1.35641	1.44013	1.37395	1.61134	1.29622	1.55236	1.42571	0.142011	11	0.0449079
10.5	1.213	1.33699	1.55872	1.33557	1.62065	1.32969	1.44986	1.37954	1.59559	1.30927	1.59042	1.42903	0.140818	11	0.0445304	1.20786	1.3099	1.56704	1.33236	1.63354	1.33283	1.44641	1.37761	1.60575	1.30107	1.57888	1.57888	0.146807	11	0.0464243
10.6667	1.18206	1.30046	1.58956	1.32338	1.63933	1.31239	1.44923	1.37933	1.61033	1.29771	1.59386	1.42524	0.158837	11	0.0502286
10.8333	1.20002	1.32085	1.57092	1.4036	1.66241	1.44663	1.53322	1.41745	1.62821	1.31651	1.56516	1.46045	0.145154	11	0.0459018
11	1.21369	1.26564	1.5961	1.40074	1.63747	1.43223	1.50449	1.41328	1.58632	1.35384	1.60155	1.45503	0.142794	11	0.0451553
11.1667	1.22091	1.27238	1.59188	1.38573	1.63127	1.40052	1.48268	1.42597	1.61332	1.33211	1.64085	1.45433	0.149008	11	0.0471204
11.3333	1.19953	1.28986	1.59544	1.34767	1.65239	1.3812	1.48573	1.39549	1.61872	1.3728	1.58376	1.44751	0.149063	11	0.0471378
11.5	1.19354	1.30059	1.61949	1.34691	1.66052	1.3764	1.47719	1.38461	1.68024	1.33152	1.59166	1.45115	0.164104	11	0.0518942
11.6667	1.20007	1.3085	1.63028	1.31522	1.65663	1.35714	1.46641	1.38322	1.60437	1.28532	1.61028	1.43795	0.162556	11	0.0514046
11.8333	1.1766	1.31217	1.63899	1.31384	1.66693	1.34705	1.4804	1.39553	1.65078	1.29687	1.63528	1.44677	0.175364	11	0.0554549
12	1.15569	1.28733	1.63817	1.3906	1.70229	1.45201	1.61024	1.44373	1.63279	1.39165	1.64256	1.4861	0.173479	11	0.054859
12.1667	1.20221	1.33642	1.6028	1.36802	1.62865	1.45095	1.59421	1.3782	1.61481	1.35048	1.65751	1.4713	0.15407	11	0.0487212
12.3333	1.17667	1.28201	1.57511	1.31267	1.63264	1.43711	1.59399	1.36579	1.59286	1.36975	1.59773	1.44876	0.157304	11	0.049744
12.5	1.16852	1.27077	1.5934	1.31388	1.62105	1.4171	1.58491	1.36386	1.62639	1.33654	1.67476	1.45193	0.173456	11	0.0548517
12.6667	1.16544	1.25879	1.57718	1.30158	1.62709	1.40882	1.55796	1.34681	1.68926	1.32601	1.68761	1.44969	0.184438	11	0.0583246
12.8333	1.16212	1.24268	1.6012	1.2804	1.61881	1.40902	1.54813	1.34104	1.62003	1.32332	1.68925	1.43964	0.181708	11	0.057461
13	1.16208	1.2138	1.61484	1.28979	1.61096	1.40351	1.54323	1.32472	1.63558	1.3922	1.664	1.44134	0.180758	11	0.0571608
13.1667	1.16967	1.24087	1.62371	1.33678	1.64233	1.52417	1.67499	1.38156	1.68534	1.33286	1.64299	1.47775	0.189998	11	0.0600825
13.3333	1.19182	1.23864	1.61387	1.33089	1.68805	1.50679	1.64724	1.38374	1.66267	1.32134	1.65004	1.47592	0.187074	11	0.059158
13.5	1.17846	1.20718	1.60528	1.3107	1.66431	1.47646	1.60944	1.37473	1.67886	1.30156	1.67827	1.4623	0.194623	11	0.0615454	1.18256	1.21824	1.60463	1.31647	1.666	1.48009	1.61326	1.37513	1.65939	1.3321	1.67551	1.67551	0.187794	11	0.0593857
13.6667	1.17739	1.20889	1.59474	1.30783	1.64564	1.45701	1.5831	1.36693	1.63664	1.3734	1.69822	1.45907	0.183838	11	0.0581345
13.8333	1.18649	1.2104	1.64653	1.30883	1.64254	1.44872	1.58948	1.37163	1.70747	1.37877	1.67399	1.46953	0.191157	11	0.060449
14	1.20744	1.19019	1.6387	1.28748	1.60967	1.44461	1.59646	1.34718	1.68706	1.36743	1.68683	1.46028	0.190747	11	0.0603196
14.1667	1.19753	1.19604	1.64554	1.34958	1.71515	1.57483	1.70957	1.41076	1.66594	1.38117	1.65333	1.49995	0.199155	11	0.0629783
14.3333	1.17243	1.19742	1.65477	1.38888	1.6879	1.55085	1.70337	1.41069	1.71825	1.41563	1.67665	1.50699	0.201942	11	0.0638597
14.5	1.20823	1.19003	1.67957	1.39644	1.71836	1.5617	1.71078	1.3853	1.68131	1.42686	1.70379	1.51476	0.202635	11	0.0640788
14.6667	1.20437	1.20062	1.66322	1.40865	1.67102	1.54925	1.68777	1.41226	1.67951	1.43328	1.69243	1.50931	0.189576	11	0.0599493
14.8333	1.20429	1.18663	1.68565	1.41248	1.66172	1.53452	1.6692	1.4448	1.6958	1.46642	1.68947	1.51373	0.189759	11	0.0600069
15	1.21762	1.17511	1.70154	1.39392	1.70071	1.51026	1.64657	1.4234	1.71531	1.47882	1.71892	1.51656	0.199153	11	0.0629777
