# Supplementary material for: Genetic code expansion, click chemistry, and light-activated PI3K reveal details of membrane protein trafficking downstream of receptor tyrosine kinases
Source: eLife. 2024 Aug 20;12:RP91012. doi: 10.7554/eLife.91012 (PMC11335347; doi:10.7554/eLife.91012)
Supplement: Figure 2—figure supplement 2—source data 1. [file elife-91012-fig2-figsupp2-data1.xlsx]

## Sheet: Sheet1
Time	Cell 1_1	Cell 2_1	Cell 3_1	Cell 3_2	Cell 4_1	Cell 4_2	Cell 6_1		Mean	SD	Count	SEM	Time (min)	Cell 1_1	Cell 2_1	Cell 3_1	Cell 3_2	Cell 4_1	Cell 4_2	Cell 6_1	Mean	SD	number	SEM		T.Test (750 (1) vs 650)	T.Test (650 vs 750(2))			Cell 1_1	Cell 2_1	Cell 3_1	Cell 3_2	Cell 4_1	Cell 4_2	Cell 6_1
0	0.965444	0.982764	1.0182	1.02171	0.908503	0.886884	0.941028		0.960648	0.0517978	7	0.0211464	0													0.00289658	0.0162721			0.993123	1.01094	0.988068	0.972626	0.980042	0.99422	1.0069
10	0.995458	0.978966	0.925076	0.930186	0.908516	0.918388	0.965808		0.946057	0.0336168	7	0.013724	0.166667																	1.22192	1.36883	1.37092	1.71713	1.91132	1.73812	1.24079
20	1.01067	0.960613	0.939967	0.926892	0.92406	0.963756	0.94635		0.953187	0.029531	7	0.012056	0.333333																	1.09743	1.27729	1.22866	1.0892	1.46775	1.46823	1.13841
30	0.991281	0.983344	0.920278	0.903741	0.940155	0.955626	0.978221		0.953235	0.033394	7	0.0136331	0.5
40	1.00046	0.976588	0.93263	0.901832	0.91616	0.963101	0.947861		0.948376	0.0345878	7	0.0141204	0.666667
50	0.993922	0.987814	1.00384	0.842666	0.976345	0.970759	0.967107		0.963208	0.0547341	7	0.0223451	0.833333
60	0.984619	1.00454	1.08381	0.890452	0.94464	0.9634	0.998937		0.981485	0.059565	7	0.0243173	1
70	1.02352	1.03704	1.00795	0.98433	0.991651	1.04507	0.984152		1.01053	0.0251987	7	0.0102873	1.16667
80	0.97671	0.996309	1.00298	0.937402	0.978305	0.925141	1.02514		0.977427	0.0356444	7	0.0145518	1.33333
90	1.00108	1.0232	0.959765	0.875886	0.993711	1.00224	0.995376		0.978751	0.0491052	7	0.0200471	1.5	0.993123	1.01094	0.988068	0.972626	0.980042	0.99422	1.0069	0.992274	0.0136629	7	0.00557787
100	1.00158	1.01331	1.00146	1.10459	0.96811	1.05528	1.00017		1.02064	0.0451125	7	0.0184171	1.66667
110	0.984928	0.990403	0.9678	1.00718	1.01261	1.02632	1.00515		0.999199	0.0194998	7	0.00796074	1.83333
120	1.00665	1.02301	1.04433	1.04791	1.0056	1.06508	1.00923		1.02883	0.0236924	7	0.00967238	2
130	1.03332	1.02435	1.04818	1.04184	1.03091	1.03984	1.00574		1.03203	0.0139709	7	0.0057036	2.16667
140	1.02548	0.999602	0.980106	1.11593	1.05037	0.984517	1.02169		1.02538	0.0469423	7	0.0191641	2.33333
150	1.03066	0.991705	0.988414	1.17503	1.06528	0.979597	1.02172		1.03606	0.0681014	7	0.0278023	2.5
160	0.997013	0.99977	1.11385	1.11947	1.04265	1.06046	1.05599		1.0556	0.0486712	7	0.01987	2.66667
170	0.994085	1.05377	1.07604	1.14888	1.11082	1.0452	1.02561		1.06491	0.0522108	7	0.021315	2.83333
180	1.02259	1.03483	1.01126	1.03409	1.16138	1.06984	1.04652		1.05436	0.0506847	7	0.0206919	3
190	1.16804	1.24822	1.22639	1.64719	1.67937	1.39354	1.19539		1.36545	0.215903	7	0.0881419	3.16667
200	1.21414	1.26124	1.36968	1.66303	1.73938	1.38521	1.2045		1.40531	0.214989	7	0.0877691	3.33333
210	1.15924	1.28652	1.30379	1.76732	1.83124	1.48235	1.1879		1.43119	0.272625	7	0.111299	3.5
220	1.17942	1.30664	1.24595	1.82201	1.92521	1.54051	1.20537		1.46073	0.307367	7	0.125482	3.66667
230	1.17218	1.29757	1.39252	1.75355	1.8352	1.692	1.21887		1.48027	0.273805	7	0.11178	3.83333
240	1.20462	1.34457	1.30023	1.62172	1.89079	1.63821	1.22005		1.46003	0.259852	7	0.106084	4
250	1.19939	1.33293	1.40139	1.64673	1.91612	1.71542	1.21392		1.48941	0.273907	7	0.111822	4.16667
260	1.2148	1.31941	1.39619	1.75121	1.97028	1.68734	1.23371		1.51042	0.292758	7	0.119518	4.33333
270	1.23863	1.39159	1.36942	1.70722	1.84479	1.66049	1.25031		1.49464	0.24043	7	0.0981551	4.5	1.22192	1.36883	1.37092	1.71713	1.91132	1.73812	1.24079	1.50986	0.274084	7	0.111894
280	1.21234	1.39548	1.34716	1.69296	1.91889	1.86652	1.23835		1.52453	0.296738	7	0.121143	4.66667
290	1.2383	1.39675	1.43053	1.76164	1.95305	1.8891	1.24089		1.55861	0.303363	7	0.123848	4.83333
300	1.21377	1.37131	1.35559	1.75942	1.9965	1.90874	1.22943		1.54782	0.331014	7	0.135136	5
310	1.19655	1.42704	1.49601	1.7866	2.02445	1.87178	1.26338		1.58083	0.317039	7	0.129431	5.16667
320	1.20935	1.39251	1.39187	1.67621	2.07533	1.84385	1.25157		1.54867	0.324845	7	0.132618	5.33333
330	1.19974	1.40517	1.43581	1.772	2.11973	1.93762	1.26526		1.59076	0.353617	7	0.144363	5.5
340	1.18978	1.4409	1.337	1.63984	2.03097	2.05248	1.23346		1.56063	0.360168	7	0.147038	5.66667
350	1.23981	1.42483	1.43572	1.71218	2.08136	2.10823	1.24469		1.60669	0.368766	7	0.150548	5.83333
360	1.22833	1.51466	1.39019	1.62837	2.08624	2.00214	1.27447		1.5892	0.339987	7	0.138799	6
370	1.13175	1.36084	1.3197	1.42499	1.79871	1.90866	1.17717		1.44597	0.298085	7	0.121693	6.16667
380	1.09435	1.32531	1.20606	1.31268	1.52985	1.77831	1.12839		1.33928	0.242274	7	0.0989079	6.33333
390	1.07994	1.23966	1.21455	1.3046	1.4617	1.69207	1.12136		1.30198	0.21258	7	0.0867853	6.5
400	1.06738	1.25156	1.26495	1.18637	1.45231	1.61938	1.11851		1.28007	0.194061	7	0.079225	6.66667
410	1.08969	1.26399	1.28819	1.1061	1.46821	1.50322	1.1111		1.2615	0.17232	7	0.0703492	6.83333
420	1.08497	1.2903	1.22657	1.13953	1.43715	1.54585	1.13752		1.26598	0.170796	7	0.0697271	7
430	1.09235	1.24043	1.13414	1.17972	1.46888	1.49998	1.14932		1.25212	0.165233	7	0.067456	7.16667
440	1.08418	1.28829	1.15368	1.14493	1.40677	1.4963	1.14774		1.24598	0.155384	7	0.0634351	7.33333
450	1.09653	1.27005	1.24548	1.018	1.49816	1.47818	1.12979		1.24803	0.185235	7	0.0756219	7.5	1.09743	1.27729	1.22866	1.0892	1.46775	1.46823	1.13841	1.25242	0.162165	7	0.0662035
460	1.11158	1.27353	1.28682	1.10466	1.49831	1.43021	1.1377		1.26326	0.156901	7	0.0640545	7.66667
470	1.12191	1.27876	1.1848	1.12001	1.55238	1.45303	1.15571		1.26666	0.172233	7	0.0703139	7.83333
480	1.12649	1.2453	1.18584	1.02919	1.4752	1.42063	1.14792		1.23294	0.161432	7	0.0659045	8
490	1.09442	1.26524	1.28095	1.19132	1.53971	1.4325	1.14043		1.2778	0.159517	7	0.0651226	8.16667
500	1.07692	1.29157	1.16677	1.06019	1.49211	1.45709	1.13858		1.24046	0.176975	7	0.0722497	8.33333
510	1.07982	1.24482	1.23073	1.06126	1.58546	1.45363	1.13382		1.25565	0.196747	7	0.0803214	8.5
520	1.06962	1.2501	1.26418	1.21584	1.48834	1.4314	1.16951		1.26986	0.14568	7	0.0594736	8.66667
530	1.08925	1.30708	1.24898	1.29038	1.53904	1.44865	1.1638		1.29817	0.155416	7	0.0634484	8.83333
540	1.10467	1.31917	1.1835	1.36404	1.6166	1.55354	1.16288		1.3292	0.197293	7	0.0805444	9
550	1.24255	1.59177	1.44228	1.86462	2.07168	1.75571	1.29151		1.60859	0.306625	7	0.125179	9.16667
560	1.20859	1.57677	1.55058	1.93904	2.22109	1.8214	1.35263		1.66716	0.350125	7	0.142938	9.33333
570	1.21762	1.61316	1.54893	1.95438	2.46242	1.88966	1.34878		1.71928	0.42146	7	0.17206	9.5
580	1.24582	1.65404	1.52191	2.13306	2.36673	1.97627	1.36306		1.75156	0.417018	7	0.170247	9.66667
590	1.26417	1.69425	1.57557	2.10903	2.37459	2.03243	1.40266		1.77896	0.404788	7	0.165254	9.83333
600	1.25699	1.72073	1.65477	2.02332	2.35684	2.20597	1.37972		1.79976	0.413042	7	0.168624	10
610	1.268	1.74792	1.64244	1.99502	2.33814	2.15557	1.38163		1.78982	0.395585	7	0.161497	10.1667
620	1.27127	1.76278	1.67598	1.94355	2.36896	2.22623	1.36322		1.80171	0.410908	7	0.167752	10.3333
630	1.28507	1.71168	1.5984	2.10023	2.41039	2.34474	1.34456		1.82787	0.460985	7	0.188196	10.5
640	1.29128	1.72538	1.75091	2.00742	2.47624	2.32198	1.40053		1.85339	0.443318	7	0.180984	10.6667
650	1.24662	1.74315	1.65893	1.94146	2.46486	2.29891	1.37525		1.81845	0.45062	7	0.183965	10.8333
660	1.21418	1.72673	1.66954	2.03283	2.43828	2.45403	1.38866		1.84632	0.484617	7	0.197844	11
670	1.24666	1.75862	1.75298	1.90581	2.41017	2.43445	1.40365		1.84462	0.454477	7	0.185539	11.1667
680	1.26179	1.80888	1.55453	2.10023	2.51033	2.46404	1.39365		1.87049	0.502659	7	0.20521	11.3333
690	1.27448	1.77404	1.7141	2.0386	2.49546	2.56734	1.39309		1.89387	0.502912	7	0.205313	11.5
700	1.30808	1.77892	1.70698	2.03004	2.48616	2.55272	1.40712		1.89572	0.488471	7	0.199418	11.6667
710	1.25701	1.77326	1.73708	2.00331	2.51671	2.5797	1.38205		1.89273	0.512663	7	0.209294	11.8333
720	1.32928	1.8016	1.81006	2.18883	2.58468	2.58219	1.37685		1.95336	0.518788	7	0.211794	12
730	1.18971	1.60913	1.60024	1.6179	2.18618	2.36889	1.2512		1.68904	0.441533	7	0.180255	12.1667
740	1.1868	1.61238	1.44213	1.50445	1.996	2.32067	1.20824		1.6101	0.415107	7	0.169467	12.3333
750	1.19176	1.53325	1.49885	1.42538	1.8561	2.11903	1.24524		1.5528	0.330928	7	0.135101	12.5
760	1.15771	1.55904	1.42296	1.27968	1.86148	2.10391	1.19723		1.51172	0.356185	7	0.145412	12.6667
770	1.16447	1.50528	1.48776	1.47274	1.79171	1.93952	1.20065		1.50888	0.283088	7	0.11557	12.8333
780	1.16986	1.47141	1.47088	1.30277	1.78343	2.01095	1.23539		1.4921	0.305653	7	0.124782	13
790	1.17245	1.5136	1.36981	1.48228	1.78787	1.95435	1.18394		1.4949	0.292618	7	0.119461	13.1667
800	1.16083	1.49765	1.39169	1.36721	1.81535	1.99819	1.17949		1.4872	0.314543	7	0.128412	13.3333
810	1.17285	1.49751	1.41322	1.37396	1.74464	1.93776	1.22317		1.48044	0.275648	7	0.112533	13.5
820	1.15577	1.52724	1.35483	1.24753	1.80906	1.87593	1.20925		1.45423	0.291766	7	0.119113	13.6667
830	1.14653	1.51643	1.41141	1.36021	1.8008	1.92298	1.208		1.48091	0.29003	7	0.118404	13.8333
840	1.15778	1.52715	1.56718	1.31966	1.73143	1.86879	1.18363		1.47937	0.271283	7	0.110751	14
850	1.15151	1.50203	1.519	1.28775	1.80872	1.83996	1.17286		1.46883	0.282242	7	0.115225	14.1667
860	1.15118	1.50881	1.51802	1.28307	1.82921	1.77874	1.18862		1.46538	0.271962	7	0.111028	14.3333
870	1.14643	1.50882	1.44808	1.29432	1.83066	1.92212	1.18932		1.47711	0.302893	7	0.123655	14.5
880	1.14867	1.52756	1.50878	1.1428	1.79565	1.92291	1.20479		1.46445	0.315285	7	0.128714	14.6667
890	1.20948	1.51453	1.39606	1.4404	1.87912	1.81796	1.2086		1.49516	0.267254	7	0.109106	14.8333
900	1.1781	1.53565	1.42817	1.27961	1.82541	1.91504	1.16701		1.47557	0.300964	7	0.122868	15
