# Supplementary material for: Genetic code expansion, click chemistry, and light-activated PI3K reveal details of membrane protein trafficking downstream of receptor tyrosine kinases
Source: eLife. 2024 Aug 20;12:RP91012. doi: 10.7554/eLife.91012 (PMC11335347; doi:10.7554/eLife.91012)
Supplement: Figure 2—figure supplement 3—source data 1. [file elife-91012-fig2-figsupp3-data1.xlsx]

## Sheet: Sheet1
TRPM4 (HEK)																								Mean (3 points in the middle)
Time (min)	Cell 1_1	Cell 1_2	Cell 1_3	Cell 2-1	Cell 2-2	Cell 2-3	Cell 2-4	Cell 16-1	Cell 16-2	Cell 16-3	Cell 16-4	Cell 16-5	Cell 17-1	Cell 17-2	Cell 17-3	Cell 17-4	Cell 17-5		Mean	SD	number	SEM		Cell 1_1	Cell 1_2	Cell 1_3	Cell 2-1	Cell 2-2	Cell 2-3	Cell 2-4	Cell 16-1	Cell 16-2	Cell 16-3	Cell 16-4	Cell 16-5	Cell 17-1	Cell 17-2	Cell 17-3	Cell 17-4	Cell 17-5		Mean	SD	number	SEM		T.Test (750 (1) vs 650)	T.Test (650 vs 750(2))
0	0.985467	1.04847	1.02165	0.943783	0.98495	0.962048	0.978452	1.04294	1.07096	1.08337	1.055	1.1526	0.990737	1.00771	1.05501	1.02549	1.03426		1.02605	0.051185	17	0.0127962																									1.20879e-06	0.000536493
0.166667	0.985649	1.00454	1.04191	0.985618	0.964589	0.968732	0.975986	1.00383	1.0226	1.03765	0.966035	1.02572	1.00656	1.02057	1.01628	0.992928	0.954107		0.99843	0.0269278	17	0.00673195
0.333333	0.959916	0.991775	0.984249	0.990753	0.986184	0.991441	0.994638	0.983308	0.983575	0.981752	0.949624	1.02179	0.98987	0.987112	1.04019	0.975762	1.00155		0.989029	0.0203445	17	0.00508613
0.5	0.982173	1.02551	0.971949	0.988325	0.978584	0.983735	0.987546	0.999724	0.998552	0.991014	0.944339	0.967758	0.996334	0.992264	1.02994	0.980743	1.01078		0.989957	0.0205133	17	0.00512833
0.666667	0.988611	0.982232	1.03015	0.996856	0.991289	1.00466	1.00091	0.987458	0.983665	0.981855	0.973989	1.00984	0.986083	1.00114	1.01664	0.942819	0.979575		0.991634	0.0192975	17	0.00482438
0.833333	0.992223	0.985277	0.978524	0.982084	0.989305	1.00229	0.969144	0.995255	0.999546	1.00886	0.949779	0.929283	0.980448	0.996841	1.00857	0.987409	0.94693		0.982457	0.0223106	17	0.00557765
1	1.00057	0.98715	1.01393	0.976144	0.987011	0.993176	0.976682	0.991551	1.00728	0.993956	0.978877	0.971544	0.996336	1.01484	1.01846	0.978951	0.980471		0.992172	0.014709	17	0.00367725
1.16667	0.987416	1.01102	1.00347	1.0084	0.980575	1.00315	1.01595	1.00466	1.0085	1.00888	0.995415	1.00256	0.982742	1.00468	1.02724	0.94539	0.981861		0.998348	0.0185928	17	0.0046482
1.33333	1.01277	0.974358	1.00123	1.00373	1.00317	0.987312	1.03244	1.00723	1.00338	0.985097	0.96731	0.932281	0.974645	1.00861	1.00397	0.959746	1.0351		0.993669	0.026105	17	0.00652625
1.5	0.993322	1.00612	1.01699	1.01229	1.02054	1.01163	1.01677	1.00064	0.987994	0.989662	1.00247	0.963377	0.984977	1.00127	1.0331	0.988185	0.997779		1.0016	0.0165512	17	0.00413781		1.00107	0.993445	1.00584	1.0066	1.00668	0.995855	1.0146	0.99937	0.996132	0.986058	0.977336	0.953115	0.990237	1.00032	1.00042	0.989607	1.01818		0.996168	0.0150059	17	0.00375147
1.66667	0.997122	0.999857	0.999311	1.00378	0.996325	0.988623	0.994585	0.990239	0.997022	0.983415	0.962229	0.963687	1.01109	0.991067	0.964195	1.02089	1.02166		0.993241	0.0175598	17	0.00438994
1.83333	1.00352	1.00173	1.03042	1.01028	0.997035	1.01304	1.00953	1.00746	0.994372	0.990021	1.00371	0.951035	1.01635	0.974	0.933891	1.01973	1.02437		0.998853	0.025235	17	0.00630874
2	1.00956	1.01451	1.02815	0.995096	1.01773	0.998958	0.994935	1.01379	0.982777	0.983206	1.02647	1.01445	1.01508	0.991616	0.986663	1.08308	1.01956		1.01033	0.0238272	17	0.0059568
2.16667	1.00643	0.998222	1.00093	1.01122	1.03052	1.01862	0.98558	0.989466	0.966444	0.9612	0.994905	0.994174	1.02227	1.02226	1.01474	1.03163	1.02335		1.00423	0.0207808	17	0.0051952
2.33333	1.02676	1.01003	1.02925	1.02646	1.00481	1.01	0.987744	0.977583	0.983248	1.02293	0.994067	0.974588	1.01426	0.990436	0.991309	1.00271	1.02211		1.00402	0.0180759	17	0.00451898
2.5	1.01839	1.00353	0.993916	1.01897	1.03043	1.0008	1.02899	0.984003	0.973355	0.992677	1.03857	0.983705	1.00627	1.01935	0.978392	1.00169	1.01237		1.00502	0.0191942	17	0.00479854
2.66667	1.01967	1.01356	0.974141	1.01922	1.00683	1.01484	1.00835	0.997687	0.964256	1.00596	1.02286	0.974431	1.00983	0.987248	0.954289	1.03053	0.999612		1.00019	0.0219668	17	0.0054917
2.83333	1.01474	1.01179	1.01276	1.03381	1.02957	1.00834	1.00144	1.009	0.998259	0.976057	1.03387	1.02759	1.00757	0.99069	0.94857	1.02511	1.01094		1.00824	0.0217348	17	0.0054337
3	1.02669	1.00874	0.983571	1.02491	0.990504	1.031	1.03112	1.05039	1.05448	1.03326	1.13518	1.14394	1.02421	0.994311	0.96003	1.04847	0.996411		1.0316	0.0480275	17	0.0120069
3.16667	1.01891	0.998757	1.02637	1.08748	1.08683	1.07365	1.10538	1.10254	1.08347	1.06468	1.16219	1.23254	1.09022	1.09215	1.08024	1.09221	1.09138		1.08759	0.0526343	17	0.0131586
3.33333	1.07482	1.08782	1.07317	1.10755	1.08062	1.07601	1.13414	1.1203	1.11835	1.08812	1.22223	1.2931	1.10441	1.09606	1.13842	1.1291	1.13936		1.12256	0.0570339	17	0.0142585
3.5	1.08406	1.1343	1.13793	1.12038	1.15637	1.09077	1.14795	1.15874	1.13325	1.0604	1.22728	1.36515	1.12347	1.1097	1.14323	1.14934	1.14979		1.14659	0.0670795	17	0.0167699
3.66667	1.11243	1.15985	1.16199	1.11846	1.16234	1.08615	1.1149	1.1765	1.14688	1.10051	1.26249	1.39137	1.12648	1.12718	1.1961	1.20821	1.21179		1.16845	0.0736556	17	0.0184139
3.83333	1.10417	1.16058	1.13058	1.14047	1.12811	1.12252	1.1566	1.19168	1.18412	1.12524	1.26308	1.42844	1.11507	1.10902	1.13634	1.19582	1.1523		1.1673	0.0782185	17	0.0195546
4	1.12174	1.20133	1.1508	1.13494	1.15771	1.10838	1.17061	1.188	1.17011	1.10362	1.30042	1.3998	1.11899	1.12347	1.191	1.1755	1.17032		1.17569	0.074201	17	0.0185502
4.16667	1.13165	1.19395	1.16608	1.15043	1.14565	1.1242	1.19329	1.19355	1.20562	1.1294	1.32078	1.4303	1.12894	1.13597	1.17702	1.21866	1.17455		1.18941	0.0784667	17	0.0196167
4.33333	1.13307	1.22335	1.14911	1.13456	1.18582	1.11855	1.16129	1.21557	1.22472	1.13461	1.3208	1.46664	1.11317	1.10598	1.13655	1.20227	1.13787		1.18611	0.0908439	17	0.022711
4.5	1.1433	1.21435	1.16073	1.15569	1.14292	1.12168	1.177	1.23614	1.22737	1.10361	1.32983	1.51681	1.11982	1.13503	1.16862	1.194	1.18368		1.19592	0.0990807	17	0.0247702		1.14196	1.22152	1.15867	1.15107	1.15582	1.11884	1.18186	1.22206	1.23458	1.11732	1.33194	1.50907	1.11765	1.13207	1.16719	1.21031	1.15876		1.19592	0.0975492	17	0.0243873
4.66667	1.1495	1.22685	1.16617	1.16295	1.13873	1.11629	1.2073	1.21446	1.25165	1.11373	1.3452	1.54377	1.11995	1.1552	1.1964	1.23466	1.15474		1.20574	0.105268	17	0.026317
4.83333	1.16165	1.23338	1.2063	1.16057	1.18993	1.13304	1.18037	1.22816	1.24343	1.07774	1.3297	1.47266	1.12762	1.14225	1.15243	1.25463	1.19707		1.20535	0.0905833	17	0.0226458
5	1.18261	1.23826	1.19826	1.16491	1.19159	1.14721	1.21001	1.21486	1.24091	1.07848	1.35721	1.5327	1.12878	1.14275	1.19744	1.23906	1.16412		1.21348	0.10189	17	0.0254725
5.16667	1.1638	1.2434	1.19777	1.15909	1.11146	1.12676	1.22063	1.23469	1.2668	1.12012	1.33465	1.52	1.13712	1.17207	1.23301	1.20544	1.17506		1.21305	0.0983165	17	0.0245791
5.33333	1.17132	1.25644	1.19277	1.16714	1.22823	1.15575	1.22045	1.2427	1.25031	1.14047	1.36194	1.56509	1.12506	1.18227	1.19694	1.21904	1.19454		1.22767	0.102786	17	0.0256965
5.5	1.14219	1.24802	1.1575	1.18219	1.21737	1.13165	1.2143	1.24894	1.26699	1.13985	1.3674	1.57711	1.15713	1.17457	1.24698	1.21433	1.22259		1.22995	0.107193	17	0.0267983
5.66667	1.16304	1.23124	1.18728	1.18884	1.2364	1.15138	1.25401	1.23759	1.29125	1.16886	1.32133	1.54547	1.14624	1.18137	1.18172	1.22833	1.15701		1.22773	0.0959058	17	0.0239764
5.83333	1.18221	1.26193	1.247	1.20354	1.23775	1.14163	1.24111	1.22671	1.26512	1.142	1.35647	1.6499	1.15146	1.19324	1.26304	1.24454	1.20499		1.2478	0.116631	17	0.0291578
6	1.18815	1.26079	1.20503	1.17324	1.19098	1.10788	1.21383	1.19117	1.24566	1.11312	1.2933	1.50501	1.16534	1.1882	1.24712	1.22893	1.20907		1.21922	0.0876712	17	0.0219178
6.16667	1.16257	1.22311	1.19127	1.14002	1.19741	1.10438	1.16416	1.11217	1.16938	1.05976	1.20756	1.34216	1.10594	1.13999	1.18899	1.23201	1.1591		1.17059	0.0638303	17	0.0159576
6.33333	1.12147	1.15644	1.10216	1.13066	1.1489	1.10609	1.13393	1.07038	1.13114	1.00568	1.09264	1.2317	1.0857	1.10426	1.10536	1.10692	1.12328		1.1151	0.0456055	17	0.0114014
6.5	1.12486	1.14378	1.08807	1.11397	1.07094	1.09215	1.13389	1.06407	1.10506	0.999647	1.06583	1.17964	1.07076	1.0844	1.10549	1.09307	1.05837		1.09376	0.0403677	17	0.0100919
6.66667	1.09716	1.09701	1.06464	1.11478	1.15558	1.08565	1.09615	1.01599	1.07545	0.964096	1.04959	1.07567	1.08363	1.06766	1.13157	1.03236	1.07399		1.07535	0.0442245	17	0.0110561
6.83333	1.10721	1.07971	1.04516	1.1246	1.1287	1.09489	1.08303	1.03032	1.0732	0.972854	1.02507	1.02253	1.06193	1.07043	1.09147	1.09102	1.12096		1.07195	0.0419128	17	0.0104782
7	1.10039	1.08027	1.08398	1.10426	1.09168	1.11469	1.06	1.00075	1.06376	0.970436	1.01158	0.931096	1.0777	1.06361	1.01119	1.0218	1.06998		1.05042	0.051104	17	0.012776
7.16667	1.13106	1.04481	1.03313	1.11381	1.12223	1.10422	1.09903	1.00724	1.04111	0.921464	0.990726	0.968189	1.0588	1.0611	1.05597	1.06194	1.04951		1.05084	0.0561901	17	0.0140475
7.33333	1.11678	1.07225	1.04645	1.13028	1.12003	1.0974	1.06741	1.00158	1.00673	0.958968	0.94457	0.913962	1.06086	1.0744	1.05464	1.01194	1.10647		1.04616	0.0642812	17	0.0160703
7.5	1.1461	1.05935	1.00547	1.1104	1.0736	1.09868	1.06261	0.990252	1.06249	0.981239	0.967635	0.961199	1.07513	1.06334	1.05728	1.02342	1.05919		1.04691	0.0516318	17	0.012908		1.13271	1.07092	1.03382	1.12339	1.1003	1.09192	1.0756	0.998257	1.04419	0.974556	0.973222	0.95813	1.06933	1.0664	1.06959	1.01147	1.09397		1.05222	0.0530141	17	0.0132535
7.66667	1.13525	1.08116	1.04954	1.1295	1.10727	1.07967	1.09678	1.00294	1.06334	0.983462	1.00746	0.99923	1.07201	1.06146	1.09685	0.999044	1.11625		1.0636	0.0492228	17	0.0123057
7.83333	1.13729	1.0827	1.05476	1.11366	1.08085	1.11556	1.14401	1.0266	1.06544	0.955505	1.01811	0.996886	1.06277	1.07346	1.08226	0.998093	1.10015		1.06518	0.0521116	17	0.0130279
8	1.14812	1.08898	1.04983	1.12967	1.08326	1.1052	1.10361	1.01487	1.05977	0.94598	0.996781	0.938667	1.0677	1.03971	1.03486	1.00136	1.05793		1.05096	0.058609	17	0.0146522
8.16667	1.1555	1.08989	1.04018	1.13123	1.10719	1.1091	1.10292	1.03102	1.06375	0.940771	0.962596	0.952927	1.05633	1.04256	1.06798	0.97989	1.04635		1.05178	0.0631551	17	0.0157888
8.33333	1.14149	1.07359	1.01002	1.11486	1.06079	1.09833	1.13648	1.03709	1.08555	0.963624	1.00781	1.01659	1.0667	1.04806	1.04361	1.04639	1.14202		1.06429	0.0511012	17	0.0127753
8.5	1.16286	1.07862	1.02433	1.12419	1.176	1.12461	1.09804	1.0118	1.08994	0.976187	1.04313	1.0303	1.07434	1.04676	1.03208	0.98132	1.11006		1.06968	0.0586685	17	0.0146671
8.66667	1.13036	1.0713	1.01521	1.10505	1.1315	1.11392	1.0933	1.02442	1.08597	0.969704	0.993792	0.95354	1.05391	1.04495	1.03026	1.00557	1.04363		1.05096	0.054224	17	0.013556
8.83333	1.16538	1.09683	1.03023	1.10294	1.08184	1.09573	1.089	1.01938	1.09761	0.953382	1.02012	0.978241	1.06006	1.03767	1.04648	1.03512	1.10129		1.05949	0.0521379	17	0.0130345
9	1.15676	1.05424	1.01986	1.17157	1.21012	1.17449	1.11658	1.04466	1.19198	1.00638	1.07912	1.05334	1.05453	1.06208	1.07565	1.00129	1.10078		1.09255	0.066432	17	0.016608
9.16667	1.2142	1.18211	1.16276	1.2138	1.26416	1.20295	1.20953	1.13281	1.22653	1.0309	1.21145	1.28805	1.14152	1.15592	1.16054	1.05871	1.18502		1.17888	0.0649694	17	0.0162424
9.33333	1.21253	1.22981	1.20103	1.21094	1.19976	1.19142	1.21731	1.17371	1.26655	1.044	1.21826	1.2861	1.16835	1.16211	1.17831	1.10802	1.2089		1.19277	0.0555098	17	0.0138775
9.5	1.22941	1.21568	1.18943	1.22239	1.22597	1.21053	1.25311	1.16992	1.25153	1.03416	1.21396	1.36273	1.16166	1.17545	1.22944	1.17059	1.22372		1.20822	0.0643662	17	0.0160915
9.66667	1.22327	1.24712	1.181	1.22064	1.26147	1.18575	1.27596	1.18736	1.25689	1.09558	1.27221	1.39452	1.16624	1.16897	1.22375	1.1329	1.19171		1.21678	0.0675929	17	0.0168982
9.83333	1.24611	1.26501	1.19039	1.21933	1.33238	1.18138	1.32294	1.18717	1.28412	1.0669	1.25449	1.36954	1.17762	1.18104	1.22052	1.14753	1.28832		1.23146	0.0756161	17	0.018904
10	1.23036	1.27255	1.17303	1.24121	1.26431	1.24659	1.32668	1.21003	1.30468	1.0803	1.28984	1.45939	1.16227	1.18496	1.27362	1.21402	1.28745		1.24831	0.0817551	17	0.0204388
10.1667	1.26244	1.28388	1.24157	1.25113	1.2976	1.21238	1.31263	1.20511	1.30592	1.09653	1.27107	1.45758	1.16986	1.19317	1.22436	1.17549	1.27633		1.24924	0.0781632	17	0.0195408
10.3333	1.25725	1.29487	1.24952	1.24967	1.31904	1.20416	1.33735	1.22561	1.29759	1.12738	1.24631	1.40001	1.17404	1.18662	1.24815	1.19878	1.27587		1.25248	0.0661222	17	0.0165305
10.5	1.25366	1.31945	1.24503	1.25218	1.32223	1.21009	1.35417	1.2127	1.28345	1.07616	1.29234	1.43947	1.17398	1.20409	1.24689	1.16231	1.27044		1.25404	0.0824152	17	0.0206038		1.26386	1.3159	1.24633	1.25496	1.33398	1.20923	1.33879	1.22167	1.2873	1.11191	1.28079	1.45116	1.17345	1.1938	1.24428	1.18133	1.27161		1.25767	0.0778954	17	0.0194738
10.6667	1.28067	1.33338	1.24443	1.26302	1.36068	1.21343	1.32486	1.2267	1.28087	1.13219	1.30372	1.51401	1.17234	1.1907	1.23781	1.18291	1.26852		1.26648	0.0884476	17	0.0221119
10.8333	1.28365	1.33465	1.28982	1.26787	1.38207	1.2571	1.35333	1.2471	1.31413	1.08897	1.30872	1.48111	1.17683	1.19816	1.25393	1.17701	1.28282		1.27631	0.0894351	17	0.0223588
11	1.29948	1.33013	1.27464	1.27183	1.30425	1.22087	1.39653	1.23076	1.31198	1.06193	1.31557	1.52523	1.19522	1.20411	1.24771	1.15731	1.3279		1.27503	0.101234	17	0.0253085
11.1667	1.31245	1.34871	1.27369	1.26904	1.38668	1.22158	1.34016	1.22363	1.28525	1.088	1.32349	1.50291	1.19614	1.20114	1.27863	1.18243	1.30921		1.27901	0.0934097	17	0.0233524
11.3333	1.28	1.35804	1.21746	1.26373	1.36551	1.24383	1.37593	1.24957	1.32604	1.11	1.32242	1.57969	1.20639	1.22322	1.29073	1.17708	1.26382		1.2855	0.103304	17	0.0258259
11.5	1.2864	1.37776	1.23598	1.28804	1.35534	1.23835	1.38373	1.25537	1.29114	1.09358	1.3261	1.53946	1.21587	1.21612	1.28762	1.16918	1.3185		1.28697	0.0987064	17	0.0246766
11.6667	1.29076	1.35475	1.27893	1.29778	1.30812	1.26232	1.37982	1.24395	1.32319	1.09627	1.34405	1.57616	1.20726	1.21116	1.26733	1.16767	1.355		1.29203	0.103621	17	0.0259052
11.8333	1.3016	1.38958	1.28345	1.28676	1.36395	1.2483	1.37295	1.26862	1.31174	1.1224	1.38243	1.61602	1.21237	1.23518	1.27871	1.18521	1.32559		1.30499	0.107712	17	0.026928
12	1.31255	1.36775	1.27306	1.263	1.34999	1.22855	1.38268	1.25719	1.30851	1.13132	1.3312	1.54585	1.19341	1.23476	1.24059	1.18605	1.33421		1.29063	0.0951528	17	0.0237882
12.1667	1.3424	1.38054	1.28563	1.22494	1.26696	1.19297	1.27718	1.17525	1.24042	1.05047	1.23688	1.44102	1.16665	1.17389	1.21354	1.11921	1.33471		1.24251	0.0972446	17	0.0243112
12.3333	1.29883	1.3498	1.27007	1.20226	1.25654	1.18862	1.25425	1.13352	1.1933	0.986805	1.18747	1.31257	1.12786	1.10616	1.12959	1.04293	1.22543		1.19212	0.0966199	17	0.024155
12.5	1.29952	1.31263	1.24739	1.19421	1.19826	1.18622	1.26814	1.12531	1.16638	0.988175	1.16128	1.21655	1.10808	1.10371	1.12383	1.06966	1.28011		1.17938	0.087592	17	0.021898
12.6667	1.24622	1.23597	1.17938	1.22001	1.20215	1.2187	1.22903	1.09981	1.14593	0.957025	1.12557	1.22182	1.11906	1.10752	1.11498	1.01818	1.25296		1.15849	0.0838037	17	0.0209509
12.8333	1.22443	1.17975	1.16018	1.19636	1.20104	1.1932	1.20167	1.10229	1.13124	0.943218	1.10262	1.11408	1.10766	1.08928	1.09289	1.04508	1.18302		1.13341	0.0711086	17	0.0177772
13	1.23727	1.191	1.17623	1.20757	1.24566	1.20635	1.2164	1.0743	1.12101	0.969639	1.09169	1.15836	1.11627	1.09235	1.08906	0.988627	1.15232		1.1373	0.0806556	17	0.0201639
13.1667	1.245	1.17791	1.09544	1.21303	1.28408	1.2104	1.2001	1.07698	1.08751	0.917078	1.0769	1.04546	1.12002	1.09834	1.057	1.00554	1.17603		1.12275	0.0941388	17	0.0235347
13.3333	1.25464	1.14858	1.12477	1.20824	1.24671	1.22825	1.22671	1.0836	1.07235	0.928106	1.03081	1.02066	1.10536	1.09406	1.12361	0.998051	1.21124		1.12387	0.0961765	17	0.0240441
13.5	1.2448	1.15165	1.11367	1.2083	1.222	1.21085	1.22202	1.07822	1.13391	0.963203	1.11961	1.15639	1.10141	1.08245	1.0723	1.02147	1.1973		1.13527	0.0778941	17	0.0194735		1.25135	1.14321	1.10898	1.20113	1.22834	1.20587	1.22359	1.08192	1.10468	0.944672	1.08503	1.10001	1.10359	1.08729	1.08723	1.00158	1.20445		1.12723	0.0833154	17	0.0208288
13.6667	1.25462	1.12939	1.08851	1.18685	1.21631	1.17851	1.22205	1.08395	1.10778	0.942707	1.10468	1.12299	1.104	1.08537	1.06578	0.985227	1.20481		1.12256	0.0827458	17	0.0206865
13.8333	1.27234	1.13477	1.10007	1.21206	1.21912	1.22159	1.23736	1.09224	1.11207	0.936911	1.10632	1.13403	1.10151	1.08892	1.05633	1.00208	1.15167		1.1282	0.0866323	17	0.0216581
14	1.23167	1.14529	1.0544	1.19462	1.2135	1.22767	1.22655	1.09681	1.12241	0.966497	1.1149	1.0652	1.11832	1.1007	1.06337	0.950825	1.17123		1.12141	0.0853662	17	0.0213416
14.1667	1.24886	1.14503	1.12567	1.20692	1.24692	1.21375	1.17475	1.07014	1.11227	0.923325	1.08527	1.06833	1.1078	1.09794	1.05501	0.99649	1.17864		1.12101	0.0870891	17	0.0217723
14.3333	1.27874	1.14174	1.14459	1.20784	1.28357	1.21818	1.20939	1.06325	1.12376	0.931906	1.08298	1.05231	1.10758	1.10483	1.04772	1.02884	1.14406		1.12772	0.0923401	17	0.023085
14.5	1.27178	1.13316	1.15389	1.22289	1.25337	1.179	1.22115	1.07787	1.10013	0.924273	1.07115	1.01674	1.12222	1.08799	1.08763	0.973112	1.156		1.12073	0.0951687	17	0.0237922
14.6667	1.25568	1.14999	1.07562	1.19076	1.18086	1.20431	1.23146	1.09892	1.12082	0.934314	1.15914	1.17838	1.11586	1.09052	1.04741	0.945207	1.14863		1.12517	0.0889025	17	0.0222256
14.8333	1.26669	1.12291	1.08475	1.20512	1.19973	1.22645	1.24932	1.08215	1.14979	0.953281	1.1099	1.1396	1.10795	1.07112	1.05784	0.93845	1.14474		1.12411	0.0917579	17	0.0229395
15	1.2746	1.14167	1.10596	1.19674	1.22031	1.20795	1.25972	1.0838	1.14009	0.971774	1.10329	1.10502	1.11046	1.08447	1.05404	0.950558	1.14467		1.12677	0.0888145	17	0.0222036
TRPM4 (F11)
Time (min)	Cell 4-1	Cell 4-2	Cell 5-1	Cell 5-2	Cell 14-1	Cell 14-2	Cell 14-3	Cell 15-1	Cell 15-2	Cell 15-3	Mean	SD	number	SEM		Cell 4-1	Cell 4-2	Cell 5-1	Cell 5-2	Cell 14-1	Cell 14-2	Cell 14-3	Cell 15-1	Cell 15-2	Cell 15-3	Mean	SD	number	SEM		T.Test (750 (1) vs 650)	T.Test (650 vs 750(2))
0	0.990355	0.966443	0.937379	0.963233	0.99604	1.01541	0.937157	0.978839	0.969623	1.02022	0.97747	0.0286706	10	0.00955687																	0.000105052	0.00167431
0.166667	1.01998	0.984258	0.959482	0.98013	0.978632	0.982044	0.933858	0.977832	0.974626	1.02449	0.981533	0.0261664	10	0.00872212
0.333333	0.992258	0.991667	0.962224	0.991319	0.999837	0.976898	0.934758	1.00755	1.00093	1.0037	0.986114	0.0225225	10	0.00750752
0.5	0.989213	0.983879	0.983123	0.983605	0.967501	0.97262	0.929055	0.998723	0.982809	1.01071	0.980124	0.0216799	10	0.00722662
0.666667	1.00114	0.989053	0.98892	0.996327	0.98243	0.961076	0.945318	1.00775	1.0017	0.988691	0.98624	0.0193474	10	0.00644914
0.833333	1.00199	0.994089	1.0114	0.990799	0.980613	0.982374	0.963738	1.00372	0.996885	1.02082	0.994643	0.0164148	10	0.00547159
1	0.983252	0.979619	0.992324	0.99975	0.980281	0.97037	0.988177	1.00738	1.0002	0.986864	0.988822	0.0112494	10	0.0037498
1.16667	0.990293	1.00088	1.00028	1.01272	0.993954	0.975542	0.991889	0.995264	0.999882	0.982441	0.994314	0.0103544	10	0.00345147
1.33333	1.00541	1.00287	1.01335	1.01216	0.985983	0.987821	0.994917	1.00864	0.993778	0.991831	0.999676	0.0100735	10	0.00335784
1.5	1.00159	1.00459	1.01134	1.00897	0.999204	1.00764	1.00005	0.98998	1.01724	0.999775	1.00404	0.00764694	10	0.00254898		0.998201	1.00481	1.01458	1.00997	0.992211	0.997479	0.992611	0.998641	1.00879	0.99156	1.00088	0.00818012	10	0.00272671
1.66667	0.987603	1.00696	1.01904	1.00877	0.991447	0.996976	0.982865	0.997304	1.01534	0.983075	0.998938	0.0130607	10	0.00435356
1.83333	0.989693	0.999721	1.00796	0.997106	1.0075	1.01022	1.0236	0.98664	1.0032	1.0068	1.00324	0.0106742	10	0.00355806
2	1.00413	1.01279	1.00742	1.0023	0.992508	1.02349	1.04237	1.00739	1.00768	1.01165	1.01117	0.01352	10	0.00450667
2.16667	0.990069	0.997941	1.00886	1.00118	0.999523	1.00324	1.03025	1.01008	1.00604	1.01064	1.00578	0.0106744	10	0.00355814
2.33333	0.991355	1.01061	1.01609	1.01019	1.00955	1.00963	1.05344	0.992565	1.00781	0.975131	1.00764	0.0203887	10	0.00679624
2.5	1.00357	0.996977	1.01133	1.00668	1.03616	1.0236	1.05311	0.993325	1.02183	0.978669	1.01253	0.021826	10	0.00727535
2.66667	0.996444	1.0103	1.02363	1.01339	1.03525	1.02183	1.05552	1.00096	0.995665	0.988056	1.0141	0.0206317	10	0.00687722
2.83333	0.988074	1.00583	1.02684	1.01116	1.03481	1.02874	1.05535	1.00444	0.997998	0.991393	1.01446	0.0214175	10	0.00713915
3	1.07748	1.09375	1.03016	1.01968	1.05104	1.01713	1.05431	1.02408	1.03295	1.05577	1.04564	0.0255768	10	0.00852559
3.16667	1.37505	1.29983	1.22753	1.12669	1.20128	1.36447	1.21901	1.16082	1.36596	1.42762	1.27683	0.103291	10	0.0344302
3.33333	1.38731	1.30119	1.22343	1.12258	1.22535	1.44376	1.23489	1.18818	1.41008	1.50861	1.30454	0.126217	10	0.0420725
3.5	1.41727	1.30355	1.23889	1.12055	1.25011	1.489	1.2718	1.22979	1.44048	1.5435	1.33049	0.134728	10	0.0449093
3.66667	1.41113	1.30766	1.23632	1.1224	1.25953	1.52845	1.26945	1.23118	1.44711	1.60999	1.34232	0.151777	10	0.0505923
3.83333	1.4309	1.30719	1.22309	1.12996	1.29328	1.61396	1.28328	1.23669	1.46658	1.63301	1.36179	0.16845	10	0.05615
4	1.43344	1.30999	1.22481	1.1252	1.30496	1.59125	1.29528	1.26123	1.46455	1.65507	1.36658	0.166439	10	0.0554795
4.16667	1.46234	1.3112	1.23609	1.13656	1.30641	1.61336	1.29244	1.25493	1.48641	1.66199	1.37617	0.171711	10	0.0572371
4.33333	1.44419	1.31745	1.2259	1.11478	1.31909	1.65828	1.31579	1.26725	1.47772	1.69378	1.38342	0.184991	10	0.0616638
4.5	1.43718	1.29849	1.23047	1.12699	1.34135	1.66845	1.31498	1.28199	1.48885	1.68842	1.38772	0.182937	10	0.060979		1.44646	1.30892	1.23239	1.12524	1.33111	1.66219	1.31453	1.28319	1.48488	1.69412	1.3883	0.182825	10	0.0609416
4.66667	1.458	1.31081	1.2408	1.13395	1.33289	1.65985	1.31282	1.30032	1.48806	1.70016	1.39377	0.180884	10	0.0602946
4.83333	1.46683	1.30607	1.2364	1.13369	1.36842	1.68541	1.33902	1.32499	1.48942	1.71962	1.40699	0.186321	10	0.0621071
5	1.4651	1.31434	1.24571	1.1326	1.36066	1.71174	1.35677	1.28285	1.47781	1.70461	1.40522	0.188496	10	0.0628319
5.16667	1.48071	1.32753	1.23447	1.13119	1.35863	1.71874	1.3557	1.30831	1.48083	1.69926	1.40954	0.188645	10	0.0628816
5.33333	1.46925	1.32577	1.23599	1.12533	1.39056	1.72075	1.35683	1.31574	1.48188	1.71369	1.41358	0.190859	10	0.0636196
5.5	1.47379	1.30054	1.2338	1.12902	1.39329	1.72732	1.39621	1.31505	1.48228	1.73113	1.41824	0.195475	10	0.0651582
5.66667	1.46553	1.31308	1.23489	1.1374	1.42262	1.76384	1.40109	1.3042	1.47498	1.71284	1.42305	0.196728	10	0.0655761
5.83333	1.47263	1.31104	1.23829	1.1317	1.39043	1.75703	1.39	1.29935	1.48305	1.72381	1.41973	0.199157	10	0.0663858
6	1.45604	1.31594	1.22763	1.13941	1.4074	1.78408	1.42487	1.32055	1.46867	1.71554	1.42601	0.199956	10	0.0666521
6.16667	1.17294	1.10648	1.11762	1.04477	1.28457	1.44523	1.28577	1.19546	1.16646	1.39226	1.22116	0.128513	10	0.0428378
6.33333	1.10494	1.05793	1.09439	1.04793	1.23198	1.32772	1.29239	1.19523	1.09431	1.30822	1.1755	0.108666	10	0.0362219
6.5	1.10497	1.0537	1.10418	1.04983	1.20778	1.27071	1.29337	1.20136	1.06629	1.21584	1.1568	0.0915403	10	0.0305134
6.66667	1.09628	1.07899	1.09778	1.05613	1.19916	1.25054	1.26036	1.21948	1.0512	1.16948	1.14794	0.0810329	10	0.027011
6.83333	1.09036	1.07206	1.10466	1.05997	1.21427	1.25348	1.26986	1.18947	1.05715	1.16012	1.14714	0.0811018	10	0.0270339
7	1.07	1.07319	1.13139	1.07434	1.20248	1.25461	1.25746	1.20325	1.05984	1.10564	1.14322	0.0789431	10	0.0263144
7.16667	1.05085	1.0741	1.10125	1.05447	1.20473	1.24068	1.27176	1.16927	1.05261	1.12232	1.1342	0.0825059	10	0.027502
7.33333	1.04303	1.07516	1.10859	1.06039	1.20543	1.24964	1.26533	1.14325	1.06612	1.14148	1.13584	0.0804429	10	0.0268143
7.5	1.0786	1.0729	1.11821	1.05037	1.19011	1.23331	1.25246	1.15422	1.07244	1.08606	1.13087	0.072639	10	0.024213		1.05849	1.0766	1.11066	1.04914	1.19986	1.24219	1.26511	1.14446	1.06522	1.10837	1.13201	0.0784803	10	0.0261601
7.66667	1.05383	1.08174	1.10519	1.03665	1.20405	1.24361	1.27754	1.13592	1.05711	1.09758	1.12932	0.0843365	10	0.0281122
7.83333	1.07424	1.07777	1.1069	1.05016	1.2004	1.2394	1.2854	1.13063	1.07264	1.1003	1.13378	0.0801723	10	0.0267241
8	1.07718	1.08006	1.10226	1.04966	1.20257	1.25601	1.29195	1.10887	1.06208	1.08273	1.13134	0.0863822	10	0.0287941
8.16667	1.06144	1.08297	1.11552	1.04291	1.22047	1.24457	1.30727	1.12127	1.06567	1.11941	1.13815	0.088885	10	0.0296283
8.33333	1.04815	1.07157	1.11507	1.04564	1.23117	1.23584	1.29891	1.11966	1.06515	1.1274	1.13586	0.0890676	10	0.0296892
8.5	1.06008	1.07897	1.12092	1.04108	1.19847	1.24058	1.30605	1.12258	1.071	1.10373	1.13435	0.086557	10	0.0288523
8.66667	1.05848	1.07713	1.12353	1.05081	1.21627	1.2234	1.27931	1.08103	1.06207	1.11726	1.12893	0.0815449	10	0.0271816
8.83333	1.04113	1.07527	1.10772	1.05015	1.22534	1.22696	1.28369	1.07378	1.07953	1.11982	1.12834	0.0854148	10	0.0284716
9	1.05238	1.0751	1.1115	1.04588	1.20869	1.22315	1.27468	1.07187	1.06914	1.1268	1.12592	0.0810935	10	0.0270312
9.16667	1.43327	1.37117	1.29501	1.15482	1.40787	1.62632	1.45905	1.277	1.42523	1.53277	1.39825	0.133835	10	0.0446117
9.33333	1.46524	1.32963	1.29023	1.13161	1.45385	1.68519	1.49732	1.24288	1.45638	1.60245	1.41548	0.167813	10	0.0559377
9.5	1.4435	1.33592	1.29284	1.14353	1.44932	1.7004	1.51531	1.21129	1.48038	1.6805	1.4253	0.18366	10	0.0612201
9.66667	1.4646	1.3395	1.29448	1.13962	1.48183	1.76659	1.55063	1.22325	1.48684	1.71086	1.44582	0.201373	10	0.0671244
9.83333	1.47508	1.34254	1.31218	1.15673	1.50601	1.78669	1.5509	1.21643	1.51032	1.70923	1.45661	0.202433	10	0.0674777
10	1.4847	1.36941	1.31886	1.1597	1.50001	1.7889	1.56205	1.19686	1.50012	1.74136	1.4622	0.20792	10	0.0693065
10.1667	1.47451	1.35968	1.30406	1.15188	1.51066	1.81747	1.56995	1.19109	1.51471	1.74721	1.46412	0.218478	10	0.0728262
10.3333	1.48196	1.35888	1.31083	1.16341	1.50613	1.82306	1.57471	1.2099	1.53063	1.77538	1.47349	0.219395	10	0.0731317
10.5	1.47635	1.35766	1.31352	1.1553	1.53714	1.83735	1.57608	1.22801	1.51824	1.74701	1.47467	0.217126	10	0.0723753		1.48076	1.36107	1.31348	1.15633	1.52319	1.83835	1.57149	1.21926	1.52124	1.76328	1.47485	0.219838	10	0.0732794
10.6667	1.48396	1.36666	1.3161	1.15028	1.52631	1.85465	1.56369	1.21987	1.51484	1.76746	1.47638	0.223442	10	0.0744805
10.8333	1.49674	1.36278	1.31768	1.15424	1.53908	1.85484	1.57671	1.21621	1.52785	1.77872	1.48249	0.226295	10	0.0754315
11	1.48331	1.36586	1.31768	1.15199	1.55196	1.88019	1.59019	1.20401	1.52066	1.78665	1.48525	0.234765	10	0.078255
11.1667	1.47132	1.37279	1.3138	1.14773	1.55218	1.88113	1.60437	1.22221	1.53014	1.78489	1.48806	0.233918	10	0.0779725
11.3333	1.49582	1.36348	1.32088	1.15756	1.558	1.88387	1.59691	1.2131	1.5254	1.81739	1.49324	0.238363	10	0.0794543
11.5	1.51219	1.3804	1.31811	1.14939	1.56216	1.92094	1.63045	1.21039	1.55038	1.81698	1.50514	0.248364	10	0.0827878
11.6667	1.49052	1.36215	1.32292	1.1624	1.56156	1.95057	1.64955	1.2069	1.51943	1.80865	1.50346	0.252767	10	0.0842558
11.8333	1.5026	1.37838	1.32557	1.16198	1.57341	1.94138	1.6485	1.1892	1.5151	1.84791	1.5084	0.257962	10	0.0859873
12	1.49623	1.36606	1.31853	1.1641	1.58803	1.90541	1.65116	1.18652	1.52841	1.82219	1.50266	0.249774	10	0.0832579
12.1667	1.22517	1.15961	1.22742	1.08665	1.57165	1.92824	1.65401	1.05489	1.22966	1.55646	1.36938	0.289168	10	0.0963895
12.3333	1.14551	1.13609	1.19586	1.0857	1.56496	1.96395	1.66255	1.0536	1.16276	1.44359	1.34146	0.304222	10	0.101407
12.5	1.14564	1.1342	1.20242	1.09391	1.45856	1.59787	1.55026	1.07223	1.12867	1.35555	1.27393	0.199258	10	0.0664192
12.6667	1.13133	1.13074	1.20765	1.10114	1.40364	1.51993	1.54012	1.04214	1.10722	1.34321	1.25271	0.18412	10	0.0613734
12.8333	1.13345	1.13518	1.20516	1.09913	1.35715	1.45198	1.54236	1.05403	1.11598	1.31852	1.24129	0.166531	10	0.0555104
13	1.12239	1.13321	1.20403	1.1092	1.3837	1.43734	1.54288	1.0331	1.11701	1.29958	1.23824	0.168793	10	0.0562645
13.1667	1.14345	1.14279	1.19921	1.08605	1.35709	1.43748	1.52596	1.03123	1.1137	1.2958	1.23328	0.163577	10	0.0545255
13.3333	1.12924	1.13416	1.20892	1.09796	1.34686	1.4057	1.52189	1.02221	1.11658	1.25641	1.22399	0.157523	10	0.0525076
13.5	1.11785	1.1194	1.20578	1.10337	1.34733	1.4398	1.49858	1.00455	1.11475	1.27578	1.22272	0.162284	10	0.0540947		1.12148	1.12698	1.2075	1.09988	1.3466	1.42039	1.51604	1.01176	1.1242	1.26814	1.2243	0.160361	10	0.0534536
13.6667	1.11736	1.12737	1.2078	1.09832	1.3456	1.41567	1.52766	1.00853	1.14128	1.27223	1.22618	0.16195	10	0.0539832
13.8333	1.11665	1.12654	1.20233	1.09079	1.36705	1.39824	1.53391	1.01545	1.15621	1.27004	1.22772	0.161992	10	0.0539975
14	1.11077	1.13746	1.20985	1.09159	1.32906	1.39952	1.48441	0.999124	1.13211	1.26459	1.21585	0.151913	10	0.0506376
14.1667	1.09873	1.12869	1.20531	1.09351	1.33064	1.37239	1.48944	0.982751	1.14052	1.25922	1.21012	0.15293	10	0.0509766
14.3333	1.10436	1.13264	1.21032	1.09771	1.32328	1.39325	1.47571	0.991779	1.13501	1.24414	1.21082	0.149507	10	0.0498357
14.5	1.09973	1.12964	1.21239	1.09748	1.3264	1.37964	1.48282	1.00321	1.12771	1.25897	1.2118	0.149049	10	0.049683
14.6667	1.09486	1.13137	1.20338	1.09395	1.35101	1.40465	1.48994	0.984665	1.13975	1.25914	1.21527	0.158793	10	0.0529311
14.8333	1.09617	1.14422	1.2123	1.08404	1.33565	1.41473	1.48871	0.981401	1.15082	1.25582	1.21639	0.158461	10	0.0528203
15	1.0999	1.13993	1.20508	1.08963	1.34275	1.40384	1.50802	0.962673	1.13259	1.27603	1.21604	0.165568	10	0.0551893
