# Supplementary material for: Genetic code expansion, click chemistry, and light-activated PI3K reveal details of membrane protein trafficking downstream of receptor tyrosine kinases
Source: eLife. 2024 Aug 20;12:RP91012. doi: 10.7554/eLife.91012 (PMC11335347; doi:10.7554/eLife.91012)
Supplement: Figure 2—source data 1. [file elife-91012-fig2-data1.xlsx]

## Sheet: Akt-PH
	02-16-16slp2_V1-YFP					02-16-16slp3_V1-YFP	02-16-16slp4_V1-YFP				03-30-16slp3			04-05-16slp2	04-13-16slp1						04-13-16slp2								04-13-16slp3											04-19-16slp1									04-19-16slp2
	norm to avg 8-10min
min	c1	c3	c4	c5	c6	c4	c4	c5	c6	c7	cell1	cell2	cell3	cell2	cell 1	cell 3	cell 4	cell 8	cell 9	cell 14	cell 1	cell 2	cell 4	cell 5	cell 6	cell 7	cell 8	cell 9	cell 1	cell 3	cell 6	cell 8	cell 9	cell 10	cell 12	cell 13	cell 15	cell 17	cell 18	cell 1	cell 2_area1	cell 2_area2	cell 3	cell 4	cell 5	cell 6	cell 8	cell 9	cell 1
0	0.635351	0.878184	0.641801	0.525848	0.745638	0.376858	0.724232	0.83412	0.873136	0.6307	1.08218	0.849556	0.795098	1.08718	0.808427	0.866105	0.872877	1.17517	0.821416	0.944658	0.895107	0.901089	0.939035	0.958784	0.853461	0.921131	0.935065	0.972097	0.75526	0.737154	1.02963	0.752225	0.972609	0.465168	1.02863	0.941564	0.168908	0.618315	0.649367	0.813292	0.814796	0.792179	0.703154	0.861413	0.764353	0.831709	0.994186	1.04893	-0.169714
0.166667	0.632396	0.872648	0.673108	0.53722	0.74667	0.316043	0.713943	0.83977	0.881099	0.65385	1.13614	0.840841	0.790142	1.18079	0.781721	0.945726	0.868479	1.17049	0.84578	0.889599	0.923122	0.927146	0.951009	0.989533	0.879129	0.936897	0.944888	0.986196	0.79807	0.766265	1.08838	0.816735	1.01004	0.459518	1.06459	1.00993	0.238209	0.666072	0.695046	0.752879	0.827761	0.802353	0.796596	0.881551	0.810651	0.83679	0.96308	1.00934	-0.0838031
0.333333	0.632363	0.894168	0.669826	0.558055	0.739582	0.359868	0.717844	0.839662	0.881697	0.59935	1.14938	0.869341	0.79908	1.18632	0.79369	0.940442	0.878734	1.19219	0.845923	0.881646	0.932631	0.935307	0.955597	0.992173	0.892596	0.937455	0.955186	0.998146	0.812841	0.765854	1.08879	0.826925	1.0276	0.456905	1.07728	1.02554	0.238577	0.666686	0.679119	0.763423	0.854374	0.821052	0.775809	0.914531	0.800671	0.855038	0.972189	1.01726	-0.0308317
0.5	0.642027	0.883784	0.688055	0.572553	0.747604	0.356517	0.723943	0.841436	0.885866	0.582622	1.14733	0.874631	0.801535	1.15818	0.798333	0.961652	0.886882	1.19778	0.843318	0.944672	0.938647	0.945349	0.965827	0.991735	0.904305	0.949043	0.9629	1.00429	0.821185	0.772343	1.07933	0.843028	1.02509	0.475645	1.06783	1.02309	0.270461	0.673565	0.719308	0.774207	0.855105	0.813843	0.809608	0.900729	0.845405	0.811056	0.967556	1.00962	0.0925672
0.666667	0.656548	0.876893	0.70449	0.580362	0.754979	0.45881	0.737828	0.836953	0.899509	0.574514	1.14337	0.907153	0.803334	1.12936	0.806436	0.95132	0.890517	1.17454	0.861165	0.875297	0.947289	0.94383	0.962204	0.995491	0.913634	0.952496	0.975673	1.0095	0.823243	0.777939	1.1002	0.860463	1.03316	0.477204	1.08554	1.03365	0.315302	0.696039	0.745679	0.770412	0.873702	0.840885	0.80517	0.930687	0.878174	0.842418	0.972924	1.0087	0.10953
0.833333	0.648983	0.901228	0.700807	0.605467	0.741308	0.487121	0.71889	0.82116	0.887376	0.604461	1.15054	0.920982	0.811024	1.16922	0.809855	0.955824	0.888955	1.18677	0.839406	0.906198	0.950864	0.950508	0.974593	1.00524	0.915911	0.960569	0.984013	1.01663	0.835499	0.786012	1.09066	0.861599	1.02886	0.482412	1.07724	1.04195	0.309962	0.693727	0.74553	0.782315	0.883703	0.855522	0.795548	0.921622	0.943731	0.877798	0.984537	1.0233	0.220647
1	0.632909	0.922976	0.715454	0.626501	0.734275	0.447846	0.725941	0.826869	0.881096	0.652737	1.14189	0.887708	0.780207	1.16007	0.81821	0.970275	0.892977	1.21981	0.847098	0.952953	0.972578	0.947468	0.962209	0.994732	0.922256	0.951694	0.97315	1.01669	0.833026	0.778944	1.08653	0.870253	1.0286	0.480648	1.09071	1.04774	0.318944	0.700746	0.758174	0.805762	0.875221	0.864577	0.834827	0.924164	0.957897	0.862523	0.979019	1.01239	0.182902
1.16667	0.655914	0.922412	0.706457	0.620701	0.744276	0.379527	0.744576	0.828516	0.884263	0.601355	1.15266	0.839974	0.779603	1.14205	0.821309	1.03272	0.894895	1.20992	0.847255	0.911722	0.973489	0.961849	0.964822	0.989182	0.926504	0.947712	0.985471	1.00604	0.839354	0.781154	1.08379	0.882509	1.03992	0.504227	1.0928	1.05642	0.346116	0.709056	0.785623	0.820943	0.886173	0.878303	0.849481	0.936989	0.967278	0.88991	0.980237	1.01916	0.154935
1.33333	0.663299	0.923979	0.703964	0.637317	0.736631	0.41958	0.743444	0.826923	0.87602	0.625146	1.14994	0.848853	0.78634	1.14152	0.822419	0.999157	0.886103	1.20109	0.849221	0.917683	0.964249	0.95816	0.95798	0.972743	0.934876	0.93576	0.983684	1.00014	0.838953	0.789656	1.09434	0.893498	1.03915	0.499982	1.09556	1.04626	0.376143	0.72816	0.79909	0.829884	0.878665	0.859924	0.867964	0.921062	0.971398	0.898439	0.977325	1.01389	0.172163
1.5	0.66114	0.929447	0.710725	0.655078	0.722146	0.475715	0.76402	0.840992	0.897206	0.597551	1.14914	0.841256	0.786658	1.1188	0.834023	1.07384	0.903074	1.20322	0.870484	0.931433	0.979828	0.979435	0.974701	0.991257	0.948	0.951913	0.99838	1.01699	0.839699	0.791613	1.08334	0.901314	1.04239	0.516601	1.0877	1.04489	0.399337	0.722858	0.804913	0.835581	0.888227	0.878949	0.882411	0.919232	0.964045	0.903599	0.969311	1.01525	0.104807
1.66667	0.664257	0.918057	0.699235	0.647272	0.728525	0.448943	0.777523	0.830948	0.915732	0.624356	1.14455	0.853373	0.797987	1.11735	0.840091	1.10729	0.90113	1.21131	0.880723	0.979758	0.967837	0.975301	0.969859	0.990919	0.940501	0.946438	0.989822	1.01497	0.856301	0.794057	1.06706	0.908516	1.05656	0.507206	1.08852	1.05092	0.39416	0.739575	0.808918	0.832441	0.884431	0.888723	0.879441	0.933435	0.959896	0.918681	0.974239	1.01229	0.153732
1.83333	0.6755	0.909526	0.694913	0.668307	0.788732	0.397305	0.787895	0.842979	0.926661	0.589345	1.13811	0.854697	0.794406	1.11576	0.86506	1.15399	0.909189	1.22754	0.916155	1.00224	0.97539	0.976147	0.972509	0.992821	0.931992	0.948881	0.993222	1.01534	0.858255	0.804631	1.06894	0.91979	1.0712	0.519206	1.08511	1.06444	0.444939	0.751802	0.817222	0.852707	0.884892	0.898691	0.882262	0.947898	0.946693	0.92235	0.976568	1.01095	0.171157
2	0.680953	0.910998	0.688846	0.704982	0.736105	0.317205	0.811477	0.862824	0.944631	0.600786	1.1395	0.862379	0.811644	1.09827	0.873657	1.18665	0.909642	1.22125	0.921274	0.984383	0.9772	0.971917	0.969193	0.983062	0.933951	0.947101	1.00343	1.01771	0.865673	0.805496	1.08946	0.921761	1.07863	0.497334	1.09448	1.06492	0.483865	0.766099	0.813301	0.850536	0.894462	0.916815	0.908216	0.951082	0.95525	0.94364	0.977942	1.01063	0.22912
2.16667	0.692175	0.915813	0.682418	0.723248	0.680259	0.44835	0.768758	0.841867	0.914746	0.598974	1.13467	0.859755	0.812667	1.08088	0.883997	1.21338	0.921526	1.19296	0.927846	0.988346	0.978783	0.960726	0.958554	0.968283	0.92459	0.932219	0.996759	1.02299	0.866223	0.803181	1.08388	0.923118	1.07394	0.523584	1.09448	1.07206	0.497328	0.773386	0.804934	0.867988	0.895209	0.91076	0.907052	0.952858	0.949879	0.967978	0.975595	1.01099	0.289514
2.33333	0.684504	0.912635	0.703969	0.718393	0.64242	0.500132	0.785626	0.845686	0.904381	0.559044	1.12719	0.848476	0.806132	1.07435	0.873373	1.18036	0.917242	1.16463	0.924436	0.989372	0.977359	0.969455	0.968156	0.976664	0.936782	0.941647	1.00857	1.02172	0.871112	0.813777	1.10776	0.930046	1.08522	0.521559	1.0836	1.08264	0.541854	0.790184	0.817009	0.906205	0.891568	0.894618	0.904609	0.939837	0.939599	0.987489	0.973493	1.00972	0.32941
2.5	0.70521	0.917095	0.705097	0.721588	0.683148	0.401321	0.775858	0.834728	0.887147	0.60053	1.13524	0.865613	0.816506	1.07477	0.867947	1.15073	0.921811	1.16153	0.918736	0.954051	0.976392	0.973251	0.981006	0.979491	0.933197	0.948299	1.00896	1.02406	0.873145	0.826267	1.10106	0.930707	1.08765	0.537534	1.09277	1.08113	0.624362	0.798632	0.832383	0.884742	0.901462	0.902659	0.891522	0.969493	0.932591	1.04157	0.97662	1.01763	0.347422
2.66667	0.697852	0.866274	0.739488	0.734075	0.620307	0.384892	0.788626	0.834379	0.888338	0.639837	1.13764	0.895694	0.832851	1.10576	0.86552	1.20142	0.929369	1.1655	0.932727	0.983081	0.976966	0.975552	0.978302	0.982572	0.935594	0.943011	1.00797	1.02075	0.881064	0.831939	1.11433	0.933759	1.09941	0.542696	1.09515	1.08047	0.608914	0.812773	0.815506	0.922234	0.895454	0.893257	0.914855	0.948126	0.955681	0.991163	0.974815	1.00406	0.267136
2.83333	0.704422	0.897029	0.73733	0.763163	0.785975	0.571828	0.802991	0.841001	0.893412	0.615848	1.13588	0.910603	0.826652	1.12531	0.862513	1.20844	0.938162	1.17078	0.928649	0.998794	0.974884	0.970924	0.979147	0.994228	0.934169	0.947375	1.00078	1.01579	0.885472	0.836559	1.10968	0.92444	1.09605	0.550495	1.08628	1.07047	0.653474	0.807618	0.807943	0.947446	0.897038	0.91298	0.93155	0.94721	0.959369	0.989566	0.973479	1.00461	0.331895
3	0.698345	0.843244	0.768056	0.781409	0.735177	0.741262	0.792565	0.835923	0.892749	0.581273	1.1228	0.87641	0.837641	1.12399	0.872363	1.19012	0.946114	1.19207	0.938694	0.965278	0.96908	0.979924	0.986702	0.988431	0.954014	0.949213	0.999431	1.01813	0.896075	0.846212	1.12088	0.933129	1.09263	0.567128	1.07645	1.05895	0.648685	0.809081	0.824303	0.936575	0.908054	0.906251	0.919164	0.948213	0.941932	0.976256	0.978434	1.0054	0.369518
3.16667	0.698455	0.834877	0.779992	0.78442	0.757523	0.530839	0.802965	0.856218	0.908369	0.583864	1.11602	0.855601	0.84025	1.13237	0.871569	1.19562	0.950238	1.17703	0.938628	0.990821	0.966006	0.987305	0.98825	0.985356	0.964353	0.951209	0.994143	1.01198	0.896405	0.847078	1.14014	0.927583	1.08162	0.573597	1.07004	1.04587	0.678331	0.818993	0.832931	0.929571	0.901884	0.894625	0.938303	0.952857	0.976083	0.915662	0.975201	1.00607	0.339697
3.33333	0.723545	0.801681	0.775604	0.83514	0.747617	0.502246	0.80419	0.867008	0.912322	0.572167	1.10942	0.878553	0.842238	1.11394	0.872612	1.13998	0.948946	1.17094	0.96343	0.98231	0.967063	0.987387	0.989269	0.982076	0.975322	0.956025	1.00031	1.01893	0.911932	0.860428	1.16555	0.94017	1.07717	0.579555	1.08136	1.05666	0.719387	0.824776	0.841098	0.907822	0.900709	0.909627	0.917113	0.964146	0.977515	0.931495	0.975908	1.00618	0.346115
3.5	0.728756	0.819711	0.761487	0.846061	0.76949	0.638974	0.811057	0.880681	0.921199	0.615569	1.09897	0.883316	0.844181	1.10811	0.88815	1.13495	0.9551	1.17059	0.982103	1.00993	0.965677	0.989997	0.9945	0.983435	0.972452	0.959909	0.992547	1.0191	0.924552	0.867338	1.15799	0.945802	1.07869	0.577972	1.07074	1.06242	0.691595	0.825352	0.819556	0.921471	0.899559	0.916537	0.92767	0.959393	0.982006	0.926986	0.972023	1.00206	0.365265
3.66667	0.683032	0.862865	0.748633	0.860508	0.810562	0.563278	0.819963	0.881819	0.932531	0.627013	1.09947	0.932852	0.868161	1.1005	0.877917	1.05259	0.946152	1.14164	0.977509	1.0701	0.970461	0.998977	0.988537	0.982545	0.972624	0.971509	0.987423	1.02362	0.917132	0.868243	1.16635	0.940062	1.06411	0.593256	1.06949	1.05671	0.740203	0.843285	0.846443	0.897222	0.90768	0.908227	0.932553	0.963611	0.966683	0.938407	0.972271	0.996385	0.438473
3.83333	0.668252	0.899104	0.76371	0.838882	0.796656	0.640723	0.817887	0.891652	0.95334	0.643714	1.08632	0.891518	0.858264	1.11052	0.883213	0.977581	0.946802	1.1142	0.981483	0.980939	0.974302	0.996131	0.9945	0.972355	0.968863	0.971287	1.00547	1.01963	0.917773	0.871882	1.15966	0.941565	1.04667	0.592938	1.05545	1.05342	0.736039	0.842238	0.841906	0.910427	0.901724	0.900227	0.927623	0.958027	0.991591	0.947444	0.970825	0.997633	0.505383
4	0.711345	0.899401	0.765239	0.849661	0.809629	0.556525	0.812758	0.882918	0.945339	0.611584	1.08491	0.877625	0.846951	1.12406	0.887626	1.04661	0.960762	1.14783	0.988503	0.995124	0.97748	1.00096	0.986693	0.979567	0.964474	0.971745	1.01547	1.01496	0.908094	0.881305	1.15998	0.943981	1.03591	0.593108	1.0507	1.04064	0.7211	0.850262	0.819726	0.904398	0.90573	0.905726	0.948424	0.956919	0.980171	0.947344	0.967911	1.00242	0.509078
4.16667	0.720102	0.91249	0.729413	0.865355	0.783633	0.639233	0.820785	0.883585	0.953475	0.609606	1.06604	0.908499	0.928012	1.14549	0.885874	1.03657	0.960291	1.15899	1.004	1.04406	0.969381	0.992601	0.981981	0.98259	0.969136	0.968973	1.00113	1.01117	0.905902	0.889481	1.13686	0.9503	1.04916	0.619172	1.03934	1.0589	0.703809	0.850924	0.845473	0.917611	0.920399	0.924433	0.958559	0.937663	1.00716	0.973287	0.973197	0.997897	0.502196
4.33333	0.713925	0.908383	0.713021	0.827333	0.766978	0.665771	0.841281	0.897067	0.958983	0.649695	1.05184	0.919845	0.914045	1.15144	0.895291	0.977171	0.95594	1.13076	1.00754	1.00356	0.981201	1.00719	0.998633	0.986521	0.977611	0.986107	1.02354	1.01888	0.912412	0.891721	1.13742	0.962053	1.04388	0.637239	1.03715	1.07152	0.680387	0.872196	0.869504	0.915401	0.918704	0.912932	0.960576	0.948833	0.988552	0.978742	0.972033	0.995234	0.593716
4.5	0.724421	0.897445	0.736548	0.813226	0.760501	0.740011	0.820181	0.875537	0.940533	0.602315	1.04509	0.880112	0.916885	1.13645	0.88762	0.912935	0.95431	1.12314	1.00195	1.00737	0.968428	0.995477	0.993854	0.982553	0.973103	0.985629	1.0195	1.01878	0.917254	0.891648	1.14015	0.966895	1.04711	0.647311	1.02449	1.09021	0.712218	0.87924	0.86718	0.94084	0.922358	0.916193	0.977344	0.953952	1.01336	0.989253	0.981697	1.0004	0.634758
4.66667	0.752927	0.889958	0.742363	0.850091	0.803016	0.745704	0.823713	0.87893	0.942488	0.645884	1.0272	0.878803	0.921499	1.10905	0.878324	0.943537	0.945575	1.08474	0.985988	0.959932	0.97692	1.00712	1.00251	0.983214	0.977733	0.99017	1.01619	1.01447	0.925744	0.891262	1.12179	0.973016	1.04558	0.664049	1.01064	1.09039	0.651406	0.891878	0.864221	0.919255	0.926155	0.925367	0.96657	0.957939	1.03106	1.01399	0.976617	0.996626	0.546983
4.83333	0.761326	0.888399	0.735007	0.851719	0.781248	0.802108	0.82672	0.871189	0.950886	0.598718	1.0296	0.89071	0.922063	1.06382	0.87415	0.934138	0.945716	1.08577	0.990171	0.962903	0.975581	1.00235	0.999783	0.994176	0.957765	0.986431	1.0141	1.02102	0.930587	0.905839	1.10688	0.970961	1.05338	0.657729	1.00175	1.07998	0.592226	0.892363	0.88338	0.930662	0.923972	0.923164	0.955796	0.962154	1.01874	0.988925	0.978884	0.998907	0.590702
5	0.784811	0.923217	0.760065	0.858918	0.785894	0.7798	0.882165	0.889966	0.938053	0.643001	1.02301	0.907773	0.923595	1.0967	0.889278	0.89563	0.941499	1.05699	1.00081	0.974392	0.98791	1.0154	1.00293	0.999394	0.97796	0.99386	1.02333	1.01898	0.929552	0.890991	1.09468	0.963775	1.03657	0.682876	0.983839	1.06757	0.58721	0.883485	0.870288	0.931913	0.941911	0.912521	0.945165	0.960723	1.03062	1.02267	0.986496	1.0044	0.561872
5.16667	0.785961	0.938923	0.756041	0.871074	0.77596	0.766157	0.86531	0.880332	0.967211	0.625415	1.01831	0.883858	0.914169	1.08433	0.888937	0.878122	0.929392	1.03173	1.00579	0.963895	0.974956	1.01694	1.00113	0.993739	0.970762	0.987564	1.02838	1.02273	0.937415	0.905037	1.11347	0.978489	1.03742	0.691484	1.01276	1.04838	0.688881	0.913671	0.876068	0.921993	0.958953	0.94685	0.947322	0.973436	1.03775	1.04067	0.981428	1.00254	0.557599
5.33333	0.797383	0.91841	0.775934	0.864369	0.801663	0.818945	0.899264	0.895001	0.972653	0.662474	1.01648	0.893683	0.908321	1.08103	0.908615	0.855245	0.943769	1.03185	1.01796	0.963616	0.97181	1.00765	0.999189	0.983573	0.963443	0.984926	1.01716	1.01496	0.934161	0.902393	1.08442	0.95472	1.03194	0.689129	0.999389	1.03849	0.742916	0.906244	0.873472	0.924362	0.971771	0.940514	0.956619	0.969591	1.03764	1.04443	0.990236	1.00877	0.571139
5.5	0.808848	0.925353	0.788133	0.885356	0.818235	0.794386	0.894098	0.881489	0.961587	0.664237	1.00723	0.883824	0.908607	1.08463	0.925238	0.907755	0.944685	1.02154	1.01997	0.990991	0.993069	1.01694	1.00902	0.982349	0.975616	0.992305	1.02721	1.02326	0.940464	0.913963	1.08475	0.956208	1.0284	0.706642	0.994903	1.02708	0.78952	0.921574	0.930286	0.929685	0.959298	0.931021	0.977506	0.969773	1.06328	1.0227	0.980955	1.00464	0.59529
5.66667	0.809602	0.910122	0.802107	0.873625	0.82867	0.837874	0.912881	0.891071	0.976488	0.668222	1.0082	0.921756	0.939033	1.06707	0.931147	0.897279	0.951661	1.00949	1.0255	1.04306	0.976801	1.00089	0.993585	0.977474	0.972266	0.984133	1.0149	1.00502	0.937507	0.910001	1.0625	0.951462	1.02411	0.71817	0.998036	1.02497	0.770724	0.912355	0.92924	0.9307	0.975454	0.949354	0.982065	0.984481	1.07859	1.03844	0.988213	1.00462	0.677457
5.83333	0.814428	0.90634	0.802512	0.862987	0.860188	0.825831	0.928389	0.884864	0.978088	0.699793	1.00103	0.922328	0.946487	1.06468	0.928976	0.873522	0.957062	1.00569	1.01193	1.02134	0.982052	1.00792	1.00896	0.980822	0.982051	0.993477	1.02229	1.01389	0.936203	0.906964	1.07009	0.949032	1.01693	0.740617	0.998983	1.01021	0.835076	0.929234	0.93775	0.924024	0.972343	0.955937	0.996742	0.978409	1.07596	1.02953	0.98699	1.00583	0.65371
6	0.828207	0.945414	0.804514	0.896431	0.826443	0.711721	0.923954	0.891091	0.968791	0.68048	0.995912	0.89707	0.945024	1.08069	0.923639	0.90842	0.957717	0.970574	1.02243	0.990019	0.979575	0.996998	0.999105	0.974153	0.970955	0.979932	1.01866	1.00835	0.944584	0.912241	1.04839	0.958489	1.02019	0.825493	0.997398	1.0308	0.813012	0.932449	0.931702	0.945298	0.974733	0.949123	1.01578	0.955694	1.0727	0.993267	0.989742	1.00375	0.651497
6.16667	0.843249	0.931433	0.815206	0.877172	0.835008	0.753069	0.936131	0.905028	0.97094	0.667004	0.992417	0.911168	0.953557	1.06339	0.946666	0.878381	0.964629	0.997003	1.02986	0.98845	0.981039	0.998712	0.991263	0.975755	0.98451	0.973807	1.00796	1.00314	0.948087	0.918535	1.0703	0.964172	1.02164	0.816339	1.00032	1.03104	0.83796	0.944361	0.938104	0.958229	0.976627	0.956703	1.03714	0.968071	1.0595	1.00338	0.985587	1.00386	0.560813
6.33333	0.853375	0.931836	0.824077	0.883074	0.872947	0.673816	0.939569	0.901393	0.975237	0.602659	0.996284	0.936437	0.966031	1.06699	0.947232	0.873555	0.964876	1.00971	1.01556	1.0505	0.980809	0.996654	0.989664	0.987907	0.983918	0.971055	0.993941	1.00992	0.947924	0.92193	1.05001	0.974674	1.01623	0.819397	1.00718	1.02971	0.832214	0.955848	0.905963	0.942762	0.989273	0.95844	1.02402	0.978954	1.0818	0.98563	0.991558	1.00332	0.629448
6.5	0.865193	0.944312	0.825952	0.903839	0.896042	0.687323	0.949745	0.900682	0.967552	0.712656	0.991154	0.956629	0.972232	1.06202	0.947147	0.899838	0.965683	0.99692	1.00698	1.02009	0.973732	0.997597	0.99004	0.977809	0.973359	0.971298	0.991096	0.997934	0.946069	0.921282	1.02648	0.965915	1.01297	0.850721	0.990416	1.02183	0.864604	0.957372	0.933854	0.925272	1.0103	0.984624	1.01657	1.01075	1.07283	1.00463	0.996368	1.01021	0.725316
6.66667	0.880765	0.938174	0.847945	0.892663	0.844988	0.721447	0.972297	0.900811	0.967148	0.672361	0.991792	0.964379	0.992964	1.04935	0.95388	0.849251	0.962817	0.980297	1.00189	1.00716	0.962631	0.995237	0.985435	0.964956	0.969842	0.970766	0.985942	0.979794	0.955458	0.947335	1.03082	0.977073	1.0282	0.892544	1.00558	1.02195	0.886764	0.973805	0.928932	0.941124	1.00617	0.997857	1.0131	0.98962	1.04622	1.00705	0.996265	1.00736	0.758619
6.83333	0.88475	0.924713	0.831638	0.913962	0.879252	0.767249	0.999326	0.925795	0.97609	0.708159	0.987741	0.975909	1.00177	1.01112	0.963122	0.904153	0.963458	0.96761	1.00837	0.99792	0.968608	0.994901	0.989582	0.975409	0.978924	0.977086	0.987553	0.983549	0.954525	0.959264	1.02794	0.978293	1.02047	0.899451	1.00363	1.02562	0.889367	0.975549	0.918673	0.94404	1.00367	0.993235	0.992721	0.994467	1.00879	1.02997	0.989424	1.00315	0.653219
7	0.905268	0.909798	0.832717	0.91145	0.902787	0.784151	1.00179	0.935884	0.970726	0.677678	0.971427	0.934822	0.967117	1.00048	0.954513	0.896126	0.957101	0.954322	1.02332	1.04316	0.967748	0.980922	0.987458	0.974147	0.974088	0.966638	0.978876	0.991506	0.960748	0.974035	1.01762	0.982419	1.01267	0.913615	1.00766	1.02712	0.90718	0.985237	0.927898	0.954247	0.993659	0.999323	1.01945	0.982019	1.01309	1.02245	0.985944	0.998906	0.760574
7.16667	0.897894	0.930608	0.840763	0.921657	0.901769	0.85077	1.00541	0.943322	0.980903	0.718677	0.972141	0.953205	0.990035	1.00597	0.956069	0.895967	0.958754	0.947334	1.00575	0.998047	0.970258	0.983316	0.991263	0.976953	0.96872	0.974727	0.997252	0.991917	0.967097	0.979976	1.04577	0.999657	1.0186	0.932329	1.02009	1.03256	0.96407	0.995916	0.977469	0.947002	0.995851	1.01253	1.01414	0.990563	1.02101	1.02987	0.991721	0.996536	0.816967
7.33333	0.90111	0.92814	0.857145	0.922261	0.895829	0.936052	1.00811	0.936615	0.970759	0.659362	0.970212	0.980384	1.0013	1.02258	0.955494	0.972929	0.966795	0.97331	1.00409	1.04871	0.981237	0.988544	0.994771	0.982074	0.973676	0.984736	1.00247	0.992442	0.966511	0.972933	1.01407	0.995904	1.01185	0.925499	1.00378	1.0254	0.923378	0.991439	0.968847	0.969961	0.993361	1.01677	1.00922	0.981954	1.05969	1.02408	0.991181	1.00121	0.92113
7.5	0.904444	0.933519	0.897626	0.915454	0.914174	0.894057	1.01196	0.931825	0.984434	0.698037	0.965841	0.975831	0.996981	1.00266	0.969711	0.942868	0.974882	0.968198	1.01748	1.05968	0.97705	0.993717	0.999918	0.984443	0.978218	0.982379	0.998782	0.983894	0.970708	0.971236	1.01757	1.00727	1.00999	0.934908	1.00777	1.02346	0.97212	0.998872	0.952904	0.965746	0.994194	1.02645	0.9953	0.978481	1.02289	1.03294	0.987884	0.995736	0.948997
7.66667	0.917518	0.933308	0.90761	0.911196	0.952059	0.904668	1.00173	0.939322	0.984202	0.716514	0.967675	0.965146	0.998432	0.99038	0.974582	0.943093	0.981649	0.978121	1.01956	0.984518	0.979265	0.982174	0.989493	0.981891	0.976618	0.983658	1.00142	0.993248	0.98372	0.977083	1.01285	1.00859	1.01241	0.953272	1.00963	1.01729	0.99696	0.982197	0.967086	0.97628	0.994312	1.00793	0.991186	0.975787	1.03017	1.01321	0.992767	0.996465	0.949527
7.83333	0.924788	0.934958	0.919407	0.929486	0.955524	0.798482	0.985159	0.934574	0.984262	0.779409	0.968873	0.992007	1.01854	0.978943	0.983182	1.03021	0.991367	1.00422	1.03832	1.08395	0.98265	0.994653	1.00125	0.988861	0.979284	0.990737	1.00677	1.00217	0.982836	0.970591	0.992338	1.00312	1.01146	0.953673	1.00504	1.00193	0.961728	0.987305	0.953443	0.971714	0.994455	0.988384	1.01568	0.97833	1.03587	1.0118	0.9898	0.992453	0.922821
8	0.926861	0.933761	0.933536	0.942685	0.917038	0.842163	1.00502	0.956249	0.990744	0.804715	0.978962	1.00353	1.02783	0.975882	0.985639	1.00609	0.995317	0.997421	1.02223	1.0019	0.980671	0.991856	0.988408	0.989309	0.979683	0.986563	0.995749	1.00118	0.989131	0.984896	1.00553	1.01008	1.01655	0.963144	1.00517	1.00657	1.0071	0.99497	0.977692	0.979135	0.989627	0.999655	0.996626	0.972887	1.00268	1.02845	0.987848	0.991777	0.982863
8.16667	0.944846	0.938563	0.943082	0.950749	0.934585	0.892568	0.986601	0.94477	0.980963	0.830581	0.965578	0.954446	1.01354	0.980952	0.996354	1.0125	1.00498	0.994672	1.03032	1.00787	0.98785	0.991886	0.996862	0.992242	0.989884	0.99048	0.998185	1.0004	1.0058	0.994129	1.00155	1.01673	1.01163	0.95927	1.00374	1.00211	1.0234	0.996075	0.962706	0.98265	0.98806	1.00795	0.990074	1.01135	0.979784	1.01901	0.99653	0.993813	1.02653
8.33333	0.955434	0.940797	0.95734	0.962909	0.968505	0.903383	0.988752	0.949932	0.990542	0.917525	0.976119	0.96162	1.0259	1.02139	1.0002	0.989547	1.00584	1.01375	1.01025	1.00948	0.988661	0.993235	0.999922	0.999126	0.989256	0.998076	1.00142	0.998027	0.998408	0.992263	1.00206	1.00743	0.997171	0.975843	0.995073	0.997098	0.979761	0.995163	0.974627	0.998053	0.9905	1.01117	0.981042	0.993745	0.959155	0.992149	0.995814	0.991117	0.974363
8.5	0.961689	0.927384	0.978167	0.969346	0.942434	0.989123	0.973086	0.939338	0.988012	0.962744	0.981212	0.963953	1.03628	1.03528	1.00588	0.978487	1.00851	1.02168	0.986289	1.00171	1.00334	0.994833	1.00131	1.00247	1.0002	1.00142	1.00045	0.99285	1.01235	1.00496	0.998306	1.00766	0.996471	1.01255	0.996069	1.01171	0.976366	1.0098	1.00511	0.997875	1.00322	0.997628	1.01284	1.00583	0.955018	1.00052	1.00335	1.00451	0.929703
8.66667	0.971627	0.964867	0.980738	0.968259	0.956479	1.03248	0.99809	0.957932	0.997144	0.950827	0.982494	0.974212	1.01926	1.00209	1.01181	0.96224	1.00437	1.00624	0.97904	0.975685	1.00583	0.993931	1.00798	1.00533	1.00174	1.00589	1.00018	0.991183	1.01041	1.01137	1.0138	1.00087	0.995192	0.993726	1.00129	0.991375	1.03926	1.00402	1.03823	0.994069	1.00102	0.994995	0.98689	1.00618	0.972472	0.999592	1.00096	1.00348	1.00697
8.83333	0.979503	0.98787	0.999641	0.990455	0.968898	1.09606	1.01245	0.983968	0.993596	0.999637	1.04402	1.03741	0.953254	1.01992	1.00764	0.952755	0.996665	0.98392	0.972508	0.921293	1.00693	1.00987	0.995324	0.999751	1.01534	1.00281	0.997008	0.99166	1.01363	1.01376	1.00691	0.999244	0.992646	1.02429	1.0072	0.993738	1.01866	1.00165	1.02801	1.01594	0.998311	0.994334	1.01144	1.00986	0.996232	0.977485	1.00477	1.00748	1.00013
9	0.977856	1.0057	1.00772	1.01968	0.956522	1.13667	1.00708	0.997436	0.991576	0.950717	1.05575	1.01092	0.898824	1.02464	1.00633	1.01219	0.998833	0.993392	0.978285	1.01809	1.03084	1.01472	1.00655	1.01387	1.01091	1.01348	1.00141	1.00947	1.00962	1.02255	1.00603	0.999353	1.0009	1.0494	0.994431	0.996486	1.04295	1.01045	1.05348	1.02706	1.00877	1.00626	1.00605	1.00572	1.02735	0.958145	1.00866	1.00825	1.03576
9.16667	0.976964	1.00274	0.976914	1.00048	0.938463	1.13273	1.00232	1.00996	0.988901	0.94995	1.035	1.02853	0.988796	0.997977	1.01271	1.04451	1.01108	1.01262	0.972112	1.03135	1.0174	1.01469	1.00174	1.01153	1.02146	1.00806	1.00546	1.01562	0.997176	1.01494	0.991775	0.985246	0.993657	1.06734	0.999788	1.00268	0.987272	1.01615	1.02153	1.03558	1.00383	0.989159	1.02309	1.00542	1.02461	0.982368	1.00564	1.00611	1.10639
9.33333	0.990863	0.984859	0.993477	1.01568	1.00645	1.06408	1.00704	1.00988	0.994525	0.911944	1.02295	1.09497	1.04692	0.990581	1.01497	1.04667	0.998721	1.01558	0.98087	1.01197	1.00952	1.00899	0.997574	1.00631	1.02885	1.00571	0.990636	1.00318	0.993555	1.00736	0.980268	0.971841	0.986855	1.07729	0.989426	0.980045	0.987147	1.00217	1.02117	1.05338	1.01385	0.993618	1.03816	1.01476	1.05513	1.00158	1.00622	1.00849	1.15463
9.5	1.00602	1.001	0.993674	0.99735	0.990493	1.05996	1.01667	1.00706	1.00634	0.993356	1.0319	1.19618	1.08129	1.00892	1.03189	1.15074	1.0231	1.0438	1.00494	1.03597	1.01953	1.02349	1.00486	1.02361	1.04156	1.01936	0.996511	1.01091	0.988205	1.01228	0.998253	0.981986	0.992842	1.11211	0.999461	0.967616	1.04141	1.01665	1.05953	1.03062	1.00419	0.994395	1.02964	0.99663	1.06693	0.992241	1.00506	1.01416	1.11963
9.66667	1.00489	1.01343	0.988048	0.9837	1.00496	1.00479	1.00113	1.00196	1.00239	1.02694	1.05983	1.23488	1.1074	1.02872	1.03254	1.13615	1.01716	1.03229	0.998395	1.06137	1.01954	1.01505	1.00738	1.03266	1.04001	1.01446	1.00044	1.01395	0.998394	1.02857	0.996815	0.995608	0.993045	1.12831	1.02141	0.986144	0.917809	1.03176	1.05653	1.05464	1.02319	1.00701	1.017	1.02118	1.06495	1.01115	1.00853	1.01055	1.17241
9.83333	1.00094	1.00868	1.00013	0.991667	1.02861	0.91098	1.00534	1.01873	1.01365	1.07345	1.09832	1.33323	1.16795	1.01692	1.01894	1.14952	1.03403	1.07552	1.01722	1	1.02185	1.00854	1.00904	1.03364	1.04355	1.01061	1.01035	1.01592	0.946125	1.02223	0.981432	0.994907	1.00615	1.09923	0.976421	0.980198	0.740444	1.03475	1.037	1.06215	1.02912	1.0246	1.03676	1.04302	1.07295	1.01884	1.00571	1.00888	1.17859
10	1.05464	1.05353	1.0386	1.02255	1.07112	0.879167	0.996231	1.02946	1.00626	1.0442	1.14847	1.37635	1.20021	0.993681	1.00485	1.1759	1.02302	1.10243	1.01516	1.0828	1.02278	1.01503	1.0212	1.03585	1.05784	1.01534	1.01167	1.03024	0.947505	1.03472	0.960954	0.991489	1.00181	1.14089	0.943887	0.973321	0.513171	1.03432	1.05786	1.07746	1.03135	1.01963	1.03841	1.04551	1.01308	0.998898	1.0112	1.01005	1.28891
10.1667	1.075	1.04995	1.04288	1.04084	1.13557	0.693956	0.980568	1.04428	1.01761	1.13624	1.17992	1.41757	1.23422	0.973098	0.995641	1.11108	1.00184	1.07727	1.00394	1.06061	1.02206	1.01945	1.02191	1.05269	1.06116	1.01521	1.01774	1.02994	0.947915	1.03775	0.957023	0.985722	0.997043	1.13987	0.934645	0.963151	0.475178	1.03766	1.01475	1.07959	1.03047	1.01374	1.04355	1.06474	1.058	1.02027	1.00314	1.01094	1.43007
10.3333	1.04094	1.04745	1.02159	1.0541	1.06074	0.870383	0.922328	1.0122	0.996406	0.997534	1.20772	1.40557	1.23933	0.980693	1.00998	1.07805	1.00307	1.03696	0.979039	0.982799	1.04002	1.02354	1.05406	1.11736	1.12873	1.04529	1.04778	1.05506	0.945949	1.0344	0.96511	0.977178	0.992139	1.13557	0.944016	0.957806	0.514037	1.03406	1.00159	1.07923	1.03014	1.0127	1.03919	1.07385	1.04086	1.02204	1.01485	1.01758	1.47443
10.5	1.01022	1.02569	1.00714	1.00426	1.07199	0.778974	0.916656	0.990193	0.987014	0.946782	1.2494	1.43939	1.2873	1.06796	1.02213	1.21276	1.00878	1.04428	0.984001	0.995931	1.04307	1.01633	1.05602	1.12276	1.12598	1.05439	1.0405	1.04129	0.941445	1.02047	0.9778	0.967315	0.983779	1.13433	0.949457	0.951106	0.618854	1.04286	1.01967	1.07004	1.0302	1.0179	1.04667	1.08158	1.04763	1.00125	1.0074	1.01274	1.51527
10.6667	1.00816	1.0426	1.0127	1.00028	1.0464	0.871496	0.882433	0.964736	0.937861	0.885155	1.27764	1.44235	1.31151	1.15386	1.01609	1.55826	1.0118	1.05182	0.989238	1.00149	1.03927	1.01826	1.06043	1.12306	1.14504	1.06436	1.04589	1.0372	0.956263	1.04589	0.996657	0.973302	0.998634	1.14485	0.970376	0.961706	0.719534	1.0827	1.04687	1.10176	1.05381	1.02688	1.09181	1.11553	1.12268	1.01864	1.02018	1.00719	1.43402
10.8333	1.01433	1.03066	0.991303	0.962877	1.09746	0.688774	0.921912	1.02181	0.998369	1.06798	1.30079	1.42855	1.32088	1.25549	1.02201	2.29875	1.02455	1.10545	1.01326	1.03156	1.02845	1.02436	1.04966	1.08976	1.1111	1.04523	1.03835	1.02535	0.969127	1.06282	1.03534	0.98569	1.01245	1.12888	0.973535	0.954284	0.818553	1.1499	1.098	1.08329	1.0818	1.05821	1.28663	1.1535	1.19976	1.0258	1.02833	1.00444	1.48263
11	0.978412	1.03807	0.925144	0.893251	1.11559	0.619278	0.912676	0.98871	1.00076	0.970784	1.32025	1.41519	1.3278	1.29945	1.01391	3.16133	1.01599	1.11883	1.05634	0.995006	1.0303	1.0234	1.03799	1.07028	1.09218	1.04838	1.04224	1.02541	0.993639	1.10957	1.08984	0.991766	1.04521	1.18293	0.992412	0.969781	0.908018	1.24768	1.13459	1.09481	1.12739	1.07282	1.70913	1.21546	1.20962	1.022	1.02682	1.00223	1.5271
11.1667	0.973164	1.08593	0.958077	0.906852	1.18983	0.589948	0.890611	0.971219	0.982071	1.14247	1.35026	1.43859	1.36763	1.31255	1.03524	3.98286	1.03473	1.1556	1.09209	1.04315	1.03388	1.02668	1.0364	1.06334	1.07734	1.04139	1.05612	1.03031	1.02744	1.16154	1.16103	0.981656	1.10846	1.26907	0.991323	0.99276	0.918188	1.37126	1.17202	1.10493	1.19764	1.10018	2.32946	1.30994	1.35511	1.03664	1.04253	1.00781	1.50478
11.3333	0.962654	1.15342	0.955436	0.961929	1.26838	1.08919	0.835614	0.93353	0.947936	0.993524	1.36078	1.41207	1.34642	1.34041	1.05509	4.46574	1.03981	1.19187	1.11469	1.08573	1.0463	1.0296	1.08227	1.06679	1.08593	1.04662	1.10416	1.04807	1.06649	1.21787	1.26349	0.97849	1.21822	1.3472	1.00863	1.00472	0.999973	1.4922	1.23109	1.1501	1.30273	1.14597	3.0809	1.43154	1.51306	1.07259	1.06908	1.01532	1.56845
11.5	0.944191	1.22166	0.940808	1.0509	1.30071	1.32797	0.840492	0.907984	0.913077	0.980485	1.36782	1.37595	1.33803	1.32857	1.07459	4.988	1.05742	1.26207	1.15704	1.10014	1.06209	1.02892	1.13777	1.07219	1.07945	1.05779	1.1904	1.0648	1.11037	1.2469	1.38934	0.983593	1.32604	1.44382	1.02639	1.03922	1.02377	1.56714	1.25669	1.18047	1.41105	1.18838	3.65682	1.50424	1.63318	1.08435	1.08527	1.02285	1.76532
11.6667	0.921483	1.29987	0.988366	1.16097	1.36453	1.35082	0.846001	0.881269	0.895513	0.969815	1.39949	1.41377	1.39486	1.32073	1.09289	5.16449	1.0701	1.31231	1.16031	1.16244	1.08285	1.02656	1.21443	1.08392	1.07931	1.08086	1.33555	1.07924	1.15512	1.29562	1.52771	0.980146	1.43037	1.54245	1.02224	1.05153	1.08674	1.62528	1.25304	1.21559	1.55423	1.2785	4.21948	1.5656	1.68677	1.10976	1.10614	1.03426	2.17745
11.8333	0.924254	1.36302	1.07977	1.26126	1.38836	1.52911	0.846437	0.880716	0.903212	1.20886	1.40567	1.37178	1.36377	1.28521	1.11324	5.43444	1.08044	1.37854	1.18355	1.1806	1.10414	1.05478	1.30321	1.08175	1.10436	1.11932	1.47813	1.09278	1.20311	1.33197	1.72334	0.992765	1.52473	1.59609	1.03457	1.06412	1.16766	1.68832	1.3248	1.21085	1.69958	1.3507	4.55802	1.57432	1.70931	1.10665	1.11229	1.04242	2.53419
12	0.949262	1.41048	1.14043	1.33982	1.4081	1.64991	0.837	0.880109	0.887767	1.33494	1.4192	1.36526	1.36974	1.26004	1.12788	5.72551	1.08945	1.4485	1.20383	1.22966	1.10709	1.06413	1.37157	1.08603	1.10607	1.14891	1.55857	1.10996	1.24246	1.36072	1.89501	0.999198	1.58376	1.65622	1.05534	1.07886	1.1671	1.72607	1.33092	1.22007	1.84433	1.46979	4.72105	1.54528	1.75992	1.11228	1.11889	1.04818	2.90719
12.1667	0.964197	1.46267	1.1697	1.39162	1.42313	1.75032	0.850414	0.904839	0.899965	1.51562	1.43532	1.35811	1.40102	1.26885	1.14058	5.83228	1.09688	1.51248	1.22323	1.29421	1.12131	1.07455	1.4105	1.09241	1.10595	1.18474	1.61592	1.12229	1.25804	1.36779	2.04013	0.995494	1.59494	1.68288	1.05473	1.07493	1.20691	1.78261	1.32741	1.23226	1.97163	1.55089	4.85017	1.52958	1.75184	1.12948	1.12553	1.05724	3.24847
12.3333	0.982212	1.50967	1.18122	1.42592	1.41312	1.86987	0.877367	0.926808	0.911966	1.57193	1.44905	1.33516	1.40297	1.25187	1.14779	5.9978	1.11599	1.59937	1.2648	1.39556	1.12916	1.0806	1.4261	1.09455	1.09425	1.20562	1.6645	1.11126	1.27722	1.3814	2.20694	1.00322	1.63903	1.70052	1.07252	1.08048	1.21163	1.82112	1.37523	1.21232	2.10581	1.5955	4.99643	1.48107	1.77611	1.12183	1.12321	1.06398	3.61868
12.5	0.995126	1.52283	1.24183	1.45643	1.37016	1.91312	0.889693	0.966929	0.928651	1.61478	1.4523	1.33152	1.41828	1.24403	1.14042	6.17948	1.11551	1.64147	1.26878	1.44063	1.15288	1.08401	1.469	1.10619	1.09631	1.24046	1.70799	1.12103	1.29139	1.37225	2.34394	1.01644	1.66311	1.71245	1.08254	1.07155	1.252	1.82253	1.38182	1.2524	2.24863	1.71238	5.12015	1.49808	1.84707	1.15757	1.13656	1.07952	3.80957
12.6667	1.01684	1.53816	1.22973	1.52306	1.36767	1.85298	0.905566	1.00657	0.935872	1.60526	1.4537	1.31423	1.41325	1.24117	1.14471	6.34104	1.12198	1.69807	1.25239	1.44106	1.15779	1.08694	1.47224	1.10293	1.0954	1.25663	1.71504	1.1216	1.29902	1.4191	2.47178	1.03764	1.68161	1.73757	1.10124	1.06702	1.28688	1.86504	1.40371	1.28165	2.36457	1.80586	5.17657	1.50386	1.88383	1.18825	1.14516	1.09048	4.03799
12.8333	1.05871	1.57815	1.20843	1.5766	1.38103	1.78779	0.941661	1.05456	0.950879	1.63918	1.45823	1.32446	1.41173	1.23982	1.15161	6.60498	1.1253	1.76699	1.2652	1.54482	1.16948	1.09134	1.47971	1.10841	1.0921	1.26894	1.71937	1.11149	1.28631	1.42049	2.50713	1.03436	1.6864	1.76587	1.1197	1.0719	1.3501	1.86795	1.42605	1.25158	2.4706	1.86671	5.15459	1.47051	1.87932	1.20281	1.15562	1.09718	4.30596
13	1.07648	1.57759	1.1848	1.62192	1.36484	1.77165	0.982233	1.10855	0.98143	1.71205	1.45947	1.28066	1.38506	1.24097	1.15466	6.85571	1.14094	1.85975	1.26602	1.68585	1.18143	1.10795	1.49017	1.11821	1.10557	1.29009	1.757	1.11536	1.25058	1.4581	2.5752	1.03447	1.68786	1.78029	1.12428	1.06862	1.36868	1.89603	1.42008	1.2745	2.52984	1.91813	5.25641	1.46549	1.90539	1.17913	1.16138	1.1126	4.62218
13.1667	1.0855	1.57492	1.16788	1.65816	1.36362	1.665	1.02799	1.17149	1.00747	1.74378	1.45509	1.25103	1.35827	1.21386	1.16255	6.89849	1.13819	1.88327	1.27914	1.76399	1.18278	1.10269	1.48568	1.11207	1.09949	1.29101	1.75131	1.11392	1.20114	1.45644	2.64514	1.03722	1.68825	1.75229	1.12426	1.06168	1.46453	1.92671	1.43228	1.27661	2.66204	2.02695	5.29152	1.48157	1.90732	1.19516	1.16023	1.11516	4.73972
13.3333	1.11141	1.58772	1.14118	1.67089	1.37948	1.72836	1.07518	1.19677	1.02444	1.81681	1.46592	1.25551	1.36036	1.1865	1.16975	6.85129	1.14533	1.90894	1.29027	1.83133	1.17334	1.09721	1.46686	1.10945	1.09685	1.28102	1.71751	1.10342	1.16882	1.48421	2.69926	1.05025	1.67787	1.71692	1.13671	1.05941	1.50338	1.94324	1.43756	1.28642	2.70667	2.0064	5.24349	1.49321	1.87151	1.20549	1.15964	1.12275	4.83912
13.5	1.12554	1.61964	1.11605	1.72336	1.47171	1.66884	1.09109	1.21303	1.03299	1.80016	1.4831	1.25553	1.36098	1.19134	1.15996	6.77782	1.14825	1.92388	1.27494	1.9502	1.19071	1.11444	1.49349	1.12838	1.10777	1.30949	1.73366	1.11009	1.15083	1.46944	2.66645	1.06062	1.68116	1.72172	1.11508	1.06379	1.51379	1.93809	1.45362	1.32193	2.76435	2.06794	5.2494	1.50244	1.87456	1.19106	1.18045	1.11602	4.83919
13.6667	1.12246	1.63512	1.10114	1.75046	1.40688	1.63103	1.11037	1.24632	1.04413	1.8181	1.47384	1.2414	1.33459	1.1809	1.15708	6.74793	1.15104	1.98914	1.25897	2.09764	1.18352	1.10597	1.48156	1.1317	1.11396	1.30942	1.72075	1.10221	1.12155	1.50795	2.69047	1.06925	1.70926	1.69305	1.12457	1.06212	1.5606	1.95772	1.48161	1.36268	2.82339	2.16201	5.25105	1.51858	1.86384	1.23725	1.18296	1.12451	4.95839
13.8333	1.11732	1.66826	1.08238	1.76066	1.41342	1.59954	1.13865	1.26404	1.05445	1.85968	1.47251	1.20265	1.2992	1.17005	1.15228	6.65917	1.14889	2.05548	1.271	2.11822	1.19209	1.11015	1.47536	1.14211	1.11303	1.31584	1.71592	1.10277	1.10325	1.51931	2.69263	1.07394	1.70563	1.68736	1.12451	1.04965	1.59407	1.97356	1.46622	1.36775	2.90437	2.22482	5.30552	1.51205	1.85303	1.23179	1.18347	1.13281	5.08372
14	1.08351	1.69361	1.09851	1.79493	1.43355	1.60784	1.15379	1.28433	1.06489	1.9192	1.48363	1.18174	1.27861	1.18361	1.14346	6.54136	1.13986	2.04893	1.26854	2.17597	1.20293	1.1249	1.47675	1.15533	1.12864	1.33429	1.73646	1.11233	1.08675	1.54112	2.70065	1.06493	1.7044	1.66607	1.13403	1.03966	1.57318	1.97584	1.51061	1.39693	2.91442	2.26244	5.21765	1.5229	1.84049	1.21334	1.181	1.13245	5.17358
14.1667	1.05991	1.68396	1.11261	1.8021	1.4054	1.59464	1.18529	1.32179	1.07717	2.00071	1.49645	1.17942	1.2803	1.20505	1.14298	6.59407	1.13897	2.0119	1.26447	2.22713	1.20885	1.13031	1.45753	1.14764	1.13211	1.34006	1.73491	1.0939	1.07239	1.52851	2.68346	1.06542	1.66936	1.67776	1.11563	1.04758	1.42309	1.9625	1.50247	1.3884	2.94718	2.32192	5.40537	1.52433	1.79297	1.25166	1.20102	1.14925	5.16747
14.3333	1.07958	1.6578	1.12251	1.75339	1.38913	1.64445	1.16007	1.30759	1.04611	1.93264	1.4929	1.18683	1.26338	1.20128	1.13328	6.56621	1.13392	2.04351	1.29389	2.27863	1.19012	1.12939	1.4662	1.14456	1.13933	1.35271	1.7489	1.09247	1.05856	1.52096	2.67918	1.07068	1.67678	1.68528	1.11438	1.03966	1.49064	1.96023	1.52307	1.40615	2.98904	2.39665	5.43077	1.54963	1.7802	1.242	1.20489	1.14059	5.00931
14.5	1.09466	1.67124	1.10996	1.80149	1.40552	1.54894	1.17417	1.31742	1.05907	1.92872	1.49904	1.14389	1.24136	1.21886	1.13539	6.72004	1.13647	2.04251	1.30712	2.38626	1.20214	1.12891	1.46502	1.16679	1.15687	1.36037	1.74408	1.10773	1.0437	1.52297	2.65258	1.06872	1.69775	1.66257	1.09626	1.01324	1.46353	1.98372	1.52497	1.43193	2.97702	2.40929	5.17867	1.56118	1.81403	1.20908	1.21663	1.13096	4.81219
14.6667	1.07869	1.67981	1.10455	1.77499	1.42713	1.49659	1.1959	1.35158	1.06984	1.99528	1.5043	1.15343	1.24553	1.18447	1.12723	6.7171	1.12346	1.95009	1.31998	2.31226	1.21256	1.14084	1.45977	1.17169	1.15884	1.37826	1.75036	1.1064	1.03998	1.52777	2.67395	1.07497	1.70798	1.67053	1.08258	0.998988	1.5053	2.00444	1.53997	1.44545	2.97934	2.44877	4.81294	1.54653	1.76047	1.25655	1.21927	1.13033	4.81815
14.8333	1.06705	1.67249	1.11321	1.76843	1.42325	1.54235	1.1948	1.35029	1.05177	1.94338	1.51397	1.13826	1.24429	1.19907	1.13041	6.75632	1.125	1.98272	1.33144	2.45638	1.20141	1.14667	1.45773	1.16749	1.15064	1.3721	1.72751	1.10791	1.02892	1.52403	2.66182	1.07784	1.73389	1.681	1.0698	0.983895	1.41059	2.00596	1.56443	1.45875	2.9756	2.40069	4.47132	1.58163	1.77208	1.26658	1.21916	1.13167	4.93857
15	1.06153	1.6928	1.10908	1.77336	1.39809	1.54758	1.211	1.38133	1.05942	1.91816	1.509	1.14452	1.22388	1.21498	1.10687	6.80624	1.11556	1.99395	1.36134	2.40477	1.20496	1.14787	1.4652	1.16858	1.14723	1.39274	1.74033	1.10964	1.01316	1.54093	2.63269	1.08419	1.76487	1.65175	1.05383	0.975748	1.4254	1.98514	1.5571	1.47075	2.95247	2.3505	4.20496	1.56414	1.77859	1.28058	1.23272	1.12994	4.84994
15.1667	1.07431	1.69449	1.13599	1.80243	1.39996	1.56763	1.19738	1.38287	1.04645	1.89589	1.51101	1.12011	1.20503	1.20822	1.08202	6.7782	1.10261	1.9092	1.36903	2.50964	1.21074	1.15689	1.46921	1.17105	1.13827	1.3834	1.73719	1.11804	1.0093	1.56342	2.6694	1.09425	1.8007	1.6179	1.0672	0.972257	1.50431	2.00743	1.64092	1.47518	2.95948	2.3986	4.12391	1.51729	1.80074	1.27909	1.21488	1.12438	4.76902
15.3333	1.07678	1.68388	1.12348	1.7956	1.38498	1.50331	1.22322	1.40935	1.06604	1.88591	1.49654	1.09802	1.18645	1.20704	1.07589	6.83206	1.08741	1.91238	1.36273	2.53163	1.21529	1.16968	1.48321	1.18564	1.13507	1.41352	1.73548	1.13009	0.990077	1.54974	2.63983	1.09031	1.84092	1.63545	1.05406	0.96166	1.40032	1.99955	1.62478	1.4913	2.96687	2.38057	4.00543	1.49118	1.8011	1.27741	1.21149	1.12906	4.8051
15.5	1.09254	1.69342	1.13233	1.81731	1.41905	1.47082	1.21864	1.39619	1.04818	1.8528	1.50501	1.11693	1.19325	1.19085	1.05586	6.85703	1.06855	1.89272	1.38151	2.51492	1.21395	1.17346	1.48151	1.18273	1.12905	1.41798	1.71954	1.1237	0.980939	1.57498	2.60274	1.08969	1.83262	1.64331	1.05054	0.954943	1.366	2.01968	1.62523	1.46847	2.93684	2.36282	3.84082	1.49271	1.8127	1.26053	1.19543	1.11071	4.73918
15.6667	1.10574	1.70964	1.15972	1.82078	1.43368	1.5167	1.22094	1.42416	1.04261	1.85625	1.48726	1.05619	1.14852	1.20373	1.0362	7.02761	1.05568	1.86923	1.38485	2.6132	1.21744	1.19001	1.48696	1.17732	1.12466	1.43191	1.73346	1.1223	0.977959	1.58926	2.59452	1.10492	1.82849	1.62752	1.05974	0.938247	1.39388	2.07183	1.60999	1.46031	2.9365	2.35837	3.74012	1.45096	1.804	1.27841	1.21173	1.11469	4.81641
15.8333	1.10453	1.6989	1.14202	1.81517	1.46116	1.49368	1.19839	1.41026	1.02545	1.82816	1.50788	1.03634	1.13627	1.19925	1.01885	7.05555	1.03624	1.86865	1.36763	2.55186	1.20939	1.20204	1.47187	1.17571	1.12064	1.42722	1.70485	1.11539	0.959297	1.58195	2.53027	1.09597	1.814	1.61028	1.04831	0.921123	1.36461	2.06265	1.55093	1.43389	2.91816	2.31175	3.65569	1.41786	1.78966	1.25747	1.18798	1.1128	4.71025
16	1.12982	1.70704	1.13584	1.83431	1.45199	1.50015	1.21988	1.43279	1.04645	1.84274	1.52833	1.05566	1.1597	1.19911	1.01043	7.05461	1.02181	1.91864	1.35072	2.57094	1.20075	1.19785	1.46728	1.17096	1.10561	1.42229	1.69599	1.11533	0.964059	1.5833	2.53452	1.10816	1.85823	1.63263	1.03427	0.920523	1.36541	2.09028	1.57127	1.44326	2.92738	2.34409	3.52922	1.41029	1.8069	1.25766	1.19669	1.11736	4.6454
16.1667	1.15741	1.70297	1.15321	1.85383	1.43334	1.49634	1.2079	1.42594	1.03019	1.82004	1.53228	1.01632	1.13267	1.17987	1.00262	7.05016	1.00252	1.92049	1.34944	2.60114	1.19724	1.19228	1.463	1.15985	1.09901	1.42751	1.69532	1.11432	0.953252	1.56899	2.49233	1.08953	1.87744	1.61058	1.02005	0.9136	1.33387	2.06293	1.60344	1.44158	2.91111	2.36594	3.50469	1.41599	1.77621	1.25144	1.20021	1.12636	4.73031
16.3333	1.15798	1.69209	1.17619	1.86346	1.43054	1.55442	1.21598	1.44821	1.04379	1.84841	1.54479	1.0098	1.13268	1.15494	0.99372	7.15238	0.996425	1.90192	1.3407	2.6175	1.19919	1.21012	1.47353	1.16096	1.11031	1.44523	1.69624	1.12865	0.949101	1.56874	2.50165	1.09792	1.9124	1.65189	1.02966	0.930051	1.35846	2.09493	1.62313	1.44131	2.87132	2.33958	3.44205	1.4067	1.75126	1.23878	1.19831	1.12235	4.63377
16.5	1.15831	1.70149	1.21794	1.86653	1.42143	1.52083	1.19851	1.43035	1.03107	1.88093	1.53632	0.977117	1.10497	1.16262	0.980922	7.16021	0.980658	1.85012	1.32166	2.52973	1.1957	1.20148	1.46222	1.14111	1.09572	1.43997	1.68461	1.12437	0.9422	1.5616	2.47394	1.09019	1.91814	1.65185	1.00693	0.940619	1.30531	2.08674	1.60441	1.42465	2.79487	2.22404	3.3928	1.40788	1.74446	1.24922	1.19486	1.11001	4.46688
16.6667	1.15658	1.68607	1.22394	1.84292	1.41515	1.45495	1.21318	1.44038	1.03555	1.81856	1.56111	1.02057	1.1421	1.1639	0.969321	7.21717	0.964654	1.84368	1.31049	2.55438	1.2016	1.21082	1.44697	1.1463	1.1025	1.46918	1.68839	1.13783	0.941005	1.56939	2.46458	1.09745	1.95742	1.63183	0.993615	0.933916	1.34263	2.12373	1.58888	1.43796	2.73598	2.29086	3.44854	1.34973	1.7659	1.22847	1.19585	1.10528	4.31491
16.8333	1.1913	1.6901	1.23767	1.85113	1.35821	1.47017	1.21311	1.43323	1.03022	1.78523	1.55318	0.978833	1.1395	1.17879	0.960033	7.28839	0.944989	1.83882	1.29193	2.59696	1.19861	1.19297	1.43298	1.14368	1.10298	1.44974	1.66771	1.12157	0.929493	1.55885	2.42145	1.09362	1.92931	1.63532	0.984671	0.924803	1.27794	2.10007	1.61701	1.48017	2.69743	2.24585	3.35648	1.34618	1.75234	1.2495	1.19952	1.09996	4.31808
17	1.22039	1.73206	1.2194	1.85885	1.37701	1.50092	1.20307	1.42665	1.03903	1.85133	1.54737	0.959082	1.13408	1.18152	0.950759	7.37958	0.933549	1.83542	1.28618	2.56612	1.18698	1.20241	1.4381	1.12583	1.10898	1.45368	1.65038	1.12479	0.934257	1.57242	2.39915	1.09742	1.93004	1.63377	0.977215	0.925663	1.25905	2.1164	1.6314	1.51719	2.64243	2.23869	3.31179	1.32269	1.72338	1.26819	1.2127	1.10189	4.37825
17.1667	1.23397	1.71968	1.1991	1.8556	1.40244	1.4487	1.22505	1.45042	1.06349	1.97884	1.55132	0.967841	1.13662	1.17024	0.946127	7.48852	0.939263	1.8442	1.29051	2.68247	1.182	1.19855	1.43492	1.12203	1.1254	1.46897	1.63729	1.12603	0.935075	1.60045	2.38618	1.09999	1.93033	1.632	0.975364	0.941685	1.25296	2.13157	1.64018	1.52346	2.59464	2.21459	3.25116	1.27884	1.7234	1.26985	1.20685	1.09112	4.38803
17.3333	1.26296	1.72748	1.20226	1.87326	1.41867	1.45256	1.22596	1.45506	1.06432	1.93402	1.55965	0.968484	1.13891	1.15498	0.939328	7.48241	0.928805	1.82729	1.27621	2.67363	1.17294	1.19172	1.41572	1.10043	1.12189	1.46342	1.62733	1.11977	0.926287	1.5758	2.36053	1.09135	1.93323	1.6358	0.950442	0.95149	1.1959	2.13633	1.6287	1.55913	2.53217	2.17945	3.30852	1.27715	1.70879	1.2491	1.19929	1.087	4.28633
17.5	1.26303	1.71307	1.2383	1.87757	1.44663	1.51535	1.21361	1.45239	1.05161	1.98408	1.54791	0.960727	1.11803	1.16238	0.936998	7.45089	0.931583	1.81142	1.2766	2.65226	1.17798	1.20995	1.41429	1.08703	1.1205	1.47846	1.63105	1.12115	0.919128	1.58847	2.32602	1.08725	1.946	1.63885	0.940019	0.952529	1.214	2.16554	1.63746	1.53392	2.48726	2.16336	3.29268	1.25042	1.68317	1.25938	1.20029	1.08263	4.20323
17.6667	1.28926	1.70108	1.20899	1.85506	1.43429	1.53266	1.19943	1.45472	1.05004	1.98731	1.54481	0.968525	1.10637	1.18693	0.911616	7.49695	0.916423	1.73767	1.26225	2.68202	1.17702	1.20999	1.41408	1.08451	1.12884	1.47485	1.60552	1.12729	0.907475	1.57455	2.26235	1.06996	1.95101	1.6529	0.92113	0.953545	1.15029	2.16061	1.60122	1.48135	2.39747	2.08705	3.2978	1.2517	1.67891	1.24816	1.1912	1.07653	4.0588
17.8333	1.29954	1.7015	1.21493	1.86118	1.40361	1.54748	1.19417	1.43977	1.04771	2.0173	1.54953	0.964559	1.10577	1.17297	0.89278	7.45649	0.900819	1.74863	1.26089	2.67405	1.16814	1.20783	1.39211	1.06774	1.12428	1.46514	1.58204	1.12446	0.905218	1.58117	2.27441	1.06947	1.96575	1.63478	0.926666	0.96083	1.20897	2.2334	1.6421	1.50063	2.36002	2.06965	3.25651	1.2664	1.68259	1.3137	1.19428	1.07627	3.96176
18	1.2909	1.70611	1.22773	1.86614	1.35266	1.52035	1.17303	1.41759	1.03598	1.93967	1.55367	0.948651	1.11322	1.16971	0.874976	7.36574	0.901835	1.77788	1.25761	2.72309	1.16203	1.20126	1.37428	1.05748	1.12494	1.45933	1.56597	1.12049	0.885273	1.55168	2.22955	1.03627	1.9658	1.58927	0.910607	0.956433	1.12129	2.19202	1.62061	1.48844	2.29541	2.00336	3.34683	1.25753	1.67486	1.27586	1.18188	1.06748	3.89595
18.1667	1.29391	1.72423	1.26027	1.89109	1.38741	1.50737	1.16846	1.42462	1.03644	1.93953	1.55596	0.926175	1.10827	1.16903	0.863902	7.39959	0.898649	1.7788	1.22997	2.66664	1.15436	1.20386	1.36089	1.03008	1.11431	1.44988	1.57714	1.11951	0.875483	1.55295	2.2511	1.04129	1.99038	1.5725	0.911821	0.952428	1.15288	2.2207	1.65005	1.51305	2.2886	2.06377	3.29596	1.27949	1.67608	1.32148	1.18998	1.07563	3.6265
18.3333	1.31288	1.72028	1.26984	1.90023	1.36186	1.55017	1.16965	1.42779	1.03999	2.04117	1.54125	0.891204	1.08687	1.15188	0.846979	7.31783	0.891123	1.75713	1.22366	2.67399	1.17173	1.21779	1.37165	1.01915	1.12604	1.4636	1.56724	1.13419	0.879652	1.58749	2.28237	1.03997	1.98641	1.55274	0.911254	0.957855	1.25343	2.24854	1.67239	1.49919	2.28952	2.09488	3.24234	1.2509	1.62534	1.33467	1.19776	1.07058	3.46417
18.5	1.32315	1.72279	1.2928	1.9391	1.34253	1.62144	1.16832	1.42561	1.04215	2.03652	1.55429	0.90325	1.11547	1.16718	0.834735	7.42257	0.896167	1.77948	1.20051	2.7014	1.16015	1.20593	1.35757	1.0157	1.11349	1.45029	1.56881	1.12733	0.860959	1.56251	2.26423	1.02612	1.96019	1.54095	0.897204	0.954142	1.15543	2.21387	1.63231	1.4876	2.28385	2.10658	3.16165	1.25429	1.60742	1.33927	1.19604	1.06678	3.40334
18.6667	1.31925	1.7314	1.286	1.93892	1.37804	1.62451	1.17497	1.43892	1.04644	2.08977	1.54013	0.887761	1.12516	1.14641	0.812695	7.20926	0.879739	1.7403	1.17815	2.65193	1.15189	1.21297	1.36139	0.998298	1.12653	1.45175	1.55121	1.12426	0.863566	1.5648	2.29025	1.02823	1.96064	1.56318	0.899999	0.955494	1.12597	2.23023	1.63411	1.46527	2.31059	2.13186	3.18333	1.22964	1.62513	1.3312	1.19536	1.06851	3.35619
18.8333	1.32123	1.71961	1.3266	1.91166	1.39209	1.52782	1.18589	1.45187	1.06348	2.16043	1.54433	0.87905	1.10811	1.14831	0.80282	7.2381	0.882394	1.75038	1.16556	2.69254	1.14	1.2109	1.35344	0.982293	1.12326	1.44302	1.54239	1.11092	0.859504	1.56193	2.29275	1.02776	1.99522	1.55517	0.897451	0.950825	1.16959	2.23112	1.6487	1.46139	2.32516	2.10319	3.20878	1.25482	1.59253	1.3168	1.1948	1.06493	3.32772
19	1.31274	1.72594	1.30403	1.91064	1.41584	1.5436	1.1896	1.46433	1.05225	2.16472	1.53745	0.849926	1.11674	1.13727	0.794515	7.22768	0.874434	1.757	1.15956	2.65815	1.13759	1.21255	1.3532	0.974793	1.12774	1.44953	1.51096	1.12701	0.850368	1.55423	2.23378	1.02335	1.98927	1.52109	0.89095	0.962529	1.13524	2.22208	1.6487	1.44589	2.35145	2.12219	3.21905	1.23781	1.60153	1.35263	1.18725	1.06123	3.27271
19.1667	1.32117	1.74947	1.32829	1.95072	1.38111	1.55578	1.19042	1.45902	1.05107	2.1982	1.55543	0.891443	1.12672	1.15206	0.779633	7.16124	0.865944	1.72288	1.16521	2.66449	1.12804	1.21969	1.34526	0.972487	1.1252	1.44497	1.51434	1.13766	0.84526	1.53525	2.22125	1.03048	1.99387	1.50769	0.892382	0.946086	1.14529	2.20493	1.66075	1.38381	2.30928	2.07115	3.21142	1.22675	1.58083	1.33374	1.1788	1.05699	3.2532
19.3333	1.31759	1.73706	1.3499	1.93737	1.38025	1.58152	1.16808	1.43845	1.03054	2.17203	1.53745	0.862473	1.10248	1.166	0.771745	7.18753	0.86508	1.70928	1.13929	2.67803	1.10877	1.22915	1.33142	0.955865	1.11477	1.44233	1.48836	1.13206	0.846042	1.52825	2.16156	1.03375	1.9785	1.49548	0.86688	0.964871	1.09086	2.19114	1.63757	1.35619	2.30464	2.07329	3.27202	1.21865	1.57922	1.33153	1.16836	1.05852	3.23807
19.5	1.3343	1.76941	1.34941	1.94177	1.38793	1.56021	1.16358	1.44134	1.03588	2.22592	1.52441	0.847006	1.09283	1.11788	0.781091	7.23155	0.874078	1.75219	1.14071	2.75898	1.08492	1.24835	1.3258	0.944605	1.12423	1.44188	1.48971	1.14196	0.842433	1.51778	2.1312	1.03354	1.97029	1.49022	0.870887	0.976596	1.0784	2.17919	1.63903	1.33408	2.31516	2.07692	3.28194	1.22642	1.59745	1.30742	1.1754	1.05384	3.23589
19.6667	1.33588	1.75607	1.3296	1.91706	1.35227	1.4557	1.16463	1.43881	1.0458	2.22544	1.5151	0.828908	1.09019	1.12639	0.769415	7.22623	0.867639	1.70369	1.10445	2.73738	1.06558	1.2754	1.35246	0.942086	1.1209	1.46742	1.48198	1.14472	0.84681	1.55567	2.10163	1.03939	1.98037	1.48464	0.851433	1.00004	1.01798	2.17857	1.64318	1.30458	2.36123	2.10198	3.41168	1.19471	1.64864	1.31657	1.1521	1.05571	3.12438
19.8333	1.33307	1.77342	1.33586	1.9202	1.37807	1.53575	1.15957	1.44372	1.04132	2.2195	1.51696	0.84796	1.1114	1.16399	0.748933	7.13167	0.853938	1.67762	1.04463	2.61611	1.03027	1.29138	1.33824	0.925765	1.10963	1.45643	1.47145	1.14967	0.848155	1.5479	2.13087	1.04467	2.00522	1.49474	0.855159	1.01048	1.05098	2.17366	1.67187	1.2969	2.373	2.14043	3.43665	1.20698	1.67021	1.30504	1.15237	1.05582	3.18091
20	1.35403	1.78991	1.35242	1.95436	1.36852	1.45725	1.1533	1.43557	1.04336	2.07682	1.52023	0.83871	1.09602	1.15324	0.749484	7.03053	0.862847	1.71252	1.02366	2.67378	1.02122	1.31268	1.35317	0.920827	1.12059	1.4698	1.48225	1.15948	0.832419	1.53227	2.07244	1.02903	1.97979	1.49644	0.829683	1.01138	0.941223	2.14324	1.62057	1.28535	2.47165	2.19274	3.46228	1.23881	1.66915	1.35492	1.16789	1.05795	3.13557
20.1667	1.32933	1.76636	1.31762	1.97596	1.40335	1.25438	1.15465	1.46152	1.06621	2.05881	1.52646	0.861535	1.1077	1.16117	0.741796	6.96682	0.853841	1.66219	0.986506	2.63352	0.97972	1.29788	1.33909	0.910166	1.11598	1.44891	1.45406	1.15118	0.831369	1.53143	2.04379	1.02939	1.99809	1.47392	0.81733	1.03588	0.918691	2.11719	1.64211	1.27277	2.44822	2.13681	3.53303	1.1962	1.65174	1.29544	1.15402	1.04915	3.07201
20.3333	1.32661	1.76008	1.30505	1.96536	1.37446	1.55425	1.25596	1.51327	1.00495	1.91532	1.5253	0.858024	1.11404	1.137	0.728537	6.91365	0.850679	1.69693	0.928028	2.66921	0.950422	1.32216	1.34051	0.897998	1.11019	1.45281	1.46038	1.14808	0.824375	1.52274	2.00196	1.02408	1.98524	1.46065	0.805487	1.02182	0.809896	2.11541	1.62827	1.22822	2.44397	2.12891	3.51443	1.17586	1.62464	1.24806	1.14063	1.04785	2.909
20.5	1.32735	1.76031	1.33059	1.92356	1.36471	1.56887	1.15008	1.50143	1.09802	2.20284	1.51901	0.851545	1.10207	1.12974	0.721779	6.92045	0.846798	1.68148	0.882354	2.62448	0.914576	1.3557	1.32565	0.898597	1.12858	1.45482	1.47467	1.16095	0.83166	1.54022	2.00346	1.03505	2.01396	1.44112	0.826211	1.03169	0.873478	2.16943	1.62658	1.21839	2.45899	2.18389	3.47236	1.20778	1.60704	1.24839	1.14809	1.04088	2.71758
20.6667	1.32614	1.78462	1.34162	1.92807	1.38382	1.43933	1.1344	1.50304	1.09013	2.13285	1.51367	0.848457	1.08955	1.11213	0.712566	6.87645	0.845754	1.6982	0.841948	2.58066	0.8765	1.33437	1.30545	0.892712	1.12934	1.45392	1.44589	1.1497	0.829745	1.52934	1.98175	1.0323	2.00812	1.40708	0.836604	1.02505	0.953371	2.1629	1.5881	1.17321	2.48231	2.22889	3.4525	1.1978	1.58357	1.23275	1.14322	1.03975	2.67295
20.8333	1.34634	1.78628	1.30807	1.9128	1.35249	1.53143	1.1655	1.53175	1.10933	2.23119	1.53274	0.867673	1.10888	1.1136	0.703714	6.73884	0.835794	1.65956	0.806464	2.6024	0.84889	1.32188	1.30467	0.884921	1.12395	1.44456	1.43609	1.14441	0.82775	1.52221	1.93824	1.03804	2.02356	1.43462	0.830924	1.03651	0.88147	2.15381	1.59198	1.15315	2.49029	2.23341	3.32259	1.18296	1.56629	1.20659	1.143	1.04333	2.58371
21	1.37201	1.81197	1.36286	1.97495	1.39628	1.46169	1.17291	1.52918	1.11264	2.20013	1.53583	0.831861	1.09464	1.08661	0.697956	6.81382	0.838527	1.63786	0.772027	2.58048	0.839184	1.32167	1.3008	0.88083	1.14125	1.44594	1.44687	1.13855	0.830445	1.50724	1.951	1.04248	2.05179	1.44348	0.83616	1.05604	0.828417	2.17872	1.6056	1.15238	2.50165	2.24467	3.30312	1.19743	1.58881	1.18776	1.13167	1.04065	2.43892
21.1667	1.37404	1.81678	1.29929	1.93701	1.36632	1.45537	1.18071	1.50698	1.10711	2.18501	1.54301	0.827454	1.09273	1.05097	0.692951	6.89981	0.838068	1.70342	0.756533	2.56762	0.822936	1.30509	1.2922	0.870055	1.13913	1.44395	1.42997	1.13082	0.828812	1.50838	1.95276	1.04102	2.0376	1.43402	0.820378	1.06629	0.78675	2.15976	1.5774	1.14692	2.49618	2.34121	3.26127	1.18695	1.5545	1.17267	1.12864	1.03698	2.33027
21.3333	1.38756	1.82423	1.33826	1.94407	1.34354	1.53945	1.19021	1.52818	1.1022	2.14774	1.53877	0.850775	1.09751	1.06898	0.679654	6.91003	0.840932	1.6783	0.742124	2.50977	0.831539	1.31107	1.28765	0.869999	1.15539	1.45215	1.43209	1.13743	0.820191	1.48947	1.9433	1.03747	2.04069	1.4302	0.833475	1.07073	0.817854	2.15415	1.58295	1.14981	2.48199	2.35149	3.20151	1.1877	1.52164	1.19132	1.12048	1.02433	2.18367
21.5	1.3998	1.80403	1.35086	1.95014	1.32939	1.58638	1.22086	1.53917	1.12765	2.19358	1.53752	0.857164	1.11044	1.07001	0.672627	6.99816	0.834479	1.63574	0.719807	2.44958	0.810292	1.30267	1.27658	0.861662	1.14316	1.44853	1.43561	1.13533	0.825006	1.49864	1.94693	1.05462	2.06687	1.43105	0.842576	1.08508	0.830597	2.17929	1.62234	1.148	2.54927	2.4315	3.14728	1.16533	1.50054	1.22552	1.12657	1.0251	2.09925
21.6667	1.41114	1.83367	1.37299	2.00355	1.35981	1.60826	1.25311	1.55696	1.14342	2.21446	1.53898	0.838692	1.12858	1.09277	0.680428	7.0636	0.837858	1.65096	0.708978	2.52213	0.805874	1.2921	1.25626	0.846647	1.12807	1.44153	1.42491	1.13138	0.811911	1.49466	1.94296	1.06213	2.08168	1.40436	0.847447	1.09898	0.807672	2.16728	1.59164	1.12932	2.49828	2.49291	3.17444	1.17192	1.50733	1.2056	1.10988	1.02268	1.9346
21.8333	1.39538	1.8235	1.3934	2.00449	1.36986	1.57498	1.28504	1.57621	1.15067	2.17124	1.52393	0.824747	1.11184	1.08786	0.663122	7.02494	0.82829	1.61495	0.685917	2.43659	0.807702	1.29985	1.26444	0.845934	1.15714	1.45213	1.43173	1.12512	0.811024	1.48777	1.96403	1.07008	2.12469	1.42923	0.855411	1.10939	0.844204	2.19945	1.58071	1.10327	2.52815	2.48856	3.17427	1.17197	1.50616	1.24459	1.10651	1.02202	1.86154
22	1.38828	1.81821	1.37767	1.98476	1.36087	1.53275	1.32113	1.60548	1.15791	2.2581	1.53541	0.850158	1.12198	1.07551	0.656611	7.09252	0.825068	1.62025	0.683302	2.38728	0.793348	1.28157	1.24407	0.82937	1.16134	1.44693	1.40501	1.10567	0.814655	1.48364	1.97649	1.09244	2.13066	1.43641	0.86566	1.11245	0.783897	2.1962	1.60022	1.07081	2.53998	2.47119	3.10642	1.16237	1.48225	1.22275	1.10967	1.01671	1.76794
22.1667	1.39435	1.81043	1.3888	1.96486	1.31377	1.47692	1.37283	1.64078	1.1891	2.3583	1.53744	0.849937	1.13819	1.06418	0.643371	7.13348	0.819623	1.61018	0.673661	2.40797	0.794227	1.26643	1.23446	0.824187	1.17498	1.44448	1.41462	1.10089	0.819699	1.49719	1.99038	1.11025	2.14663	1.41863	0.861003	1.12466	0.767223	2.21538	1.57804	1.06147	2.53174	2.42367	3.09687	1.11507	1.4369	1.23206	1.09709	1.01224	1.63366
22.3333	1.40456	1.79098	1.35731	1.90926	1.28624	1.55828	1.38492	1.63026	1.19086	2.3322	1.51735	0.829596	1.12055	1.09724	0.629429	7.02681	0.81248	1.55378	0.664886	2.40201	0.799603	1.2562	1.22663	0.825189	1.18766	1.44863	1.40871	1.10118	0.814766	1.4853	1.95968	1.10359	2.12399	1.42939	0.856989	1.14577	0.782703	2.17067	1.52472	1.07847	2.57664	2.49901	3.01482	1.13061	1.44428	1.24417	1.10002	1.00531	1.59611
22.5	1.40353	1.84296	1.39269	1.94452	1.28058	1.56006	1.38632	1.62121	1.18143	2.33355	1.51569	0.835271	1.12036	1.08748	0.626092	6.95907	0.815298	1.5733	0.667198	2.4459	0.798303	1.25764	1.23151	0.824542	1.20114	1.45231	1.40713	1.10702	0.82248	1.47617	2.01109	1.12661	2.12449	1.45647	0.886017	1.16736	0.85489	2.16567	1.57855	1.06281	2.57331	2.55911	2.93779	1.15441	1.42045	1.30233	1.0921	1.01177	1.46838
22.6667	1.40156	1.85456	1.4418	1.88904	1.29744	1.439	1.40517	1.64575	1.19616	2.33379	1.51091	0.825188	1.13076	1.07195	0.617566	6.9878	0.815424	1.56236	0.687452	2.46462	0.80633	1.25554	1.21746	0.826908	1.21371	1.45256	1.40656	1.10909	0.819167	1.46315	2.02208	1.12483	2.12967	1.43144	0.87143	1.18065	0.81012	2.14614	1.54252	0.999787	2.54414	2.56902	2.9259	1.11674	1.39827	1.2757	1.08486	1.00893	1.41001
22.8333	1.40086	1.83686	1.43446	1.87975	1.3057	1.47949	1.41308	1.64646	1.1923	2.37395	1.52369	0.830486	1.13281	1.06171	0.618155	7.04706	0.825679	1.56487	0.68332	2.51686	0.795737	1.24127	1.20068	0.813431	1.22605	1.45044	1.3959	1.10413	0.825849	1.4967	2.07886	1.14027	2.15879	1.38346	0.893283	1.19326	0.83278	2.16418	1.54093	0.978868	2.53109	2.63161	2.85941	1.1139	1.38967	1.26351	1.08738	1.01377	1.40154
23	1.39338	1.80128	1.41182	1.8541	1.29809	1.45001	1.42471	1.64288	1.20355	2.36506	1.52922	0.831375	1.11362	1.03494	0.608078	7.05046	0.816857	1.54743	0.683291	2.4528	0.802303	1.24326	1.18991	0.805323	1.23726	1.44323	1.38925	1.11126	0.821898	1.47964	2.08088	1.13187	2.12759	1.35185	0.891882	1.19083	0.82625	2.1257	1.53018	0.98249	2.46573	2.57434	2.82779	1.11012	1.33589	1.27253	1.06833	1.00824	1.3302
23.1667	1.38158	1.78342	1.40702	1.87061	1.30753	1.56324	1.43811	1.64036	1.2078	2.41822	1.53689	0.837054	1.1329	1.03746	0.604954	7.1459	0.818935	1.5233	0.689741	2.45781	0.806577	1.24687	1.18676	0.807538	1.24554	1.45359	1.40124	1.11177	0.824119	1.47931	2.12905	1.13535	2.11766	1.32615	0.916176	1.18442	0.908131	2.14186	1.57163	1.00812	2.49133	2.69113	2.81748	1.13967	1.33473	1.29822	1.07276	1.00295	1.29453
23.3333	1.37254	1.79539	1.40653	1.87372	1.30316	1.54103	1.4764	1.66538	1.2228	2.41223	1.54011	0.845163	1.12282	1.04009	0.596932	7.13397	0.818623	1.54417	0.690039	2.39615	0.804931	1.24131	1.18409	0.809592	1.26261	1.45387	1.40117	1.1138	0.830905	1.4567	2.10886	1.13415	2.09638	1.40158	0.903843	1.20479	0.810841	2.13677	1.52254	1.01646	2.5184	2.75983	2.7493	1.13197	1.33302	1.33185	1.06579	1.00705	1.24338
23.5	1.38466	1.84622	1.40793	1.8819	1.30755	1.54619	1.48295	1.64006	1.21568	2.36153	1.53416	0.835189	1.1098	1.00173	0.591234	7.07625	0.821056	1.55186	0.705322	2.38445	0.814693	1.23532	1.18973	0.809689	1.27386	1.45635	1.39359	1.1178	0.824927	1.4593	2.12609	1.13755	2.07594	1.41112	0.925831	1.19442	0.831055	2.12699	1.54765	1.04059	2.49326	2.72768	2.66087	1.11166	1.32764	1.27813	1.05092	0.997683	1.20629
23.6667	1.37832	1.83587	1.39431	1.87177	1.25668	1.56449	1.48945	1.66738	1.19858	2.36103	1.52948	0.837118	1.11084	1.01584	0.577919	7.13919	0.827918	1.52678	0.699515	2.41485	0.816342	1.23418	1.17474	0.796136	1.28596	1.46346	1.39256	1.11392	0.822254	1.44711	2.07819	1.11384	2.07498	1.38382	0.901585	1.18397	0.777499	2.11338	1.51978	0.995816	2.50912	2.68368	2.67419	1.10088	1.2991	1.27693	1.03631	0.989779	1.17037
23.8333	1.37952	1.83864	1.37519	1.85852	1.28143	1.59351	1.50416	1.67445	1.20766	2.46328	1.52895	0.842718	1.10908	1.01381	0.57499	7.28606	0.829246	1.52999	0.706182	2.40412	0.817857	1.23171	1.17407	0.799193	1.29616	1.46415	1.3892	1.11871	0.828081	1.43702	2.07244	1.11099	2.06604	1.38819	0.904363	1.18893	0.721865	2.09224	1.53132	1.00101	2.51611	2.66936	2.68051	1.13159	1.31789	1.30676	1.03425	0.989688	1.1248
24	1.37524	1.80933	1.38431	1.84918	1.23164	1.57602	1.52374	1.66968	1.21123	2.43456	1.53532	0.853702	1.12549	1.00162	0.563185	7.3087	0.824115	1.53353	0.712766	2.42438	0.829051	1.21448	1.18	0.804822	1.29408	1.46885	1.38163	1.12598	0.827565	1.43474	2.07451	1.11703	2.07817	1.37323	0.912706	1.20157	0.78918	2.10121	1.53406	1.04189	2.50261	2.62105	2.68669	1.13961	1.30143	1.34666	1.03472	0.99471	1.05803
24.1667	1.36796	1.82853	1.37154	1.86531	1.25932	1.71681	1.51303	1.6622	1.18939	2.50523	1.52653	0.831588	1.11	1.00176	0.561445	7.22902	0.827934	1.52942	0.707675	2.442	0.83245	1.21131	1.17199	0.799791	1.30076	1.47202	1.38493	1.12145	0.823818	1.41661	2.07196	1.10217	2.07437	1.38711	0.909837	1.20322	0.734197	2.06633	1.5218	1.07667	2.52952	2.63752	2.70234	1.13327	1.29348	1.36607	1.03285	0.99384	0.976884
24.3333	1.36499	1.84576	1.38574	1.86067	1.24257	1.68634	1.50931	1.65853	1.19936	2.56188	1.52137	0.814851	1.0862	0.994195	0.550919	7.16482	0.82535	1.50401	0.706529	2.39338	0.831177	1.18376	1.1588	0.797659	1.2942	1.46313	1.37399	1.11929	0.821524	1.40911	2.06237	1.09527	2.07793	1.40295	0.903539	1.20621	0.701154	2.03605	1.50762	1.05782	2.49036	2.62745	2.70623	1.14697	1.30626	1.34825	1.02395	0.987083	0.958577
24.5	1.3799	1.86258	1.41994	1.88025	1.23965	1.74539	1.49022	1.66961	1.20678	2.50279	1.5342	0.8419	1.09847	0.988977	0.546178	7.32079	0.827301	1.52444	0.702543	2.36858	0.836301	1.17183	1.15992	0.797715	1.30054	1.46808	1.38567	1.12781	0.82622	1.43946	2.10561	1.10665	2.11428	1.39479	0.927506	1.22944	0.723965	2.0592	1.51829	1.079	2.47869	2.61304	2.757	1.15521	1.30385	1.3454	1.01431	0.989473	0.957107
24.6667	1.38018	1.8476	1.43013	1.8601	1.24183	1.71425	1.47852	1.64357	1.19111	2.48246	1.53464	0.831181	1.09025	0.973586	0.540265	7.15031	0.824469	1.48987	0.707298	2.34526	0.83214	1.1607	1.15375	0.788378	1.31226	1.45439	1.37553	1.12442	0.827723	1.41631	2.07871	1.10026	2.08168	1.39492	0.91378	1.2213	0.698265	2.02228	1.49138	1.09557	2.52358	2.6302	2.73298	1.15816	1.30212	1.32264	1.01502	0.990013	0.948728
24.8333	1.36268	1.80851	1.3866	1.82968	1.26166	1.74129	1.48825	1.65623	1.20331	2.49701	1.53257	0.819206	1.05949	0.972607	0.531739	7.19299	0.827179	1.4597	0.710928	2.29194	0.833244	1.14468	1.15147	0.790313	1.31909	1.44951	1.36671	1.13175	0.821055	1.41641	2.03942	1.08887	2.0626	1.41548	0.896692	1.22993	0.645566	1.99294	1.49777	1.08082	2.54787	2.62318	2.72953	1.19575	1.31717	1.33837	1.0074	0.992585	0.891898
25	1.36871	1.8041	1.39702	1.82937	1.24084	1.67133	1.45189	1.62663	1.17227	2.56131	1.52892	0.803351	1.06341	0.978973	0.527117	7.18478	0.826641	1.49475	0.701086	2.33244	0.84665	1.15328	1.15897	0.7924	1.31994	1.46783	1.37156	1.12766	0.827308	1.41394	2.05677	1.10025	2.07946	1.39039	0.926423	1.24255	0.729187	2.01446	1.46939	1.10051	2.56824	2.68023	2.68931	1.19924	1.30805	1.34631	1.01279	0.992905	0.884738
25.1667	1.37956	1.80262	1.4231	1.82423	1.23691	1.72386	1.44766	1.60984	1.17406	2.51603	1.53089	0.810376	1.06642	0.966225	0.520269	7.14161	0.826204	1.48666	0.699992	2.29953	0.843982	1.14314	1.15897	0.787157	1.32778	1.4617	1.38476	1.13659	0.815293	1.40987	2.01754	1.08521	2.04215	1.39807	0.891738	1.23361	0.666829	1.96927	1.4882	1.09461	2.58201	2.66418	2.71333	1.18997	1.30977	1.34006	1.00498	0.989836	0.883754
25.3333	1.37475	1.8148	1.44157	1.7746	1.198	1.66587	1.44953	1.62305	1.18256	2.41056	1.52253	0.801078	1.05274	0.983433	0.50878	7.07922	0.83029	1.50092	0.705779	2.27657	0.846107	1.1352	1.15491	0.790639	1.32217	1.44518	1.3691	1.11921	0.83146	1.41412	2.06092	1.08876	2.03045	1.394	0.91441	1.25317	0.677858	2.00628	1.47988	1.08983	2.57175	2.71574	2.718	1.1973	1.31115	1.34848	1.00388	0.995908	0.963768
25.5	1.39584	1.82005	1.46675	1.80398	1.22305	1.71456	1.42316	1.63516	1.17949	2.43642	1.51224	0.785615	1.04134	0.994335	0.507568	7.17002	0.839649	1.56207	0.714188	2.3232	0.842655	1.1269	1.15595	0.796869	1.33674	1.44255	1.37419	1.1193	0.826957	1.41106	2.08119	1.08233	2.03956	1.42478	0.901399	1.25473	0.63522	1.99609	1.46973	1.09759	2.51376	2.7229	2.72395	1.2249	1.34711	1.33549	0.998794	0.996652	0.89574
25.6667	1.38446	1.82512	1.48061	1.80004	1.23279	1.70167	1.41732	1.63215	1.17684	2.46391	1.52777	0.784471	1.02016	0.993213	0.507663	7.23869	0.843281	1.57904	0.727587	2.26298	0.85076	1.11242	1.1526	0.79765	1.34413	1.44454	1.37201	1.11668	0.835884	1.42135	2.10298	1.08797	2.06759	1.44579	0.913327	1.27763	0.709666	2.02686	1.51569	1.10561	2.50539	2.77976	2.71325	1.23473	1.33495	1.35021	0.980126	0.99386	0.865745
25.8333	1.38699	1.81431	1.4728	1.81963	1.22553	1.62634	1.4155	1.6399	1.16734	2.4978	1.57951	0.799706	1.01852	1.01415	0.499727	7.12584	0.837851	1.54973	0.726591	2.30311	0.850913	1.10356	1.14627	0.800683	1.34134	1.4446	1.38513	1.10019	0.832137	1.40432	2.10294	1.09139	2.06737	1.42847	0.918465	1.27366	0.723939	2.03312	1.48435	1.09931	2.51819	2.74359	2.71184	1.21433	1.34381	1.32997	0.972286	0.992807	0.856553
26	1.36981	1.77545	1.44802	1.77813	1.17096	1.64121	1.41954	1.64133	1.16801	2.4877	1.55953	0.778459	0.997465	1.01342	0.487198	7.04089	0.833683	1.53824	0.724936	2.2028	0.850193	1.10343	1.14113	0.802406	1.32995	1.45337	1.36241	1.11366	0.833216	1.39441	2.08833	1.08651	2.04659	1.42862	0.910905	1.27625	0.697673	2.00172	1.4857	1.09926	2.5288	2.73498	2.77378	1.22096	1.34851	1.336	0.974943	0.993815	0.811838
26.1667	1.37266	1.77991	1.47007	1.76134	1.20254	1.70327	1.44334	1.64857	1.18439	2.53397	1.56273	0.74747	0.963039	1.01583	0.486266	7.07952	0.832329	1.55826	0.717658	2.18662	0.861995	1.11439	1.143	0.807145	1.34219	1.46194	1.37948	1.11328	0.843637	1.40814	2.10706	1.08976	2.06818	1.44692	0.922246	1.28598	0.716916	2.02436	1.47999	1.10567	2.52767	2.73851	2.80193	1.24788	1.33376	1.36032	0.975554	0.999052	0.808809
26.3333	1.37844	1.78372	1.4832	1.76145	1.19903	1.75317	1.46267	1.67031	1.18954	2.51129	1.55661	0.757561	0.98705	1.02275	0.47987	7.02376	0.835911	1.58554	0.714044	2.24287	0.867964	1.11111	1.14127	0.808305	1.34859	1.45773	1.37656	1.10799	0.841173	1.39813	2.08452	1.08557	2.05494	1.4739	0.912337	1.2839	0.701058	2.01889	1.46299	1.11031	2.49907	2.78683	2.81314	1.25913	1.32627	1.36726	0.973101	0.99458	0.803817
26.5	1.37949	1.77349	1.47544	1.76633	1.20598	1.77329	1.41853	1.65773	1.18248	2.53643	1.55879	0.789406	1.03156	1.01701	0.478718	7.09893	0.837882	1.58045	0.715158	2.20886	0.863637	1.10252	1.13415	0.811933	1.35019	1.44809	1.38184	1.10654	0.843925	1.41394	2.08691	1.0991	2.07632	1.45607	0.926533	1.31323	0.768055	2.05341	1.45203	1.10096	2.46475	2.76467	2.84843	1.2397	1.30373	1.31332	0.957334	0.99186	0.861059
26.6667	1.37952	1.79838	1.50996	1.78198	1.19319	1.82215	1.42499	1.65375	1.16987	2.54553	1.54434	0.797261	1.0359	1.02575	0.477863	7.01327	0.836008	1.60483	0.722229	2.19703	0.869116	1.11961	1.14109	0.819511	1.37578	1.45254	1.38804	1.10872	0.851151	1.41154	2.09721	1.0987	2.08935	1.46505	0.946368	1.32776	0.811509	2.06071	1.47214	1.10458	2.47146	2.80405	2.85258	1.24815	1.31704	1.34892	0.968747	0.994404	0.900022
26.8333	1.37699	1.782	1.52567	1.77271	1.20056	1.80978	1.43544	1.65302	1.16973	2.5039	1.55391	0.775427	1.01395	1.00434	0.47539	7.16302	0.84256	1.65186	0.728885	2.32456	0.868072	1.11564	1.1338	0.816744	1.36476	1.45356	1.38154	1.11224	0.854019	1.41826	2.06475	1.10126	2.08893	1.46307	0.940234	1.33641	0.814033	2.07812	1.47481	1.08446	2.44352	2.78622	2.86635	1.25744	1.29646	1.35457	0.9633	1.0039	0.851626
27	1.35642	1.74922	1.48572	1.72908	1.16898	1.8597	1.43787	1.64145	1.17743	2.53016	1.59508	0.795739	1.04146	1.00272	0.466954	6.97715	0.842619	1.64291	0.717338	2.30395	0.858999	1.11011	1.13571	0.821043	1.35867	1.44591	1.37374	1.11604	0.855004	1.41696	2.03023	1.08509	2.06004	1.46182	0.921738	1.3447	0.721912	2.06998	1.47306	1.08164	2.42871	2.81531	2.93207	1.25403	1.30074	1.34804	0.937976	1.00176	0.89618
27.1667	1.3518	1.77191	1.50372	1.72948	1.16627	1.80144	1.44782	1.62877	1.17182	2.56555	1.59223	0.814477	1.04275	1.00784	0.461343	6.93514	0.842282	1.60728	0.730685	2.23069	0.869691	1.11558	1.15105	0.829654	1.38115	1.46702	1.39279	1.12146	0.860424	1.42685	2.0211	1.09193	2.06983	1.45797	0.927643	1.34571	0.738342	2.08534	1.48749	1.11413	2.47023	2.93317	2.94145	1.29997	1.30931	1.35459	0.926903	1.00745	0.937681
27.3333	1.34343	1.76969	1.49884	1.74687	1.15023	1.7419	1.47499	1.63886	1.18112	2.5616	1.57619	0.835226	1.0429	0.975753	0.455794	6.90071	0.843494	1.57149	0.724252	2.21234	0.866924	1.1106	1.14977	0.824252	1.37519	1.47702	1.38162	1.13224	0.865929	1.42742	2.05114	1.09133	2.07479	1.48824	0.948706	1.37173	0.802723	2.10397	1.49748	1.0897	2.40042	2.87808	3.034	1.30647	1.34197	1.30919	0.914204	1.00561	0.922679
27.5	1.35356	1.7938	1.49617	1.78827	1.15698	1.82836	1.48645	1.6374	1.19361	2.58508	1.5608	0.821719	1.02441	0.989964	0.449954	6.94214	0.841579	1.57091	0.716574	2.13917	0.867145	1.10767	1.15648	0.828027	1.39344	1.47995	1.37582	1.13432	0.874559	1.41204	2.06824	1.08532	2.06505	1.48578	0.955035	1.37369	0.816342	2.09239	1.51276	1.08341	2.40366	2.89966	2.9954	1.31542	1.33188	1.30519	0.906994	1.00112	0.97795
27.6667	1.36082	1.79233	1.5269	1.82047	1.18592	1.85632	1.50892	1.65636	1.20079	2.58424	1.55913	0.833402	1.05002	0.990663	0.440937	6.91086	0.83998	1.5843	0.721682	2.16932	0.866572	1.09872	1.15366	0.82122	1.3852	1.47547	1.38206	1.12537	0.876914	1.41738	2.10604	1.0893	2.05373	1.46378	0.96805	1.37093	0.8736	2.10657	1.46435	1.07382	2.425	2.92463	2.97274	1.25308	1.34684	1.28829	0.90837	1.004	0.978638
27.8333	1.35802	1.78441	1.53592	1.80407	1.16982	1.75578	1.51635	1.65204	1.20318	2.60163	1.55295	0.804659	1.04089	0.996797	0.430067	6.8024	0.831625	1.53028	0.723016	2.01745	0.867003	1.08441	1.16067	0.830453	1.37585	1.47204	1.38487	1.1175	0.888407	1.43748	2.16158	1.10475	2.04985	1.47942	0.981838	1.3819	0.894963	2.12331	1.51343	1.06014	2.40564	2.91774	2.94433	1.22187	1.33055	1.26851	0.903045	0.997676	1.00502
28	1.3551	1.78129	1.53092	1.84078	1.13398	1.80737	1.52028	1.64782	1.19241	2.56686	1.54925	0.801194	1.04146	0.996816	0.431163	6.90485	0.839767	1.63974	0.72419	2.123	0.862795	1.09414	1.17041	0.831084	1.4063	1.49352	1.37469	1.12107	0.88764	1.43689	2.16715	1.09796	2.04891	1.48184	0.986959	1.39313	0.938207	2.10604	1.4929	1.08146	2.41413	2.91899	2.96484	1.22904	1.32624	1.24744	0.906366	0.994488	1.00952
28.1667	1.35288	1.7803	1.54341	1.8665	1.14274	1.90707	1.51939	1.63924	1.20235	2.56564	1.56229	0.841772	1.07071	0.99427	0.423843	6.87798	0.834368	1.62417	0.736156	2.05829	0.864612	1.082	1.17287	0.840553	1.38515	1.49039	1.38765	1.11416	0.890055	1.43281	2.15174	1.09028	2.0229	1.48797	0.987582	1.40325	0.998832	2.10517	1.52045	1.06054	2.40426	2.86833	2.87853	1.19208	1.38157	1.21428	0.897575	0.98711	0.957124
28.3333	1.3362	1.75729	1.50817	1.8478	1.12409	1.78971	1.51628	1.6207	1.19433	2.62643	1.56153	0.822092	1.07055	1.01267	0.420782	6.96584	0.842736	1.63913	0.739505	2.05742	0.85598	1.06925	1.15981	0.83108	1.37363	1.48756	1.36205	1.09968	0.886823	1.43744	2.17892	1.07681	2.01834	1.45351	0.982585	1.40237	1.08247	2.07704	1.51863	1.07595	2.41427	2.90817	2.84983	1.19097	1.38617	1.21653	0.893883	0.988176	0.978773
28.5	1.33369	1.74604	1.55077	1.84677	1.08646	1.85481	1.50119	1.60124	1.17997	2.53951	1.55196	0.80866	1.06581	1.0195	0.412456	6.98286	0.841129	1.66268	0.73822	2.02134	0.865025	1.07658	1.16954	0.834108	1.39829	1.50603	1.37581	1.11158	0.89435	1.43992	2.20069	1.08351	2.04073	1.4793	0.979076	1.40368	1.08575	2.0907	1.49828	1.05605	2.42534	2.97467	2.82685	1.19755	1.36021	1.19134	0.896684	0.990281	0.95308
28.6667	1.33656	1.76124	1.54749	1.87071	1.10063	1.87622	1.54142	1.6079	1.18253	2.49804	1.55748	0.838109	1.07729	1.02102	0.409074	7.01855	0.852361	1.69651	0.74452	2.08519	0.869602	1.06784	1.16599	0.835903	1.37682	1.50786	1.37811	1.11322	0.904373	1.44683	2.20588	1.0876	2.04905	1.45231	1.00145	1.41037	1.14046	2.11503	1.53587	1.05549	2.40922	2.90613	2.85687	1.17292	1.35464	1.20404	0.892276	0.988843	1.03652
28.8333	1.34106	1.76235	1.5624	1.89518	1.07328	1.91538	1.5027	1.57893	1.1649	2.4206	1.57232	0.853078	1.09738	1.02395	0.407394	6.97784	0.853652	1.71047	0.739963	2.10162	0.857884	1.05093	1.17985	0.834892	1.33969	1.49151	1.37034	1.10445	0.900329	1.42578	2.15073	1.07	2.0049	1.48349	0.954894	1.41887	1.01232	2.0889	1.49252	1.06974	2.41472	2.88574	2.95619	1.16811	1.2901	1.19084	0.881039	0.97544	1.00823
29	1.31409	1.72158	1.54098	1.83194	1.04353	1.82761	1.5189	1.5839	1.1611	2.37112	1.56964	0.85577	1.10002	1.0262	0.401498	7.02245	0.856438	1.72525	0.744837	2.09591	0.869399	1.06299	1.17816	0.83207	1.36515	1.49647	1.37818	1.11139	0.896487	1.42471	2.12414	1.06874	1.97713	1.46905	0.966443	1.43415	1.00785	2.0553	1.48337	1.04593	2.38579	2.83532	2.9184	1.14764	1.27285	1.1619	0.884236	0.979379	1.04483
29.1667	1.32809	1.72159	1.56384	1.835	1.02639	1.77344	1.5311	1.58176	1.16093	2.37059	1.56694	0.847747	1.107	1.03134	0.396124	6.97504	0.863475	1.80367	0.749188	2.17925	0.867624	1.05295	1.17201	0.829052	1.34261	1.4847	1.3817	1.09658	0.901807	1.43943	2.1204	1.07081	1.97077	1.48598	0.977396	1.44352	0.988479	2.05922	1.52511	1.01443	2.3829	2.8138	3.00369	1.15538	1.28333	1.12761	0.878439	0.977475	1.1107
29.3333	1.34662	1.75972	1.55895	1.84381	1.06936	1.84777	1.52198	1.54455	1.14478	2.38145	1.57292	0.860305	1.12874	1.01699	0.387455	6.94852	0.855174	1.78323	0.752483	2.07475	0.865624	1.05956	1.19031	0.833338	1.35655	1.50832	1.37815	1.10592	0.905412	1.44275	2.10604	1.07952	1.97702	1.52593	0.97299	1.47337	0.924842	2.05087	1.49731	1.03099	2.33857	2.79906	3.0199	1.13681	1.27323	1.14093	0.877028	0.976328	1.11308
29.5	1.339	1.74243	1.58612	1.83351	1.06638	1.94248	1.54663	1.56437	1.16167	2.35149	1.56838	0.860293	1.13396	1.03436	0.378674	6.9118	0.860599	1.79087	0.75633	2.13442	0.868664	1.05182	1.18956	0.840947	1.33308	1.49785	1.38006	1.09166	0.910237	1.42608	2.06752	1.06461	1.97269	1.5075	0.969718	1.47506	0.886225	2.01157	1.49848	1.0468	2.33494	2.81521	3.05506	1.13777	1.29026	1.15809	0.874147	0.9723	1.21301
29.6667	1.3419	1.75432	1.55771	1.83448	1.05054	1.9155	1.53837	1.52975	1.14736	2.32803
29.8333	1.37431	1.77102	1.5684	1.88709	1.08222	1.90364
30	1.36609	1.74707	1.52668	1.87797	1.07276	1.87063
[truncated: 239 more columns]

## Sheet: TRPV1
																																		Average of control (1st 2 min)
	02-16-16slp2_V1-YFP	0	0	0	02-16-16slp3_V1-YFP	0	0	02-16-16slp4_V1-YFP	0	04-05-16slp2	03-30-16slp3	0	0	04-05-16slp2	0	0	04-13-16slp1	0	04-13-16slp2	04-13-16slp3	0	0	04-19-16slp1	0	0	0	04-19-16slp2	0	0	0	0	0		02-16-16slp2_V1-YFP	0	0	0	02-16-16slp3_V1-YFP	0	0	02-16-16slp4_V1-YFP	0	04-05-16slp2	03-30-16slp3	0	0	04-05-16slp2	0	0
	bgsub	0	0	0	bgsub	0	0	bgsub	0	bgsub	bgsub	0	0	bgsub	0	0	bgsub	0	bgsub	bgsub	0	0	bgsub	0	0	0	bgsub	0	0	0	0	0		bgsub	0	0	0	bgsub	0	0	bgsub	0	bgsub	bgsub	0	0	bgsub	0	0
min	c1	c3	c5	c6	c2	c3	c4	c7	c8	cell2	cell1	cell2	cell3	cell1	cell2	cell3	cell 6	cell 7	cell 5	cell 3	cell 4	cell 16	cell 1	cell 5	cell 6	cell 7	cell 2	cell 3	cell 4	cell 5_area1	cell 6	cell 9_area2		c1	c3	c5	c6	c2	c3	c4	c7	c8	cell2	cell1	cell2	cell3	cell1	cell2	cell3
0	0.740869	0.793869	0.847784	0.776904	0.983086	0.855643	0.801666	0.662174	0.622539	0.865332	1.025	1.17279	0.985772	0.952279	0.838816	0.923558	0.943799	0.928888	1.10942	0.991519	1.02025	0.84219	0.898384	0.90596	0.8794	0.690726	0.940005	0.951483	0.802133	1.07417	0.750967	1.16571		0.801226	0.839932	0.934542	0.882196	0.999613	0.90206	0.825488	0.751856	0.72548	0.883113	0.977368	1.03897	0.907136	0.993514	0.848372	0.990235
0.166667	0.765341	0.81595	0.899092	0.822505	1.00798	0.878927	0.813582	0.739996	0.677299	0.840423	0.965429	1.03778	0.906897	0.997205	0.870359	0.97755	0.974093	0.943983	1.06469	0.967362	0.994959	0.820978	0.847666	0.905907	0.838223	0.76229	0.975876	0.938079	0.90233	1.15753	0.757312	1.24508
0.333333	0.799768	0.832377	0.909349	0.848175	1.01961	0.88153	0.792077	0.738396	0.704255	0.881813	0.983993	1.0782	0.934168	0.999946	0.891885	0.968465	1.01894	0.966703	1.07762	0.977438	1.00298	0.823384	0.843814	0.915092	0.847005	0.84949	0.986675	1.01654	0.921439	1.19414	0.726762	1.40559
0.5	0.797853	0.833798	0.932123	0.830176	1.02574	0.889011	0.802598	0.756905	0.693653	0.908359	0.989784	1.10595	0.92715	0.991341	0.844768	0.992401	0.99586	0.975879	1.06381	1.00395	0.994202	0.824358	0.877632	0.91518	0.801458	0.806737	1.02437	1.02729	0.9294	1.18231	0.72462	1.24293
0.666667	0.801796	0.830165	0.91478	0.907667	1.02682	0.895692	0.825953	0.729025	0.72641	0.852996	0.978955	1.01261	0.91456	1.00389	0.850238	0.988237	1.00477	0.955463	1.07554	0.984043	0.983122	0.816889	0.871471	0.92328	0.849113	0.809952	1.04409	1.0152	0.893629	1.12397	0.735709	1.36848
0.833333	0.80584	0.841368	0.968718	0.873032	1.00922	0.900829	0.823836	0.750635	0.742151	0.873115	0.97174	1.07917	0.912193	1.00198	0.826288	1.00303	1.0065	0.979081	1.05148	0.97248	0.99044	0.828703	0.841879	0.919544	0.829277	0.798239	1.01504	1.03782	0.948951	1.14815	0.723287	1.34212
1	0.800967	0.86137	0.963473	0.91232	0.992832	0.916985	0.824583	0.76548	0.738768	0.897873	0.965748	1.01067	0.887128	1.00199	0.831223	0.992461	1.0224	0.984	1.03712	0.999137	1.02963	0.821008	0.897664	0.952604	0.853022	0.80054	1.00507	1.0598	0.951952	1.18629	0.779413	1.45536
1.16667	0.811561	0.854943	0.967291	0.87204	0.995146	0.96234	0.82368	0.775746	0.730967	0.903595	0.968727	1.02628	0.88023	0.993719	0.823276	0.993471	1.0138	0.9678	1.06545	0.978332	1.03623	0.835551	0.937078	0.923883	0.836516	0.802259	1.04823	1.05615	0.976885	1.1976	0.733731	1.46041
1.33333	0.829212	0.851677	0.967554	0.863218	0.996186	0.954561	0.831206	0.763507	0.747387	0.920079	0.980605	1.00484	0.893648	0.9975	0.837876	0.979766	1.01616	0.983135	1.07013	0.990754	1.0212	0.824167	0.898047	0.902357	0.851995	0.792867	1.04554	1.0598	0.934692	1.21276	0.750681	1.39781
1.5	0.827534	0.847052	0.953117	0.943006	0.984687	0.931821	0.852266	0.764643	0.759475	0.897153	0.966301	0.972963	0.87248	0.988954	0.808068	0.999333	1.01127	0.967544	1.06134	0.983764	1.02273	0.839014	0.944554	0.923276	0.842174	0.819669	1.03445	1.08218	0.977685	1.18271	0.734905	1.26984
1.66667	0.81071	0.847162	0.941808	0.960744	0.970223	0.862162	0.851211	0.781929	0.776896	0.871472	0.970173	1.00566	0.889394	1.00346	0.843231	1.0339	1.02515	0.957899	1.05083	0.955667	1.00141	0.84973	0.91439	0.938572	0.847361	0.840476	1.00932	1.09141	0.937256	1.18	0.796094	1.19485
1.83333	0.823262	0.869458	0.949414	0.976567	0.983829	0.895225	0.863204	0.793836	0.785965	0.885146	0.961958	0.960729	0.882008	0.989906	0.914431	1.03065	1.03081	0.962906	1.03929	0.986681	1.02543	0.871583	0.933071	0.941516	0.853235	0.809455	1.00325	1.04502	0.903461	1.22299	0.814507	1.20028
2	0.844956	0.881378	0.965965	1.01122	0.986744	0.902185	0.856888	0.7709	0.778274	0.877115	0.968989	1.07134	0.886276	0.990037	0.880742	1.03708	1.03857	0.969276	1.03849	0.988425	1.02668	0.868631	0.958833	0.932203	0.871369	0.81486	1.01642	1.05194	0.928879	1.26696	0.849387	1.21343
2.16667	0.8141	0.88093	0.974819	0.942333	1.01113	0.909112	0.865346	0.776993	0.752696	0.903816	0.97155	1.03124	0.893047	0.993541	0.943794	1.03586	1.01779	0.984973	1.0244	0.978828	1.02214	0.862785	0.916198	0.913621	0.8646	0.85024	1.02295	1.02726	0.961046	1.27649	0.836647	1.2763
2.33333	0.840455	0.897055	0.976266	0.888351	0.997431	0.898819	0.846623	0.79886	0.828977	0.852408	0.945273	1.00944	0.852745	0.998283	0.939577	1.06975	1.02084	1.00097	1.02133	0.990892	0.999844	0.862975	0.936144	0.932307	0.881782	0.895355	1.02864	1.00914	0.970858	1.26228	0.852822	1.3098
2.5	0.847523	0.887058	0.969232	0.910918	1.00396	0.954635	0.882602	0.754609	0.818994	0.872225	0.964	1.03038	0.880644	1.00839	0.944959	1.09524	1.03516	1.01098	1.03552	0.983776	1.01623	0.874685	0.967564	0.926792	0.896593	0.915087	1.03752	1.0631	0.994161	1.28819	0.868413	1.39558
2.66667	0.839694	0.864409	0.930472	0.841295	1.00169	0.936352	0.833779	0.724969	0.821454	0.857499	0.988734	1.06049	0.897521	1.01313	0.989753	1.11122	1.05696	1.00942	1.02446	0.98754	1.03191	0.868151	0.971539	0.946416	0.854979	0.889496	1.07238	1.04953	0.960435	1.30603	0.865196	1.38461
2.83333	0.843163	0.903002	0.961938	0.922781	1.00086	0.947691	0.860701	0.72886	0.841829	0.875396	0.988394	1.10278	0.920316	0.996901	0.944688	1.12419	1.05776	0.993497	1.01588	0.990902	1.01787	0.890032	0.964376	0.989583	0.866214	0.882501	1.11065	1.02319	0.945038	1.30266	0.890003	1.38884
3	0.846878	0.906488	0.978879	0.959882	0.994879	0.957859	0.869727	0.755048	0.856837	0.849301	0.97425	1.04823	0.87717	0.994273	0.986387	1.15409	1.04159	1.02205	1.01624	0.991941	1.01514	0.893528	0.95485	0.953656	0.870771	0.889641	1.10106	1.05454	0.979743	1.28071	0.882404	1.28786
3.16667	0.853561	0.934119	0.984388	0.942453	1.00579	0.965262	0.871243	0.748635	0.868264	0.865116	1.00192	1.08974	0.917474	1.00119	0.917443	1.17185	1.05043	1.02196	0.991309	0.986935	1.01634	0.88138	0.986826	0.941508	0.853502	0.890719	1.11772	1.04028	1.05429	1.31027	0.916367	1.25207
3.33333	0.881163	0.911214	0.979568	0.871897	1.01964	0.968549	0.860286	0.742259	0.85643	0.864362	0.98091	1.04285	0.89454	0.996751	0.949672	1.19691	1.05213	1.02254	1.00353	0.993901	0.990289	0.897093	0.974192	0.922992	0.843289	0.941813	1.08917	1.04563	1.05708	1.29365	0.887225	1.3162
3.5	0.898475	0.921122	0.963992	0.841615	1.0174	0.952559	0.860262	0.738723	0.911292	0.840083	0.99239	1.06583	0.914373	0.981959	0.968935	1.17828	1.0417	1.00479	1.00546	0.988321	0.974772	0.885229	0.989507	0.89548	0.884411	0.922802	1.05492	0.982271	1.10632	1.28275	0.885434	1.24457
3.66667	0.873093	0.919823	0.984569	0.894257	1.02736	0.957535	0.850349	0.763966	0.904271	0.833612	0.997923	1.04858	0.935142	0.969731	0.971757	1.18305	1.06022	1.01487	1.02174	0.992707	0.988171	0.900244	1.00895	0.904431	0.875611	0.947767	1.04198	1.05081	1.05354	1.27403	0.932457	1.40963
3.83333	0.859388	0.920373	0.963628	1.01305	1.01798	0.955118	0.871293	0.80258	0.905608	0.888031	0.997153	0.989242	0.920828	0.972132	0.889693	1.18003	1.05856	1.01684	1.01932	1.00184	0.983437	0.911062	0.979379	0.918652	0.894519	0.862335	1.00076	1.0498	1.03211	1.32766	0.904406	1.38096
4	0.874747	0.927461	0.97647	0.943583	1.03556	0.97417	0.870184	0.807961	0.934371	0.869886	0.999061	1.02	0.914642	0.989033	0.957315	1.19018	1.05212	1.0189	0.990594	0.999942	0.994941	0.903411	1.02229	0.934388	0.906616	0.945874	1.01538	1.06297	0.986912	1.28696	0.92199	1.37382
4.16667	0.885686	0.935273	0.992888	0.990837	1.02721	0.999081	0.861096	0.791752	0.925126	0.876976	1.00039	1.01557	0.949579	0.994463	0.948413	1.15549	1.03845	0.977874	0.998183	1.00821	0.989144	0.936295	1.05102	0.967877	0.920221	0.971227	1.02842	1.03149	0.973394	1.27096	0.914487	1.31103
4.33333	0.904921	0.934826	1.00644	0.966313	1.01657	1.00777	0.880818	0.820485	0.910853	0.943337	0.998927	1.02284	0.977997	1.00078	0.976409	1.15696	1.02143	0.964825	1.01313	0.998881	0.983393	0.935769	1.04827	0.959478	0.929349	0.951822	1.0353	1.02938	0.965442	1.25237	0.899139	1.16505
4.5	0.896531	0.928554	0.980042	0.88029	1.01296	0.970063	0.876006	0.873287	0.863816	0.878124	0.994688	1.02928	0.958601	0.995876	0.955827	1.13803	1.05577	0.9785	0.987547	0.98831	0.959552	0.93719	1.05941	0.935757	0.978567	0.987769	0.980639	1.06245	0.983914	1.24675	0.948343	1.26647
4.66667	0.897735	0.930212	0.987014	0.994185	1.01416	0.960872	0.87981	0.848027	0.865634	0.908583	0.961616	0.967882	0.921045	0.998791	1.02093	1.13106	1.03368	0.975188	0.979424	0.982376	0.987267	0.951233	1.0097	0.898679	0.980022	0.912658	0.950411	1.00801	0.896629	1.18785	0.94664	1.28011
4.83333	0.911149	0.939303	0.990433	0.965056	1.01701	0.977728	0.872647	0.856193	0.849776	0.942223	0.972515	1.00401	0.94355	0.991378	0.9769	1.11675	1.07165	0.939399	0.973768	1.00191	1.01362	0.96998	1.01336	0.911338	0.975237	0.96037	0.921052	1.00176	0.926339	1.21423	0.901379	1.26704
5	0.90793	0.94146	0.990309	0.985896	0.996432	0.971698	0.870817	0.842046	0.858976	0.973628	0.974739	0.986726	0.958271	0.99008	1.02449	1.09964	1.05981	0.961141	0.971929	0.995599	1.02852	0.971818	1.00608	0.933304	0.968613	0.966465	0.96621	0.966035	0.9482	1.16619	0.888094	1.23563
5.16667	0.890347	0.944454	0.957332	0.962039	1.00903	0.957887	0.903106	0.824198	0.849782	0.919094	0.983164	1.00406	0.973995	0.978346	0.965189	1.07714	1.03664	0.973186	0.976092	1.00015	1.00629	0.96624	1.0127	0.957018	0.979093	0.951525	0.961674	0.954464	0.956566	1.20039	0.959374	1.15827
5.33333	0.906495	0.951156	0.984583	0.956181	1.00882	0.961175	0.8934	0.820052	0.851908	0.969278	0.977724	0.931181	0.937126	0.989891	0.95705	1.07914	1.0588	0.965565	0.971852	0.994921	0.993412	0.990528	1.00461	0.947723	0.959696	0.999957	0.984908	0.988546	0.98464	1.19431	0.982424	1.15062
5.5	0.902596	0.944327	0.960489	0.913103	1.00818	0.9671	0.913206	0.835782	0.901936	0.964273	0.958228	0.946723	0.920669	0.99037	0.946533	1.06738	1.04178	0.987748	0.971303	0.99382	0.99299	0.986678	0.974071	0.951494	0.970645	0.964456	0.952904	0.990101	0.977896	1.17096	0.979508	1.13369
5.66667	0.867707	0.93828	0.962766	0.915696	1.00383	0.957795	0.908511	0.851428	0.910657	0.97483	0.951259	0.988563	0.929949	0.985345	0.933327	1.07066	1.03062	0.989292	0.969248	1.00401	0.959605	0.982767	1.01661	0.948069	0.958028	0.961668	0.984177	0.955171	0.985588	1.17294	0.957748	1.22128
5.83333	0.8971	0.934356	0.941998	0.97336	1.01278	0.963029	0.933142	0.855064	0.910375	0.960157	0.956597	0.978773	0.937767	0.989506	0.984496	1.06047	1.04945	0.964673	0.956744	0.982842	0.955514	0.977694	0.991374	0.941113	0.991628	0.962461	0.980281	0.93275	0.939616	1.12052	0.959197	1.19652
6	0.91347	0.930666	0.942815	0.928675	1.00078	0.956023	0.889149	0.818207	0.912337	1.02104	0.935822	0.990271	0.908578	0.992178	0.962455	1.04929	1.06887	0.988919	0.961014	1.00454	0.987707	0.972057	1.00555	0.95916	0.960833	0.959453	1.0242	0.866065	1.00178	1.14476	0.930616	1.14439
6.16667	0.903069	0.924651	0.921231	0.913337	1.0209	0.981215	0.943128	0.854574	0.901527	1.05488	0.951732	1.04798	0.934757	0.99531	0.92157	1.03828	1.06669	1.01426	0.972019	1.02322	0.991105	0.981305	0.98179	0.952532	1.01512	0.962766	1.06268	0.966709	1.06185	1.12222	0.992513	1.23858
6.33333	0.9195	0.926668	0.940789	0.940669	0.997646	0.999873	0.929564	0.872481	0.918313	0.974551	0.97268	1.00167	0.976118	0.987228	0.852823	1.03068	1.07583	1.00185	0.974649	1.00136	0.961193	0.971271	0.966777	0.968156	0.999604	0.989657	1.04866	0.937905	0.982882	1.09872	0.996143	1.19031
6.5	0.943706	0.938792	0.962985	1.01083	1.01305	0.980314	0.935794	0.897118	0.960211	0.982616	0.931411	0.998253	0.911331	1.00762	0.811923	1.02543	1.05422	1.01536	0.976396	1.00253	0.9713	0.97233	0.970974	0.971103	1.00956	1.0116	1.01644	0.891759	0.991445	1.13184	0.987415	1.35321
6.66667	0.937778	0.932449	0.948144	1.00979	1.01396	0.991261	0.942551	0.921171	0.944256	1.01757	0.958483	1.00518	0.956336	1.01362	0.954718	1.02316	1.03545	1.01209	0.983169	1.02221	0.979902	0.966925	0.980014	0.94313	0.989999	1.01486	0.99977	0.906527	1.01656	1.09013	1.01827	1.29338
6.83333	0.954629	0.936371	0.94539	1.02489	1.00994	0.990136	0.932097	0.893584	1.00746	0.954259	0.97422	1.02606	0.988143	0.995878	0.927143	1.01626	1.03915	1.0492	0.968422	1.01871	0.974138	0.979594	1.01074	0.940759	1.01645	1.03556	0.996123	0.887366	0.938582	1.11997	0.981577	1.28476
7	0.950866	0.95013	0.975806	1.02657	1.01796	1.01097	0.967618	0.888809	1.00812	0.946445	0.975373	0.982618	1.00309	1.01397	0.964429	1.01878	1.02596	1.01877	0.965891	1.01076	0.973852	0.980487	0.979441	0.965117	1.06163	1.00893	0.987331	0.923686	0.988368	1.10781	1.04534	1.1762
7.16667	0.968356	0.952793	0.986027	1.07464	1.00593	0.973351	0.96393	0.898578	0.97082	0.983524	0.949752	0.991014	0.956306	1.00972	0.968653	1.00647	1.02606	1.04257	0.99087	1.02205	0.993888	1.00589	0.97594	0.953702	1.05445	1.019	0.960887	0.895219	0.975436	1.11646	1.00487	1.05253
7.33333	0.967318	0.962003	0.958793	1.03648	1.00179	0.989415	0.983295	0.935567	1.03695	0.979692	0.936412	0.925364	0.956683	1.02274	1.06541	1.01552	0.990964	1.00925	0.989194	1.01273	0.991748	0.999783	0.982161	0.950271	1.03701	1.03588	0.984964	0.934338	0.951045	1.0849	1.00574	1.10885
7.5	0.980634	0.965435	0.973338	1.1513	1.02045	1.00796	1.04175	0.932097	1.01192	1.02582	0.960495	1.05526	0.992138	1.04574	1.02791	1.02908	0.998595	1.01943	0.992688	0.986243	0.97035	1.00647	0.997058	0.9349	1.03784	0.985244	1.0097	0.993249	0.963615	1.06937	1.05249	1.13268
7.66667	0.958131	0.962135	0.968199	1.09205	1.02289	1.0285	1.0629	0.97777	1.04735	0.999564	0.94242	0.974007	0.972065	1.01335	1.06471	1.00918	1.01012	1.01698	0.995729	0.981657	0.981904	0.983571	1.01167	0.926885	1.0053	1.00557	1.01391	0.996003	0.990685	1.03234	1.06711	1.08833
7.83333	0.948762	0.974133	0.991438	1.06134	1.02876	1.02119	1.03778	1.04985	1.0466	0.970119	0.960648	0.978058	0.998826	1.00854	1.00663	0.997479	1.00629	0.997005	1.00079	0.981338	0.990359	1.01266	1.04941	0.970636	1.00586	1.00394	1.00531	1.04473	0.966702	1.0296	1.04171	1.06548
8	0.958067	0.968455	0.984349	1.10918	1.00676	0.99668	1.03434	0.97132	1.01998	1.00248	0.973968	1.00894	1.01872	1.00139	0.954441	0.995745	1.00503	0.980895	0.993917	0.988632	0.998331	0.995566	1.01265	0.985029	1.0179	1.02041	1.00646	1.03304	0.956872	1.00986	0.990112	1.0863
8.16667	0.988259	0.976646	0.995647	1.12722	1.00689	1.02323	1.03585	1.01096	0.994548	0.946065	0.964509	0.991157	1.03296	1.01757	0.975657	0.999621	1.01093	1.02621	0.977149	0.994122	1.00526	0.995804	1.00708	0.959768	1.02348	0.98808	1.02711	1.00025	0.938366	1.01412	1.02734	1.01676
8.33333	0.970029	0.973772	0.996294	1.10206	0.999771	1.00688	0.993111	1.009	1.00702	0.917817	0.95827	0.986283	0.993987	0.990526	0.926224	0.995498	1.02375	0.994362	1.00442	0.978784	0.984698	0.999612	0.99559	0.962905	0.99242	0.958185	0.986734	0.96253	0.946134	1.00256	0.97181	0.923833
8.5	0.981025	0.98121	0.996363	1.06091	1.0189	1.03059	1.02874	1.04673	0.99715	0.938695	0.989336	1.03345	1.06274	0.986678	0.936233	0.999737	1.00711	1.00349	1.00839	1.00135	1.00397	1.01018	0.968929	0.994524	1.00614	0.990978	0.967907	0.999595	0.991337	0.954683	0.979108	0.95519
8.66667	0.972627	0.984073	1.01114	1.06284	1.01329	0.992919	1.03913	1.08202	1.01044	0.987577	0.985078	1.00021	0.945426	0.998701	0.936265	0.998361	1.00168	0.999986	1.01394	0.993346	0.998952	0.995356	1.00119	0.992471	0.983574	1.02258	0.979543	0.970151	1.0131	0.972088	0.976315	0.92524
8.83333	1.00323	0.989296	0.999469	1.00767	1.00586	1.00253	1.03819	1.0495	1.01674	1.00309	1.04092	1.01698	0.955003	0.986373	1.03119	1.00971	1.00795	0.984942	1.00957	1.03305	1.00968	1.00064	1.00024	1.01902	1.01061	1.01354	0.984038	0.945377	1.06533	0.983363	0.961753	1.03215
9	1.00323	0.989296	0.999469	1.00767	1.00375	0.999121	1.03648	0.962687	1.00147	0.978394	1.0885	1.11168	0.95415	0.989008	1.10455	0.981882	1.00273	0.982999	1.01381	1.01962	1.00878	1.01265	0.987977	1.02709	0.969283	1.03287	1.02798	1.00612	1.01754	1.00429	0.979758	1.03555
9.16667	1.0027	0.990543	0.9991	1.05467	0.983434	0.983044	1.00392	1.01738	1.00384	0.993463	1.04354	0.978644	0.973989	0.988949	1.06537	0.98873	0.994557	1.00828	1.01305	1.0117	0.989141	0.99268	0.976899	1.07013	0.989503	1.02595	0.996561	1.00211	1.00313	1.00628	0.987978	0.920877
9.33333	1.01061	1.00809	0.988466	0.999584	1.00041	1.00945	0.980795	0.924082	0.977297	1.00727	1.04711	0.947659	1.03907	1.00891	1.00701	1.00497	0.972774	1.00952	1.00951	1.02525	1.01808	0.991744	1.05291	1.08028	1.00227	1.03567	0.99125	1.03315	1.02545	0.972339	1.02572	0.996978
9.5	0.981746	1.00086	0.987445	1.01358	0.982646	0.990852	0.984255	0.999384	1.02668	1.00073	1.03889	0.90742	1.0542	1.01685	1.02643	1.00812	1.0045	1.02072	1.02992	1.03638	0.996402	0.993895	1.03721	1.05799	0.995042	1.02828	1.01753	1.07715	1.01558	0.98336	0.989661	0.95506
9.66667	1.00641	1.00984	1.00639	1.00847	0.993944	0.987516	0.981707	0.988891	1.00425	0.986042	1.05299	0.93043	1.04196	1.05569	1.08764	1.01777	0.986186	1.00884	1.03101	1.07305	1.00654	1.00064	1.01445	1.06967	1.00667	1.05838	1.04971	1.05682	0.971313	0.94428	0.963065	1.06507
9.83333	0.992472	1.01631	0.973046	1.00068	0.992584	0.989103	0.983125	0.962439	1.00883	1.01993	1.05082	1.0209	1.028	1.12179	1.17697	1.07801	0.994468	1.06268	1.03951	1.06426	1.00139	1.00745	1.09428	1.07203	1.04392	1.05161	1.08694	1.09914	1.06227	0.956601	0.990998	1.03179
10	1.0091	1.02397	1.01368	0.885457	1.00046	1.00785	0.977976	0.928495	0.959262	1.05321	1.0612	0.961766	1.02724	1.13258	1.16734	1.08079	1.00109	1.04363	1.03622	1.08011	0.990936	1.00848	1.06577	1.0503	1.04299	1.07215	1.16082	1.10172	1.0306	0.939334	0.99919	0.973555
10.1667	1.03684	1.00652	1.02543	0.898474	1.00473	1.00704	0.94568	1.03839	0.994045	1.0316	1.07307	0.963566	1.06401	1.08574	1.11653	1.03194	0.975653	1.0341	1.05737	1.09262	0.991306	0.988681	1.08227	1.05018	1.05654	1.06023	1.16377	1.05587	1.02474	0.917809	0.964011	0.954486
10.3333	1.02426	0.965624	0.99657	0.933371	1.00572	1.00266	0.944628	1.04866	0.992705	1.00778	1.05845	0.989285	1.04127	1.04751	1.11445	1.02455	0.998944	1.04449	1.06173	1.06554	0.95154	0.991122	1.07935	1.05841	1.04892	1.03108	1.15813	1.08209	1.01854	0.932168	0.967321	0.872983
10.5	1.04657	0.961792	1.02423	1.07681	1.0337	1.02598	0.933449	1.07017	1.04692	1.00447	1.0418	0.974807	1.0531	1.02407	1.2054	1.00999	0.992692	1.05656	1.06654	1.05869	0.953284	0.992486	1.09195	1.04313	1.03126	1.04319	1.15789	0.994774	1.00722	0.915841	0.928854	0.895514
10.6667	1.04556	1.02843	1.04339	0.992308	1.0388	0.968628	0.921353	1.11226	1.12106	1.05688	1.05423	0.946066	1.07064	1.03078	1.24659	1.00429	0.984385	1.03437	1.0715	1.04335	0.950015	0.99401	1.08032	1.04471	1.06339	1.01199	1.15521	1.03218	0.999949	0.924602	0.936663	0.794539
10.8333	1.11492	1.01312	1.09758	1.04126	1.05253	1.00352	0.943209	1.23829	1.16132	1.01634	1.08142	0.952519	1.10604	1.02284	1.31444	1.00548	0.985723	1.0346	1.0589	1.06081	0.954804	0.999586	1.0671	1.02638	1.0738	1.07513	1.15128	1.15335	1.04537	0.935153	0.917388	0.957503
11	1.0969	1.04522	1.14798	1.13201	1.05741	0.997339	0.917265	1.14877	1.15029	0.9957	1.09259	0.944079	1.0997	1.0108	1.4006	0.985289	1.00134	1.03273	1.04203	1.07237	0.936656	1.01145	1.08196	1.03036	1.02395	1.00823	1.19649	1.25026	1.05179	0.973171	0.970266	1.04079
11.1667	1.07735	1.04279	1.13426	0.947097	1.06514	1.0037	0.899907	1.18025	1.09343	1.00826	1.08857	0.944715	1.09907	1.03654	1.45486	0.996907	0.984888	1.03691	1.04915	1.09759	0.947452	1.01408	1.03364	0.966822	1.03833	1.04815	1.23204	1.23595	1.00738	0.952353	1.0293	1.21047
11.3333	1.09983	1.0571	1.14945	0.930581	1.04005	0.979654	0.968972	1.15715	1.16904	0.987304	1.09182	0.900346	1.09657	1.02907	1.33327	0.987347	0.988681	1.04173	1.06316	1.11861	0.916466	1.02282	1.10086	1.04086	1.07013	1.08041	1.24853	1.23152	1.01505	1.0865	1.02983	1.06767
11.5	1.14311	1.07944	1.13064	0.934166	1.05459	0.993927	0.974554	1.04836	1.08328	0.971515	1.08522	0.933717	1.0835	1.03119	1.28242	0.985789	1.00693	1.02872	1.03799	1.14908	0.918456	1.02188	1.132	1.07246	1.10003	1.08647	1.24274	1.22493	1.00716	1.03593	1.09199	1.01687
11.6667	1.1231	1.07429	1.10091	0.959559	1.05698	0.981466	0.960029	1.06132	1.11716	0.976454	1.08878	0.885446	1.07738	1.04078	1.23408	0.984267	1.01936	1.06955	1.044	1.12641	0.903796	1.01824	1.15427	1.09559	1.09866	1.04843	1.21233	1.27574	0.967283	1.04378	1.07299	0.977366
11.8333	1.0837	1.08788	1.10124	1.0295	1.06281	1.01309	0.971178	1.04911	1.12825	0.950444	1.11093	0.90106	1.10997	1.0546	1.26968	0.979191	1.00078	1.04941	1.05565	1.15204	0.928518	1.01061	1.11667	1.09916	1.10319	0.994399	1.23591	1.22968	0.986554	1.13452	1.06947	0.823235
12	1.12847	1.09513	1.0827	0.983065	1.06038	1.02171	0.98112	1.05111	1.09547	0.962831	1.11042	0.897123	1.08033	1.04778	1.13605	0.972659	0.999268	1.03968	1.0514	1.15241	0.927705	1.02632	1.09607	1.1403	1.1024	1.04381	1.23825	1.29428	0.948361	1.1777	1.07032	0.750841
12.1667	1.11115	1.1071	1.08095	1.01102	1.08236	1.02109	0.974162	1.08154	1.05634	0.984611	1.12523	0.901025	1.10206	1.05771	1.12142	0.971235	1.02033	1.04628	1.04876	1.11324	0.912198	1.01341	1.05828	1.14566	1.10707	1.10468	1.279	1.29966	0.934815	1.22341	1.03381	0.714165
12.3333	1.12309	1.12325	1.09276	0.991583	1.09581	1.03983	0.985755	1.09421	1.05989	1.01562	1.10503	0.856905	1.07242	1.07408	1.15179	0.988514	1.00655	1.03213	1.07822	1.13602	0.945128	1.00716	1.01615	1.12533	1.07222	1.11352	1.31781	1.32914	0.968704	1.18521	1.10875	0.806888
12.5	1.11792	1.13769	1.08977	0.985595	1.1134	1.10808	0.981768	1.06812	1.06255	0.949621	1.12278	0.907113	1.08709	1.09227	1.11562	0.984795	1.00597	1.01072	1.06025	1.13994	0.954224	1.0095	1.06875	1.13092	1.10949	1.10881	1.34125	1.32283	1.00409	1.26134	1.13913	0.784335
12.6667	1.15549	1.14216	1.10658	0.939076	1.12916	1.12998	1.00194	1.10304	1.04965	0.99288	1.10557	0.868982	1.07031	1.08952	1.09355	0.992254	0.992935	1.02943	1.07485	1.15678	0.978968	1.01845	1.05133	1.12756	1.13863	1.11363	1.34111	1.29505	1.00298	1.28757	1.15498	0.82205
12.8333	1.10595	1.17153	1.10782	0.959239	1.15035	1.15465	1.02846	1.12229	1.055	0.968353	1.12417	0.875213	1.04849	1.09161	1.05547	0.99164	0.997758	1.0304	1.06684	1.12852	0.947435	0.987234	1.04686	1.13397	1.1388	1.16903	1.30453	1.39082	1.03612	1.24704	1.17942	1.01507
13	1.0913	1.1718	1.12067	0.924972	1.15048	1.1577	1.02037	1.17864	1.11664	0.950702	1.14228	0.903247	1.0676	1.09305	1.0735	0.972671	1.00478	1.03409	1.04596	1.12543	0.958161	1.0149	1.02109	1.10244	1.11415	1.11597	1.25926	1.32565	1.10025	1.2761	1.21169	1.15233
13.1667	1.10107	1.16726	1.10464	1.00052	1.16025	1.14051	1.02245	1.15666	1.08711	0.963735	1.1464	0.894036	1.09152	1.10282	1.07001	1.00012	1.01477	1.03565	1.05623	1.14786	0.933922	1.02722	1.07457	1.13442	1.13918	1.07973	1.22758	1.28171	1.07746	1.22905	1.22489	1.25618
13.3333	1.08137	1.15741	1.11384	0.976329	1.16787	1.11354	1.03	1.24192	1.0939	0.879782	1.1381	0.916317	1.05819	1.12795	1.16114	1.02832	1.00027	1.01049	1.05752	1.17107	0.946077	1.04336	1.02974	1.13073	1.13724	1.10246	1.24154	1.29039	1.06957	1.26111	1.21031	1.07285
13.5	1.09362	1.16493	1.13659	1.07136	1.17078	1.11937	1.00068	1.23601	1.03806	0.878867	1.14285	0.921898	1.06066	1.09718	1.20451	1.00228	0.992885	1.02921	1.0735	1.1502	0.933248	1.04202	1.05216	1.15983	1.14848	1.14978	1.26796	1.30367	1.09687	1.24874	1.19456	1.07629
13.6667	1.06936	1.17518	1.14975	1.00651	1.20407	1.13237	1.03474	1.28221	1.01571	0.837589	1.14974	0.885525	1.06657	1.09762	1.30551	1.00351	1.01035	1.03051	1.07178	1.16743	0.944897	1.06464	0.969726	1.17151	1.17189	1.19588	1.25243	1.24686	1.08796	1.28685	1.14932	1.33644
13.8333	1.04776	1.19553	1.17912	1.00148	1.20654	1.12841	1.03809	1.30697	0.967969	0.939249	1.14977	0.876135	1.04127	1.10813	1.40224	1.00931	1.02613	1.01832	1.05154	1.14718	0.928553	1.05366	0.97852	1.21351	1.11118	1.11982	1.29936	1.30062	1.17565	1.24415	1.17788	1.41455
14	1.10182	1.20366	1.20178	1.03008	1.1963	1.13704	1.04475	1.35148	0.991379	0.984898	1.14295	0.897494	1.00474	1.12659	1.48964	1.02195	1.04302	1.0676	1.08526	1.17391	0.953452	1.07257	0.980339	1.20323	1.11806	1.11867	1.3582	1.30053	1.14589	1.28934	1.18927	1.38767
14.1667	1.04453	1.20145	1.19475	0.927598	1.20303	1.15669	1.0479	1.39562	1.0268	0.944611	1.14895	0.922777	1.03895	1.14507	1.49729	1.00906	1.04592	1.07063	1.07399	1.1745	0.926207	1.07383	0.987086	1.21236	1.12907	1.12362	1.37687	1.28769	1.15693	1.29919	1.18475	1.6627
14.3333	1.05872	1.20634	1.20285	0.891383	1.19028	1.1216	1.0326	1.4214	1.0325	0.956452	1.15511	0.901882	1.04255	1.16312	1.51582	1.02628	1.057	1.05005	1.05718	1.15401	0.909467	1.06028	0.974154	1.2423	1.13969	1.1921	1.36486	1.25367	1.10081	1.28006	1.1466	1.54702
14.5	1.05824	1.19584	1.236	0.967492	1.20517	1.10325	1.05078	1.44857	1.12486	0.96825	1.14881	0.91423	1.00437	1.16336	1.57885	1.0019	1.06594	1.03089	1.06138	1.17678	0.915877	1.07672	0.948447	1.25524	1.11587	1.20744	1.37214	1.26136	1.11763	1.29835	1.20084	1.45563
14.6667	1.07717	1.2108	1.23641	0.967929	1.20997	1.12105	1.04523	1.5208	1.154	0.994916	1.13242	0.911322	0.987233	1.1779	1.4938	1.01576	1.06766	1.05541	1.06898	1.19195	0.930733	1.08189	1.02611	1.26332	1.15059	1.26429	1.31897	1.24144	1.11535	1.30804	1.20049	1.55295
14.8333	1.08679	1.20081	1.22986	0.918565	1.21555	1.11454	1.08536	1.59075	1.15834	0.99844	1.13822	0.892478	0.987419	1.16706	1.44677	0.994784	1.0519	1.02972	1.07128	1.17991	0.930357	1.06694	0.963116	1.26654	1.16119	1.19923	1.37235	1.29556	1.17436	1.31264	1.26912	1.55692
15	1.0613	1.2275	1.24016	1.01244	1.19679	1.07077	1.03227	1.57663	1.17816	0.999274	1.1772	0.920162	1.06215	1.18651	1.45948	1.01583	1.06635	1.05475	1.06535	1.17524	0.917632	1.05357	0.990631	1.2675	1.20943	1.22421	1.32832	1.40575	1.15588	1.39145	1.21889	1.4626
15.1667	1.05227	1.22855	1.26184	0.898522	1.20838	1.08371	1.05248	1.63775	1.2077	1.07971	1.15482	0.91686	1.02265	1.19378	1.38972	1.00927	1.07816	1.03945	1.089	1.19698	0.916166	1.06145	1.00418	1.28109	1.20144	1.2943	1.27262	1.31282	1.11735	1.39553	1.21596	1.47466
15.3333	1.0441	1.23248	1.23066	0.93433	1.19537	1.07777	1.05459	1.69623	1.19404	1.09909	1.14988	0.904748	0.99883	1.20044	1.46051	1.01307	1.08116	1.07191	1.05534	1.21371	0.908278	1.07805	0.963732	1.24145	1.18981	1.29417	1.28478	1.19235	1.07661	1.39917	1.23546	1.54143
15.5	1.03485	1.22749	1.22117	0.887919	1.17752	1.05654	1.06842	1.71334	1.25756	1.06582	1.18337	0.918489	1.03662	1.19255	1.31858	1.00632	1.09501	1.05974	1.06646	1.20857	0.868723	1.06739	0.973144	1.28292	1.19173	1.26483	1.26723	1.16509	1.0632	1.31789	1.17381	1.41614
15.6667	1.07425	1.22853	1.21394	0.886829	1.17692	1.07655	1.05591	1.77407	1.24694	1.0604	1.17175	0.891542	1.02558	1.21821	1.46964	1.01682	1.09865	1.08159	1.07418	1.20856	0.887847	1.08351	0.944591	1.26563	1.1638	1.2343	1.25938	1.12221	1.07081	1.31657	1.19468	1.53102
15.8333	1.06638	1.23987	1.22146	0.898468	1.17422	1.00106	1.03767	1.8171	1.24959	1.13435	1.16808	0.922677	1.0103	1.21165	1.49198	0.998636	1.13119	1.06743	1.07327	1.17928	0.886468	1.09005	0.974471	1.23878	1.19363	1.2728	1.2792	1.10528	1.03866	1.31997	1.23413	1.60611
16	1.0769	1.23309	1.22865	0.931642	1.1719	1.04704	1.03621	1.82417	1.28085	1.09837	1.14975	0.902697	0.989604	1.22553	1.64215	1.01216	1.16521	1.10352	1.09423	1.1771	0.883556	1.06401	0.979334	1.24428	1.12772	1.20003	1.3107	1.10884	1.08092	1.32727	1.23416	1.5617
16.1667	1.05755	1.23136	1.25146	0.953872	1.17837	1.01932	1.03481	1.85603	1.27802	1.07086	1.17618	0.893171	1.02191	1.22924	1.56418	1.00718	1.18674	1.14425	1.07148	1.20762	0.896111	1.08645	1.03661	1.23383	1.15345	1.17481	1.3002	1.07685	1.08375	1.30888	1.1675	1.48917
16.3333	1.05259	1.2301	1.28106	0.928699	1.18449	1.06173	1.03259	1.87561	1.2834	1.03845	1.15687	0.877336	1.01276	1.2268	1.56696	1.01595	1.21497	1.17399	1.06039	1.1881	0.910815	1.08045	1.03188	1.24461	1.17345	1.21769	1.30013	1.05562	1.11697	1.27368	1.17846	1.38849
16.5	1.05797	1.21953	1.24647	0.937866	1.18202	1.03801	1.03785	1.99338	1.29721	0.987464	1.15239	0.877679	0.98761	1.21023	1.50384	1.00667	1.23847	1.14237	1.06924	1.18545	0.89832	1.08478	1.041	1.22091	1.16988	1.2832	1.30991	1.00764	1.11317	1.25978	1.20501	1.37127
16.6667	1.05063	1.21042	1.23052	1.00124	1.17824	1.06841	1.04505	1.90954	1.24676	0.984613	1.14991	0.906413	0.988061	1.20793	1.46373	1.01499	1.27219	1.15517	1.09145	1.19177	0.905299	1.08149	1.04836	1.25416	1.14101	1.23526	1.30853	1.02735	1.12657	1.33606	1.22366	1.40371
16.8333	1.04917	1.23279	1.26725	0.90086	1.17104	1.0615	1.01985	1.95683	1.23384	1.01095	1.15484	0.905069	1.00412	1.22352	1.51807	1.01136	1.30501	1.14559	1.11481	1.20919	0.895873	1.07082	1.04795	1.249	1.1794	1.28779	1.26516	1.01455	1.06132	1.27435	1.18479	1.52442
17	1.02615	1.21747	1.28648	0.944739	1.17838	1.08373	1.04078	1.94539	1.20907	1.0065	1.14307	0.929073	0.986974	1.21802	1.54835	1.03149	1.28283	1.14541	1.11374	1.23139	0.881688	1.06025	1.07296	1.22531	1.18963	1.35331	1.28507	1.00448	1.13667	1.29904	1.21403	1.47823
17.1667	0.989204	1.22566	1.25801	0.947463	1.16425	1.07564	1.01761	2.04243	1.20776	0.990075	1.1495	0.942271	0.975713	1.1985	1.57126	1.01926	1.2974	1.11157	1.11282	1.25023	0.921675	1.086	1.07749	1.26268	1.18734	1.32973	1.25969	0.99509	1.0734	1.25372	1.17218	1.49665
17.3333	1.04588	1.22418	1.26467	0.882981	1.16096	1.09	1.01306	2.00751	1.24385	0.955504	1.14998	0.863651	0.988847	1.19444	1.6429	1.00445	1.29675	1.12008	1.13779	1.22085	0.923304	1.0741	1.12201	1.24165	1.19666	1.3165	1.26619	0.966711	1.11999	1.31272	1.18853	1.41658
17.5	1.02373	1.22274	1.28972	0.875738	1.16607	1.07498	1.00419	2.06373	1.32732	0.947186	1.15195	0.920726	1.00466	1.19073	1.73998	1.00219	1.29067	1.11185	1.12242	1.23183	0.921737	1.09009	1.14541	1.27232	1.16353	1.35003	1.25313	1.03167	1.09121	1.28351	1.18099	1.32496
17.6667	1.01161	1.22916	1.25998	0.91585	1.15525	1.07429	1.0117	2.07885	1.31857	0.965828	1.12291	0.899102	0.975633	1.1845	1.68963	1.02569	1.28256	1.0811	1.13556	1.21197	0.914168	1.10314	1.16438	1.26002	1.20799	1.33786	1.29543	1.03549	1.09601	1.28505	1.2032	1.39558
17.8333	1.00161	1.22144	1.29283	0.874759	1.1687	1.12155	1.02442	2.11618	1.34952	1.01141	1.12791	0.882295	0.95494	1.19313	1.70593	1.02555	1.29796	1.11922	1.11973	1.25401	0.916602	1.10818	1.20709	1.25215	1.18495	1.34582	1.30403	1.03087	1.08074	1.30964	1.22381	1.53832
18	1.01634	1.23876	1.27043	0.884352	1.16668	1.0902	0.998235	2.1992	1.39148	0.965862	1.15756	0.899874	1.01813	1.18717	1.67841	1.01547	1.25085	1.10265	1.1172	1.21161	0.937179	1.08722	1.18359	1.24789	1.16563	1.3651	1.24803	1.02977	1.13779	1.28751	1.16449	1.47237
18.1667	1.01429	1.23572	1.31347	1.00699	1.173	1.10817	1.00866	2.24792	1.3519	1.00551	1.14786	0.928322	1.03679	1.1833	1.68508	1.01573	1.25711	1.12298	1.13463	1.23824	0.946088	1.11622	1.20001	1.30986	1.18864	1.31571	1.20615	1.00784	1.09324	1.2779	1.20262	1.5423
18.3333	1.02509	1.22505	1.30972	0.989126	1.16235	1.08484	0.99605	2.18119	1.43033	1.06379	1.13364	0.939834	1.01163	1.19209	1.72092	1.02864	1.25052	1.12204	1.09441	1.24379	0.919592	1.10211	1.24993	1.30467	1.16824	1.31946	1.19727	0.997114	1.1292	1.26091	1.1798	1.35634
18.5	1.0203	1.23605	1.32142	1.00386	1.17385	1.12693	1.00427	2.30943	1.40685	1.07205	1.1303	0.876499	0.99217	1.16542	1.6824	1.02236	1.24878	1.08366	1.10128	1.26565	0.958283	1.12213	1.2102	1.23754	1.15883	1.31179	1.23591	1.04409	1.12208	1.23363	1.14788	1.36218
18.6667	1.06291	1.22792	1.31719	1.00741	1.17898	1.10455	1.01722	2.28862	1.4507	1.13947	1.16461	0.926114	1.04793	1.18442	1.77207	1.03224	1.23386	1.08974	1.0821	1.25034	0.937811	1.11476	1.23923	1.1973	1.15261	1.35732	1.21117	1.02691	1.10751	1.24627	1.20972	1.28019
18.8333	1.02837	1.22263	1.30534	0.968143	1.16783	1.10832	1.02858	2.37761	1.50491	1.12308	1.14141	0.889512	0.997232	1.18631	1.72876	1.03657	1.18564	1.05081	1.0842	1.27727	0.953532	1.10663	1.29794	1.20528	1.14626	1.35961	1.20335	1.02076	1.10464	1.28382	1.17126	1.4103
19	1.02216	1.23501	1.28746	0.994854	1.17181	1.11663	0.999013	2.37717	1.52357	1.09905	1.13199	0.979809	0.998097	1.18412	1.75667	1.03428	1.21318	1.05472	1.09176	1.25022	0.938903	1.11627	1.21936	1.18521	1.13641	1.28966	1.20118	1.01616	1.08197	1.24555	1.15211	1.36284
19.1667	1.02887	1.23579	1.30355	0.899487	1.16456	1.10221	1.01193	2.38516	1.5374	1.08898	1.13863	0.959979	1.01524	1.19482	1.66647	1.04053	1.18648	1.04171	1.08403	1.24953	0.963746	1.11187	1.25424	1.20332	1.1421	1.32929	1.21315	1.04537	1.0442	1.21267	1.17803	1.36946
19.3333	1.02629	1.24915	1.30717	0.913383	1.16564	1.11529	1.01405	2.39809	1.53888	1.03885	1.14321	0.913237	1.02372	1.21176	1.68508	1.05236	1.15557	1.05457	1.06121	1.24354	0.961025	1.12259	1.26889	1.22471	1.15578	1.31629	1.17527	1.00659	1.0525	1.19967	1.24443	1.51979
19.5	1.04016	1.23776	1.28853	0.952117	1.16378	1.11457	1.00801	2.42907	1.51967	1.04123	1.11506	0.885118	0.981732	1.20429	1.61706	1.05016	1.19536	1.05578	1.07846	1.27099	0.959466	1.11061	1.27249	1.24847	1.18502	1.24961	1.186	1.01739	1.09718	1.18797	1.25986	1.44311
19.6667	1.00919	1.23711	1.28705	0.93097	1.16347	1.12418	0.998342	2.41644	1.51354	1.05888	1.12056	0.936662	1.00255	1.20966	1.67367	1.0617	1.20373	1.06504	1.07808	1.25717	0.936655	1.13663	1.30872	1.2139	1.1794	1.30609	1.17646	0.985272	1.06834	1.18814	1.22801	1.40339
19.8333	0.991386	1.2333	1.28434	1.00601	1.15712	1.12109	1.00838	2.39708	1.51821	1.08055	1.14836	0.911108	1.04356	1.18522	1.71561	1.04723	1.16135	1.05033	1.08072	1.27783	0.981694	1.14414	1.29368	1.25967	1.202	1.2791	1.17088	1.0277	1.07616	1.1802	1.22301	1.49167
20	0.974891	1.22536	1.28506	0.924579	1.16712	1.13231	1.01181	2.3714	1.47905	1.12203	1.14427	0.89295	1.0077	1.18449	1.6866	1.05051	1.19028	1.0765	1.09705	1.23672	0.972518	1.10448	1.30071	1.23029	1.16651	1.29382	1.18547	0.987828	1.04558	1.16726	1.21468	1.39051
20.1667	0.980312	1.22816	1.25448	0.957586	1.1699	1.12253	1.00521	2.28173	1.48354	1.14736	1.13039	0.872876	1.00353	1.18258	1.77762	1.04853	1.163	1.07418	1.06216	1.21488	0.968247	1.12049	1.29621	1.21013	1.17519	1.22305	1.18276	0.980755	1.02033	1.15092	1.1976	1.50202
20.3333	0.97382	1.235	1.26744	0.972321	1.15372	1.12518	1.01863	2.32427	1.54816	1.21418	1.15792	0.852117	1.06518	1.15767	1.7141	1.03751	1.15051	1.03311	1.05541	1.21151	0.968663	1.07327	1.31477	1.2623	1.12257	1.28787	1.15093	0.954888	1.0707	1.10552	1.23943	1.39969
20.5	0.991446	1.23621	1.26979	0.909533	1.16285	1.14586	1.01039	2.4099	1.56903	1.17586	1.15588	0.927393	1.04959	1.15562	1.67108	1.05066	1.16009	1.02778	1.03418	1.19247	0.960967	1.07982	1.28763	1.23959	1.14719	1.30022	1.18041	0.992609	1.03285	1.11166	1.24512	1.34153
20.6667	0.988233	1.23397	1.25899	0.929988	1.16311	1.13575	1.02177	2.39192	1.54903	1.20425	1.15234	0.924728	1.02907	1.17069	1.6635	1.0512	1.17339	1.06169	1.05766	1.20889	0.963634	1.06763	1.27107	1.2441	1.15692	1.34352	1.19913	0.977397	1.04936	1.10053	1.29839	1.37353
20.8333	0.986722	1.23232	1.28679	0.872549	1.16033	1.12547	1.02068	2.34277	1.5315	1.17152	1.14051	0.860292	1.03443	1.14552	1.70627	1.03084	1.15911	1.05498	1.01266	1.20059	0.972884	1.06838	1.2998	1.23508	1.13348	1.34401	1.23327	0.98164	1.06665	1.11092	1.31833	1.36195
21	0.987397	1.23131	1.28168	0.903654	1.15387	1.11806	1.01734	2.33161	1.53128	1.15182	1.16459	0.853854	1.05496	1.13488	1.68894	1.03205	1.15446	1.05089	1.02558	1.21214	0.947325	1.07281	1.30836	1.22928	1.14506	1.32215	1.19902	0.995573	1.02086	1.11602	1.34207	1.29983
21.1667	1.01136	1.22017	1.27127	0.899721	1.1486	1.10617	1.00419	2.38372	1.54065	1.13359	1.14842	0.873755	1.03577	1.14559	1.64217	1.04652	1.1372	1.0463	1.03484	1.1952	0.977478	1.07943	1.31876	1.20958	1.15083	1.38132	1.21191	0.991113	1.0211	1.0788	1.31849	1.22223
21.3333	0.984326	1.21297	1.25874	0.912938	1.15369	1.07438	1.02058	2.41568	1.51099	1.14968	1.13577	0.901989	1.02723	1.16414	1.71054	1.04321	1.13474	1.06276	1.01998	1.19524	0.954344	1.06127	1.3485	1.22754	1.14148	1.30238	1.22121	0.995975	1.01541	1.07829	1.35946	1.30033
21.5	0.959618	1.20517	1.26387	0.874557	1.15603	1.08005	1.01076	2.38314	1.56016	1.17668	1.11795	0.905048	1.02323	1.1599	1.76527	1.05245	1.13221	1.03493	0.994326	1.21126	0.991913	1.09624	1.32979	1.27109	1.14688	1.3155	1.21549	1.01679	0.985852	1.05788	1.35693	1.25241
21.6667	0.961048	1.21581	1.29454	0.843852	1.17144	1.10654	1.03561	2.41503	1.5344	1.2435	1.15804	0.867731	1.07605	1.15974	1.862	1.05741	1.15121	1.0665	1.00202	1.20774	0.963075	1.06997	1.33518	1.25879	1.16311	1.29402	1.20068	1.0413	1.00702	1.04868	1.34689	1.2533
21.8333	0.96676	1.21858	1.27715	0.853091	1.17141	1.11927	1.02487	2.4452	1.51994	1.28439	1.14335	0.917996	1.05295	1.13842	1.88108	1.04679	1.13266	1.066	0.985903	1.21758	0.952913	1.07557	1.32031	1.27595	1.15646	1.35653	1.22207	0.997577	1.01981	1.05815	1.34251	1.16167
22	0.983996	1.22167	1.26729	0.883759	1.15712	1.12639	1.01587	2.56474	1.53335	1.286	1.13106	0.886661	1.01177	1.14757	1.81695	1.05035	1.13897	1.06257	0.971316	1.21825	0.969702	1.0842	1.2924	1.26957	1.18649	1.29384	1.22651	1.01632	1.01647	1.05015	1.3749	1.25693
22.1667	0.986983	1.21292	1.24993	0.903962	1.17707	1.13038	1.03091	2.47484	1.56887	1.3609	1.13507	0.881516	1.01656	1.14184	1.8104	1.04423	1.12812	1.0537	0.967548	1.21324	0.969766	1.10122	1.28631	1.25666	1.14105	1.2523	1.20757	1.03649	0.981265	1.03664	1.37648	1.35551
22.3333	1.00701	1.22319	1.25594	0.935719	1.15634	1.11677	1.02114	2.47386	1.58604	1.35599	1.1427	0.895808	1.05434	1.1363	1.74991	1.03903	1.14138	1.0821	0.961292	1.2056	0.944857	1.09133	1.25261	1.271	1.21754	1.35812	1.19704	1.00359	0.980411	1.03791	1.26688	1.1906
22.5	0.984878	1.2167	1.25591	0.922717	1.16366	1.11457	1.04359	2.52103	1.59657	1.36743	1.12499	0.920497	1.02363	1.13808	1.71783	1.05133	1.12433	1.07738	0.939816	1.21854	0.945444	1.09244	1.23428	1.27812	1.19106	1.27246	1.16681	0.991482	0.967027	1.04883	1.33031	1.1049
22.6667	0.978226	1.21197	1.24562	0.856396	1.17239	1.13264	1.05241	2.51754	1.62334	1.44488	1.1034	0.91721	1.0033	1.15469	1.68019	1.07749	1.11746	1.08307	0.941161	1.23537	0.948301	1.08164	1.23495	1.26333	1.20125	1.28996	1.16256	0.976476	0.960821	1.01998	1.2616	1.2195
22.8333	0.98004	1.20396	1.26429	0.879994	1.17193	1.12194	1.04654	2.52355	1.56222	1.52852	1.12685	0.943064	1.05569	1.14687	1.74188	1.06891	1.13437	1.09575	0.931972	1.2276	0.941968	1.08669	1.23479	1.31599	1.17102	1.30396	1.1286	0.951466	0.972621	0.987813	1.23259	1.22284
23	1.00152	1.22439	1.26369	0.87991	1.15542	1.12685	1.04634	2.49242	1.60892	1.50085	1.14098	0.945258	1.0305	1.13825	1.7984	1.06159	1.15536	1.09576	0.920512	1.21504	0.929985	1.08348	1.22058	1.2541	1.13493	1.20222	1.12129	0.972419	0.938696	1.02623	1.21885	1.25915
23.1667	1.0081	1.23012	1.29226	0.881404	1.17352	1.13344	1.05402	2.53504	1.59746	1.43283	1.12779	0.890163	1.02091	1.15617	1.76992	1.06176	1.15294	1.11706	0.9235	1.22332	0.933794	1.07153	1.25547	1.2866	1.14999	1.22811	1.10119	0.937221	0.987093	1.00723	1.26534	1.3119
23.3333	1.02056	1.23938	1.28696	0.88418	1.16789	1.1302	1.02871	2.58262	1.59805	1.37541	1.12759	0.926836	1.02647	1.15354	1.76422	1.04611	1.15929	1.08543	0.909933	1.22822	0.967103	1.08152	1.22596	1.28205	1.13621	1.23242	1.12593	0.956882	0.994124	1.02896	1.27224	1.3485
23.5	0.995645	1.22811	1.30041	0.817286	1.16974	1.1605	1.04523	2.54487	1.59171	1.38694	1.1207	0.932445	1.03581	1.15856	1.80185	1.06949	1.14592	1.09825	0.901643	1.21467	0.925084	1.07358	1.23729	1.28499	1.13058	1.2234	1.0939	0.953083	0.948763	1.03213	1.24389	1.24568
23.6667	0.972214	1.22841	1.30578	0.812931	1.17076	1.10419	1.03482	2.51808	1.59093	1.32296	1.14125	0.931567	1.04225	1.14561	1.80163	1.04514	1.14292	1.06244	0.889113	1.21025	0.951691	1.08528	1.18615	1.29065	1.14083	1.21196	1.09117	0.897618	0.969082	1.04012	1.19181	1.26488
23.8333	0.975257	1.22428	1.29074	0.883817	1.17393	1.11759	1.03157	2.51865	1.62771	1.25978	1.11905	0.9098	1.01147	1.1327	1.78305	1.05283	1.13071	1.08979	0.87563	1.22188	0.977074	1.10477	1.16841	1.28491	1.18283	1.25168	1.0911	0.905086	0.939432	1.00261	1.23637	1.18533
24	0.997771	1.24104	1.27121	0.887683	1.17602	1.14937	1.0403	2.61489	1.59664	1.27309	1.12737	0.923392	1.01695	1.13483	1.75227	1.035	1.14139	1.09461	0.874277	1.19978	0.937702	1.09965	1.17676	1.29016	1.18133	1.24865	1.07266	0.867071	0.978357	0.987551	1.17724	1.1662
24.1667	1.00087	1.24768	1.27002	0.869075	1.17057	1.1085	1.03006	2.62	1.55497	1.29124	1.1326	0.971498	1.03182	1.13324	1.75651	1.0421	1.14782	1.08071	0.874841	1.18758	0.946685	1.08136	1.19407	1.34209	1.16316	1.31874	1.07502	0.856486	0.963509	0.999417	1.18822	1.13271
24.3333	0.982547	1.25175	1.26679	0.87097	1.16111	1.09925	1.03479	2.63599	1.5835	1.30982	1.12216	0.924306	0.984116	1.1462	1.89157	1.06368	1.15139	1.05178	0.87707	1.1762	0.928382	1.08278	1.193	1.32937	1.21258	1.35926	1.06319	0.877448	0.950232	1.00232	1.20863	1.14828
24.5	0.943087	1.25915	1.27065	0.864428	1.16567	1.11798	1.03622	2.56344	1.60961	1.22251	1.1343	0.943229	1.00793	1.14833	1.7577	1.06972	1.12042	1.06305	0.872005	1.17627	0.938239	1.07463	1.20998	1.3036	1.18289	1.31575	1.06428	0.872003	1.0069	1.03645	1.18749	1.21145
24.6667	0.951707	1.256	1.26736	0.850725	1.15151	1.09462	1.04273	2.61165	1.58314	1.17196	1.13264	0.885296	1.0329	1.13489	1.74461	1.06584	1.12545	1.07551	0.847084	1.16975	0.926612	1.08955	1.19149	1.32682	1.16613	1.33247	1.00626	0.878725	0.941366	1.00165	1.18996	1.14884
24.8333	0.955053	1.25304	1.26567	0.862779	1.1451	1.11597	1.03636	2.64287	1.58675	1.17496	1.12056	0.89465	0.976958	1.14999	1.80871	1.06658	1.11035	1.08526	0.850203	1.18079	0.920815	1.09483	1.24055	1.35825	1.14904	1.38104	1.0507	0.902119	0.904989	1.04665	1.20478	1.27647
25	0.974004	1.25101	1.25027	0.833672	1.1345	1.09601	1.03303	2.62887	1.56125	1.15687	1.13613	0.904726	0.988911	1.15294	1.81876	1.07437	1.13415	1.07602	0.835609	1.17663	0.913784	1.07514	1.18548	1.27254	1.14638	1.33614	1.0032	0.903575	0.898433	0.991115	1.1642	1.09378
25.1667	0.981355	1.27927	1.24872	0.872282	1.13757	1.08007	1.04763	2.64633	1.58567	1.15968	1.12572	0.907685	1.02509	1.14339	1.74175	1.06713	1.1713	1.09473	0.81578	1.18323	0.913991	1.06694	1.22256	1.31937	1.14856	1.36888	1.04196	0.902702	0.932481	1.01258	1.17482	1.1236
25.3333	0.986554	1.26688	1.24251	0.82238	1.13072	1.08102	1.05732	2.62472	1.57191	1.1882	1.15059	0.86225	1.04543	1.14722	1.76623	1.06482	1.15396	1.10468	0.812886	1.18032	0.894017	1.09015	1.18518	1.29439	1.12932	1.3195	0.98533	0.932215	0.894998	1.03455	1.14633	1.1505
25.5	0.992004	1.27275	1.2668	0.836049	1.1497	1.123	1.05213	2.67857	1.61127	1.13379	1.13172	0.88023	1.01907	1.13873	1.78843	1.07549	1.15389	1.11822	0.795332	1.17578	0.921533	1.09688	1.15004	1.30014	1.20564	1.34188	0.984681	0.928706	0.901495	1.04239	1.15055	1.1274
25.6667	0.981503	1.27519	1.27377	0.867861	1.15393	1.08774	1.06397	2.62861	1.63659	1.15089	1.12583	0.857498	0.97966	1.13544	1.75165	1.06576	1.1606	1.12337	0.788245	1.17287	0.932791	1.09595	1.15456	1.26304	1.14083	1.30951	1.00513	0.912908	0.895686	1.05541	1.14198	1.1112
25.8333	1.0069	1.27349	1.28444	0.867488	1.14943	1.06152	1.05422	2.67752	1.63661	1.13995	1.13421	0.885582	0.99157	1.13463	1.83362	1.08156	1.1475	1.09595	0.784908	1.18062	0.939823	1.08608	1.13436	1.2705	1.1608	1.25184	0.987504	0.895743	0.88349	1.02764	1.11165	1.04833
26	1.01027	1.2652	1.24816	0.787207	1.13828	1.07012	1.05643	2.71587	1.62757	1.12812	1.16076	0.856562	1.02011	1.13479	1.82095	1.07615	1.12659	1.08345	0.786399	1.18538	0.928828	1.0956	1.10888	1.23418	1.20885	1.34803	1.02816	0.911273	0.907168	1.00836	1.08051	1.05306
26.1667	1.00874	1.25961	1.25481	0.850151	1.14619	1.07156	1.05561	2.72324	1.68021	1.19593	1.14867	0.882309	1.01106	1.14848	1.83727	1.09812	1.1177	1.08589	0.774132	1.18535	0.949612	1.11233	1.17363	1.33656	1.18152	1.32345	1.01555	0.841765	0.878382	0.983215	1.04635	1.21899
26.3333	0.994821	1.26393	1.24637	0.861545	1.14491	1.10605	1.04742	2.73491	1.67975	1.08884	1.14841	0.894436	1.01371	1.17437	1.87671	1.08077	1.10049	1.08843	0.789665	1.18773	0.95052	1.1048	1.1639	1.29033	1.18771	1.29896	1.02067	0.862257	0.862423	0.971533	1.11437	1.15427
26.5	1.01133	1.25454	1.25364	0.829941	1.14814	1.08752	1.05432	2.69785	1.66114	1.18091	1.1396	0.894679	1.00747	1.15684	1.84291	1.09334	1.12853	1.08763	0.787139	1.18667	0.948877	1.10801	1.14575	1.26931	1.22704	1.23612	1.02386	0.879319	0.853502	0.977975	1.06951	1.01295
26.6667	1.02253	1.27376	1.27699	0.833524	1.14601	1.10001	1.0982	2.67837	1.65066	1.10744	1.15039	0.863122	1.04201	1.15464	1.81903	1.08729	1.11872	1.10057	0.763388	1.19586	0.961762	1.12676	1.12216	1.29455	1.18342	1.29644	1.03648	0.848243	0.851687	0.961044	1.04647	1.13441
26.8333	0.985771	1.27232	1.27396	0.861422	1.1579	1.08966	1.1023	2.68815	1.64857	1.12868	1.16816	0.873977	1.00784	1.16516	1.7847	1.09905	1.11582	1.08882	0.745745	1.21512	0.96368	1.12101	1.19244	1.28796	1.19765	1.30778	1.03117	0.830809	0.882098	0.970652	1.05944	0.938797
27	0.989933	1.27539	1.27258	0.822105	1.14598	1.05808	1.08498	2.74618	1.59337	1.10383	1.18898	0.866931	1.0094	1.13981	1.66962	1.07642	1.13495	1.09844	0.754128	1.19282	0.933321	1.13591	1.17996	1.33373	1.18185	1.3436	1.05655	0.81986	0.833526	0.949915	1.03503	1.02853
27.1667	0.996353	1.26301	1.24519	0.87179	1.14294	1.05624	1.07062	2.77072	1.59542	1.16292	1.16661	0.868767	1.01804	1.15103	1.76323	1.09184	1.10495	1.08393	0.731781	1.19042	0.952089	1.12478	1.18474	1.28516	1.21319	1.33047	1.04848	0.833664	0.872613	0.949635	1.00552	1.0063
27.3333	0.990789	1.27072	1.24429	0.823751	1.1344	1.07337	1.10307	2.69458	1.60184	1.19785	1.1764	0.838719	1.03863	1.15797	1.98343	1.09978	1.07787	1.08342	0.731727	1.17753	0.961999	1.13248	1.15239	1.27403	1.23033	1.29309	1.0651	0.824547	0.91585	0.921759	1.03283	0.959047
27.5	0.996537	1.26717	1.22237	0.787368	1.15278	1.08234	1.08048	2.74384	1.6137	1.26312	1.15127	0.856026	1.00708	1.16392	2.06991	1.10467	1.08623	1.09874	0.722774	1.18422	0.954263	1.10355	1.12382	1.26697	1.20245	1.33671	1.05589	0.849436	0.899164	0.915047	1.00765	0.962892
27.6667	0.959211	1.27782	1.23897	0.805041	1.13435	1.0202	1.07745	2.78733	1.59491	1.24259	1.16279	0.875928	1.01546	1.14442	2.13534	1.08574	1.07354	1.1116	0.713247	1.16194	0.929597	1.10344	1.12985	1.28115	1.21086	1.34296	1.05285	0.843157	0.909207	0.978965	0.987363	0.933686
27.8333	0.993211	1.28139	1.23763	0.776931	1.14675	1.037	1.09051	2.76925	1.59139	1.29526	1.14669	0.827456	1.01561	1.15119	2.06144	1.10556	1.08246	1.11844	0.70601	1.16568	0.929016	1.11794	1.12618	1.27145	1.17797	1.33837	1.03213	0.845073	0.898356	0.957397	0.999733	0.975523
28	0.999292	1.28258	1.24314	0.756327	1.16404	1.06819	1.09812	2.76996	1.55074	1.34678	1.14196	0.84733	0.982343	1.14285	1.95632	1.08729	1.08889	1.11949	0.701095	1.14041	0.941736	1.1321	1.07587	1.30916	1.19433	1.32682	1.01687	0.836102	0.871957	0.947335	0.991084	1.06785
28.1667	0.996206	1.27666	1.23558	0.816952	1.15967	1.06199	1.08727	2.77914	1.50514	1.40121	1.13781	0.818645	0.999168	1.15172	1.97111	1.08858	1.08891	1.13402	0.702435	1.16648	0.942181	1.12183	1.05509	1.3104	1.20482	1.3072	1.00869	0.825876	0.850694	0.978347	0.946293	0.949967
28.3333	1.01796	1.27466	1.22382	0.810047	1.1495	1.03244	1.1021	2.84434	1.51823	1.44657	1.13722	0.842692	1.02185	1.16065	1.98756	1.10484	1.09673	1.14712	0.692328	1.15926	0.919812	1.13331	1.10125	1.29109	1.20525	1.34151	1.01365	0.860025	0.885207	1.00039	0.994049	0.984406
28.5	1.00313	1.28714	1.21738	0.752494	1.15484	1.0576	1.10035	2.82344	1.47401	1.49883	1.14399	0.810106	0.992443	1.16937	1.99205	1.12076	1.10526	1.12834	0.676445	1.13082	0.883432	1.12169	1.09282	1.28322	1.21133	1.29488	1.00767	0.819684	0.877796	0.964121	0.953373	0.999471
28.6667	0.990955	1.29927	1.20872	0.728544	1.14315	1.01399	1.09471	2.89055	1.52668	1.53673	1.14629	0.853204	1.00308	1.18037	1.95504	1.10154	1.07892	1.11001	0.670761	1.14673	0.917436	1.10897	1.08068	1.26693	1.2005	1.32368	1.03307	0.787506	0.898083	0.942689	0.931374	0.952803
28.8333	0.990847	1.2949	1.21019	0.754316	1.13088	1.01652	1.1078	2.81635	1.52755	1.59287	1.1542	0.862057	1.02088	1.18529	2.03713	1.10856	1.09328	1.15459	0.675036	1.13761	0.902707	1.11748	1.14139	1.29697	1.15894	1.31677	1.04674	0.774246	0.869992	0.94516	0.97399	0.990572
29	0.979917	1.30313	1.19337	0.788772	1.14297	1.04385	1.09741	2.81094	1.5869	1.54462	1.15653	0.838075	1.03117	1.1765	1.95095	1.09549	1.06585	1.12956	0.64493	1.13642	0.920785	1.13603	1.08911	1.23186	1.14159	1.34455	1.02456	0.795876	0.894594	0.948949	0.937487	0.905966
29.1667	0.983635	1.30339	1.21748	0.783405	1.1348	1.0467	1.094	2.82175	1.62631	1.57452	1.13835	0.856105	1.00491	1.17784	1.9084	1.09266	1.06397	1.11673	0.66005	1.12541	0.931533	1.1303	1.104	1.2575	1.21534	1.35761	1.02825	0.770487	0.913909	0.939392	0.943444	0.86528
29.3333	0.989658	1.30125	1.19505	0.802733	1.14362	1.02653	1.10356	2.82723	1.65104	1.56373	1.14451	0.847137	1.05008	1.17248	1.90755	1.08523	1.05335	1.09005	0.649204	1.14816	0.960682	1.15947	1.11157	1.24222	1.19097	1.33821	1.05433	0.822481	0.902162	0.940981	0.938102	0.91291
29.5	0.971049	1.29465	1.19978	0.760528	1.14652	1.03495	1.09887	2.82574	1.64129	1.61529	1.14848	0.833395	1.05627	1.17742	1.9122	1.08041	1.05874	1.10316	0.662986	1.11577	0.900974	1.13886	1.16646	1.26284	1.16837	1.33284	1.02288	0.839671	0.920559	0.900024	0.939442	0.86599
[truncated: 114 more columns]
