# Supplementary material for: Genetic code expansion, click chemistry, and light-activated PI3K reveal details of membrane protein trafficking downstream of receptor tyrosine kinases
Source: eLife. 2024 Aug 20;12:RP91012. doi: 10.7554/eLife.91012 (PMC11335347; doi:10.7554/eLife.91012)
Supplement: Figure 2—source data 2. [file elife-91012-fig2-data2.xlsx]

## Sheet: Opto3K
Akt-PH	Removed data points as shown in Figure 3														Average (first 3 min)													Akt-PH	Renormalized using the first 3 min																		Average (20 s interval, 2.62-2.95 and 10.8-11.1)
Time	Akt.PHwISH.TRPV1_UP_X5.11.16slip4_cell5	Akt.PHwISH.TRPV1_UP_X5.11.16slip4_cell6	Akt.PHwISH.TRPV1_UP_X5.11.16slip6_cell2	Akt.PHwISH.TRPV1_UP_X5.11.16slip6_cell4	Akt.PHwISH.TRPV1_UP_X5.11.16slip6_cell5	Akt.PHwISH.TRPV1_UP_X5.11.16slip6_cell7	Akt.PHwISH.TRPV1_UP_X5.24.16slp1_cell4	Akt.PHwISH.TRPV1_UP_X5.24.16slp3_cell1	Akt.PHwISH.TRPV1_UP_X5.24.16slp3_cell2	Akt.PHwISH.TRPV1_UP_X5.24.16slp3_cell3	Akt.PHwISH.TRPV1_UP_X5.24.16slp5_cell1	Akt.PHwISH.TRPV1_UP_X5.24.16slp5_cell3	Akt.PHwISH.TRPV1_UP_X5.24.16slp6_cell3		Akt.PHwISH.TRPV1_UP_X5.11.16slip4_cell5	Akt.PHwISH.TRPV1_UP_X5.11.16slip4_cell6	Akt.PHwISH.TRPV1_UP_X5.11.16slip6_cell2	Akt.PHwISH.TRPV1_UP_X5.11.16slip6_cell4	Akt.PHwISH.TRPV1_UP_X5.11.16slip6_cell5	Akt.PHwISH.TRPV1_UP_X5.11.16slip6_cell7	Akt.PHwISH.TRPV1_UP_X5.24.16slp1_cell4	Akt.PHwISH.TRPV1_UP_X5.24.16slp3_cell1	Akt.PHwISH.TRPV1_UP_X5.24.16slp3_cell2	Akt.PHwISH.TRPV1_UP_X5.24.16slp3_cell3	Akt.PHwISH.TRPV1_UP_X5.24.16slp5_cell1	Akt.PHwISH.TRPV1_UP_X5.24.16slp5_cell3	Akt.PHwISH.TRPV1_UP_X5.24.16slp6_cell3	Time	Akt.PHwISH.TRPV1_UP_X5.11.16slip4_cell5	Akt.PHwISH.TRPV1_UP_X5.11.16slip4_cell6	Akt.PHwISH.TRPV1_UP_X5.11.16slip6_cell2	Akt.PHwISH.TRPV1_UP_X5.11.16slip6_cell4	Akt.PHwISH.TRPV1_UP_X5.11.16slip6_cell5	Akt.PHwISH.TRPV1_UP_X5.11.16slip6_cell7	Akt.PHwISH.TRPV1_UP_X5.24.16slp1_cell4	Akt.PHwISH.TRPV1_UP_X5.24.16slp3_cell1	Akt.PHwISH.TRPV1_UP_X5.24.16slp3_cell2	Akt.PHwISH.TRPV1_UP_X5.24.16slp3_cell3	Akt.PHwISH.TRPV1_UP_X5.24.16slp5_cell1	Akt.PHwISH.TRPV1_UP_X5.24.16slp5_cell3	Akt.PHwISH.TRPV1_UP_X5.24.16slp6_cell3	Average	SD	number	SEM		Akt.PHwISH.TRPV1_UP_X5.11.16slip4_cell5	Akt.PHwISH.TRPV1_UP_X5.11.16slip4_cell6	Akt.PHwISH.TRPV1_UP_X5.11.16slip6_cell2
0.327869	1.02589	1.14629	0.974718	0.932189	0.91805	1.00158	0.973017	0.956269	0.906207	0.890324	1.16257	1.09476	0.986646		1.00615	1.03378	0.985164	0.969679	0.967424	0.993968	0.9987	0.980018	0.961621	0.968192	1.04489	1.01954	0.99169	0.327869	1.01962	1.10883	0.989397	0.961338	0.948963	1.00766	0.974284	0.975767	0.942375	0.919574	1.11266	1.07377	0.994913	1.00224	0.0616662	13	0.0171031
0.655738	1.00297	1.05714	0.991664	0.928956	0.922803	0.998235	0.987556	0.954658	0.907199	0.913217	1.09386	1.11274	0.982234															0.655738	0.996844	1.02259	1.0066	0.958004	0.953876	1.00429	0.988841	0.974123	0.943406	0.943219	1.04689	1.09141	0.990465	0.99389	0.0426763	13	0.0118363
0.983607	1.03334	1.05125	0.991808	0.921794	0.927797	0.973177	1.00037	0.960936	0.92031	0.963836	1.05883	0.990721	0.982566															0.983607	1.02702	1.0169	1.00674	0.950618	0.959038	0.979082	1.00167	0.980528	0.957041	0.995501	1.01337	0.97173	0.990799	0.988465	0.0244873	13	0.00679156
1.31148	1.01215	1.07099	0.951741	0.946158	0.965841	0.986136	1.00065	0.97383	0.937498	0.952715	1.05297	1.0306	0.985796															1.31148	1.00596	1.03599	0.966074	0.975743	0.998363	0.992121	1.00196	0.993686	0.974914	0.984014	1.00776	1.01085	0.994056	0.995499	0.0182883	13	0.00507227
1.63934	0.985643	1.02934	0.913949	0.950038	0.963043	0.984396	0.998648	0.972433	0.943389	0.98416	1.01961	1.06169	0.987677															1.63934	0.979618	0.995704	0.927712	0.979745	0.995472	0.99037	0.999948	0.99226	0.98104	1.01649	0.975837	1.04134	0.995954	0.990115	0.0256797	13	0.00712226		0.99279	1.01585	0.946893
1.96721	0.981676	1.00213	0.967702	0.975211	0.993991	0.992498	1.00065	0.987151	0.968148	0.983708	1.00697	1.02587	1.01122															1.96721	0.975675	0.969381	0.982275	1.00571	1.02746	0.998521	1.00195	1.00728	1.00679	1.01603	0.963735	1.0062	1.01969	0.998515	0.0198008	13	0.00549175
2.29508	0.97987	0.967741	0.987802	1.01166	1.0028	1.00533	0.999835	0.997898	0.997759	1.00227	0.986014	0.985487	1.00054															2.29508	0.97388	0.936118	1.00268	1.04329	1.03657	1.01143	1.00114	1.01824	1.03758	1.0352	0.94368	0.966597	1.00893	1.00118	0.0358786	13	0.00995095
2.62295	1.01114	1.00277	1.05572	1.02394	1.02043	1.01673	1.0074	1.01241	1.03106	1.00697	1.00901	0.943473	0.993876															2.62295	1.00496	0.970004	1.07162	1.05595	1.05479	1.0229	1.00871	1.03306	1.07221	1.04006	0.965693	0.925388	1.0022	1.0175	0.044219	13	0.0122641
2.95082	1.02267	0.976386	1.03137	1.03717	0.992063	0.98762	1.02017	1.00457	1.04302	1.01652	1.01414	0.930541	0.994649															2.95082	1.01642	0.94448	1.0469	1.0696	1.02547	0.993613	1.0215	1.02506	1.08465	1.04991	0.970598	0.912704	1.00298	1.01261	0.0485283	13	0.0134593
3.27869	1.06164	0.953115	1.0765	1.0592	0.972537	0.968691	1.03026	1.01456	1.08487	1.09845	1.00154	0.836686	1.0254															3.27869	1.05515	0.92197	1.09271	1.09232	1.00528	0.974569	1.0316	1.03525	1.12817	1.13453	0.958541	0.820648	1.03399	1.0219	0.0877954	13	0.0243501
3.60656	1.08348	0.96826	1.13548	1.11385	1.0319	1.09187	1.04877	1.03424	1.16111	1.15573	1.06538	0.936549	1.02353															3.60656	1.07686	0.93662	1.15258	1.14868	1.06665	1.0985	1.05013	1.05532	1.20745	1.1937	1.01964	0.918597	1.0321	1.0736	0.0881287	13	0.0244425
3.93443	1.10751	1.00013	1.16452	1.1615	1.07114	1.17661	1.04068	1.06939	1.18616	1.15051	1.10644	0.995171	1.04284															3.93443	1.10074	0.967453	1.18206	1.19782	1.10721	1.18375	1.04204	1.09119	1.2335	1.18831	1.05894	0.976096	1.05158	1.10621	0.0860611	13	0.0238691
4.2623	1.13929	0.99879	1.31545	1.22811	1.0764	1.24778	1.02759	1.10045	1.18772	1.16259	1.12665	0.949098	1.05542															4.2623	1.13232	0.966153	1.33526	1.26651	1.11264	1.25536	1.02892	1.12289	1.23512	1.20078	1.07828	0.930906	1.06426	1.13303	0.12127	13	0.0336342
4.59016	1.17413	0.990912	1.35915	1.28957	1.13704	1.36301	1.01664	1.1217	1.16108	1.14961	1.15347	0.980521	1.05936															4.59016	1.16695	0.958532	1.37962	1.32989	1.17533	1.37128	1.01796	1.14457	1.20742	1.18738	1.10394	0.961726	1.06824	1.15945	0.140502	13	0.0389682
4.91803	1.21771	0.966098	1.34447	1.30097	1.13829	1.37262	1.00045	1.12307	1.14545	1.14918	1.16708	0.898957	1.06998															4.91803	1.21027	0.934529	1.36472	1.34165	1.17662	1.38095	1.00175	1.14597	1.19117	1.18693	1.11697	0.881725	1.07895	1.15479	0.155404	13	0.0431014
5.2459	1.26664	0.964729	1.46351	1.3201	1.14874	1.38702	1.00723	1.14364	1.16696	1.15709	1.1616	0.996327	1.09674															5.2459	1.2589	0.933205	1.48555	1.36138	1.18742	1.39543	1.00854	1.16696	1.21353	1.1951	1.11172	0.977229	1.10593	1.18468	0.163746	13	0.0454151
5.57377	1.3473	0.985274	1.49081	1.31516	1.14663	1.44109	1.01651	1.15472	1.23416	1.18976	1.19443	1.02726	1.11372															5.57377	1.33907	0.953078	1.51326	1.35629	1.18524	1.44983	1.01783	1.17827	1.28341	1.22884	1.14314	1.00757	1.12306	1.21376	0.170946	13	0.047412
5.90164	1.45821	0.98785	1.54692	1.30461	1.14443	1.4264	1.03183	1.15023	1.24113	1.21602	1.21234	1.08436	1.11836															5.90164	1.4493	0.95557	1.57022	1.3454	1.18297	1.43506	1.03317	1.17368	1.29067	1.25597	1.16029	1.06357	1.12773	1.23412	0.179303	13	0.0497298
6.22951	1.51326	1.02174	1.60465	1.30169	1.16985	1.41836	1.04637	1.14984	1.23955	1.21583	1.21714	1.1191	1.15717															6.22951	1.50401	0.988349	1.62881	1.3424	1.20924	1.42697	1.04773	1.17329	1.28902	1.25577	1.16488	1.09765	1.16687	1.25346	0.183385	13	0.0508618
6.55738	1.51144	1.04331	1.58099	1.31309	1.16363	1.45193	1.05205	1.12827	1.23051	1.21385	1.23339	1.10364	1.11667															6.55738	1.5022	1.00922	1.6048	1.35415	1.20281	1.46075	1.05342	1.15127	1.27962	1.25373	1.18044	1.08248	1.12603	1.25084	0.183143	13	0.0507947
6.88525	1.56305	1.07728	1.62648	1.35198	1.15909	1.46063	1.07678	1.10131	1.25559	1.20402	1.20734	1.0564	1.121															6.88525	1.5535	1.04208	1.65097	1.39426	1.19812	1.46949	1.07818	1.12376	1.3057	1.24357	1.15551	1.03615	1.13039	1.26013	0.200838	13	0.0557024
7.21311	1.67892	1.08748	1.68818	1.37277	1.17316	1.47426	1.08017	1.10381	1.24535	1.26197	1.21175	1.0965	1.11364															7.21311	1.66866	1.05195	1.7136	1.41569	1.21267	1.48321	1.08157	1.12632	1.29505	1.30343	1.15973	1.07548	1.12297	1.28541	0.223542	13	0.0619993
7.54098	1.72695	1.11772	1.6916	1.38003	1.17308	1.56779	1.09096	1.11132	1.26241	1.22624	1.197	1.02214	1.11657															7.54098	1.7164	1.0812	1.71707	1.42318	1.21258	1.57731	1.09238	1.13398	1.31279	1.26652	1.14561	1.00255	1.12593	1.29288	0.243042	13	0.0674077
7.86885	1.84384	1.16651	1.7361	1.42057	1.18579	1.61815	1.08338	1.10711	1.28754	1.22143	1.20536	0.914267	1.11229															7.86885	1.83257	1.12839	1.76224	1.46499	1.22572	1.62797	1.08479	1.12969	1.33892	1.26155	1.15361	0.896742	1.12161	1.30991	0.282837	13	0.0784449
8.19672	1.82423	1.18901	1.69235	1.42312	1.18547	1.63668	1.08012	1.10282	1.30803	1.29049	1.23791	1.04707	1.12432															8.19672	1.81308	1.15015	1.71784	1.46762	1.22539	1.64661	1.08153	1.1253	1.36024	1.33289	1.18476	1.027	1.13374	1.32817	0.258554	13	0.07171
8.52459	1.82171	1.23308	1.76029	1.40505	1.17941	1.62817	1.09749	1.12548	1.30676	1.33222	1.25014	1.13994	1.14197															8.52459	1.81057	1.19279	1.7868	1.44899	1.21912	1.63805	1.09892	1.14842	1.35891	1.37598	1.19647	1.11809	1.15153	1.34959	0.251447	13	0.0697388
8.85246	1.81903	1.23878	1.81339	1.40212	1.14989	1.60949	1.10404	1.14327	1.31165	1.29257	1.24965	1.1286	1.16545															8.85246	1.80791	1.1983	1.8407	1.44597	1.18861	1.61925	1.10548	1.16659	1.364	1.33503	1.19599	1.10696	1.17522	1.35	0.256323	13	0.0710913
9.18033	1.78558	1.26032	1.78331	1.40744	1.14136	1.62999	1.10276	1.15871	1.31792	1.27769	1.23088	1.14335	1.17715															9.18033	1.77467	1.21914	1.81016	1.45145	1.1798	1.63989	1.1042	1.18233	1.37052	1.31967	1.17803	1.12144	1.18702	1.3491	0.246772	13	0.0684421
9.5082	1.75482	1.23831	1.85625	1.42164	1.1541	1.67773	1.11428	1.17399	1.35649	1.30272	1.23766	1.09948	1.18299															9.5082	1.7441	1.19785	1.88421	1.4661	1.19296	1.68791	1.11574	1.19792	1.41062	1.34551	1.18453	1.0784	1.1929	1.36144	0.261724	13	0.0725893
9.83607	1.71894	1.23265	1.94312	1.41599	1.17779	1.69499	1.11492	1.18916	1.36311	1.31824	1.24626	1.16495	1.21801															9.83607	1.70843	1.19238	1.97238	1.46027	1.21745	1.70527	1.11637	1.21341	1.41752	1.36155	1.19275	1.14262	1.22821	1.37912	0.265534	13	0.0736459
10.1639	1.70015	1.24962	1.92371	1.43139	1.18856	1.74877	1.12942	1.17274	1.32036	1.27595	1.30162	1.13197	1.24096															10.1639	1.68976	1.20878	1.95268	1.47615	1.22859	1.75938	1.13089	1.19665	1.37306	1.31787	1.24573	1.11027	1.25136	1.38009	0.263981	13	0.0732152
10.4918	1.73449	1.26618	1.93482	1.42261	1.21707	1.81011	1.12033	1.17419	1.34392	1.22461	1.29615	1.19072	1.22623															10.4918	1.72389	1.22481	1.96396	1.46709	1.25805	1.8211	1.12178	1.19813	1.39756	1.26484	1.2405	1.1679	1.2365	1.39124	0.27342	13	0.075833
10.8197	1.73389	1.28519	1.95194	1.42807	1.21475	1.88067	1.13949	1.14667	1.3123	1.22709	1.2357	1.13234	1.2167															10.8197	1.72329	1.24319	1.98134	1.47272	1.25566	1.89208	1.14098	1.17005	1.36468	1.26741	1.18265	1.11063	1.2269	1.38704	0.293383	13	0.0813698
11.1475	1.76811	1.29026	1.9009	1.43575	1.21227	1.76294	1.16418	1.14962	1.32334	1.27284	1.22214	1.20698	1.18604															11.1475	1.7573	1.2481	1.92952	1.48064	1.25309	1.77364	1.16569	1.17306	1.37615	1.31466	1.16967	1.18384	1.19598	1.38626	0.266462	13	0.0739032		1.7403	1.24565	1.95543
11.4754	1.76459	1.2642	1.92475	1.44189	1.19851	1.69167	1.12228	1.16102	1.31804	1.2571	1.21757	1.13606	1.18559															11.4754	1.7538	1.22289	1.95374	1.48698	1.23887	1.70193	1.12374	1.1847	1.37064	1.2984	1.1653	1.11429	1.19553	1.37006	0.272121	13	0.0754728
11.8033	1.79594	1.31393	1.93707	1.46873	1.19839	1.68008	1.12346	1.15938	1.34099	1.277	1.17563	1.07229	1.16687															11.8033	1.78496	1.271	1.96624	1.51465	1.23874	1.69027	1.12492	1.18302	1.39451	1.31896	1.12516	1.05174	1.17665	1.37237	0.285045	13	0.0790572
12.1311	1.75749	1.28562	1.94095	1.47233	1.1888	1.67097	1.15106	1.15516	1.41433	1.24623	1.17457	1.01933	1.17766															12.1311	1.74674	1.24361	1.97018	1.51837	1.22883	1.68111	1.15256	1.17871	1.47078	1.28717	1.12414	0.999796	1.18753	1.36843	0.287012	13	0.0796029
12.459	1.72606	1.24457	1.96024	1.46169	1.17511	1.65381	1.14878	1.14033	1.40108	1.19133	1.18405	1.07767	1.1976															12.459	1.71551	1.2039	1.98976	1.5074	1.21468	1.66384	1.15028	1.16358	1.457	1.23047	1.13321	1.05701	1.20764	1.3611	0.282503	13	0.0783522
12.7869	1.72256	1.21198	1.97853	1.47515	1.19729	1.7272	1.16896	1.12308	1.40157	1.15712	1.22482	1.08373	1.17974															12.7869	1.71203	1.17238	2.00832	1.52127	1.23761	1.73768	1.17048	1.14598	1.4575	1.19514	1.17223	1.06295	1.18963	1.36794	0.293427	13	0.081382
13.1148	1.68747	1.20442	1.93463	1.47907	1.15831	1.70055	1.15474	1.14585	1.39061	1.19565	1.24955	1.02633	1.21222															13.1148	1.67715	1.16506	1.96376	1.52532	1.19732	1.71087	1.15624	1.16921	1.44611	1.23493	1.1959	1.00665	1.22238	1.3593	0.281619	13	0.0781071
13.4426	1.63747	1.20173	1.95498	1.4696	1.16877	1.69721	1.1585	1.14988	1.38239	1.24785	1.34016	1.00615	1.18889															13.4426	1.62746	1.16246	1.98442	1.51556	1.20813	1.70751	1.16001	1.17333	1.43756	1.28885	1.28263	0.986859	1.19886	1.36412	0.277695	13	0.0770186
13.7705	1.5799	1.1702	1.88948	1.46147	1.18134	1.723	1.18268	1.11428	1.3855	1.2621	1.34558	1.03145	1.19217															13.7705	1.57024	1.13196	1.91793	1.50717	1.22112	1.73346	1.18422	1.137	1.4408	1.30356	1.28781	1.01168	1.20216	1.35762	0.262936	13	0.0729254
14.0984	1.51847	1.16085	1.80547	1.4667	1.17737	1.71922	1.14235	1.12755	1.43327	1.25524	1.30076	1.04569	1.22368															14.0984	1.50918	1.12291	1.83266	1.51256	1.21702	1.72966	1.14384	1.15054	1.49047	1.29648	1.24491	1.02564	1.23393	1.34691	0.247083	13	0.0685285
14.4262	1.50992	1.18838	1.71387	1.45049	1.18019	1.69154	1.1667	1.10332	1.42673	1.2901	1.29182	1.07702	1.20581															14.4262	1.50069	1.14955	1.73968	1.49585	1.21993	1.70181	1.16822	1.12582	1.48367	1.33249	1.23636	1.05638	1.21591	1.34049	0.222505	13	0.0617117
14.7541	1.49057	1.20853	1.71744	1.46421	1.1808	1.72251	1.16166	1.11451	1.42922	1.31302	1.32681	1.27871	1.23205															14.7541	1.48145	1.16903	1.74331	1.50999	1.22056	1.73297	1.16317	1.13723	1.48626	1.35616	1.26985	1.2542	1.24238	1.36666	0.207382	13	0.0575174
15.082	1.4807	1.23405	1.63359	1.46577	1.20757	1.68065	1.19395	1.11244	1.39764	1.29522	1.31829	1.31486	1.22455															15.082	1.47165	1.19372	1.65819	1.51161	1.24823	1.69085	1.1955	1.13512	1.45342	1.33777	1.26169	1.28966	1.23482	1.36017	0.180532	13	0.0500705
15.4098	1.4906	1.24991	1.56419	1.46773	1.23645	1.6617	1.16202	1.12917	1.38807	1.26006	1.32694	1.26381	1.23003															15.4098	1.48149	1.20907	1.58774	1.51363	1.27809	1.67178	1.16353	1.1522	1.44347	1.30146	1.26997	1.23958	1.24034	1.35018	0.169502	13	0.0470114
15.7377	1.46847	1.24759	1.44936	1.46756	1.2282	1.56591	1.18394	1.14172	1.36631	1.29673	1.34125	1.16571	1.22972															15.7377	1.4595	1.20683	1.47118	1.51345	1.26956	1.57541	1.18548	1.165	1.42084	1.33933	1.28367	1.14337	1.24003	1.32874	0.144599	13	0.0401045
16.0656	1.43341	1.26615	1.36327	1.44073	1.22116	1.44702	1.16064	1.14139	1.3606	1.27334	1.33106	1.21232	1.22704															16.0656	1.42465	1.22478	1.3838	1.48578	1.26228	1.4558	1.16215	1.16466	1.4149	1.31517	1.27392	1.18908	1.23732	1.30725	0.113802	13	0.031563
16.3934	1.38715	1.2729	1.2758	1.42063	1.19147	1.3396	1.16066	1.11499	1.36926	1.25664	1.35391	1.25965	1.22452															16.3934	1.37867	1.23131	1.29502	1.46505	1.23159	1.34773	1.16218	1.13772	1.42391	1.29792	1.29578	1.23551	1.23478	1.28747	0.0967001	13	0.0268198
16.7213	1.44357	1.24391	1.21948	1.37343	1.1972	1.27975	1.16473	1.13412	1.37637	1.30345	1.38383	1.16208	1.23274															16.7213	1.43475	1.20326	1.23784	1.41637	1.23751	1.28751	1.16625	1.15724	1.4313	1.34627	1.32442	1.13981	1.24307	1.27889	0.104219	13	0.0289051
17.0492	1.40651	1.23146	1.20197	1.38761	1.22194	1.21766	1.17836	1.14294	1.36933	1.25626	1.37121	0.990367	1.23707															17.0492	1.39791	1.19122	1.22007	1.431	1.26308	1.22505	1.17989	1.16625	1.42398	1.29753	1.31234	0.971384	1.24744	1.25593	0.124266	13	0.0344652
17.377	1.35633	1.19702	1.20271	1.40175	1.24139	1.15	1.21896	1.12475	1.35376	1.24422	1.37878	1.06064	1.22187															17.377	1.34804	1.1579	1.22082	1.44559	1.28319	1.15697	1.22055	1.14768	1.40779	1.2851	1.31958	1.04031	1.23211	1.2512	0.113113	13	0.0313718
17.7049	1.24388	1.15749	1.18165	1.40817	1.24864	1.0948	1.19788	1.09625	1.40709	1.26855	1.377	1.11992	1.21308															17.7049	1.23627	1.11967	1.19945	1.4522	1.29069	1.10145	1.19944	1.1186	1.46325	1.31023	1.31788	1.09846	1.22325	1.24083	0.122631	13	0.0340117
18.0328	1.12343	1.10334	1.14394	1.41598	1.2602	1.07218	1.16261	1.08977	1.41253	1.26162	1.39807	1.11694	1.22988															18.0328	1.11657	1.06729	1.16117	1.46025	1.30264	1.07868	1.16413	1.11199	1.4689	1.30307	1.33804	1.09553	1.24018	1.22373	0.140029	13	0.0388369
TRPV1															Average (first 3 min)													TRPV1	Renormalized using the first 3 min																		Average (20 s interval, 2.62-2.95 and 10.8-11.1)
Time	TRPV1wISH_UP_X5.11.16slip5_cell3	TRPV1wISH_UpDOWN_X5.11.16slip6_cell1	TRPV1wISH_UP_X5.11.16slip6_cell2	TRPV1wISH_UP_X5.11.16slip6_cell3	TRPV1wISH_UP_X5.11.16slip6_cell6	TRPV1wISH_UP_X5.24.16slp1_cell1	TRPV1wISH_UP_X5.24.16slp1_cell2	TRPV1wISH_UP_X5.24.16slp2_cell1	TRPV1wISH_UP_X5.24.16slp2_cell2	TRPV1wISH_UP_X5.24.16slp4_cell2	TRPV1wISH_UP_X5.24.16slp5_cell1	TRPV1wISH_UP_X5.24.16slp6_cell1	TRPV1wISH_UP_X5.24.16slp6_cell2		Akt.PHwISH.TRPV1_UP_X5.11.16slip4_cell5	Akt.PHwISH.TRPV1_UP_X5.11.16slip4_cell6	Akt.PHwISH.TRPV1_UP_X5.11.16slip6_cell2	Akt.PHwISH.TRPV1_UP_X5.11.16slip6_cell4	Akt.PHwISH.TRPV1_UP_X5.11.16slip6_cell5	Akt.PHwISH.TRPV1_UP_X5.11.16slip6_cell7	Akt.PHwISH.TRPV1_UP_X5.24.16slp1_cell4	Akt.PHwISH.TRPV1_UP_X5.24.16slp3_cell1	Akt.PHwISH.TRPV1_UP_X5.24.16slp3_cell2	Akt.PHwISH.TRPV1_UP_X5.24.16slp3_cell3	Akt.PHwISH.TRPV1_UP_X5.24.16slp5_cell1	Akt.PHwISH.TRPV1_UP_X5.24.16slp5_cell3	Akt.PHwISH.TRPV1_UP_X5.24.16slp6_cell3	Time	Akt.PHwISH.TRPV1_UP_X5.11.16slip4_cell5	Akt.PHwISH.TRPV1_UP_X5.11.16slip4_cell6	Akt.PHwISH.TRPV1_UP_X5.11.16slip6_cell2	Akt.PHwISH.TRPV1_UP_X5.11.16slip6_cell4	Akt.PHwISH.TRPV1_UP_X5.11.16slip6_cell5	Akt.PHwISH.TRPV1_UP_X5.11.16slip6_cell7	Akt.PHwISH.TRPV1_UP_X5.24.16slp1_cell4	Akt.PHwISH.TRPV1_UP_X5.24.16slp3_cell1	Akt.PHwISH.TRPV1_UP_X5.24.16slp3_cell2	Akt.PHwISH.TRPV1_UP_X5.24.16slp3_cell3	Akt.PHwISH.TRPV1_UP_X5.24.16slp5_cell1	Akt.PHwISH.TRPV1_UP_X5.24.16slp5_cell3	Akt.PHwISH.TRPV1_UP_X5.24.16slp6_cell3	Average	SD	number	SEM		Akt.PHwISH.TRPV1_UP_X5.11.16slip4_cell5	Akt.PHwISH.TRPV1_UP_X5.11.16slip4_cell6	Akt.PHwISH.TRPV1_UP_X5.11.16slip6_cell2
0.327869	1.06666	1.02527	1.14946	1.19336	1.00007	1.05188	1.0256	0.967246	1.04818	1.26287	1.01804	1.12567	1.12242		1.04184	1.08115	1.24048	1.19963	0.965243	1.00235	1.05215	0.935546	1.11561	1.23846	0.968565	1.0148	1.18041	0.327869	1.02382	0.948313	0.926622	0.99477	1.03608	1.04941	0.974763	1.03388	0.939553	1.01956	1.05108	1.10925	0.950873	1.00446	0.0539406	13	0.0149604
0.655738	1.01494	1.02655	1.18561	1.16683	0.974615	1.02419	1.00757	0.971935	1.09667	1.23309	1.01296	1.09365	1.13409															0.655738	0.974178	0.949496	0.955766	0.972662	1.00971	1.02179	0.957628	1.0389	0.983025	0.99552	1.04583	1.0777	0.960763	0.995612	0.0403459	13	0.0111899
0.983607	0.994128	1.04853	1.22412	1.1405	0.995113	0.991034	1.02826	0.979352	1.11981	1.21478	0.972273	1.02634	1.14274															0.983607	0.954204	0.969827	0.986812	0.950713	1.03095	0.988711	0.97729	1.04682	1.00377	0.980734	1.00383	1.01138	0.968088	0.99024	0.028451	13	0.00789087
1.31148	1.03004	1.07505	1.17501	1.17123	0.961123	0.978352	1.03596	0.963001	1.09502	1.19753	1.01545	0.985294	1.14772															1.31148	0.988672	0.994362	0.947223	0.976324	0.995732	0.976058	0.984611	1.02935	0.981546	0.966813	1.04841	0.970925	0.972304	0.987102	0.0265052	13	0.00735123
1.63934	1.0364	1.09079	1.21331	1.17658	0.953593	0.985874	1.05081	0.905668	1.10323	1.29991	0.9775	0.956452	1.19829															1.63934	0.994783	1.00892	0.978095	0.98079	0.987931	0.983563	0.998723	0.968063	0.9889	1.04947	1.00923	0.942503	1.01515	0.992777	0.0256669	13	0.00711871		0.991727	1.00164	0.962659
1.96721	0.982035	1.09312	1.23372	1.23472	0.961185	0.977894	1.06903	0.874975	1.12245	1.25977	0.963709	0.971553	1.18589															1.96721	0.942597	1.01107	0.99455	1.02925	0.995796	0.975601	1.01605	0.935256	1.00613	1.01706	0.994987	0.957384	1.00464	0.990798	0.029518	13	0.00818683
2.29508	1.05986	1.09709	1.27666	1.19916	0.936313	0.997961	1.0992	0.911871	1.13106	1.2238	0.924638	0.979321	1.18638															2.29508	1.0173	1.01475	1.02917	0.999611	0.970029	0.995622	1.04471	0.974694	1.01385	0.988017	0.954647	0.965038	1.00506	0.997884	0.0266251	13	0.00738448
2.62295	1.07198	1.14034	1.33928	1.24676	0.941085	1.00304	1.07314	0.919922	1.15611	1.23203	0.911776	1.01649	1.26126															2.62295	1.02893	1.05474	1.07964	1.03928	0.974972	1.00068	1.01995	0.983299	1.03631	0.99466	0.941368	1.00166	1.0685	1.01723	0.0394158	13	0.010932
2.95082	1.12047	1.13359	1.36718	1.26755	0.964097	1.01095	1.0798	0.925946	1.16797	1.22241	0.920744	0.97842	1.24492															2.95082	1.07547	1.04851	1.10214	1.05662	0.998813	1.00858	1.02628	0.989739	1.04694	0.9869	0.950627	0.96415	1.05465	1.0238	0.0449797	13	0.0124751
3.27869	1.14889	1.13383	1.39507	1.28989	0.935485	1.04325	1.14409	0.897735	1.09483	1.23208	0.858114	1.02674	1.25881															3.27869	1.10275	1.04873	1.12462	1.07524	0.96917	1.0408	1.08739	0.959584	0.981376	0.994707	0.885965	1.01176	1.06642	1.02681	0.0674507	13	0.0187075
3.60656	1.18784	1.14001	1.38401	1.30214	0.902506	1.01596	1.11822	0.917731	1.16233	1.24561	0.871742	1.01256	1.24728															3.60656	1.14014	1.05445	1.11571	1.08545	0.935004	1.01358	1.0628	0.980958	1.04188	1.00562	0.900035	0.99779	1.05665	1.03	0.0678828	13	0.0188273
3.93443	1.19209	1.13492	1.39672	1.31281	0.89227	1.04977	1.13644	0.920773	1.21124	1.2007	0.878435	0.967904	1.29833															3.93443	1.14421	1.04973	1.12595	1.09435	0.924399	1.04731	1.08011	0.98421	1.08572	0.969371	0.906945	0.953788	1.0999	1.03585	0.0790641	13	0.0219284
4.2623	1.17241	1.14746	1.4283	1.3321	0.897126	1.06591	1.14857	0.938511	1.2217	1.29195	0.890297	1.00578	1.28072															4.2623	1.12532	1.06134	1.15141	1.11043	0.92943	1.06341	1.09164	1.00317	1.0951	1.04304	0.919192	0.991111	1.08498	1.05151	0.0720165	13	0.0199738
4.59016	1.14408	1.15941	1.51053	1.32979	0.968531	1.07819	1.1766	0.949016	1.18612	1.25199	0.912081	0.982717	1.32521															4.59016	1.09813	1.07239	1.2177	1.1085	1.00341	1.07566	1.11828	1.0144	1.06321	1.01078	0.941683	0.968384	1.12267	1.06271	0.0743927	13	0.0206328
4.91803	1.16793	1.11777	1.48315	1.35457	0.941438	1.09609	1.18321	0.929891	1.28247	1.34873	0.91141	0.977236	1.30989															4.91803	1.12103	1.03387	1.19562	1.12915	0.975338	1.09352	1.12457	0.993956	1.14957	1.08888	0.94099	0.962984	1.10969	1.07071	0.0805279	13	0.0223344
5.2459	1.14505	1.13407	1.48894	1.30964	0.939982	1.09513	1.17496	0.932449	1.23401	1.31508	0.909031	0.987763	1.28947															5.2459	1.09906	1.04895	1.20029	1.0917	0.97383	1.09256	1.11672	0.99669	1.10613	1.06171	0.938534	0.973357	1.09239	1.06092	0.0727306	13	0.0201718
5.57377	1.19144	1.16837	1.45894	1.33311	0.935357	1.10415	1.18636	0.965265	1.2618	1.33293	0.954777	1.0323	1.28952															5.57377	1.1436	1.08068	1.17611	1.11127	0.969037	1.10156	1.12756	1.03177	1.13104	1.07612	0.985765	1.01724	1.09244	1.08032	0.0627275	13	0.0173975
5.90164	1.21835	1.19219	1.47844	1.31513	0.878966	1.11192	1.18822	0.963728	1.28146	1.26903	0.957192	1.0571	1.29983															5.90164	1.16942	1.1027	1.19183	1.09628	0.910616	1.10932	1.12933	1.03012	1.14867	1.02454	0.988258	1.04169	1.10117	1.0803	0.0784629	13	0.0217617
6.22951	1.21392	1.22846	1.51167	1.34737	0.895125	1.11623	1.19021	1.02317	1.23803	1.22318	0.96553	1.0752	1.34666															6.22951	1.16517	1.13625	1.21861	1.12315	0.927357	1.11362	1.13122	1.09366	1.10973	0.987519	0.996866	1.05952	1.14084	1.09258	0.0801798	13	0.0222379
6.55738	1.21277	1.17671	1.55741	1.33419	0.92781	1.12386	1.21365	1.01098	1.20515	1.29683	0.983589	1.07735	1.32909															6.55738	1.16406	1.08838	1.25549	1.11217	0.961219	1.12122	1.15349	1.08063	1.08026	1.04697	1.01551	1.06164	1.12595	1.09746	0.0729798	13	0.0202409
6.88525	1.19143	1.22369	1.55186	1.2864	0.970236	1.1383	1.20279	1.06811	1.2554	1.29964	0.937432	1.1245	1.34681															6.88525	1.14358	1.13184	1.25102	1.07233	1.00517	1.13563	1.14318	1.14169	1.12531	1.04925	0.967857	1.1081	1.14097	1.10892	0.0717272	13	0.0198935
7.21311	1.16007	1.26034	1.551	1.32774	0.979822	1.13559	1.18269	1.07914	1.27101	1.29299	0.997104	1.0778	1.30205															7.21311	1.11348	1.16574	1.25032	1.10679	1.0151	1.13293	1.12407	1.15349	1.1393	1.04388	1.02946	1.06208	1.10305	1.11075	0.06357	13	0.0176312
7.54098	1.20006	1.27638	1.58229	1.32743	1.03579	1.1516	1.16894	1.09469	1.24838	1.32248	0.998444	1.06259	1.30724															7.54098	1.15187	1.18058	1.27555	1.10653	1.07309	1.1489	1.111	1.17011	1.11901	1.06769	1.03085	1.0471	1.10745	1.12229	0.065051	13	0.0180419
7.86885	1.1922	1.29019	1.5699	1.34171	0.998599	1.16285	1.18187	1.11203	1.32519	1.35461	1.00105	1.05417	1.26829															7.86885	1.14432	1.19335	1.26556	1.11843	1.03456	1.16012	1.12329	1.18864	1.18786	1.09363	1.03354	1.0388	1.07445	1.12743	0.0716011	13	0.0198586
8.19672	1.2285	1.26085	1.6271	1.32332	0.996411	1.16536	1.18648	1.0687	1.27543	1.37199	1.02004	1.13283	1.27483															8.19672	1.17916	1.16622	1.31167	1.1031	1.03229	1.16262	1.12767	1.14232	1.14326	1.10766	1.05315	1.11631	1.07999	1.13273	0.0691596	13	0.0191814
8.52459	1.18271	1.26872	1.62797	1.36046	1.02128	1.20023	1.22895	1.0821	1.25731	1.3799	1.00239	1.11732	1.28276															8.52459	1.13521	1.1735	1.31237	1.13407	1.05806	1.19742	1.16804	1.15666	1.12702	1.11404	1.03493	1.10103	1.08671	1.13839	0.069626	13	0.0193108
8.85246	1.20453	1.23938	1.73119	1.36101	1.02876	1.20132	1.23111	1.08027	1.28436	1.34691	1.02437	1.06782	1.27597															8.85246	1.15616	1.14635	1.39558	1.13452	1.06581	1.1985	1.17009	1.15469	1.15126	1.08741	1.05762	1.05225	1.08095	1.1424	0.0896712	13	0.0248703
9.18033	1.21034	1.23179	1.70362	1.371	0.996028	1.23856	1.25681	1.08432	1.3075	1.35403	1.01366	1.12486	1.3215															9.18033	1.16173	1.13933	1.37336	1.14286	1.03189	1.23566	1.19451	1.15903	1.172	1.09316	1.04656	1.10845	1.11952	1.15216	0.086867	13	0.0240926
9.5082	1.26439	1.2549	1.71574	1.31625	1.00156	1.24543	1.23836	1.0681	1.26422	1.30723	1.0227	1.12109	1.35453															9.5082	1.21361	1.16071	1.38313	1.09721	1.03762	1.24251	1.17698	1.14169	1.13321	1.05538	1.05589	1.10474	1.14751	1.15001	0.0928371	13	0.0257484
9.83607	1.27463	1.25208	1.78731	1.33374	0.994737	1.25597	1.22596	1.09821	1.33878	1.34777	1.03815	1.17579	1.37409															9.83607	1.22344	1.1581	1.44082	1.11179	1.03056	1.25302	1.1652	1.17387	1.20005	1.08811	1.07184	1.15864	1.16408	1.17227	0.101425	13	0.0281303
10.1639	1.22411	1.20999	1.74276	1.36188	1.00435	1.25817	1.23161	1.14258	1.45673	1.27817	1.03279	1.1986	1.34071															10.1639	1.17495	1.11917	1.4049	1.13525	1.04052	1.25522	1.17056	1.2213	1.30577	1.03191	1.0663	1.18112	1.1358	1.17252	0.106113	13	0.0294306
10.4918	1.29958	1.20232	1.76988	1.39908	0.976729	1.26195	1.25322	1.21119	1.43637	1.39759	1.01735	1.22303	1.3766															10.4918	1.24739	1.11208	1.42677	1.16626	1.0119	1.25899	1.19111	1.29463	1.28752	1.12833	1.05037	1.2052	1.16621	1.1959	0.110519	13	0.0306525
10.8197	1.29216	1.22967	1.80346	1.3967	1.00963	1.27554	1.26141	1.23502	1.45648	1.37639	1.07059	1.24989	1.41015															10.8197	1.24027	1.13737	1.45384	1.16428	1.04599	1.27255	1.19889	1.32011	1.30554	1.11121	1.10533	1.23166	1.19462	1.21397	0.108452	13	0.0300791
11.1475	1.30594	1.23325	1.79464	1.42387	1.06748	1.22304	1.21884	1.17854	1.4579	1.37559	1.08623	1.29802	1.39644															11.1475	1.2535	1.14069	1.44673	1.18692	1.10592	1.22017	1.15843	1.25974	1.30682	1.11057	1.12149	1.27909	1.18301	1.21331	0.09652	13	0.0267698		1.24688	1.13903	1.45028
11.4754	1.30497	1.2189	1.89204	1.42853	1.05512	1.25211	1.27874	1.17265	1.42146	1.32675	1.07443	1.2561	1.39637															11.4754	1.25256	1.12741	1.52524	1.19081	1.09312	1.24917	1.21536	1.25344	1.27415	1.07114	1.1093	1.23778	1.18296	1.21403	0.115586	13	0.0320579
11.8033	1.25934	1.25105	1.9055	1.48768	1.05106	1.23479	1.26582	1.17771	1.44968	1.37698	1.09949	1.27285	1.38442															11.8033	1.20876	1.15715	1.5361	1.24012	1.0889	1.2319	1.20308	1.25885	1.29945	1.11168	1.13517	1.25428	1.17283	1.22295	0.112564	13	0.0312197
12.1311	1.23826	1.24283	1.85201	1.46967	1.01943	1.2665	1.32688	1.18366	1.45866	1.30378	1.09173	1.33064	1.36636															12.1311	1.18853	1.14954	1.49298	1.2251	1.05614	1.26353	1.26111	1.26521	1.3075	1.05259	1.12716	1.31123	1.15753	1.21986	0.11885	13	0.032963
12.459	1.18477	1.22055	1.81858	1.42956	1.03123	1.25899	1.35336	1.21619	1.56457	1.32686	1.09127	1.27348	1.4176															12.459	1.13719	1.12893	1.46603	1.19167	1.06836	1.25603	1.28628	1.29998	1.40243	1.07123	1.12669	1.25491	1.20094	1.22236	0.121517	13	0.0337028
12.7869	1.18373	1.20993	1.79663	1.39961	0.981573	1.25853	1.33673	1.19401	1.51964	1.38264	1.03657	1.28975	1.39385															12.7869	1.13619	1.11911	1.44834	1.1667	1.01692	1.25558	1.27047	1.27627	1.36216	1.11625	1.07021	1.27094	1.18081	1.20692	0.121009	13	0.0335617
13.1148	1.1587	1.20202	1.72852	1.45084	1.02035	1.26782	1.31111	1.20096	1.52341	1.35019	1.05114	1.29467	1.42945															13.1148	1.11216	1.1118	1.39343	1.20941	1.05709	1.26484	1.24613	1.2837	1.36554	1.09006	1.08525	1.27578	1.21098	1.20817	0.109702	13	0.030426
13.4426	1.15476	1.16194	1.73724	1.43104	1.01429	1.25987	1.30559	1.19325	1.59238	1.28134	1.0443	1.27164	1.44892															13.4426	1.10839	1.07473	1.40046	1.1929	1.05081	1.25691	1.24087	1.27546	1.42736	1.03447	1.07819	1.2531	1.22747	1.20163	0.127362	13	0.0353238
13.7705	1.12641	1.15509	1.72735	1.42668	1.01604	1.26518	1.29978	1.12707	1.55377	1.28041	1.02021	1.23852	1.4382															13.7705	1.08117	1.06839	1.39248	1.18927	1.05263	1.26221	1.23535	1.20471	1.39275	1.03372	1.05332	1.22045	1.21839	1.18499	0.122342	13	0.0339317
14.0984	1.0839	1.13299	1.59791	1.42538	0.996585	1.29634	1.29119	1.11478	1.60136	1.33936	1.03505	1.26865	1.3982															14.0984	1.04037	1.04795	1.28814	1.18819	1.03247	1.2933	1.2272	1.19158	1.43541	1.08132	1.06864	1.25015	1.1845	1.17917	0.12178	13	0.0337757
14.4262	1.10101	1.14162	1.58139	1.45645	0.980208	1.31053	1.29803	1.11313	1.67236	1.21648	1.03766	1.27967	1.41187															14.4262	1.05679	1.05593	1.27482	1.21408	1.0155	1.30745	1.2337	1.18982	1.49905	0.982112	1.07134	1.261	1.19609	1.18136	0.143343	13	0.0397563
14.7541	1.08767	1.10684	1.59999	1.53773	0.969309	1.35648	1.29477	1.12577	1.71667	1.35652	1.03398	1.30673	1.42007															14.7541	1.04399	1.02376	1.28981	1.28183	1.00421	1.3533	1.2306	1.20333	1.53877	1.09517	1.06754	1.28768	1.20303	1.20177	0.153814	13	0.0426604
15.082	1.11146	1.11945	1.60189	1.54513	0.981021	1.39265	1.31539	1.16492	1.70032	1.39861	1.04034	1.3117	1.43694															15.082	1.06682	1.03543	1.29134	1.28801	1.01635	1.38939	1.25019	1.24518	1.52412	1.12915	1.0741	1.29257	1.21732	1.21692	0.148922	13	0.0413037
15.4098	1.06869	1.11884	1.60815	1.57171	0.997882	1.41733	1.31858	1.20001	1.74923	1.23927	1.01789	1.25942	1.44714															15.4098	1.02577	1.03486	1.2964	1.31016	1.03381	1.41401	1.25322	1.28269	1.56796	1.00051	1.05093	1.24105	1.22596	1.21056	0.173317	13	0.0480695
15.7377	1.01263	1.09412	1.51855	1.58787	0.952075	1.41351	1.33868	1.19991	1.73471	1.22932	1.0585	1.25842	1.46097															15.7377	0.971966	1.01199	1.22417	1.32363	0.986358	1.4102	1.27233	1.28257	1.55494	0.992477	1.09285	1.24007	1.23768	1.20009	0.179965	13	0.0499133
16.0656	1.02014	1.11229	1.50067	1.59643	0.939834	1.37719	1.32162	1.20036	1.68379	1.22374	1.03399	1.2333	1.46274															16.0656	0.979167	1.0288	1.20975	1.33077	0.973676	1.37396	1.25611	1.28306	1.5093	0.987969	1.06755	1.21531	1.23918	1.18882	0.169585	13	0.0470344
16.3934	1.03007	1.13719	1.51076	1.59632	0.901594	1.35037	1.31402	1.26316	1.78898	1.16476	1.03301	1.19634	1.52331															16.3934	0.988699	1.05183	1.21788	1.33068	0.934059	1.3472	1.24889	1.35018	1.60359	0.940351	1.06653	1.1789	1.29049	1.1961	0.19534	13	0.0541775
16.7213	0.988457	1.15263	1.46689	1.61826	0.889583	1.37129	1.36461	1.24081	1.76544	1.1963	1.02932	1.2194	1.50083															16.7213	0.948761	1.06611	1.18252	1.34897	0.921615	1.36808	1.29697	1.32629	1.58249	0.965818	1.06273	1.20162	1.27145	1.19565	0.19568	13	0.0542719
17.0492	0.968155	1.14737	1.44392	1.53355	0.891477	1.3851	1.37438	1.23304	1.70625	1.1618	1.06179	1.24335	1.50765															17.0492	0.929274	1.06125	1.164	1.27835	0.923578	1.38185	1.30625	1.31799	1.52943	0.937963	1.09625	1.22522	1.27722	1.18682	0.188627	13	0.0523156
17.377	0.968009	1.12861	1.45217	1.51246	0.871419	1.32551	1.36028	1.19263	1.65239	1.20425	1.06466	1.28396	1.4816															17.377	0.929134	1.0439	1.17065	1.26077	0.902798	1.3224	1.29285	1.2748	1.48115	0.972236	1.09922	1.26524	1.25516	1.17464	0.173165	13	0.0480273
17.7049	0.987892	1.12758	1.44634	1.52397	0.879558	1.333	1.34225	1.15566	1.69362	1.20677	1.07173	1.31569	1.4703															17.7049	0.948218	1.04295	1.16595	1.27037	0.91123	1.32987	1.27572	1.23527	1.51811	0.974273	1.10651	1.2965	1.24558	1.1785	0.175042	13	0.0485478
18.0328	0.950559	1.14018	1.45566	1.56412	0.926204	1.33531	1.3545	1.17182	1.70949	1.10786	1.08025	1.31382	1.44075															18.0328	0.912384	1.0546	1.17346	1.30383	0.959555	1.33218	1.28736	1.25255	1.53233	0.894415	1.11531	1.29466	1.22055	1.17948	0.186175	13	0.0516358
[truncated: 24 more columns]
