# Supplementary material for: Genetic code expansion, click chemistry, and light-activated PI3K reveal details of membrane protein trafficking downstream of receptor tyrosine kinases
Source: eLife. 2024 Aug 20;12:RP91012. doi: 10.7554/eLife.91012 (PMC11335347; doi:10.7554/eLife.91012)
Supplement: Figure 3—figure supplement 1—source data 1. [file elife-91012-fig3-figsupp1-data1.xlsx]

## Sheet: Sheet1
Time (sec)	TRPV1_WT_Cell 13	TRPV1_488TAG_Cell 15
0	-4.10112e-11	-2.99375e-10
0.025	-5.40235e-11	-3.70986e-10
0.05	-5.28602e-11	-3.64602e-10
0.075	-5.1719e-11	-3.70073e-10
0.1	-5.33896e-11	-3.70132e-10
0.125	-5.23371e-11	-3.68109e-10
0.15	-5.34474e-11	-3.63811e-10
0.175	-5.47624e-11	-3.67022e-10
0.2	-5.74315e-11	-3.70792e-10
0.225	-5.24305e-11	-3.70909e-10
0.25	-5.30174e-11	-3.67785e-10
0.275	-5.20487e-11	-3.68007e-10
0.3	-6.20143e-11	-3.67633e-10
0.325	-5.29009e-11	-3.63754e-10
0.35	-5.32311e-11	-3.6594e-10
0.375	-5.40311e-11	-3.57438e-10
0.4	-6.38613e-11	-3.57654e-10
0.425	-5.67158e-11	-3.6287e-10
0.45	-5.81e-11	-3.62109e-10
0.475	-5.72707e-11	-3.58212e-10
0.5	-6.01677e-11	-3.62657e-10
0.525	-5.49655e-11	-3.59792e-10
0.55	-5.38928e-11	-3.58085e-10
0.575	-5.2698e-11	-3.6522e-10
0.6	-5.62386e-11	-3.66269e-10
0.625	-5.49923e-11	-3.63147e-10
0.65	-5.58024e-11	-3.61053e-10
0.675	-5.57745e-11	-3.69805e-10
0.7	-5.47369e-11	-3.66453e-10
0.725	-5.37599e-11	-3.70869e-10
0.75	-5.27382e-11	-3.67166e-10
0.775	-5.54015e-11	-3.76986e-10
0.8	-5.45385e-11	-3.74342e-10
0.825	-5.45428e-11	-3.7238e-10
0.85	-5.40516e-11	-3.68371e-10
0.875	-5.47972e-11	-3.77469e-10
0.9	-5.65185e-11	-3.74553e-10
0.925	-5.4371e-11	-3.75862e-10
0.95	-5.45095e-11	-3.69082e-10
0.975	-5.30268e-11	-3.7469e-10
1	-5.36802e-11	-3.74328e-10
1.025	-5.35564e-11	-3.74467e-10
1.05	-5.40525e-11	-3.71007e-10
1.075	-5.25293e-11	-3.74765e-10
1.1	-5.3138e-11	-3.77249e-10
1.125	-5.14686e-11	-3.7613e-10
1.15	-5.23491e-11	-3.75137e-10
1.175	-5.13405e-11	-3.73623e-10
1.2	-5.23357e-11	-3.75414e-10
1.225	-5.35122e-11	-3.7534e-10
1.25	-5.3092e-11	-3.76922e-10
1.275	-5.32096e-11	-3.7765e-10
1.3	-4.96907e-11	-3.743e-10
1.325	-5.05937e-11	-3.71074e-10
1.35	-5.20644e-11	-3.73209e-10
1.375	-5.34036e-11	-3.77079e-10
1.4	-4.75755e-11	-3.71674e-10
1.425	-4.73301e-11	-3.73573e-10
1.45	-4.97956e-11	-3.751e-10
1.475	-5.11032e-11	-3.82425e-10
1.5	-4.73771e-11	-3.77819e-10
1.525	-4.56672e-11	-3.77158e-10
1.55	-5.0041e-11	-3.7694e-10
1.575	-4.9076e-11	-3.78934e-10
1.6	-4.87504e-11	-3.80361e-10
1.625	-4.56e-11	-3.73911e-10
1.65	-5.20306e-11	-3.69824e-10
1.675	-4.94918e-11	-3.7732e-10
1.7	-5.06297e-11	-3.78588e-10
1.725	-4.66264e-11	-3.75105e-10
1.75	-4.75516e-11	-3.76846e-10
1.775	-4.73193e-11	-3.76933e-10
1.8	-4.8181e-11	-3.81079e-10
1.825	-4.83043e-11	-3.79104e-10
1.85	-4.7288e-11	-3.72899e-10
1.875	-4.79294e-11	-3.735e-10
1.9	-5.00904e-11	-3.74401e-10
1.925	-4.99964e-11	-3.75613e-10
1.95	-5.03622e-11	-3.71938e-10
1.975	-4.95123e-11	-3.73064e-10
2	-4.87428e-11	-3.72865e-10
2.025	-5.18098e-11	-3.77505e-10
2.05	-5.27671e-11	-3.75835e-10
2.075	-4.89443e-11	-3.72146e-10
2.1	-4.95967e-11	-3.75174e-10
2.125	-5.1642e-11	-3.7524e-10
2.15	-5.68985e-11	-3.73488e-10
2.175	-4.92432e-11	-3.73796e-10
2.2	-5.02993e-11	-3.73537e-10
2.225	-5.04369e-11	-3.70193e-10
2.25	-6.05059e-11	-3.6854e-10
2.275	-5.21762e-11	-3.68369e-10
2.3	-4.96154e-11	-3.7131e-10
2.325	-4.94532e-11	-3.74511e-10
2.35	-5.54119e-11	-3.69929e-10
2.375	-4.9613e-11	-3.69379e-10
2.4	-4.91781e-11	-3.75433e-10
2.425	-5.02221e-11	-3.79397e-10
2.45	-5.18091e-11	-3.75195e-10
2.475	-5.00653e-11	-3.73634e-10
2.5	-4.65708e-11	-3.76004e-10
2.525	-4.76964e-11	-3.79219e-10
2.55	-4.74174e-11	-3.78052e-10
2.575	-4.75343e-11	-3.74683e-10
2.6	-4.58433e-11	-3.71167e-10
2.625	-4.57494e-11	-3.74251e-10
2.65	-4.61379e-11	-3.72303e-10
2.675	-4.64619e-11	-3.74262e-10
2.7	-4.5018e-11	-3.72603e-10
2.725	-4.57404e-11	-3.78692e-10
2.75	-4.49777e-11	-3.74392e-10
2.775	-4.59567e-11	-3.733e-10
2.8	-4.57067e-11	-3.64203e-10
2.825	-4.64699e-11	-3.75047e-10
2.85	-4.62758e-11	-3.7486e-10
2.875	-4.61636e-11	-3.75747e-10
2.9	-4.55724e-11	-3.68886e-10
2.925	-4.46373e-11	-3.71747e-10
2.95	-4.42633e-11	-3.78532e-10
2.975	-4.62185e-11	-3.73813e-10
3	-4.70787e-11	-3.74184e-10
3.025	-4.83965e-11	-3.7371e-10
3.05	-4.61621e-11	-3.79443e-10
3.075	-4.53062e-11	-3.77746e-10
3.1	-4.61402e-11	-3.75815e-10
3.125	-4.55737e-11	-3.69759e-10
3.15	-4.36412e-11	-3.76906e-10
3.175	-4.22131e-11	-3.75357e-10
3.2	-4.27883e-11	-3.78965e-10
3.225	-4.49814e-11	-3.78415e-10
3.25	-3.88141e-11	-3.77854e-10
3.275	-3.84681e-11	-3.74164e-10
3.3	-4.28029e-11	-3.71405e-10
3.325	-4.47454e-11	-3.69906e-10
3.35	-4.19716e-11	-3.72689e-10
3.375	-4.06803e-11	-3.74911e-10
3.4	-4.53097e-11	-3.73044e-10
3.425	-4.49165e-11	-3.81576e-10
3.45	-4.39816e-11	-3.82041e-10
3.475	-4.03085e-11	-3.76652e-10
3.5	-4.54646e-11	-3.73759e-10
3.525	-4.59964e-11	-3.75617e-10
3.55	-4.36371e-11	-3.80797e-10
3.575	-4.2426e-11	-3.76385e-10
3.6	-4.52478e-11	-3.7497e-10
3.625	-4.47701e-11	-3.74297e-10
3.65	-4.38673e-11	-3.85406e-10
3.675	-4.25129e-11	-3.77376e-10
3.7	-4.29037e-11	-3.76333e-10
3.725	-4.24799e-11	-3.75335e-10
3.75	-4.27739e-11	-3.87614e-10
3.775	-4.31455e-11	-3.76078e-10
3.8	-4.24318e-11	-3.77007e-10
3.825	-4.3806e-11	-3.76608e-10
3.85	-4.33004e-11	-3.80229e-10
3.875	-4.5464e-11	-3.74089e-10
3.9	-4.70596e-11	-3.76398e-10
3.925	-4.47057e-11	-3.73958e-10
3.95	-4.58117e-11	-3.76567e-10
3.975	-4.68361e-11	-3.74283e-10
4	-5.20887e-11	-3.72511e-10
4.025	-4.53019e-11	-3.73046e-10
4.05	-4.67159e-11	-3.75433e-10
4.075	-4.62344e-11	-3.74594e-10
4.1	-5.36921e-11	-3.71638e-10
4.125	-4.47721e-11	-3.72662e-10
4.15	-4.29397e-11	-3.72304e-10
4.175	-4.21959e-11	-3.67971e-10
4.2	-4.67529e-11	-3.67232e-10
4.225	-4.27713e-11	-3.69192e-10
4.25	-4.14212e-11	-3.72571e-10
4.275	-3.94162e-11	-3.72214e-10
4.3	-4.18075e-11	-3.72542e-10
4.325	-4.12856e-11	-3.72703e-10
4.35	-3.95494e-11	-3.69995e-10
4.375	-4.09192e-11	-3.73401e-10
4.4	-4.19218e-11	-3.7388e-10
4.425	-4.18792e-11	-3.79553e-10
4.45	-4.16229e-11	-3.76267e-10
4.475	-4.2369e-11	-3.73264e-10
4.5	-4.22922e-11	-3.7994e-10
4.525	-4.12776e-11	-3.8184e-10
4.55	-4.16483e-11	-3.82089e-10
4.575	-4.21092e-11	-3.7858e-10
4.6	-4.03301e-11	-3.76901e-10
4.625	-4.18161e-11	-3.71385e-10
4.65	-4.252e-11	-3.72665e-10
4.675	-4.07783e-11	-3.74207e-10
4.7	-4.10825e-11	-3.7491e-10
4.725	-4.16598e-11	-3.77296e-10
4.75	-4.02196e-11	-3.70058e-10
4.775	-4.23765e-11	-3.72149e-10
4.8	-4.34086e-11	-3.74205e-10
4.825	-4.39495e-11	-3.77873e-10
4.85	-4.16641e-11	-3.73271e-10
4.875	-4.10229e-11	-3.70173e-10
4.9	-4.17341e-11	-3.76909e-10
4.925	-4.40662e-11	-3.77146e-10
4.95	-4.32571e-11	-3.72761e-10
4.975	-4.22218e-11	-3.70256e-10
5	-3.57895e-11	-3.80001e-10
5.025	-4.0426e-11	-3.76123e-10
5.05	-4.16971e-11	-3.71289e-10
5.075	-4.3033e-11	-3.71157e-10
5.1	-3.42807e-11	-3.76415e-10
5.125	-3.9112e-11	-3.76595e-10
5.15	-4.36741e-11	-3.75626e-10
5.175	-4.20461e-11	-3.71049e-10
5.2	-3.89938e-11	-3.77633e-10
5.225	-3.59736e-11	-3.77623e-10
5.25	-4.38424e-11	-3.72023e-10
5.275	-4.42064e-11	-3.73143e-10
5.3	-4.48895e-11	-3.75728e-10
5.325	-4.12813e-11	-3.77931e-10
5.35	-4.46865e-11	-3.76003e-10
5.375	-4.33817e-11	-3.79382e-10
5.4	-4.44394e-11	-3.77852e-10
5.425	-4.253e-11	-3.7504e-10
5.45	-4.42286e-11	-3.75913e-10
5.475	-4.5352e-11	-3.79301e-10
5.5	-4.53566e-11	-3.79659e-10
5.525	-4.41554e-11	-3.8488e-10
5.55	-4.38898e-11	-3.77392e-10
5.575	-4.38892e-11	-3.77948e-10
5.6	-4.37492e-11	-3.87317e-10
5.625	-4.6758e-11	-3.81819e-10
5.65	-4.54042e-11	-3.82958e-10
5.675	-4.28994e-11	-3.83412e-10
5.7	-4.30154e-11	-3.84971e-10
5.725	-4.62146e-11	-3.75367e-10
5.75	-4.90868e-11	-3.7133e-10
5.775	-4.24797e-11	-3.70751e-10
5.8	-4.27432e-11	-3.76456e-10
5.825	-4.4118e-11	-3.6977e-10
5.85	-5.14177e-11	-3.69406e-10
5.875	-4.19393e-11	-3.74196e-10
5.9	-4.34456e-11	-3.73046e-10
5.925	-4.18976e-11	-3.79763e-10
5.95	-4.72952e-11	-3.73851e-10
5.975	-4.18648e-11	-3.75052e-10
6	-4.28226e-11	-3.73736e-10
6.025	-4.14327e-11	-3.74789e-10
6.05	-4.22829e-11	-3.69081e-10
6.075	-4.18356e-11	-3.79324e-10
6.1	-4.16004e-11	-3.74716e-10
6.125	-4.13677e-11	-3.76215e-10
6.15	-4.21615e-11	-3.70802e-10
6.175	-4.17815e-11	-3.74621e-10
6.2	-4.01966e-11	-3.7557e-10
6.225	-4.0627e-11	-3.75666e-10
6.25	-4.09304e-11	-3.71365e-10
6.275	-3.98467e-11	-3.7251e-10
6.3	-4.03428e-11	-3.72681e-10
6.325	-4.03356e-11	-3.77451e-10
6.35	-4.08405e-11	-3.82169e-10
6.375	-3.95057e-11	-3.81509e-10
6.4	-4.03979e-11	-3.7978e-10
6.425	-4.06577e-11	-3.78453e-10
6.45	-3.92943e-11	-3.73529e-10
6.475	-3.76535e-11	-3.74385e-10
6.5	-3.93032e-11	-3.75326e-10
6.525	-3.88255e-11	-3.75962e-10
6.55	-3.95309e-11	-3.71978e-10
6.575	-4.09469e-11	-3.71017e-10
6.6	-4.11915e-11	-3.69875e-10
6.625	-4.06649e-11	-3.72504e-10
6.65	-3.95014e-11	-3.77802e-10
6.675	-4.08463e-11	-3.80061e-10
6.7	-3.7591e-11	-3.81253e-10
6.725	-3.98962e-11	-3.80599e-10
6.75	-3.45554e-11	-3.80789e-10
6.775	-4.10122e-11	-3.77823e-10
6.8	-4.18335e-11	-3.78266e-10
6.825	-4.32681e-11	-3.74809e-10
6.85	-3.57612e-11	-3.80181e-10
6.875	-4.11009e-11	-3.81631e-10
6.9	-4.12335e-11	-3.81546e-10
6.925	-4.24048e-11	-3.78961e-10
6.95	-3.65676e-11	-3.76452e-10
6.975	-3.75893e-11	-3.72331e-10
7	-4.21404e-11	-3.73783e-10
7.025	-4.14702e-11	-3.75943e-10
7.05	-3.96721e-11	-3.75917e-10
7.075	-3.81576e-11	-3.71011e-10
7.1	-4.18546e-11	-3.72002e-10
7.125	-4.03831e-11	-3.68813e-10
7.15	-4.03919e-11	-3.73178e-10
7.175	-4.09277e-11	-3.83627e-10
7.2	-4.12886e-11	-3.79773e-10
7.225	-3.79374e-11	-3.74497e-10
7.25	-3.90633e-11	-3.72917e-10
7.275	-3.90814e-11	-3.82895e-10
7.3	-3.89434e-11	-3.80016e-10
7.325	-4.20803e-11	-3.79513e-10
7.35	-3.96879e-11	-3.68916e-10
7.375	-4.41671e-11	-3.77437e-10
7.4	-4.17297e-11	-3.79695e-10
7.425	-4.02962e-11	-3.77519e-10
7.45	-3.99191e-11	-3.72806e-10
7.475	-4.68635e-11	-3.77368e-10
7.5	-4.46367e-11	-3.77536e-10
7.525	-4.13378e-11	-3.79309e-10
7.55	-4.25681e-11	-3.80765e-10
7.575	-4.40025e-11	-3.78249e-10
7.6	-4.61336e-11	-3.72705e-10
7.625	-4.0842e-11	-3.75338e-10
7.65	-4.16628e-11	-3.74602e-10
7.675	-4.18562e-11	-3.72498e-10
7.7	-4.34274e-11	-3.77931e-10
7.725	-3.95498e-11	-3.75317e-10
7.75	-4.00874e-11	-3.75953e-10
7.775	-3.97786e-11	-3.78045e-10
7.8	-3.99279e-11	-3.7823e-10
7.825	-3.93335e-11	-3.75333e-10
7.85	-3.88428e-11	-3.74126e-10
7.875	-3.88005e-11	-3.79634e-10
7.9	-3.98494e-11	-3.74505e-10
7.925	-3.89655e-11	-3.79738e-10
7.95	-3.98911e-11	-3.73853e-10
7.975	-3.88297e-11	-3.81181e-10
8	-3.9654e-11	-3.77995e-10
8.025	-3.80201e-11	-3.80798e-10
8.05	-3.77392e-11	-3.76237e-10
8.075	-3.95515e-11	-3.83136e-10
8.1	-4.0877e-11	-3.78785e-10
8.125	-4.02619e-11	-3.7915e-10
8.15	-4.05011e-11	-3.81173e-10
8.175	-4.04108e-11	-3.84676e-10
8.2	-4.02858e-11	-3.81486e-10
8.225	-4.23287e-11	-3.80815e-10
8.25	-4.31246e-11	-3.80898e-10
8.275	-4.28057e-11	-3.80568e-10
8.3	-4.34609e-11	-3.81401e-10
8.325	-4.11659e-11	-3.77054e-10
8.35	-3.97046e-11	-3.75323e-10
8.375	-3.9123e-11	-3.74385e-10
8.4	-4.0044e-11	-3.77393e-10
8.425	-3.97982e-11	-3.75456e-10
8.45	-3.9455e-11	-3.75793e-10
8.475	-3.87393e-11	-3.76487e-10
8.5	-3.58261e-11	-3.75561e-10
8.525	-3.98135e-11	-3.76245e-10
8.55	-4.14653e-11	-3.7355e-10
8.575	-4.07198e-11	-3.767e-10
8.6	-3.43626e-11	-3.75948e-10
8.625	-4.10825e-11	-3.77476e-10
8.65	-4.01883e-11	-3.78156e-10
8.675	-4.25451e-11	-3.75022e-10
8.7	-3.36907e-11	-3.74948e-10
8.725	-3.93737e-11	-3.75533e-10
8.75	-4.04321e-11	-3.76401e-10
8.775	-4.15669e-11	-3.70589e-10
8.8	-3.49468e-11	-3.75353e-10
8.825	-3.6763e-11	-3.79044e-10
8.85	-3.89878e-11	-3.76696e-10
8.875	-3.99635e-11	-3.77468e-10
8.9	-3.83574e-11	-3.80638e-10
8.925	-3.79555e-11	-3.84598e-10
8.95	-4.06003e-11	-3.80201e-10
8.975	-4.10816e-11	-3.75473e-10
9	-3.89078e-11	-3.75743e-10
9.025	-3.81471e-11	-3.74757e-10
9.05	-4.14652e-11	-3.77849e-10
9.075	-4.21861e-11	-3.77481e-10
9.1	-4.10127e-11	-3.75771e-10
9.125	-4.11241e-11	-3.78474e-10
9.15	-4.09537e-11	-3.804e-10
9.175	-4.14406e-11	-3.75794e-10
9.2	-3.86331e-11	-3.70601e-10
9.225	-4.50438e-11	-3.79015e-10
9.25	-4.16329e-11	-3.79673e-10
9.275	-4.0687e-11	-3.8207e-10
9.3	-3.86256e-11	-3.72939e-10
9.325	-4.62324e-11	-3.76459e-10
9.35	-4.3672e-11	-3.79157e-10
9.375	-3.97969e-11	-3.75931e-10
9.4	-4.02201e-11	-3.71042e-10
9.425	-4.37989e-11	-3.7441e-10
9.45	-4.60575e-11	-3.76412e-10
9.475	-3.98052e-11	-3.74241e-10
9.5	-4.23405e-11	-3.75258e-10
9.525	-4.24083e-11	-3.75012e-10
9.55	-4.55791e-11	-3.78121e-10
9.575	-4.23187e-11	-3.74371e-10
9.6	-4.24527e-11	-3.74149e-10
9.625	-4.23822e-11	-3.74614e-10
9.65	-4.49351e-11	-3.72658e-10
9.675	-4.22754e-11	-3.71943e-10
9.7	-4.18631e-11	-3.74554e-10
9.725	-4.31128e-11	-3.7782e-10
9.75	-4.18621e-11	-3.71739e-10
9.775	-4.21137e-11	-3.70327e-10
9.8	-4.09722e-11	-3.71583e-10
9.825	-4.25578e-11	-3.73763e-10
9.85	-4.19417e-11	-3.65582e-10
9.875	-4.36631e-11	-3.67353e-10
9.9	-4.33829e-11	-3.67337e-10
9.925	-4.17588e-11	-3.73035e-10
9.95	-4.2485e-11	-3.69899e-10
9.975	-4.28725e-11	-3.66761e-10
10	-4.18583e-11	-3.63971e-10
10.025	-4.12159e-11	-3.72616e-10
10.05	-3.98713e-11	-3.7363e-10
10.075	-3.86575e-11	-3.66065e-10
10.1	-4.19627e-11	-3.67036e-10
10.125	-4.37106e-11	-3.71266e-10
10.15	-3.98947e-11	-3.74402e-10
10.175	-4.07419e-11	-3.70446e-10
10.2	-3.72513e-11	-3.67066e-10
10.225	-3.53908e-11	-3.71533e-10
10.25	-3.8953e-11	-3.76259e-10
10.275	-4.08198e-11	-3.68671e-10
10.3	-4.03592e-11	-3.70387e-10
10.325	-4.09377e-11	-3.72483e-10
10.35	-3.97193e-11	-4.16175e-10
10.375	-3.9156e-11	-3.58682e-10
10.4	-3.88687e-11	-3.65323e-10
10.425	-3.86969e-11	-3.67123e-10
10.45	-4.16834e-11	-3.7341e-10
10.475	-4.04358e-11	-3.6923e-10
10.5	-4.00836e-11	-3.67678e-10
10.525	-3.88888e-11	-3.69878e-10
10.55	-3.69474e-11	-3.71662e-10
10.575	-3.84867e-11	-3.71197e-10
10.6	-3.95472e-11	-3.66497e-10
10.625	-3.93683e-11	-3.66398e-10
10.65	-4.15813e-11	-3.6638e-10
10.675	-4.03628e-11	-3.67406e-10
10.7	-4.08326e-11	-3.66015e-10
10.725	-4.03896e-11	-3.70342e-10
10.75	-3.97722e-11	-3.72632e-10
10.775	-4.11344e-11	-3.83261e-10
10.8	-4.4092e-11	-3.64642e-10
10.825	-4.34435e-11	-3.68248e-10
10.85	-4.55444e-11	-3.78922e-10
10.875	-5.20534e-11	-4.07361e-10
10.9	-5.52146e-11	-4.32358e-10
10.925	-5.9141e-11	-4.59751e-10
10.95	-6.84834e-11	-4.96214e-10
10.975	-8.02306e-11	-5.47236e-10
11	-9.19692e-11	-5.90512e-10
11.025	-1.08582e-10	-6.54977e-10
11.05	-1.1098e-10	-7.3423e-10
11.075	-1.31422e-10	-8.23712e-10
11.1	-1.56987e-10	-9.04971e-10
11.125	-1.80274e-10	-1.00254e-09
11.15	-2.08219e-10	-1.08173e-09
11.175	-2.29781e-10	-1.19244e-09
11.2	-2.52664e-10	-1.31358e-09
11.225	-2.76147e-10	-1.40598e-09
11.25	-2.98166e-10	-1.4927e-09
11.275	-3.32189e-10	-1.56591e-09
11.3	-3.49894e-10	-1.65381e-09
11.325	-4.22635e-10	-1.77919e-09
11.35	-4.60229e-10	-1.89881e-09
11.375	-5.11814e-10	-1.98017e-09
11.4	-5.37379e-10	-2.08256e-09
11.425	-5.58874e-10	-2.15186e-09
11.45	-5.88082e-10	-2.24718e-09
11.475	-6.26775e-10	-2.35341e-09
11.5	-6.70291e-10	-2.42314e-09
11.525	-7.15268e-10	-2.50233e-09
11.55	-7.5437e-10	-2.58962e-09
11.575	-8.1541e-10	-2.66431e-09
11.6	-8.69666e-10	-2.75617e-09
11.625	-9.22731e-10	-2.80942e-09
11.65	-9.71119e-10	-2.87958e-09
11.675	-1.0372e-09	-2.93636e-09
11.7	-1.0598e-09	-2.96625e-09
11.725	-1.1251e-09	-3.04313e-09
11.75	-1.18512e-09	-3.11199e-09
11.775	-1.25424e-09	-3.1659e-09
11.8	-1.30648e-09	-3.1684e-09
11.825	-1.36732e-09	-3.23666e-09
11.85	-1.42802e-09	-3.30072e-09
11.875	-1.4992e-09	-3.33792e-09
11.9	-1.56491e-09	-3.37934e-09
11.925	-1.63245e-09	-3.38934e-09
11.95	-1.62948e-09	-3.41709e-09
11.975	-1.69521e-09	-3.46976e-09
12	-1.77444e-09	-3.49548e-09
12.025	-1.87059e-09	-3.53891e-09
12.05	-1.91624e-09	-3.57818e-09
12.075	-1.98526e-09	-3.61198e-09
12.1	-2.05281e-09	-3.61152e-09
12.125	-2.11443e-09	-3.64354e-09
12.15	-2.15643e-09	-3.68252e-09
12.175	-2.20356e-09	-3.71984e-09
12.2	-2.28635e-09	-3.75451e-09
12.225	-2.33524e-09	-3.78798e-09
12.25	-2.40844e-09	-3.80975e-09
12.275	-2.46267e-09	-3.83242e-09
12.3	-2.52678e-09	-3.85343e-09
12.325	-2.58679e-09	-3.86695e-09
12.35	-2.67632e-09	-3.88452e-09
12.375	-2.74323e-09	-3.90965e-09
12.4	-2.78125e-09	-3.8969e-09
12.425	-2.84338e-09	-3.91588e-09
12.45	-2.89715e-09	-3.95066e-09
12.475	-2.93804e-09	-3.96255e-09
12.5	-3.01353e-09	-3.98953e-09
12.525	-3.06704e-09	-3.98648e-09
12.55	-3.11467e-09	-3.98177e-09
12.575	-3.19044e-09	-4.00636e-09
12.6	-3.23936e-09	-4.02585e-09
12.625	-3.32234e-09	-4.04417e-09
12.65	-3.38043e-09	-4.06267e-09
12.675	-3.43804e-09	-4.05499e-09
12.7	-3.46406e-09	-4.06856e-09
12.725	-3.50486e-09	-4.08674e-09
12.75	-3.59038e-09	-4.09556e-09
12.775	-3.65251e-09	-4.09293e-09
12.8	-3.73033e-09	-4.09551e-09
12.825	-3.80908e-09	-4.09484e-09
12.85	-3.86931e-09	-4.09926e-09
12.875	-3.90666e-09	-4.11608e-09
12.9	-3.99298e-09	-4.10215e-09
12.925	-4.0645e-09	-4.11561e-09
12.95	-4.16789e-09	-4.09617e-09
12.975	-4.24529e-09	-4.09333e-09
13	-4.29466e-09	-4.11285e-09
13.025	-4.34341e-09	-4.10337e-09
13.05	-4.35869e-09	-4.10742e-09
13.075	-4.38688e-09	-4.12261e-09
13.1	-4.45279e-09	-4.13719e-09
13.125	-4.50556e-09	-4.13909e-09
13.15	-4.53864e-09	-4.14793e-09
13.175	-4.58802e-09	-4.15002e-09
13.2	-4.63861e-09	-4.14291e-09
13.225	-4.68592e-09	-4.13273e-09
13.25	-4.72896e-09	-4.12796e-09
13.275	-4.77404e-09	-4.12059e-09
13.3	-4.80776e-09	-4.10209e-09
13.325	-4.85093e-09	-4.10018e-09
13.35	-4.90001e-09	-4.12083e-09
13.375	-4.91716e-09	-4.09912e-09
13.4	-4.94913e-09	-4.09791e-09
13.425	-4.98083e-09	-4.08243e-09
13.45	-5.03934e-09	-4.07903e-09
13.475	-5.04241e-09	-4.0732e-09
13.5	-5.10763e-09	-4.05926e-09
13.525	-5.14956e-09	-4.04549e-09
13.55	-5.16774e-09	-4.03515e-09
13.575	-5.21887e-09	-4.03392e-09
13.6	-5.28625e-09	-4.02733e-09
13.625	-5.30216e-09	-4.01256e-09
13.65	-5.29308e-09	-4.01797e-09
13.675	-5.31653e-09	-3.99782e-09
13.7	-5.34902e-09	-4.00197e-09
13.725	-5.37981e-09	-4.00786e-09
13.75	-5.42198e-09	-3.9933e-09
13.775	-5.47284e-09	-3.98655e-09
13.8	-5.53795e-09	-3.97816e-09
13.825	-5.56457e-09	-3.95212e-09
13.85	-5.54047e-09	-3.93438e-09
13.875	-5.57268e-09	-3.9284e-09
13.9	-5.58329e-09	-3.92913e-09
13.925	-5.5957e-09	-3.91412e-09
13.95	-5.6056e-09	-3.9224e-09
13.975	-5.65405e-09	-3.90241e-09
14	-5.68158e-09	-3.88313e-09
14.025	-5.69942e-09	-3.86935e-09
14.05	-5.73433e-09	-3.86766e-09
14.075	-5.76651e-09	-3.85532e-09
14.1	-5.78087e-09	-3.84428e-09
14.125	-5.78442e-09	-3.83492e-09
14.15	-5.80933e-09	-3.82763e-09
14.175	-5.79857e-09	-3.82299e-09
14.2	-5.84702e-09	-3.81089e-09
14.225	-5.87417e-09	-3.79819e-09
14.25	-5.8621e-09	-3.78131e-09
14.275	-5.85998e-09	-3.78519e-09
14.3	-5.84782e-09	-3.7594e-09
14.325	-5.9047e-09	-3.73748e-09
14.35	-5.92631e-09	-3.73864e-09
14.375	-5.93079e-09	-3.70177e-09
14.4	-5.93643e-09	-3.70407e-09
14.425	-5.91007e-09	-3.70197e-09
14.45	-5.9236e-09	-3.70497e-09
14.475	-5.91999e-09	-3.69189e-09
14.5	-5.88831e-09	-3.6765e-09
14.525	-5.90145e-09	-3.69707e-09
14.55	-5.91608e-09	-3.68034e-09
14.575	-5.92665e-09	-3.65804e-09
14.6	-5.88265e-09	-3.64638e-09
14.625	-5.8907e-09	-3.63522e-09
14.65	-5.86058e-09	-3.61861e-09
14.675	-5.86e-09	-3.61098e-09
14.7	-5.90402e-09	-3.60927e-09
14.725	-5.92262e-09	-3.59999e-09
14.75	-5.89973e-09	-3.58208e-09
14.775	-5.89564e-09	-3.56795e-09
14.8	-5.90114e-09	-3.57628e-09
14.825	-5.91469e-09	-3.54762e-09
14.85	-5.93608e-09	-3.52054e-09
14.875	-5.92428e-09	-3.50545e-09
14.9	-5.9384e-09	-3.49746e-09
14.925	-5.92463e-09	-3.48888e-09
14.95	-5.92296e-09	-3.47454e-09
14.975	-5.92602e-09	-3.48672e-09
15	-5.90167e-09	-3.49119e-09
15.025	-5.91491e-09	-3.47451e-09
15.05	-5.90271e-09	-3.45394e-09
15.075	-5.90187e-09	-3.43349e-09
15.1	-5.8693e-09	-3.4354e-09
15.125	-5.86176e-09	-3.40983e-09
15.15	-5.88734e-09	-3.4155e-09
15.175	-5.85799e-09	-3.3998e-09
15.2	-5.84014e-09	-3.3885e-09
15.225	-5.83718e-09	-3.37122e-09
15.25	-5.80741e-09	-3.36191e-09
15.275	-5.78961e-09	-3.35579e-09
15.3	-5.75427e-09	-3.33159e-09
15.325	-5.70941e-09	-3.3173e-09
15.35	-5.72178e-09	-3.30539e-09
15.375	-5.74196e-09	-3.30705e-09
15.4	-5.74023e-09	-3.29663e-09
15.425	-5.74011e-09	-3.27984e-09
15.45	-5.7228e-09	-3.27395e-09
15.475	-5.72802e-09	-3.27351e-09
15.5	-5.69392e-09	-3.25183e-09
15.525	-5.66253e-09	-3.23803e-09
15.55	-5.65844e-09	-3.23448e-09
15.575	-5.6142e-09	-3.21978e-09
15.6	-5.60764e-09	-3.19632e-09
15.625	-5.55928e-09	-3.19807e-09
15.65	-5.51004e-09	-3.19697e-09
15.675	-5.48376e-09	-3.16529e-09
15.7	-5.44968e-09	-3.15464e-09
15.725	-5.42593e-09	-3.16468e-09
15.75	-5.38031e-09	-3.16623e-09
15.775	-5.31784e-09	-3.1452e-09
15.8	-5.28744e-09	-3.135e-09
15.825	-5.28494e-09	-3.11331e-09
15.85	-5.24993e-09	-3.10577e-09
15.875	-5.24993e-09	-3.09249e-09
15.9	-5.20335e-09	-3.08747e-09
15.925	-5.18262e-09	-3.09182e-09
15.95	-5.14519e-09	-3.06337e-09
15.975	-5.09763e-09	-3.03843e-09
16	-5.07183e-09	-3.01062e-09
16.025	-5.05181e-09	-3.0104e-09
16.05	-5.03949e-09	-3.01261e-09
16.075	-5.03283e-09	-2.99933e-09
16.1	-4.98044e-09	-2.97946e-09
16.125	-4.95319e-09	-2.97217e-09
16.15	-4.92316e-09	-2.95568e-09
16.175	-4.92696e-09	-2.92543e-09
16.2	-4.90403e-09	-2.91084e-09
16.225	-4.83362e-09	-2.91157e-09
16.25	-4.83674e-09	-2.91218e-09
16.275	-4.83574e-09	-2.89847e-09
16.3	-4.78879e-09	-2.9037e-09
16.325	-4.77535e-09	-2.90216e-09
16.35	-4.76236e-09	-2.90386e-09
16.375	-4.72934e-09	-2.89599e-09
16.4	-4.67412e-09	-2.88065e-09
16.425	-4.65742e-09	-2.85198e-09
16.45	-4.62352e-09	-2.84746e-09
16.475	-4.60132e-09	-2.83808e-09
16.5	-4.54954e-09	-2.83165e-09
16.525	-4.48818e-09	-2.80533e-09
16.55	-4.45944e-09	-2.79911e-09
16.575	-4.42392e-09	-2.78155e-09
16.6	-4.40149e-09	-2.77951e-09
16.625	-4.38207e-09	-2.762e-09
16.65	-4.33886e-09	-2.76319e-09
16.675	-4.35912e-09	-2.74364e-09
16.7	-4.32703e-09	-2.73511e-09
16.725	-4.29151e-09	-2.73433e-09
16.75	-4.27122e-09	-2.73767e-09
16.775	-4.27064e-09	-2.72518e-09
16.8	-4.2561e-09	-2.7327e-09
16.825	-4.2152e-09	-2.69563e-09
16.85	-4.22043e-09	-2.64921e-09
16.875	-4.17891e-09	-2.65615e-09
16.9	-4.16734e-09	-2.6442e-09
16.925	-4.13598e-09	-2.62246e-09
16.95	-4.04774e-09	-2.60023e-09
16.975	-4.02312e-09	-2.58436e-09
17	-3.97713e-09	-2.61121e-09
17.025	-3.95323e-09	-2.59585e-09
17.05	-3.93375e-09	-2.59037e-09
17.075	-3.89225e-09	-2.56903e-09
17.1	-3.87956e-09	-2.5618e-09
17.125	-3.84411e-09	-2.58116e-09
17.15	-3.82873e-09	-2.5655e-09
17.175	-3.82078e-09	-2.55974e-09
17.2	-3.76312e-09	-2.55834e-09
17.225	-3.73532e-09	-2.55911e-09
17.25	-3.76053e-09	-2.53693e-09
17.275	-3.72964e-09	-2.51144e-09
17.3	-3.67993e-09	-2.48294e-09
17.325	-3.65396e-09	-2.47741e-09
17.35	-3.65014e-09	-2.47648e-09
17.375	-3.62361e-09	-2.46079e-09
17.4	-3.61693e-09	-2.44692e-09
17.425	-3.57674e-09	-2.44238e-09
17.45	-3.54562e-09	-2.43914e-09
17.475	-3.5223e-09	-2.4306e-09
17.5	-3.4892e-09	-2.41231e-09
17.525	-3.466e-09	-2.41589e-09
17.55	-3.45915e-09	-2.42443e-09
17.575	-3.4397e-09	-2.42415e-09
17.6	-3.42832e-09	-2.39326e-09
17.625	-3.38164e-09	-2.38559e-09
17.65	-3.35334e-09	-2.40102e-09
17.675	-3.33396e-09	-2.38727e-09
17.7	-3.31179e-09	-2.36047e-09
17.725	-3.27432e-09	-2.35734e-09
17.75	-3.27355e-09	-2.33516e-09
17.775	-3.24961e-09	-2.33863e-09
17.8	-3.18998e-09	-2.31438e-09
17.825	-3.12916e-09	-2.2857e-09
17.85	-3.11116e-09	-2.29118e-09
17.875	-3.07081e-09	-2.29466e-09
17.9	-3.04889e-09	-2.27878e-09
17.925	-3.03845e-09	-2.25964e-09
17.95	-3.03358e-09	-2.25931e-09
17.975	-2.99427e-09	-2.25242e-09
18	-2.98052e-09	-2.25848e-09
18.025	-2.97828e-09	-2.25643e-09
18.05	-2.9547e-09	-2.2359e-09
18.075	-2.92893e-09	-2.19901e-09
18.1	-2.91485e-09	-2.19323e-09
18.125	-2.89171e-09	-2.19557e-09
18.15	-2.84972e-09	-2.20975e-09
18.175	-2.85592e-09	-2.21688e-09
18.2	-2.83279e-09	-2.21142e-09
18.225	-2.83446e-09	-2.21267e-09
18.25	-2.80918e-09	-2.19853e-09
18.275	-2.76782e-09	-2.19527e-09
18.3	-2.75191e-09	-2.18422e-09
18.325	-2.72132e-09	-2.16979e-09
18.35	-2.6617e-09	-2.15963e-09
18.375	-2.67118e-09	-2.1569e-09
18.4	-2.63781e-09	-2.13502e-09
18.425	-2.63162e-09	-2.13616e-09
18.45	-2.6118e-09	-2.12363e-09
18.475	-2.57272e-09	-2.11972e-09
18.5	-2.53561e-09	-2.10101e-09
18.525	-2.48676e-09	-2.08843e-09
18.55	-2.49003e-09	-2.08521e-09
18.575	-2.44882e-09	-2.08282e-09
18.6	-2.43132e-09	-2.05224e-09
18.625	-2.4082e-09	-2.04591e-09
18.65	-2.39299e-09	-2.0534e-09
18.675	-2.36148e-09	-2.04199e-09
18.7	-2.35046e-09	-2.02333e-09
18.725	-2.30301e-09	-2.03687e-09
18.75	-2.28625e-09	-2.03567e-09
18.775	-2.24929e-09	-2.02271e-09
18.8	-2.24299e-09	-2.01629e-09
18.825	-2.22014e-09	-2.02752e-09
18.85	-2.2068e-09	-2.00871e-09
18.875	-2.17297e-09	-2.0208e-09
18.9	-2.13728e-09	-2.01593e-09
18.925	-2.13137e-09	-1.99545e-09
18.95	-2.09884e-09	-1.98627e-09
18.975	-2.08617e-09	-1.98449e-09
19	-2.07883e-09	-1.95547e-09
19.025	-2.04363e-09	-1.96482e-09
19.05	-2.02929e-09	-1.93843e-09
19.075	-2.0348e-09	-1.92804e-09
19.1	-2.05003e-09	-1.90805e-09
19.125	-2.04503e-09	-1.89712e-09
19.15	-2.00449e-09	-1.90149e-09
19.175	-1.98604e-09	-1.91579e-09
19.2	-1.9706e-09	-1.9129e-09
19.225	-1.94126e-09	-1.89909e-09
19.25	-1.92786e-09	-1.88812e-09
19.275	-1.89458e-09	-1.88968e-09
19.3	-1.89364e-09	-1.87321e-09
19.325	-1.90307e-09	-1.86683e-09
19.35	-1.88574e-09	-1.86023e-09
19.375	-1.82581e-09	-1.85288e-09
19.4	-1.81123e-09	-1.85316e-09
19.425	-1.80224e-09	-1.85425e-09
19.45	-1.7958e-09	-1.82949e-09
19.475	-1.77154e-09	-1.83296e-09
19.5	-1.76855e-09	-1.83819e-09
19.525	-1.72413e-09	-1.81961e-09
19.55	-1.72725e-09	-1.79685e-09
19.575	-1.7251e-09	-1.77851e-09
19.6	-1.71681e-09	-1.77976e-09
19.625	-1.70943e-09	-1.76396e-09
19.65	-1.69475e-09	-1.76777e-09
19.675	-1.68011e-09	-1.76527e-09
19.7	-1.6421e-09	-1.76197e-09
19.725	-1.64145e-09	-1.77406e-09
19.75	-1.65069e-09	-1.7834e-09
19.775	-1.61225e-09	-1.78189e-09
19.8	-1.57523e-09	-1.76763e-09
19.825	-1.59642e-09	-1.74092e-09
19.85	-1.59689e-09	-1.73766e-09
19.875	-1.57865e-09	-1.71564e-09
19.9	-1.54657e-09	-1.72011e-09
19.925	-1.52839e-09	-1.70712e-09
19.95	-1.53205e-09	-1.70529e-09
19.975	-1.52998e-09	-1.70418e-09
20	-1.51553e-09	-1.67491e-09
20.025	-1.47815e-09	-1.66716e-09
20.05	-1.45351e-09	-1.6651e-09
20.075	-1.45584e-09	-1.65587e-09
20.1	-1.44705e-09	-1.64151e-09
20.125	-1.4297e-09	-1.64435e-09
20.15	-1.38217e-09	-1.6431e-09
20.175	-1.4012e-09	-1.63419e-09
20.2	-1.2234e-09	-1.62059e-09
20.225	-1.33025e-09	-1.6267e-09
20.25	-1.35492e-09	-1.63073e-09
20.275	-1.35762e-09	-1.63662e-09
20.3	-1.33094e-09	-1.63077e-09
20.325	-1.30021e-09	-1.61857e-09
20.35	-1.27941e-09	-1.602e-09
20.375	-1.26942e-09	-1.61185e-09
20.4	-1.2573e-09	-1.59165e-09
20.425	-1.2509e-09	-1.58708e-09
20.45	-1.23731e-09	-1.56472e-09
20.475	-1.24777e-09	-1.56323e-09
20.5	-1.22394e-09	-1.54773e-09
20.525	-1.23166e-09	-1.53975e-09
20.55	-1.22043e-09	-1.53818e-09
20.575	-1.20056e-09	-1.51131e-09
20.6	-1.22043e-09	-1.50289e-09
20.625	-1.19609e-09	-1.49022e-09
20.65	-1.1777e-09	-1.48641e-09
20.675	-1.1979e-09	-1.46153e-09
20.7	-1.18148e-09	-1.44634e-09
20.725	-1.16715e-09	-1.4368e-09
20.75	-1.16306e-09	-1.43346e-09
20.775	-1.1588e-09	-1.41901e-09
20.8	-1.13764e-09	-1.41414e-09
20.825	-1.1061e-09	-1.40327e-09
20.85	-1.09463e-09	-1.41147e-09
20.875	-1.06341e-09	-1.39112e-09
20.9	-1.06368e-09	-1.36863e-09
20.925	-1.0517e-09	-1.33876e-09
20.95	-1.03382e-09	-1.32457e-09
20.975	-1.03367e-09	-1.3209e-09
21	-1.02367e-09	-1.29836e-09
21.025	-1.00425e-09	-1.29083e-09
21.05	-9.80319e-10	-1.27666e-09
21.075	-9.66695e-10	-1.27133e-09
21.1	-9.49851e-10	-1.24667e-09
21.125	-9.33564e-10	-1.22003e-09
21.15	-9.10356e-10	-1.20826e-09
21.175	-9.00335e-10	-1.19224e-09
21.2	-8.68073e-10	-1.17877e-09
21.225	-8.42376e-10	-1.15916e-09
21.25	-8.31356e-10	-1.13463e-09
21.275	-8.16538e-10	-1.1153e-09
21.3	-7.95118e-10	-1.11154e-09
21.325	-7.78743e-10	-1.09704e-09
21.35	-7.70922e-10	-1.07977e-09
21.375	-7.45583e-10	-1.06056e-09
21.4	-7.26561e-10	-1.03877e-09
21.425	-7.1596e-10	-1.03668e-09
21.45	-6.94869e-10	-1.02238e-09
21.475	-6.65683e-10	-1.01005e-09
21.5	-6.57101e-10	-1.00125e-09
21.525	-6.30131e-10	-9.89305e-10
21.55	-6.15902e-10	-9.86003e-10
21.575	-5.8223e-10	-9.63576e-10
21.6	-5.6479e-10	-9.47929e-10
21.625	-5.53116e-10	-9.35964e-10
21.65	-5.54327e-10	-9.06714e-10
21.675	-5.39118e-10	-9.09389e-10
21.7	-5.43274e-10	-8.9565e-10
21.725	-5.31719e-10	-8.96509e-10
21.75	-5.17653e-10	-8.87047e-10
21.775	-4.93572e-10	-8.70583e-10
21.8	-4.78481e-10	-8.40056e-10
21.825	-4.68957e-10	-8.35402e-10
21.85	-4.64367e-10	-8.18395e-10
21.875	-4.47588e-10	-7.9935e-10
21.9	-4.34136e-10	-7.77267e-10
21.925	-4.23695e-10	-7.57689e-10
21.95	-3.97633e-10	-7.60104e-10
21.975	-3.92067e-10	-7.55638e-10
22	-3.89835e-10	-7.39701e-10
22.025	-3.82073e-10	-7.24823e-10
22.05	-3.62094e-10	-7.23917e-10
22.075	-3.44735e-10	-7.07388e-10
22.1	-3.47403e-10	-7.00022e-10
22.125	-3.32942e-10	-6.89394e-10
22.15	-3.29331e-10	-6.72842e-10
22.175	-3.03168e-10	-6.62893e-10
22.2	-3.01009e-10	-6.54733e-10
22.225	-2.85182e-10	-6.50346e-10
22.25	-2.89483e-10	-6.4616e-10
22.275	-2.84355e-10	-6.40221e-10
22.3	-2.73766e-10	-6.37645e-10
22.325	-2.76281e-10	-6.2245e-10
22.35	-2.71588e-10	-6.14837e-10
22.375	-2.59963e-10	-6.16954e-10
22.4	-2.56339e-10	-6.1703e-10
22.425	-2.53362e-10	-6.19035e-10
22.45	-2.45341e-10	-6.0144e-10
22.475	-2.45056e-10	-5.71574e-10
22.5	-2.43934e-10	-5.77181e-10
22.525	-2.44426e-10	-5.71373e-10
22.55	-2.35701e-10	-5.75939e-10
22.575	-2.25693e-10	-5.59987e-10
22.6	-2.28829e-10	-5.49788e-10
22.625	-2.21592e-10	-5.37478e-10
22.65	-2.1136e-10	-5.43565e-10
22.675	-2.00995e-10	-5.32695e-10
22.7	-2.08385e-10	-5.24556e-10
22.725	-2.01764e-10	-5.24877e-10
22.75	-1.98009e-10	-5.29363e-10
22.775	-1.96816e-10	-5.16364e-10
22.8	-1.98413e-10	-5.14898e-10
22.825	-1.93701e-10	-5.18744e-10
22.85	-1.93775e-10	-5.16047e-10
22.875	-1.87212e-10	-5.06296e-10
22.9	-1.80295e-10	-4.99669e-10
22.925	-1.84296e-10	-4.97441e-10
22.95	-1.78592e-10	-4.9307e-10
22.975	-1.79984e-10	-4.86972e-10
23	-1.79781e-10	-4.8423e-10
23.025	-1.77919e-10	-4.74402e-10
23.05	-1.68036e-10	-4.62992e-10
23.075	-1.59622e-10	-4.7061e-10
23.1	-1.48495e-10	-4.67261e-10
23.125	-1.48519e-10	-4.62252e-10
23.15	-1.48145e-10	-4.64414e-10
23.175	-1.45406e-10	-4.55801e-10
23.2	-1.41933e-10	-4.50821e-10
23.225	-1.38732e-10	-4.5149e-10
23.25	-1.33161e-10	-4.43575e-10
23.275	-1.33647e-10	-4.4061e-10
23.3	-1.35768e-10	-4.38628e-10
23.325	-1.33374e-10	-4.37567e-10
23.35	-1.27754e-10	-4.34247e-10
23.375	-1.3328e-10	-4.34316e-10
23.4	-1.33961e-10	-4.42104e-10
23.425	-1.30669e-10	-4.33985e-10
23.45	-1.25488e-10	-4.28655e-10
23.475	-1.26929e-10	-4.32519e-10
23.5	-1.31779e-10	-4.36324e-10
23.525	-1.29882e-10	-4.26536e-10
23.55	-1.27719e-10	-4.16902e-10
23.575	-1.26805e-10	-4.12484e-10
23.6	-1.25038e-10	-4.02212e-10
23.625	-1.21233e-10	-4.07117e-10
23.65	-1.20208e-10	-4.00393e-10
23.675	-1.17393e-10	-3.96149e-10
23.7	-1.09722e-10	-3.94512e-10
23.725	-1.14023e-10	-3.89898e-10
23.75	-1.15288e-10	-3.83904e-10
23.775	-1.10015e-10	-3.83229e-10
23.8	-1.0989e-10	-3.77399e-10
23.825	-1.06519e-10	-3.70893e-10
23.85	-1.14486e-10	-3.66305e-10
23.875	-1.20008e-10	-3.64327e-10
23.9	-1.22775e-10	-3.65625e-10
23.925	-1.08786e-10	-3.63066e-10
23.95	-1.12117e-10	-3.60019e-10
23.975	-1.11477e-10	-3.50716e-10
24	-1.15518e-10	-3.55109e-10
24.025	-1.08086e-10	-3.56493e-10
24.05	-1.10855e-10	-3.55456e-10
24.075	-1.14077e-10	-3.55861e-10
24.1	-1.16115e-10	-3.57271e-10
24.125	-1.09449e-10	-3.54165e-10
24.15	-1.10297e-10	-3.4576e-10
24.175	-1.1209e-10	-3.42967e-10
24.2	-1.11938e-10	-3.45305e-10
24.225	-1.03436e-10	-3.3549e-10
24.25	-1.0416e-10	-3.36293e-10
24.275	-1.09814e-10	-3.36363e-10
24.3	-1.14753e-10	-3.34012e-10
24.325	-1.09341e-10	-3.33108e-10
24.35	-1.08603e-10	-3.27095e-10
24.375	-1.11469e-10	-3.30242e-10
24.4	-1.10947e-10	-3.31476e-10
24.425	-1.10759e-10	-3.25657e-10
24.45	-1.1295e-10	-3.26978e-10
24.475	-1.11888e-10	-3.32434e-10
24.5	-1.07147e-10	-3.32372e-10
24.525	-1.06263e-10	-3.21133e-10
24.55	-1.17713e-10	-3.21298e-10
24.575	-1.10313e-10	-3.26566e-10
24.6	-1.04263e-10	-3.3534e-10
24.625	-1.07551e-10	-3.27977e-10
24.65	-1.14001e-10	-3.25378e-10
24.675	-1.06969e-10	-3.22365e-10
24.7	-1.06145e-10	-3.25329e-10
24.725	-1.07151e-10	-3.21157e-10
24.75	-1.12505e-10	-3.18881e-10
24.775	-1.14146e-10	-3.23626e-10
24.8	-1.06282e-10	-3.16501e-10
24.825	-1.08149e-10	-3.14702e-10
24.85	-1.06062e-10	-3.17838e-10
24.875	-1.10242e-10	-3.11781e-10
24.9	-1.05246e-10	-3.14397e-10
24.925	-1.03164e-10	-3.16439e-10
24.95	-1.05235e-10	-3.17419e-10
24.975	-1.07627e-10	-3.13932e-10
25	-1.03851e-10	-3.14438e-10
25.025	-1.01232e-10	-3.17079e-10
25.05	-9.94003e-11	-3.13194e-10
25.075	-9.89949e-11	-3.01794e-10
25.1	-1.01629e-10	-3.0308e-10
25.125	-1.03705e-10	-3.08729e-10
25.15	-1.02639e-10	-3.06783e-10
25.175	-1.00796e-10	-3.0218e-10
25.2	-1.00717e-10	-3.01945e-10
25.225	-9.99988e-11	-3.07017e-10
25.25	-9.92449e-11	-3.02234e-10
25.275	-9.93091e-11	-3.03207e-10
25.3	-9.76549e-11	-3.08563e-10
25.325	-9.68734e-11	-3.02706e-10
25.35	-1.01128e-10	-2.94361e-10
25.375	-1.00173e-10	-2.96227e-10
25.4	-9.64571e-11	-2.97049e-10
25.425	-1.02719e-10	-2.9462e-10
25.45	-1.00461e-10	-2.95067e-10
25.475	-1.03234e-10	-2.90804e-10
25.5	-1.02327e-10	-2.95957e-10
25.525	-9.9207e-11	-2.94629e-10
25.55	-1.01979e-10	-2.96636e-10
25.575	-9.81443e-11	-2.97509e-10
25.6	-9.73606e-11	-3.00608e-10
25.625	-1.00039e-10	-3.01078e-10
25.65	-1.01431e-10	-2.99864e-10
25.675	-1.00287e-10	-2.94918e-10
25.7	-1.00425e-10	-2.93661e-10
25.725	-9.41262e-11	-2.87324e-10
25.75	-9.57857e-11	-2.94071e-10
25.775	-8.72882e-11	-2.99477e-10
25.8	-9.89197e-11	-2.97658e-10
25.825	-1.02023e-10	-2.92481e-10
25.85	-1.00853e-10	-2.97424e-10
25.875	-9.19584e-11	-2.99376e-10
25.9	-1.00533e-10	-3.00877e-10
25.925	-9.97012e-11	-2.93057e-10
25.95	-1.02608e-10	-2.97085e-10
25.975	-9.77308e-11	-2.96219e-10
26	-9.79586e-11	-2.93191e-10
26.025	-1.01639e-10	-2.8831e-10
26.05	-1.03445e-10	-2.87447e-10
26.075	-9.82401e-11	-2.91165e-10
26.1	-9.99303e-11	-2.95324e-10
26.125	-1.03883e-10	-2.92401e-10
26.15	-1.03939e-10	-2.94307e-10
26.175	-1.006e-10	-2.91718e-10
26.2	-9.99136e-11	-2.95243e-10
26.225	-9.71038e-11	-2.9744e-10
26.25	-1.00736e-10	-2.89295e-10
26.275	-9.95104e-11	-2.85774e-10
26.3	-9.89496e-11	-2.89923e-10
26.325	-9.41453e-11	-2.88021e-10
26.35	-9.41499e-11	-2.87919e-10
26.375	-9.67827e-11	-2.81312e-10
26.4	-1.03387e-10	-2.86064e-10
26.425	-1.02564e-10	-2.86018e-10
26.45	-9.92398e-11	-2.94383e-10
26.475	-9.64054e-11	-2.93523e-10
26.5	-1.05361e-10	-2.91701e-10
26.525	-1.04258e-10	-2.8675e-10
26.55	-1.00042e-10	-2.9165e-10
26.575	-1.00557e-10	-2.88028e-10
26.6	-1.02674e-10	-2.86883e-10
26.625	-1.02241e-10	-2.86655e-10
26.65	-9.43628e-11	-2.88382e-10
26.675	-9.53767e-11	-2.87662e-10
26.7	-9.69616e-11	-2.83025e-10
26.725	-1.05238e-10	-2.85433e-10
26.75	-1.02563e-10	-2.86347e-10
26.775	-1.06762e-10	-2.86617e-10
26.8	-9.95859e-11	-2.85806e-10
26.825	-1.0216e-10	-2.85771e-10
26.85	-1.01038e-10	-2.87513e-10
26.875	-1.01048e-10	-2.92832e-10
26.9	-1.00044e-10	-2.92302e-10
26.925	-9.78767e-11	-2.93301e-10
26.95	-1.00473e-10	-2.8967e-10
26.975	-1.00135e-10	-2.87673e-10
27	-9.6509e-11	-2.86605e-10
27.025	-1.00422e-10	-2.86386e-10
27.05	-9.51802e-11	-2.85624e-10
27.075	-9.21933e-11	-2.83463e-10
27.1	-9.55069e-11	-2.80092e-10
27.125	-9.30989e-11	-2.82528e-10
27.15	-9.5636e-11	-2.86122e-10
27.175	-9.74323e-11	-2.85379e-10
27.2	-9.46469e-11	-2.82119e-10
27.225	-9.12452e-11	-2.83586e-10
27.25	-9.33395e-11	-2.84267e-10
27.275	-9.41635e-11	-2.83273e-10
27.3	-9.45529e-11	-2.82594e-10
27.325	-9.34473e-11	-2.90049e-10
27.35	-9.31917e-11	-2.88059e-10
27.375	-9.34745e-11	-2.89298e-10
27.4	-9.50387e-11	-2.8576e-10
27.425	-9.24282e-11	-2.83426e-10
27.45	-9.01844e-11	-2.85306e-10
27.475	-9.07983e-11	-2.83613e-10
27.5	-8.90482e-11	-2.82696e-10
27.525	-8.84982e-11	-2.79681e-10
27.55	-9.19325e-11	-2.83156e-10
27.575	-9.19054e-11	-2.905e-10
27.6	-9.16111e-11	-2.86195e-10
27.625	-8.27721e-11	-2.79935e-10
27.65	-9.55004e-11	-2.67253e-10
27.675	-9.45842e-11	-2.63337e-10
27.7	-9.44689e-11	-2.73604e-10
27.725	-8.403e-11	-2.74842e-10
27.75	-9.72797e-11	-2.72906e-10
27.775	-9.71822e-11	-2.63568e-10
27.8	-9.3416e-11	-2.72918e-10
27.825	-9.07317e-11	-2.73976e-10
27.85	-9.63477e-11	-2.73902e-10
27.875	-9.73494e-11	-2.71839e-10
27.9	-9.59271e-11	-2.75411e-10
27.925	-9.00374e-11	-2.76519e-10
27.95	-8.78172e-11	-2.76924e-10
27.975	-8.90656e-11	-2.72146e-10
28	-8.7989e-11	-2.73767e-10
28.025	-8.80219e-11	-2.78653e-10
28.05	-8.47126e-11	-2.79175e-10
28.075	-8.91432e-11	-2.78955e-10
28.1	-9.06551e-11	-2.78516e-10
28.125	-9.10778e-11	-2.81552e-10
28.15	-8.65078e-11	-2.79436e-10
28.175	-8.46325e-11	-2.78373e-10
28.2	-8.81009e-11	-2.78345e-10
28.225	-8.86156e-11	-2.79664e-10
28.25	-9.92855e-11	-2.82038e-10
28.275	-9.55876e-11	-2.7903e-10
28.3	-9.53038e-11	-2.74365e-10
28.325	-9.39868e-11	-2.76463e-10
28.35	-9.48031e-11	-2.71869e-10
28.375	-9.61875e-11	-2.67477e-10
28.4	-9.26432e-11	-2.73482e-10
28.425	-9.26145e-11	-2.71349e-10
28.45	-9.66056e-11	-2.72372e-10
28.475	-9.88347e-11	-2.69204e-10
28.5	-9.19209e-11	-2.65914e-10
28.525	-9.0085e-11	-2.6057e-10
28.55	-8.81843e-11	-2.59057e-10
28.575	-9.36964e-11	-2.6188e-10
28.6	-8.86837e-11	-2.78379e-10
28.625	-8.92332e-11	-2.74148e-10
28.65	-8.85715e-11	-2.68315e-10
28.675	-8.95516e-11	-2.62411e-10
28.7	-8.3068e-11	-2.65831e-10
28.725	-8.44925e-11	-2.74604e-10
28.75	-8.45957e-11	-2.65801e-10
28.775	-8.48174e-11	-2.66324e-10
28.8	-8.77264e-11	-2.71147e-10
28.825	-8.78851e-11	-2.71492e-10
28.85	-8.55421e-11	-2.64523e-10
28.875	-8.9652e-11	-2.68368e-10
28.9	-9.50211e-11	-2.72709e-10
28.925	-9.34287e-11	-2.74627e-10
28.95	-9.49818e-11	-2.72835e-10
28.975	-9.69079e-11	-2.7072e-10
29	-9.35605e-11	-2.71741e-10
29.025	-9.13282e-11	-2.77191e-10
29.05	-9.30441e-11	-2.75631e-10
29.075	-9.33951e-11	-2.7302e-10
29.1	-9.56113e-11	-2.64955e-10
29.125	-9.41971e-11	-2.65678e-10
29.15	-8.93161e-11	-2.68643e-10
29.175	-9.13591e-11	-2.67807e-10
29.2	-8.61175e-11	-2.72778e-10
29.225	-8.65257e-11	-2.66558e-10
29.25	-9.06738e-11	-2.64696e-10
29.275	-9.11968e-11	-2.68905e-10
29.3	-9.18698e-11	-2.69383e-10
29.325	-9.4464e-11	-2.62594e-10
29.35	-8.80768e-11	-2.67676e-10
29.375	-8.51595e-11	-2.67355e-10
29.4	-8.92621e-11	-2.69029e-10
29.425	-8.9844e-11	-2.66704e-10
29.45	-9.07321e-11	-2.70839e-10
29.475	-8.35963e-11	-2.68348e-10
29.5	-9.02532e-11	-2.67344e-10
29.525	-8.53246e-11	-2.68087e-10
29.55	-8.48765e-11	-2.68693e-10
29.575	-7.43104e-11	-2.71655e-10
29.6	-8.67851e-11	-2.71498e-10
29.625	-9.14303e-11	-2.67216e-10
29.65	-9.36423e-11	-2.67975e-10
29.675	-8.6686e-11	-2.602e-10
29.7	-8.79631e-11	-2.63934e-10
29.725	-8.78175e-11	-2.6121e-10
29.75	-8.74717e-11	-2.61272e-10
29.775	-8.59515e-11	-2.55059e-10
29.8	-8.58847e-11	-2.59016e-10
29.825	-9.03309e-11	-2.58476e-10
29.85	-8.79097e-11	-2.5906e-10
29.875	-8.61695e-11	-2.62084e-10
29.9	-8.35564e-11	-2.59567e-10
29.925	-8.68768e-11	-2.60212e-10
29.95	-8.98742e-11	-2.54577e-10
29.975	-9.37165e-11	-2.6188e-10
30	-9.43085e-11	-2.63034e-10
30.025	-9.06551e-11	-2.58187e-10
30.05	-8.88205e-11	-2.57017e-10
30.075	-8.92504e-11	-2.6135e-10
30.1	-9.88508e-11	-2.61481e-10
30.125	-9.52022e-11	-2.61381e-10
30.15	-9.23064e-11	-2.61937e-10
30.175	-9.09513e-11	-2.6921e-10
30.2	-9.6496e-11	-2.65061e-10
30.225	-9.8169e-11	-2.67332e-10
30.25	-9.4065e-11	-2.58714e-10
30.275	-9.45741e-11	-2.52901e-10
30.3	-9.93497e-11	-2.53381e-10
30.325	-9.66252e-11	-2.5523e-10
30.35	-8.50379e-11	-2.59253e-10
30.375	-8.52123e-11	-2.54995e-10
30.4	-8.93401e-11	-2.57848e-10
30.425	-8.93365e-11	-2.55017e-10
30.45	-8.85367e-11	-2.54196e-10
30.475	-8.73023e-11	-2.55156e-10
30.5	-8.54956e-11	-2.56303e-10
30.525	-8.44532e-11	-2.5472e-10
30.55	-8.43425e-11	-2.57062e-10
30.575	-8.69448e-11	-2.68459e-10
30.6	-8.74458e-11	-2.62457e-10
30.625	-8.68698e-11	-2.63826e-10
30.65	-8.99692e-11	-2.63321e-10
30.675	-8.95806e-11	-2.72162e-10
30.7	-8.94214e-11	-2.6274e-10
30.725	-8.78752e-11	-2.67382e-10
30.75	-9.16369e-11	-2.65939e-10
30.775	-8.7833e-11	-2.7534e-10
30.8	-8.73479e-11	-2.64029e-10
30.825	-9.15258e-11	-2.64273e-10
30.85	-9.05181e-11	-2.62217e-10
30.875	-8.98343e-11	-2.66006e-10
30.9	-8.94359e-11	-2.59084e-10
30.925	-9.5402e-11	-2.63096e-10
30.95	-8.99185e-11	-2.66598e-10
30.975	-8.75385e-11	-2.68204e-10
31	-9.01339e-11	-2.69072e-10
31.025	-9.13129e-11	-2.70081e-10
31.05	-8.98067e-11	-2.68737e-10
31.075	-9.10099e-11	-2.62596e-10
31.1	-9.19253e-11	-2.6428e-10
31.125	-8.43301e-11	-2.69549e-10
31.15	-8.18381e-11	-2.64539e-10
31.175	-8.51257e-11	-2.67445e-10
31.2	-8.83141e-11	-2.67635e-10
31.225	-9.00631e-11	-2.72722e-10
31.25	-9.16704e-11	-2.7126e-10
31.275	-8.91822e-11	-2.70862e-10
31.3	-9.20162e-11	-2.66307e-10
31.325	-8.61007e-11	-2.65745e-10
31.35	-9.26501e-11	-2.7251e-10
31.375	-8.96438e-11	-2.71665e-10
31.4	-9.0305e-11	-2.70169e-10
31.425	-7.87154e-11	-2.70688e-10
31.45	-9.00652e-11	-2.74247e-10
31.475	-9.49344e-11	-2.77383e-10
31.5	-9.81278e-11	-2.74803e-10
31.525	-9.17298e-11	-2.72639e-10
31.55	-9.08118e-11	-2.71231e-10
31.575	-9.03015e-11	-2.75525e-10
31.6	-8.98754e-11	-2.73221e-10
31.625	-8.89975e-11	-2.69797e-10
31.65	-8.85871e-11	-2.72922e-10
31.675	-8.78986e-11	-2.70826e-10
31.7	-9.09364e-11	-2.70859e-10
31.725	-9.38939e-11	-2.73573e-10
31.75	-9.31407e-11	-2.73649e-10
31.775	-9.4982e-11	-2.78107e-10
31.8	-9.79852e-11	-2.75439e-10
31.825	-9.35585e-11	-2.72612e-10
31.85	-9.43686e-11	-2.71067e-10
31.875	-9.05175e-11	-2.76564e-10
31.9	-8.96614e-11	-2.76228e-10
31.925	-9.17754e-11	-2.7538e-10
31.95	-9.01737e-11	-2.76563e-10
31.975	-8.85097e-11	-2.77742e-10
32	-8.75845e-11	-2.69349e-10
32.025	-8.54293e-11	-2.72765e-10
32.05	-9.29245e-11	-2.75689e-10
32.075	-9.33059e-11	-2.75806e-10
32.1	-8.71244e-11	-2.64521e-10
32.125	-8.68641e-11	-2.68025e-10
32.15	-8.90205e-11	-2.73893e-10
32.175	-9.07821e-11	-2.75367e-10
32.2	-8.21598e-11	-2.6293e-10
32.225	-8.82437e-11	-2.59003e-10
32.25	-8.84837e-11	-2.66163e-10
32.275	-8.90759e-11	-2.67943e-10
32.3	-8.49373e-11	-2.65069e-10
32.325	-8.23476e-11	-2.61912e-10
32.35	-8.50506e-11	-2.71061e-10
32.375	-8.67e-11	-2.70872e-10
32.4	-8.55163e-11	-2.68255e-10
32.425	-8.45014e-11	-2.67592e-10
32.45	-8.82917e-11	-2.68555e-10
32.475	-8.94865e-11	-2.6009e-10
32.5	-9.02311e-11	-2.62421e-10
32.525	-9.09508e-11	-2.62442e-10
32.55	-9.1814e-11	-2.66861e-10
32.575	-9.27218e-11	-2.63614e-10
32.6	-9.48639e-11	-2.61942e-10
32.625	-9.24127e-11	-2.58117e-10
32.65	-9.23653e-11	-2.60729e-10
32.675	-9.29484e-11	-2.55856e-10
32.7	-9.12113e-11	-2.56944e-10
32.725	-9.49938e-11	-2.57806e-10
32.75	-9.47025e-11	-2.56469e-10
32.775	-9.53349e-11	-2.58093e-10
32.8	-9.77236e-11	-2.62347e-10
32.825	-9.2331e-11	-2.68229e-10
32.85	-9.29104e-11	-2.65242e-10
32.875	-9.25385e-11	-2.62492e-10
32.9	-9.16839e-11	-2.57676e-10
32.925	-8.79796e-11	-2.57103e-10
32.95	-8.9868e-11	-2.67909e-10
32.975	-9.25153e-11	-2.57628e-10
33	-9.30106e-11	-2.61767e-10
33.025	-9.06786e-11	-2.64372e-10
33.05	-9.32696e-11	-2.72361e-10
33.075	-8.9583e-11	-2.66104e-10
33.1	-8.93077e-11	-2.66215e-10
33.125	-9.39473e-11	-2.62557e-10
33.15	-9.25269e-11	-2.66974e-10
33.175	-8.2967e-11	-2.66702e-10
33.2	-9.28519e-11	-2.63119e-10
33.225	-9.20409e-11	-2.65486e-10
33.25	-9.23979e-11	-2.66335e-10
33.275	-8.60339e-11	-2.62868e-10
33.3	-9.43224e-11	-2.60207e-10
33.325	-9.61181e-11	-2.57995e-10
33.35	-9.39869e-11	-2.65402e-10
33.375	-9.08472e-11	-2.61425e-10
33.4	-8.83013e-11	-2.65209e-10
33.425	-8.69817e-11	-2.61379e-10
33.45	-8.99482e-11	-2.53829e-10
33.475	-8.70606e-11	-2.57314e-10
33.5	-8.64687e-11	-2.60983e-10
33.525	-8.86989e-11	-2.64759e-10
33.55	-9.10661e-11	-2.5754e-10
33.575	-9.35391e-11	-2.62785e-10
33.6	-9.27116e-11	-2.60329e-10
33.625	-9.5903e-11	-2.6486e-10
33.65	-9.46213e-11	-2.64003e-10
33.675	-9.3542e-11	-2.56831e-10
33.7	-9.46829e-11	-2.5432e-10
33.725	-9.16478e-11	-2.58654e-10
33.75	-8.89496e-11	-2.57473e-10
33.775	-8.78334e-11	-2.56979e-10
33.8	-1.00591e-10	-2.54047e-10
33.825	-9.50026e-11	-2.59145e-10
33.85	-9.17967e-11	-2.58605e-10
33.875	-9.02459e-11	-2.5684e-10
33.9	-9.25143e-11	-2.61939e-10
33.925	-9.27466e-11	-2.61218e-10
33.95	-9.04934e-11	-2.59231e-10
33.975	-9.30122e-11	-2.61761e-10
34	-9.5915e-11	-2.62457e-10
34.025	-9.87533e-11	-2.64848e-10
34.05	-8.80527e-11	-2.57248e-10
34.075	-9.34756e-11	-2.6131e-10
34.1	-9.30303e-11	-2.64041e-10
34.125	-9.64627e-11	-2.61334e-10
34.15	-9.94551e-11	-2.61257e-10
34.175	-1.01339e-10	-2.64327e-10
34.2	-1.0073e-10	-2.5968e-10
34.225	-9.37514e-11	-2.57284e-10
34.25	-8.61996e-11	-2.57009e-10
34.275	-8.93329e-11	-2.57103e-10
34.3	-9.18126e-11	-2.59184e-10
34.325	-9.24986e-11	-2.58029e-10
34.35	-9.14123e-11	-2.63594e-10
34.375	-9.07762e-11	-2.51804e-10
34.4	-8.96654e-11	-2.58207e-10
34.425	-9.26518e-11	-2.58497e-10
34.45	-8.93645e-11	-2.56363e-10
34.475	-8.66435e-11	-2.43168e-10
34.5	-8.92223e-11	-2.59385e-10
34.525	-9.34822e-11	-2.59172e-10
34.55	-9.49535e-11	-2.59215e-10
34.575	-9.54625e-11	-2.58746e-10
34.6	-9.50652e-11	-2.58164e-10
34.625	-9.42204e-11	-2.56615e-10
34.65	-9.49425e-11	-2.57202e-10
34.675	-9.52775e-11	-2.60296e-10
34.7	-8.84718e-11	-2.61293e-10
34.725	-8.73272e-11	-2.60906e-10
34.75	-9.2109e-11	-2.5895e-10
34.775	-9.03379e-11	-2.56937e-10
34.8	-8.64545e-11	-2.60564e-10
34.825	-8.44982e-11	-2.59649e-10
34.85	-8.55021e-11	-2.53855e-10
34.875	-8.59953e-11	-2.58794e-10
34.9	-8.96417e-11	-2.57126e-10
34.925	-8.22687e-11	-2.5691e-10
34.95	-8.65674e-11	-2.60231e-10
34.975	-8.49388e-11	-2.68431e-10
35	-8.67584e-11	-2.68656e-10
35.025	-7.78278e-11	-2.63953e-10
35.05	-8.83774e-11	-2.6596e-10
35.075	-8.95482e-11	-2.65394e-10
35.1	-9.49934e-11	-2.70217e-10
35.125	-8.73191e-11	-2.73553e-10
35.15	-9.01722e-11	-2.66309e-10
35.175	-8.70154e-11	-2.61635e-10
35.2	-8.97414e-11	-2.6561e-10
35.225	-8.75246e-11	-2.70583e-10
35.25	-8.44395e-11	-2.61664e-10
35.275	-8.672e-11	-2.63845e-10
35.3	-9.19857e-11	-2.63943e-10
35.325	-9.53029e-11	-2.73536e-10
35.35	-9.21843e-11	-2.59332e-10
35.375	-9.16575e-11	-2.61897e-10
35.4	-9.18615e-11	-2.60128e-10
35.425	-9.2067e-11	-2.68347e-10
35.45	-8.68714e-11	-2.61418e-10
35.475	-8.67729e-11	-2.57351e-10
35.5	-8.05461e-11	-2.5604e-10
35.525	-8.15314e-11	-2.63577e-10
35.55	-9.29728e-11	-2.54653e-10
35.575	-8.35094e-11	-2.50702e-10
35.6	-8.4167e-11	-2.53245e-10
35.625	-8.56306e-11	-2.56243e-10
35.65	-9.02223e-11	-2.5749e-10
35.675	-8.62345e-11	-2.56723e-10
35.7	-8.68312e-11	-2.59686e-10
35.725	-9.10256e-11	-2.57154e-10
35.75	-9.37738e-11	-2.58657e-10
35.775	-9.53733e-11	-2.57585e-10
35.8	-9.20228e-11	-2.61017e-10
35.825	-9.26122e-11	-2.61539e-10
35.85	-9.5147e-11	-2.60646e-10
35.875	-9.23449e-11	-2.60176e-10
35.9	-8.92832e-11	-2.62974e-10
35.925	-9.24123e-11	-2.61027e-10
35.95	-9.18552e-11	-2.64435e-10
35.975	-9.67926e-11	-2.62971e-10
36	-9.40543e-11	-2.6147e-10
36.025	-9.6046e-11	-2.61048e-10
36.05	-9.62664e-11	-2.60317e-10
36.075	-9.58874e-11	-2.59806e-10
36.1	-8.91271e-11	-2.59895e-10
36.125	-9.0898e-11	-2.58231e-10
36.15	-9.15121e-11	-2.62685e-10
36.175	-9.02683e-11	-2.62112e-10
36.2	-9.08629e-11	-2.61545e-10
36.225	-8.95906e-11	-2.61689e-10
36.25	-9.07239e-11	-2.58831e-10
36.275	-8.98791e-11	-2.57521e-10
36.3	-9.05051e-11	-2.56052e-10
36.325	-8.98769e-11	-2.56446e-10
36.35	-8.47242e-11	-2.57719e-10
36.375	-8.49552e-11	-2.58053e-10
36.4	-8.84447e-11	-2.53131e-10
36.425	-8.96507e-11	-2.54791e-10
36.45	-9.56665e-11	-2.53015e-10
36.475	-9.32878e-11	-2.52024e-10
36.5	-8.71274e-11	-2.55967e-10
36.525	-9.04397e-11	-2.54564e-10
36.55	-9.17391e-11	-2.5701e-10
36.575	-8.9672e-11	-2.534e-10
36.6	-9.50255e-11	-2.59928e-10
36.625	-9.1823e-11	-2.56745e-10
36.65	-9.4203e-11	-2.53638e-10
36.675	-9.19384e-11	-2.58377e-10
36.7	-9.71108e-11	-2.58526e-10
36.725	-9.44028e-11	-2.57406e-10
36.75	-8.79035e-11	-2.54205e-10
36.775	-7.97067e-11	-2.58267e-10
36.8	-8.71762e-11	-2.59823e-10
36.825	-8.85853e-11	-2.54823e-10
36.85	-9.19251e-11	-2.46038e-10
36.875	-8.38251e-11	-2.56505e-10
36.9	-9.24334e-11	-2.61236e-10
36.925	-9.01974e-11	-2.56978e-10
36.95	-9.14235e-11	-2.52321e-10
36.975	-7.83979e-11	-2.55974e-10
37	-8.36986e-11	-2.60231e-10
37.025	-8.43365e-11	-2.59648e-10
37.05	-8.91588e-11	-2.52596e-10
37.075	-8.5758e-11	-2.49484e-10
37.1	-9.07369e-11	-2.54755e-10
37.125	-8.97854e-11	-2.55263e-10
37.15	-9.01103e-11	-2.50763e-10
37.175	-8.66599e-11	-2.47383e-10
37.2	-8.66223e-11	-2.47386e-10
37.225	-8.58249e-11	-2.52021e-10
37.25	-8.2017e-11	-2.49922e-10
37.275	-8.20868e-11	-2.53346e-10
37.3	-8.76839e-11	-2.56411e-10
37.325	-8.99931e-11	-2.52039e-10
37.35	-9.17304e-11	-2.53813e-10
37.375	-8.89824e-11	-2.51394e-10
37.4	-9.18846e-11	-2.48987e-10
37.425	-8.65261e-11	-2.52483e-10
37.45	-8.7243e-11	-2.46799e-10
37.475	-8.67603e-11	-2.46822e-10
37.5	-9.71551e-11	-2.49378e-10
37.525	-9.32424e-11	-2.48742e-10
37.55	-9.11728e-11	-2.49881e-10
37.575	-8.48614e-11	-2.4744e-10
37.6	-9.01305e-11	-2.51614e-10
37.625	-8.63184e-11	-2.46566e-10
37.65	-8.53485e-11	-2.42598e-10
37.675	-8.64908e-11	-2.45826e-10
37.7	-8.86064e-11	-2.45906e-10
37.725	-9.06762e-11	-2.40666e-10
37.75	-8.77084e-11	-2.40441e-10
37.775	-8.86533e-11	-2.36557e-10
37.8	-9.05012e-11	-2.47245e-10
37.825	-8.87959e-11	-2.44088e-10
37.85	-8.75934e-11	-2.51575e-10
37.875	-9.0525e-11	-2.44012e-10
37.9	-8.87385e-11	-2.51146e-10
37.925	-8.88155e-11	-2.45034e-10
37.95	-8.58373e-11	-2.44834e-10
37.975	-8.30532e-11	-2.45134e-10
38	-8.1625e-11	-2.49562e-10
38.025	-8.12116e-11	-2.48602e-10
38.05	-8.45209e-11	-2.41198e-10
38.075	-8.86634e-11	-2.39376e-10
38.1	-9.08925e-11	-2.45593e-10
38.125	-9.35615e-11	-2.46962e-10
38.15	-9.25492e-11	-2.49442e-10
38.175	-9.24314e-11	-2.48806e-10
38.2	-9.22631e-11	-2.44149e-10
38.225	-9.22071e-11	-2.47366e-10
38.25	-9.03994e-11	-2.51092e-10
38.275	-9.52885e-11	-2.51349e-10
38.3	-9.49158e-11	-2.48703e-10
38.325	-9.48127e-11	-2.47979e-10
38.35	-9.6296e-11	-2.4737e-10
38.375	-8.75271e-11	-2.46533e-10
38.4	-8.97223e-11	-2.48968e-10
38.425	-8.90493e-11	-2.41303e-10
38.45	-8.9467e-11	-2.43784e-10
38.475	-9.39449e-11	-2.45956e-10
38.5	-9.48165e-11	-2.37297e-10
38.525	-8.90798e-11	-2.40232e-10
38.55	-9.00998e-11	-2.45729e-10
38.575	-9.11782e-11	-2.45713e-10
38.6	-8.92836e-11	-2.47616e-10
38.625	-9.13037e-11	-2.49598e-10
38.65	-9.43962e-11	-2.4819e-10
38.675	-9.17342e-11	-2.52294e-10
38.7	-9.13044e-11	-2.50709e-10
38.725	-8.75303e-11	-2.47238e-10
38.75	-9.0207e-11	-2.43758e-10
38.775	-9.15239e-11	-2.40766e-10
38.8	-9.06079e-11	-2.48307e-10
38.825	-8.46811e-11	-2.48155e-10
38.85	-8.57237e-11	-2.48743e-10
38.875	-8.91574e-11	-2.49574e-10
38.9	-9.37617e-11	-2.50297e-10
38.925	-8.49594e-11	-2.43505e-10
38.95	-8.65358e-11	-2.43221e-10
38.975	-9.04452e-11	-2.42857e-10
39	-8.58622e-11	-2.39767e-10
39.025	-8.34895e-11	-2.37793e-10
39.05	-8.5144e-11	-2.44458e-10
39.075	-8.819e-11	-2.4889e-10
39.1	-9.0686e-11	-2.46808e-10
39.125	-9.06051e-11	-2.46498e-10
39.15	-9.05026e-11	-2.40715e-10
39.175	-8.89791e-11	-2.43351e-10
39.2	-9.0609e-11	-2.42154e-10
39.225	-9.03825e-11	-2.35872e-10
39.25	-8.86359e-11	-2.42025e-10
39.275	-8.80143e-11	-2.43773e-10
39.3	-8.41014e-11	-2.47981e-10
39.325	-8.12157e-11	-2.35313e-10
39.35	-8.80928e-11	-2.35558e-10
39.375	-8.70279e-11	-2.33734e-10
39.4	-8.65708e-11	-2.34175e-10
39.425	-8.51508e-11	-2.40811e-10
39.45	-9.09182e-11	-2.36441e-10
39.475	-8.58955e-11	-2.38627e-10
39.5	-8.46007e-11	-2.39379e-10
39.525	-8.81839e-11	-2.36916e-10
39.55	-9.30066e-11	-2.25184e-10
39.575	-9.44155e-11	-2.31939e-10
39.6	-8.61054e-11	-2.32351e-10
39.625	-8.64088e-11	-2.3597e-10
39.65	-8.94398e-11	-2.26668e-10
39.675	-9.35887e-11	-2.4148e-10
39.7	-8.51423e-11	-2.36152e-10
39.725	-8.72549e-11	-2.33415e-10
39.75	-8.98381e-11	-2.22515e-10
39.775	-1.00233e-10	-2.33629e-10
39.8	-9.17426e-11	-2.37374e-10
39.825	-8.81157e-11	-2.35847e-10
39.85	-8.78495e-11	-2.29756e-10
39.875	-9.20619e-11	-2.34653e-10
39.9	-9.13141e-11	-2.38935e-10
39.925	-8.86061e-11	-2.39325e-10
39.95	-8.67169e-11	-2.36377e-10
39.975	-8.51492e-11	-2.36415e-10
40	-9.14232e-11	-2.34659e-10
40.025	-9.40891e-11	-2.38695e-10
40.05	-9.33639e-11	-2.4069e-10
40.075	-9.07112e-11	-2.392e-10
40.1	-8.9045e-11	-2.37086e-10
40.125	-8.81629e-11	-2.3489e-10
40.15	-8.80873e-11	-2.40161e-10
40.175	-8.77214e-11	-2.44765e-10
40.2	-8.55454e-11	-2.40437e-10
40.225	-8.30642e-11	-2.43695e-10
40.25	-8.71564e-11	-2.44352e-10
40.275	-8.86179e-11	-2.50453e-10
40.3	-9.12051e-11	-2.50132e-10
40.325	-9.0027e-11	-2.4311e-10
40.35	-8.61897e-11	-2.35092e-10
40.375	-8.78306e-11	-2.39282e-10
40.4	-8.93002e-11	-2.41621e-10
40.425	-8.78885e-11	-2.37943e-10
40.45	-9.16513e-11	-2.3228e-10
40.475	-9.05454e-11	-2.36237e-10
40.5	-8.6925e-11	-2.40805e-10
40.525	-8.71569e-11	-2.38896e-10
40.55	-8.63491e-11	-2.37442e-10
40.575	-8.02241e-11	-2.37875e-10
40.6	-8.30115e-11	-2.40146e-10
40.625	-8.16801e-11	-2.37373e-10
40.65	-8.34022e-11	-2.41797e-10
40.675	-7.9606e-11	-2.38611e-10
40.7	-8.81994e-11	-2.46408e-10
40.725	-8.9997e-11	-2.42813e-10
40.75	-9.32897e-11	-2.41863e-10
40.775	-8.48664e-11	-2.41088e-10
40.8	-8.70538e-11	-2.44186e-10
40.825	-9.30886e-11	-2.42337e-10
40.85	-9.28957e-11	-2.36578e-10
40.875	-8.53309e-11	-2.36751e-10
40.9	-8.05148e-11	-2.36839e-10
40.925	-8.66365e-11	-2.38804e-10
40.95	-8.73964e-11	-2.33137e-10
40.975	-8.8703e-11	-2.28836e-10
41	-8.32993e-11	-2.27697e-10
41.025	-8.86747e-11	-2.32381e-10
41.05	-9.08766e-11	-2.36359e-10
41.075	-9.28408e-11	-2.3521e-10
41.1	-8.86645e-11	-2.36921e-10
41.125	-9.46598e-11	-2.38418e-10
41.15	-9.40699e-11	-2.41643e-10
41.175	-9.07963e-11	-2.40264e-10
41.2	-8.89161e-11	-2.43866e-10
41.225	-9.07518e-11	-2.38798e-10
41.25	-9.21469e-11	-2.37546e-10
41.275	-9.25989e-11	-2.41675e-10
41.3	-8.49902e-11	-2.46191e-10
41.325	-8.42028e-11	-2.45463e-10
41.35	-8.60506e-11	-2.39975e-10
41.375	-8.52494e-11	-2.41021e-10
41.4	-8.49457e-11	-2.41414e-10
41.425	-8.7361e-11	-2.4094e-10
41.45	-8.30957e-11	-2.36569e-10
41.475	-8.57769e-11	-2.3746e-10
41.5	-8.42567e-11	-2.38144e-10
41.525	-9.23218e-11	-2.36459e-10
41.55	-8.00426e-11	-2.36813e-10
41.575	-8.35935e-11	-2.38653e-10
41.6	-8.40689e-11	-2.39392e-10
41.625	-9.31607e-11	-2.35022e-10
41.65	-8.37201e-11	-2.33182e-10
41.675	-8.65193e-11	-2.28516e-10
41.7	-8.40517e-11	-2.34208e-10
41.725	-9.16609e-11	-2.34751e-10
41.75	-8.26322e-11	-2.35458e-10
41.775	-8.33145e-11	-2.34243e-10
41.8	-8.47392e-11	-2.34442e-10
41.825	-8.88702e-11	-2.34057e-10
41.85	-8.55391e-11	-2.32849e-10
41.875	-9.09717e-11	-2.2996e-10
41.9	-9.09217e-11	-2.30931e-10
41.925	-8.88634e-11	-2.33523e-10
41.95	-8.63143e-11	-2.34574e-10
41.975	-8.3063e-11	-2.29114e-10
42	-8.29242e-11	-2.36934e-10
42.025	-8.09856e-11	-2.34956e-10
42.05	-8.64693e-11	-2.36843e-10
42.075	-8.29008e-11	-2.37884e-10
42.1	-8.04929e-11	-2.33325e-10
42.125	-8.14644e-11	-2.2451e-10
42.15	-8.28961e-11	-2.29548e-10
42.175	-8.22686e-11	-2.31801e-10
42.2	-8.12176e-11	-2.32803e-10
42.225	-8.18302e-11	-2.26617e-10
42.25	-7.94969e-11	-2.32075e-10
42.275	-8.38467e-11	-2.34883e-10
42.3	-8.63539e-11	-2.33347e-10
42.325	-8.38362e-11	-2.31909e-10
42.35	-8.45785e-11	-2.30348e-10
42.375	-8.1024e-11	-2.35838e-10
42.4	-8.3522e-11	-2.36093e-10
42.425	-8.27407e-11	-2.36497e-10
42.45	-7.90357e-11	-2.29818e-10
42.475	-8.48204e-11	-2.38749e-10
42.5	-8.5737e-11	-2.39448e-10
42.525	-8.32214e-11	-2.40794e-10
42.55	-8.40591e-11	-2.37197e-10
42.575	-8.14393e-11	-2.40259e-10
42.6	-8.3929e-11	-2.39918e-10
42.625	-8.1088e-11	-2.42741e-10
42.65	-8.36686e-11	-2.43423e-10
42.675	-8.16058e-11	-2.40723e-10
42.7	-8.65621e-11	-2.40584e-10
42.725	-8.28659e-11	-2.43309e-10
42.75	-8.14586e-11	-2.39958e-10
42.775	-7.97946e-11	-2.35872e-10
42.8	-7.78521e-11	-2.33012e-10
42.825	-7.79984e-11	-2.37636e-10
42.85	-7.34052e-11	-2.34951e-10
42.875	-7.66769e-11	-2.37778e-10
42.9	-7.77349e-11	-2.39282e-10
42.925	-8.17127e-11	-2.4049e-10
42.95	-7.62044e-11	-2.40076e-10
42.975	-8.64298e-11	-2.4177e-10
43	-8.55899e-11	-2.42994e-10
43.025	-8.36444e-11	-2.40896e-10
43.05	-7.57844e-11	-2.40115e-10
43.075	-8.2352e-11	-2.48903e-10
43.1	-8.7886e-11	-2.42277e-10
43.125	-8.3834e-11	-2.42674e-10
43.15	-7.69356e-11	-2.43503e-10
43.175	-8.03623e-11	-2.54491e-10
43.2	-8.63421e-11	-2.46143e-10
43.225	-8.3793e-11	-2.43236e-10
43.25	-7.79484e-11	-2.44966e-10
43.275	-8.27476e-11	-2.51571e-10
43.3	-8.93155e-11	-2.4571e-10
43.325	-8.38155e-11	-2.31833e-10
43.35	-8.47419e-11	-2.35607e-10
43.375	-8.32257e-11	-2.38356e-10
43.4	-8.33725e-11	-2.40158e-10
43.425	-8.67311e-11	-2.39122e-10
43.45	-8.66419e-11	-2.40286e-10
43.475	-8.66868e-11	-2.37608e-10
43.5	-8.82215e-11	-2.36342e-10
43.525	-8.36334e-11	-2.36705e-10
43.55	-8.6871e-11	-2.40919e-10
43.575	-8.71207e-11	-2.43385e-10
43.6	-8.78591e-11	-2.42178e-10
43.625	-8.59549e-11	-2.34646e-10
43.65	-8.22879e-11	-2.3688e-10
43.675	-8.96174e-11	-2.41302e-10
43.7	-8.97806e-11	-2.38627e-10
43.725	-8.52507e-11	-2.37856e-10
43.75	-8.30223e-11	-2.36845e-10
43.775	-8.62789e-11	-2.35845e-10
43.8	-8.71888e-11	-2.35493e-10
43.825	-8.74407e-11	-2.34067e-10
43.85	-9.296e-11	-2.34035e-10
43.875	-9.05986e-11	-2.3057e-10
43.9	-9.10986e-11	-2.32682e-10
43.925	-8.61286e-11	-2.30776e-10
43.95	-8.509e-11	-2.24621e-10
43.975	-8.50858e-11	-2.25111e-10
44	-9.12488e-11	-2.293e-10
44.025	-8.21147e-11	-2.32263e-10
44.05	-8.17445e-11	-2.30045e-10
44.075	-7.99552e-11	-2.31966e-10
44.1	-8.80558e-11	-2.31209e-10
44.125	-8.24289e-11	-2.32738e-10
44.15	-8.46327e-11	-2.35376e-10
44.175	-8.85293e-11	-2.38017e-10
44.2	-8.28979e-11	-2.37323e-10
44.225	-8.54051e-11	-2.36369e-10
44.25	-8.50901e-11	-2.36488e-10
44.275	-8.70752e-11	-2.36681e-10
44.3	-9.05354e-11	-2.30253e-10
44.325	-8.68402e-11	-2.30412e-10
44.35	-8.58347e-11	-2.29295e-10
44.375	-8.0845e-11	-2.28522e-10
44.4	-8.59863e-11	-2.2261e-10
44.425	-8.50829e-11	-2.21524e-10
44.45	-8.33847e-11	-2.21557e-10
44.475	-8.54066e-11	-2.26175e-10
44.5	-8.47864e-11	-2.16124e-10
44.525	-8.7959e-11	-2.29493e-10
44.55	-8.72793e-11	-2.31627e-10
44.575	-8.66839e-11	-2.32154e-10
44.6	-8.40469e-11	-2.27403e-10
44.625	-8.40049e-11	-2.3142e-10
44.65	-8.79727e-11	-2.28539e-10
44.675	-8.30967e-11	-2.2816e-10
44.7	-7.84426e-11	-2.16872e-10
44.725	-7.67207e-11	-2.17846e-10
44.75	-8.24108e-11	-2.23818e-10
44.775	-8.3138e-11	-2.24797e-10
44.8	-8.14622e-11	-2.22217e-10
44.825	-8.34741e-11	-2.15509e-10
44.85	-7.9851e-11	-2.20465e-10
44.875	-7.71825e-11	-2.21541e-10
44.9	-7.51216e-11	-2.19771e-10
44.925	-7.95514e-11	-2.23081e-10
44.95	-8.27149e-11	-2.24237e-10
44.975	-8.0345e-11	-2.18655e-10
45	-8.02657e-11	-2.19704e-10
45.025	-7.93977e-11	-2.18721e-10
45.05	-8.12363e-11	-2.27226e-10
45.075	-8.24362e-11	-2.29099e-10
45.1	-7.92601e-11	-2.30037e-10
45.125	-7.73458e-11	-2.29982e-10
45.15	-7.95073e-11	-2.28149e-10
45.175	-8.51057e-11	-2.22759e-10
45.2	-8.22502e-11	-2.21726e-10
45.225	-7.54153e-11	-2.229e-10
45.25	-8.72378e-11	-2.3266e-10
45.275	-8.59263e-11	-2.31369e-10
45.3	-8.1713e-11	-2.23492e-10
45.325	-7.45774e-11	-2.27801e-10
45.35	-8.72868e-11	-2.33278e-10
45.375	-8.52406e-11	-2.27678e-10
45.4	-8.81971e-11	-2.239e-10
45.425	-8.19961e-11	-2.20819e-10
45.45	-7.97217e-11	-2.32904e-10
45.475	-7.98223e-11	-2.23223e-10
45.5	-8.15227e-11	-2.21122e-10
45.525	-7.70782e-11	-2.15684e-10
45.55	-7.4454e-11	-2.24875e-10
45.575	-7.65496e-11	-2.22101e-10
45.6	-7.70968e-11	-2.22906e-10
45.625	-7.48157e-11	-2.18655e-10
45.65	-7.61598e-11	-2.21707e-10
45.675	-8.19384e-11	-2.21655e-10
45.7	-8.07949e-11	-2.22522e-10
45.725	-8.25418e-11	-2.24379e-10
45.75	-8.1752e-11	-2.23988e-10
45.775	-8.50947e-11	-2.2912e-10
45.8	-8.42553e-11	-2.25979e-10
45.825	-7.98641e-11	-2.19635e-10
45.85	-8.02321e-11	-2.24658e-10
45.875	-8.05438e-11	-2.23395e-10
45.9	-7.9972e-11	-2.23377e-10
45.925	-8.34889e-11	-2.23479e-10
45.95	-9.15596e-11	-2.27783e-10
45.975	-8.17305e-11	-2.25614e-10
46	-7.77873e-11	-2.23745e-10
46.025	-7.61633e-11	-2.19388e-10
46.05	-8.11466e-11	-2.22431e-10
46.075	-7.9506e-11	-2.22607e-10
46.1	-7.7818e-11	-2.26265e-10
46.125	-7.26855e-11	-2.31363e-10
46.15	-8.18112e-11	-2.2619e-10
46.175	-8.16915e-11	-2.26536e-10
46.2	-7.67451e-11	-2.31918e-10
46.225	-8.07829e-11	-2.29423e-10
46.25	-7.90835e-11	-2.29537e-10
46.275	-7.91209e-11	-2.2466e-10
46.3	-7.64739e-11	-2.29062e-10
46.325	-7.88229e-11	-2.27196e-10
46.35	-7.70445e-11	-2.28333e-10
46.375	-7.83532e-11	-2.3028e-10
46.4	-7.75635e-11	-2.31606e-10
46.425	-8.14698e-11	-2.31852e-10
46.45	-8.24621e-11	-2.28209e-10
46.475	-8.21827e-11	-2.30127e-10
46.5	-7.83837e-11	-2.33783e-10
46.525	-7.39287e-11	-2.25855e-10
46.55	-7.68656e-11	-2.27744e-10
46.575	-7.98459e-11	-2.2708e-10
46.6	-7.79214e-11	-2.3166e-10
46.625	-7.76327e-11	-2.27242e-10
46.65	-7.73184e-11	-2.22417e-10
46.675	-7.40628e-11	-2.12864e-10
46.7	-7.64624e-11	-2.22522e-10
46.725	-8.02244e-11	-2.23111e-10
46.75	-8.1971e-11	-2.23895e-10
46.775	-8.04748e-11	-2.16307e-10
46.8	-7.31681e-11	-2.28508e-10
46.825	-7.34451e-11	-2.26e-10
46.85	-7.4684e-11	-2.29298e-10
46.875	-7.48587e-11	-2.21445e-10
46.9	-7.51243e-11	-2.25418e-10
46.925	-7.6502e-11	-2.2906e-10
46.95	-7.84422e-11	-2.3031e-10
46.975	-7.48093e-11	-2.24731e-10
47	-7.96139e-11	-2.25515e-10
47.025	-7.81784e-11	-2.35885e-10
47.05	-8.23291e-11	-2.37247e-10
47.075	-7.83267e-11	-2.32189e-10
47.1	-8.33198e-11	-2.30289e-10
47.125	-8.50768e-11	-2.28139e-10
47.15	-8.43884e-11	-2.26334e-10
47.175	-8.06655e-11	-2.25189e-10
47.2	-8.22834e-11	-2.29601e-10
47.225	-8.26913e-11	-2.29262e-10
47.25	-8.16054e-11	-2.29814e-10
47.275	-7.53122e-11	-2.2487e-10
47.3	-8.28858e-11	-2.23547e-10
47.325	-8.26292e-11	-2.27007e-10
47.35	-8.04457e-11	-2.28734e-10
47.375	-7.23269e-11	-2.23984e-10
47.4	-7.76251e-11	-2.22912e-10
47.425	-8.4709e-11	-2.28746e-10
47.45	-8.43392e-11	-2.25287e-10
47.475	-7.52738e-11	-2.23755e-10
47.5	-7.44471e-11	-2.27642e-10
47.525	-8.75966e-11	-2.24686e-10
47.55	-8.04684e-11	-2.22251e-10
47.575	-8.17993e-11	-2.17338e-10
47.6	-8.45206e-11	-2.23742e-10
47.625	-7.74991e-11	-2.28017e-10
47.65	-7.33999e-11	-2.22556e-10
47.675	-7.80594e-11	-2.27664e-10
47.7	-7.49249e-11	-2.29238e-10
47.725	-7.57244e-11	-2.32827e-10
47.75	-7.59614e-11	-2.24748e-10
47.775	-8.07151e-11	-2.25979e-10
47.8	-8.28221e-11	-2.27356e-10
47.825	-8.46926e-11	-2.40147e-10
47.85	-8.54235e-11	-2.32351e-10
47.875	-8.35732e-11	-2.31722e-10
47.9	-8.27869e-11	-2.28036e-10
47.925	-7.93783e-11	-2.35255e-10
47.95	-8.28015e-11	-2.30507e-10
47.975	-8.24463e-11	-2.33207e-10
48	-8.12742e-11	-2.31023e-10
48.025	-8.32253e-11	-2.39537e-10
48.05	-7.8715e-11	-2.35281e-10
48.075	-7.9754e-11	-2.3563e-10
48.1	-8.19861e-11	-2.34208e-10
48.125	-8.8196e-11	-2.36397e-10
48.15	-8.0797e-11	-2.33018e-10
48.175	-8.293e-11	-2.33158e-10
48.2	-8.47037e-11	-2.3069e-10
48.225	-9.06326e-11	-2.28638e-10
48.25	-7.96248e-11	-2.26759e-10
48.275	-7.95654e-11	-2.30206e-10
48.3	-7.94592e-11	-2.30871e-10
48.325	-8.54026e-11	-2.28943e-10
48.35	-8.09698e-11	-2.28521e-10
48.375	-7.63753e-11	-2.28146e-10
48.4	-7.35686e-11	-2.25756e-10
48.425	-7.97681e-11	-2.28864e-10
48.45	-8.33471e-11	-2.25321e-10
48.475	-7.82349e-11	-2.23925e-10
48.5	-7.64318e-11	-2.24249e-10
48.525	-7.86366e-11	-2.31382e-10
48.55	-8.00011e-11	-2.29594e-10
48.575	-7.60685e-11	-2.28354e-10
48.6	-7.75222e-11	-2.26566e-10
48.625	-8.18017e-11	-2.28392e-10
48.65	-7.8359e-11	-2.28735e-10
48.675	-7.60152e-11	-2.28518e-10
48.7	-7.74312e-11	-2.30348e-10
48.725	-7.7212e-11	-2.27184e-10
48.75	-7.73379e-11	-2.22057e-10
48.775	-8.09856e-11	-2.26648e-10
48.8	-8.10652e-11	-2.25729e-10
48.825	-7.99572e-11	-2.26431e-10
48.85	-7.59815e-11	-2.25932e-10
48.875	-7.30048e-11	-2.26305e-10
48.9	-7.30722e-11	-2.28821e-10
48.925	-7.44069e-11	-2.27795e-10
48.95	-7.64801e-11	-2.24763e-10
48.975	-8.01782e-11	-2.25899e-10
49	-8.43327e-11	-2.276e-10
49.025	-8.02324e-11	-2.27171e-10
49.05	-8.26631e-11	-2.14363e-10
49.075	-8.59232e-11	-2.26118e-10
49.1	-8.36412e-11	-2.2608e-10
49.125	-7.98261e-11	-2.26536e-10
49.15	-8.01623e-11	-2.1652e-10
49.175	-8.12316e-11	-2.25329e-10
49.2	-8.41657e-11	-2.28821e-10
49.225	-7.93912e-11	-2.31743e-10
49.25	-7.32391e-11	-2.19848e-10
49.275	-7.70688e-11	-2.30695e-10
49.3	-7.94146e-11	-2.28552e-10
49.325	-7.46242e-11	-2.28815e-10
49.35	-7.352e-11	-2.2271e-10
49.375	-7.86392e-11	-2.26133e-10
49.4	-8.15163e-11	-2.29668e-10
49.425	-7.75988e-11	-2.28883e-10
49.45	-7.10562e-11	-2.21391e-10
49.475	-7.40692e-11	-2.24131e-10
49.5	-7.34788e-11	-2.26976e-10
49.525	-7.04821e-11	-2.26363e-10
49.55	-6.55324e-11	-2.23123e-10
49.575	-7.52758e-11	-2.26597e-10
49.6	-7.07425e-11	-2.23559e-10
49.625	-7.34869e-11	-2.24897e-10
49.65	-6.66927e-11	-2.25924e-10
49.675	-7.18115e-11	-2.28741e-10
49.7	-7.3978e-11	-2.22136e-10
49.725	-7.58086e-11	-2.23081e-10
49.75	-6.80585e-11	-2.22698e-10
49.775	-6.95106e-11	-2.3093e-10
49.8	-7.4279e-11	-2.2429e-10
49.825	-7.07756e-11	-2.19988e-10
49.85	-7.11677e-11	-2.21785e-10
49.875	-7.05508e-11	-2.26388e-10
49.9	-7.23297e-11	-2.26657e-10
49.925	-7.1961e-11	-2.24644e-10
49.95	-7.27815e-11	-2.25268e-10
[truncated: 41 more rows]
