# Supplementary material for: Genetic code expansion, click chemistry, and light-activated PI3K reveal details of membrane protein trafficking downstream of receptor tyrosine kinases
Source: eLife. 2024 Aug 20;12:RP91012. doi: 10.7554/eLife.91012 (PMC11335347; doi:10.7554/eLife.91012)
Supplement: Figure 3—figure supplement 1—source data 2. [file elife-91012-fig3-figsupp1-data2.xlsx]

## Sheet: Sheet1
Analysis of patch clamp data for wt TRPV1-GFP and TRPV1468TAG-GFP
WT
		Current (nA)	Cm (pF)	Current/Cm
2023-07-31	Cell 6	6.1	6.45	0.945736
	Cell 7	5.72	6.23	0.918138
	Cell 13	5.87	9.72	0.603909
	Cell 14	5.37	7.19	0.746871
	Cell 17	5.6	14.38	0.38943
	Cell 18	9.03	32.75	0.275725
2023-08-01	Cell 1	3.34	9.62	0.347193
	Cell 2	8.34	18.17	0.458998
			Mean	0.58575
			SD	0.260218
			Count	8
			SEM	0.0983532
TAG
		Current (nA)	Cm (pF)	Current/Cm
2023-07-31	Cell 4	3.38	8.61	0.392567
	Cell 5	4.21	5.89	0.714771
	Cell 9	0.68	3.65	0.186301
	Cell 10	1.29	8.16	0.158088
	Cell 11	10.1	12.62	0.800317
	Cell 12	3.33	5.82	0.572165
	Cell 15	3.77	13.82	0.272793
	Cell 16	3.68	7.18	0.512535
2023-08-01	Cell 3	0.94	4.84	0.194215
			Mean	0.422639
			SD	0.239739
			Count	9
			SEM	0.0847606
			t-TEST	0.198489
