# Supplementary material for: Genetic code expansion, click chemistry, and light-activated PI3K reveal details of membrane protein trafficking downstream of receptor tyrosine kinases
Source: eLife. 2024 Aug 20;12:RP91012. doi: 10.7554/eLife.91012 (PMC11335347; doi:10.7554/eLife.91012)
Supplement: Figure 3—figure supplement 2—source data 2. [file elife-91012-fig3-figsupp2-data2.xlsx]

## Sheet: pIR endocytosis, eLife
																		T.Test
	Cell 3-1	Cell 3-2	Cell 3-3	Cell 3-4	Cell 1-1	Cell 1-2	Cell 1-3	Cell 1-4	Cell 2-1	Cell 2-2	Cell 2-3	Cell 2-4		Mean	SD	n	SEM	1.18534e-05
Before	0.404237	0.463146	0.462073	0.370045	0.353292	0.327346	0.475654	0.398008	0.494067	0.447419	0.464906	0.439755		0.424996	0.0533739	12	0.0160928
After	0.57471	0.996818	0.917694	0.973234	0.854065	0.906178	0.856869	0.952909	0.709566	0.80698	0.63436	0.554219		0.811467	0.156281	12	0.0471205
