# Supplementary material for: Genetic code expansion, click chemistry, and light-activated PI3K reveal details of membrane protein trafficking downstream of receptor tyrosine kinases
Source: eLife. 2024 Aug 20;12:RP91012. doi: 10.7554/eLife.91012 (PMC11335347; doi:10.7554/eLife.91012)
Supplement: Figure 3—figure supplement 3—source data 2. [file elife-91012-fig3-figsupp3-data2.xlsx]

## Sheet: TAMRA_permeation
Measuring sTCO dyes into HEK cells
sTCO-Tamra (100 nM) Cells transfected with GFP-TAG
9-23-22, Exp 4
GFP (+) cell	GFP (+) cell	GFP (-) cell	GFP (-) cell						Nomalization factor (3 points around 10 min)
Time	Cell 1_GFP+	Cell 2_GFP+	Cell 3_GFP-	Cell 4-GFP-	Cell 5-GFP-	Cell 6-GFP-	Cell 7-GFP-	Cell 8-GFP-										Cell 1_GFP+	Cell 2_GFP+	Cell 3_GFP-	Cell 4-GFP-	Cell 5-GFP-	Cell 6-GFP-	Cell 7-GFP-	Cell 8-GFP-		Mean	SD	Number	SEM
0	1.692	1.073	0.535	0.757	1.197	0.58	1.289	0.685	6.66033	6.454	5.713	7.797	11.6133	6.94233	11.0727	9.65933		0.254054	0.166357	0.0936953	0.0970513	0.103101	0.0835735	0.116441	0.070911		0.123148	0.0601113	8	0.0227199
0.166667	1.538	0.938	0.608	0.617	1.42	0.49	1.133	0.671										0.230931	0.145426	0.10648	0.0791026	0.122308	0.0706052	0.102349	0.0694617		0.115833	0.0534249	8	0.0201927
0.333333	1.406	1.052	0.59	0.559	1.354	0.615	1.038	0.847										0.211111	0.163101	0.103327	0.0716667	0.116624	0.0886167	0.0937669	0.0876812		0.116987	0.0469488	8	0.017745
0.5	1.426	1.044	0.547	0.577	1.332	0.468	1.315	0.833										0.214114	0.16186	0.0957968	0.0739744	0.114729	0.0674352	0.11879	0.0862319		0.116616	0.0495046	8	0.018711
0.666667	1.317	0.903	0.527	0.736	1.152	0.554	1.218	0.883										0.197748	0.14	0.0922942	0.094359	0.0992248	0.0798271	0.110027	0.0914079		0.113111	0.0386422	8	0.0146054
0.833333	1.516	1.088	0.575	0.635	1.245	0.478	1.088	0.925										0.227628	0.168682	0.100701	0.0814103	0.107235	0.0688761	0.0982836	0.0957557		0.118571	0.0529622	8	0.0200178
1	1.266	1.166	0.541	0.583	1.347	0.468	1.131	0.649										0.19009	0.180775	0.0947461	0.0747436	0.116021	0.0674352	0.102168	0.0671843		0.111645	0.0487268	8	0.018417
1.16667	1.365	1.132	0.566	0.786	1.333	0.503	1.06	0.747										0.204955	0.175504	0.0991243	0.100769	0.114815	0.0724784	0.0957543	0.0773292		0.117591	0.0474358	8	0.017929
1.33333	1.293	1.079	0.566	0.843	1.185	0.622	0.946	0.721										0.194144	0.167287	0.0991243	0.108077	0.102067	0.0896254	0.0854562	0.0746377		0.115052	0.0424445	8	0.0160425
1.5	1.459	1.262	0.616	0.678	1.235	0.449	1.002	0.894										0.219069	0.195659	0.107881	0.0869231	0.106374	0.0646974	0.0905149	0.0925466		0.120458	0.0556075	8	0.0210176
1.66667	1.383	1.064	0.513	0.536	1.288	0.609	1.174	0.735										0.207658	0.164961	0.0898424	0.0687179	0.110939	0.0877522	0.106052	0.076087		0.114001	0.0481096	8	0.0181837
1.83333	1.397	1.052	0.582	0.797	1.539	0.651	1.045	0.724										0.20976	0.163101	0.101926	0.102179	0.132558	0.093804	0.0943993	0.0749482		0.121585	0.0448292	8	0.0169439
2	1.439	1.455	1.12	1.809	1.456	1.449	1.402	1.735										0.216066	0.225581	0.196147	0.231923	0.125409	0.20879	0.126649	0.179607		0.188771	0.0420462	8	0.015892
2.16667	1.79	1.332	1.254	2.183	1.693	2.192	1.807	1.911										0.268769	0.206512	0.219615	0.279872	0.145823	0.31585	0.163234	0.197826		0.224687	0.0590072	8	0.0223026
2.33333	1.745	1.534	1.759	2.371	2.572	2.76	2.311	2.362										0.262012	0.237829	0.308056	0.303974	0.221533	0.397695	0.208762	0.244513		0.273047	0.0617385	8	0.023335
2.5	2.094	1.694	1.751	2.513	2.356	3.433	2.388	2.816										0.314414	0.262636	0.306655	0.322179	0.202929	0.494669	0.215718	0.291511		0.301339	0.0899365	8	0.0339928
2.66667	2.097	1.755	1.999	2.664	2.736	3.593	3.469	2.855										0.314865	0.272093	0.350088	0.341538	0.235659	0.517723	0.313369	0.295549		0.330111	0.0842807	8	0.0318551
2.83333	2.437	2.399	1.962	3.386	3.332	3.154	2.991	2.928										0.365916	0.371938	0.343608	0.434103	0.286994	0.454467	0.27019	0.303106		0.35379	0.0667465	8	0.0252278
3	2.541	2.475	1.856	3.212	3.458	3.349	3.394	3.671										0.381532	0.383721	0.325044	0.411795	0.297847	0.482565	0.306594	0.380021		0.37114	0.0610344	8	0.0230688
3.16667	2.754	2.085	2.14	3.467	3.874	4.048	3.917	3.688										0.413514	0.323256	0.374781	0.444487	0.333678	0.583285	0.353839	0.381781		0.401078	0.0837795	8	0.0316657
3.33333	2.48	2.114	2.153	3.061	4.112	3.548	4.452	3.953										0.372372	0.327752	0.377058	0.392436	0.354177	0.511239	0.402168	0.409213		0.393302	0.054473	8	0.0205889
3.5	2.741	2.508	2.253	3.588	4.556	4.096	4.298	3.738										0.411562	0.388837	0.394571	0.46	0.39242	0.590202	0.388257	0.386957		0.426601	0.0704772	8	0.0266379
3.66667	3.187	2.699	2.173	3.023	3.976	3.933	4.259	3.621										0.478529	0.41845	0.38056	0.387564	0.342463	0.566715	0.384734	0.374845		0.416732	0.0724766	8	0.0273936
3.83333	3.282	2.581	2.427	3.586	4.541	3.763	5.191	3.632										0.492793	0.400155	0.425044	0.459744	0.391128	0.542219	0.468925	0.375983		0.444499	0.0568183	8	0.0214753
4	3.455	2.583	2.416	3.614	4.307	3.913	5.133	3.49										0.518769	0.400465	0.423117	0.463333	0.370973	0.563833	0.463686	0.361284		0.445682	0.0709076	8	0.0268005
4.16667	3.365	2.985	2.474	4.154	5	4.215	4.647	4.209										0.505255	0.462791	0.433275	0.532564	0.430663	0.607349	0.419783	0.435714		0.478424	0.0655738	8	0.0247846
4.33333	3.638	2.543	2.729	3.829	4.936	4.099	5.478	3.981										0.546246	0.394264	0.477933	0.490897	0.425151	0.590634	0.494851	0.412112		0.479011	0.0675407	8	0.025528
4.5	4.011	2.983	2.381	4.359	5.098	3.795	5.351	4.579										0.602252	0.462481	0.416988	0.558846	0.439104	0.54683	0.483379	0.474017		0.497987	0.0644066	8	0.0243434
4.66667	3.833	2.985	2.537	4.203	5.618	4.397	6.06	5.652										0.575526	0.462791	0.444308	0.538846	0.483893	0.633573	0.547425	0.585093		0.533932	0.0655521	8	0.0247764
4.83333	3.871	3.172	2.968	4.377	5.444	4.635	5.814	5.337										0.581231	0.491783	0.51979	0.561154	0.468906	0.667867	0.525203	0.552484		0.546052	0.0613736	8	0.023197
5	3.781	3.288	3.04	4.357	5.877	4.452	6.518	5.014										0.567718	0.509767	0.532399	0.55859	0.506202	0.641499	0.588799	0.519048		0.553003	0.0462874	8	0.017495
5.16667	3.721	3.463	3.34	4.748	5.953	5.429	6.859	5.432										0.558709	0.536899	0.584939	0.608718	0.512748	0.782277	0.619603	0.562319		0.595776	0.0832283	8	0.0314574
5.33333	3.919	3.545	3.251	4.394	6.276	5.699	6.73	5.437										0.588438	0.549612	0.569352	0.563333	0.540568	0.821182	0.607949	0.562836		0.600409	0.0916926	8	0.0346565
5.5	4.399	3.518	3.196	4.951	6.38	5.923	6.492	6.287										0.660511	0.545426	0.55972	0.634744	0.549526	0.853458	0.58645	0.650828		0.630083	0.101267	8	0.0382754
5.66667	4.397	3.431	3.56	4.394	6.544	5.356	7.951	6.198										0.66021	0.531938	0.623468	0.563333	0.563652	0.771758	0.718248	0.641615		0.634278	0.0821927	8	0.0310659
5.83333	4.358	3.903	3.767	4.942	6.846	5.628	7.454	5.738										0.654354	0.605116	0.65972	0.63359	0.589664	0.810951	0.673351	0.593996		0.652593	0.071285	8	0.0269432
6	4.514	3.451	3.774	5.101	7.174	5.699	7.418	6.203										0.677778	0.535039	0.660946	0.653974	0.617916	0.821182	0.670099	0.642133		0.659883	0.0794088	8	0.0300137
6.16667	4.232	3.434	4.012	4.948	7.359	5.837	7.998	6.195										0.635435	0.532403	0.702627	0.634359	0.63385	0.841066	0.722493	0.641304		0.667942	0.0899031	8	0.0339802
6.33333	4.721	3.781	4.359	5.42	7.223	4.926	7.445	6.27										0.708859	0.586202	0.763398	0.694872	0.622136	0.709798	0.672538	0.649068		0.675859	0.0559575	8	0.02115
6.5	4.977	3.933	3.747	5.174	7.876	4.728	8.78	6.373										0.747297	0.609767	0.656217	0.663333	0.678381	0.681268	0.793135	0.659731		0.686141	0.0575918	8	0.0217677
6.66667	4.921	3.924	4.364	5.023	7.496	5.619	8.445	6.967										0.738889	0.608372	0.764273	0.643974	0.64565	0.809654	0.762873	0.721222		0.711863	0.071147	8	0.026891
6.83333	5.099	4.02	4.737	5.003	7.853	5.151	8.803	6.978										0.765616	0.623256	0.829597	0.64141	0.6764	0.742219	0.795212	0.72236		0.724509	0.0732146	8	0.0276725
7	5.486	3.9	4.538	5.907	8	5.571	9.205	7.265										0.823724	0.604651	0.794746	0.757308	0.689061	0.802738	0.831527	0.75207		0.756978	0.0768795	8	0.0290577
7.16667	5.101	4.132	4.307	5.128	8.53	6.071	9.208	7.128										0.765916	0.64062	0.754291	0.657436	0.734711	0.874784	0.831798	0.737888		0.74968	0.0787811	8	0.0297765
7.33333	5.317	3.974	4.513	5.649	8.57	5.487	8.764	7.844										0.798348	0.616124	0.790368	0.724231	0.738157	0.790634	0.791689	0.812008		0.757695	0.0648676	8	0.0245177
7.5	5.39	4.416	4.447	5.736	9.694	4.962	9.403	7.518										0.809309	0.684651	0.778809	0.735385	0.83497	0.714986	0.849413	0.778261		0.773223	0.0581189	8	0.0219669
7.66667	6.034	4.556	4.877	5.977	8.957	5.385	8.764	7.292										0.906006	0.706357	0.854116	0.766282	0.77149	0.775937	0.791689	0.754865		0.790843	0.0619896	8	0.0234299
7.83333	5.106	5.137	4.866	5.412	9.665	6.093	8.822	8.24										0.766667	0.796434	0.852189	0.693846	0.832472	0.877954	0.796929	0.853002		0.808687	0.0591154	8	0.0223435
8	6.043	5.333	5.224	6.061	8.815	5.631	9.576	9.563										0.907357	0.826822	0.914886	0.777051	0.759259	0.811383	0.865041	0.989959		0.85647	0.0779778	8	0.0294728
8.16667	6.027	5.274	5.138	6.22	9.991	6.038	9.501	8.538										0.904955	0.817674	0.899825	0.797436	0.860551	0.870029	0.858266	0.883851		0.861573	0.0377315	8	0.0142612
8.33333	5.466	5.4	5.412	6.342	9.998	5.715	9.764	8.694										0.820721	0.837209	0.947811	0.813077	0.861154	0.823487	0.882023	0.9		0.860685	0.0468898	8	0.0177227
8.5	6.068	5.647	5.306	6.528	9.751	6.061	9.362	8.253										0.911111	0.875504	0.929247	0.836923	0.839879	0.873343	0.845709	0.854348		0.870758	0.0339612	8	0.0128361
8.66667	6.124	6.508	5.53	6.707	10.233	5.519	10.064	9.337										0.91952	1.00899	0.968476	0.859872	0.881395	0.795245	0.909124	0.966563		0.913648	0.0685597	8	0.0259131
8.83334	6.396	5.887	5.58	7.104	10.116	6.061	9.388	8.357										0.96036	0.912713	0.977233	0.910769	0.871318	0.873343	0.848058	0.865114		0.902364	0.0467356	8	0.0176644
9	6.388	6.026	5.722	7.67	10.912	6.593	10.741	9.423										0.959159	0.934264	1.0021	0.983333	0.939879	0.95	0.97028	0.975466		0.96431	0.022932	8	0.00866748
9.16667	6.559	6.591	5.385	7.464	10.805	6.426	9.535	9.376										0.984835	1.02186	0.943082	0.956923	0.930663	0.925937	0.861337	0.9706		0.949405	0.0473721	8	0.017905
9.33334	6.568	6.149	5.682	7.513	10.945	6.59	9.962	10.351										0.986186	0.953333	0.995096	0.963205	0.942722	0.949568	0.89991	1.07153		0.970194	0.0501405	8	0.0189513
9.5	6.293	5.484	5.397	7.986	11.266	5.929	10.4	9.359										0.944895	0.850233	0.945184	1.02385	0.97037	0.854323	0.939476	0.968841		0.937146	0.0587598	8	0.0222091
9.66667	6.507	5.703	5.787	7.901	11.092	6.715	10.195	9.515										0.977027	0.884186	1.01349	1.01295	0.955383	0.967579	0.920958	0.98499		0.96457	0.0443403	8	0.016759
9.83334	6.252	6.205	5.635	7.116	11.116	6.936	10.891	9.27										0.938739	0.962016	0.986865	0.912308	0.95745	0.999424	0.98383	0.959627		0.962532	0.0281065	8	0.0106233
10	6.93	6.443	5.642	8.478	11.857	6.676	10.987	9.903										1.04054	0.998915	0.988091	1.08692	1.02127	0.96196	0.992502	1.02516		1.01442	0.0382983	8	0.0144754
10.1667	6.799	6.714	5.862	7.797	11.867	7.215	11.34	9.805										1.02087	1.04093	1.02662	0.999615	1.02214	1.03963	1.02439	1.01501		1.02365	0.0132315	8	0.00500104
10.3333	6.748	6.936	5.738	8.081	12.52	7.026	11.12	10.315										1.01321	1.07535	1.0049	1.03603	1.07838	1.01239	1.00452	1.06781		1.03657	0.0324877	8	0.0122792
10.5	6.629	6.562	5.582	7.145	12.017	6.119	10.946	9.106										0.995345	1.01736	0.977583	0.916026	1.03506	0.8817	0.988799	0.94265		0.969315	0.0520759	8	0.0196828
10.6667	6.59	5.927	5.424	7.13	11.636	5.952	12.276	9.357										0.989489	0.918915	0.949912	0.914103	1.00224	0.857637	1.10894	0.968634		0.963734	0.0748096	8	0.0282754
10.8333	6.612	6.07	5.208	6.406	11.449	6.487	11.664	9.702										0.992793	0.941085	0.912084	0.821282	0.986133	0.934726	1.05366	1.00435		0.955764	0.070598	8	0.0266835
11	6.772	6.107	5.813	6.988	12.131	6.263	11.227	9.379										1.01682	0.946822	1.01804	0.895897	1.04488	0.90245	1.01418	0.970911		0.976249	0.0564899	8	0.0213512
11.1667	6.505	5.963	5.779	7.101	11.145	5.599	11.338	9.117										0.976727	0.924496	1.01208	0.910385	0.959948	0.806772	1.02421	0.943789		0.944801	0.0683804	8	0.0258454
11.3333	6.692	5.982	5.378	6.959	12.138	5.974	10.75	9.593										1.0048	0.927442	0.941856	0.892179	1.04548	0.860807	0.971093	0.993064		0.954591	0.0610904	8	0.02309
11.5	6.439	5.693	5.299	6.206	11.805	5.99	11.105	9.251										0.966817	0.882636	0.928021	0.795641	1.0168	0.863112	1.00316	0.95766		0.926731	0.075304	8	0.0284622
11.6667	6.522	5.694	5.03	5.809	10.591	5.426	10.75	8.738										0.979279	0.882791	0.880911	0.744744	0.912231	0.781844	0.971093	0.904555		0.882181	0.0825448	8	0.031199
11.8333	6.601	5.842	5.145	5.687	10.965	5.987	10.189	8.852										0.991141	0.905736	0.901051	0.729103	0.944444	0.86268	0.920416	0.916356		0.896366	0.0769911	8	0.0290999
12	5.928	5.709	5.057	5.771	10.813	5.487	10.071	8.735										0.89009	0.885116	0.885639	0.739872	0.931352	0.790634	0.909756	0.904244		0.867088	0.0660719	8	0.0249728
12.1667	6.291	5.533	5.34	6.226	10.622	5.282	10.865	8.123										0.944595	0.857829	0.935201	0.798205	0.914901	0.761095	0.981481	0.84089		0.879275	0.0770732	8	0.0291309
12.3333	6.714	6.029	5.339	6.171	10.596	5.048	10.266	8.033										1.00811	0.934729	0.935026	0.791154	0.912661	0.727378	0.927371	0.831573		0.8835	0.0919472	8	0.0347528
12.5	6.304	5.939	5.186	5.362	10.288	5.16	9.777	9.674										0.946547	0.920775	0.908231	0.687436	0.886133	0.743516	0.883198	1.00145		0.872161	0.104815	8	0.0396163
12.6667	6.612	5.248	5.067	5.748	11.107	5.76	10.255	9.134										0.992793	0.813643	0.887391	0.736923	0.956675	0.829971	0.926378	0.945549		0.886165	0.0863353	8	0.0326317
12.8333	6.241	5.192	5.204	5.71	11.347	5.429	9.867	8.334										0.937087	0.804961	0.911384	0.732051	0.977347	0.782277	0.891328	0.862733		0.862396	0.0834412	8	0.0315378
13	6.083	5.454	4.853	5.53	10.516	5.256	9.574	8.265										0.913363	0.845581	0.849912	0.708974	0.905771	0.757349	0.86486	0.85559		0.837675	0.0703605	8	0.0265938
13.1667	5.871	5.39	5.135	5.464	10.634	4.84	8.934	8.493										0.881532	0.835659	0.899299	0.700513	0.915935	0.697406	0.807046	0.879193		0.827073	0.0862728	8	0.032608
13.3333	6.103	4.665	4.533	5.887	9.838	5.625	8.91	9.128										0.916366	0.723256	0.79387	0.754744	0.847373	0.810519	0.804878	0.944928		0.824492	0.0756877	8	0.0286073
13.5	6.25	4.973	4.405	5.713	10.434	5.404	9.103	8.028										0.938438	0.771008	0.771454	0.732436	0.898708	0.778674	0.822313	0.831056		0.818011	0.0701537	8	0.0265156
13.6667	5.709	5.046	4.355	5.716	10.364	5.276	8.523	7.599										0.857207	0.782326	0.762697	0.732821	0.892679	0.760231	0.769919	0.786646		0.793066	0.05393	8	0.0203836
13.8333	6.39	5.673	4.379	6.641	9.484	4.962	9.574	7.666										0.959459	0.879535	0.7669	0.85141	0.816882	0.714986	0.86486	0.793582		0.830952	0.0752027	8	0.0284239

## Sheet: Sulfo-Cy5_Permeation
Measuring sTCO dyes into HEK cells
Cytosolic	GFP+ cells
sTCO-sulfo-Cy5 (100 and 1 uM)
9-30-22, Exp Cell 1, 2, 3										Nomalization factor (3 points around 10 min)									Corrected									Nomalization factor									Normalized to the peaks of F(outside) of the exp
	Exp Cell 1			Exp Cell 2		Exp Cell 3				Exp Cell 1			Exp Cell 2		Exp Cell 3				Exp Cell 1			Exp Cell 2		Exp Cell 3				Exp Cell 1			Exp Cell 2		Exp Cell 3				Exp Cell 1			Exp Cell 2		Exp Cell 3
Time	Cell 1	Cell 2	Cell 3	Cell 1	Cell 2	Cell 1	Cell 2	Cell 3		Cell 1	Cell 2	Cell 3	Cell 1	Cell 2	Cell 1	Cell 2	Cell 3		Cell 1	Cell 2	Cell 3	Cell 1	Cell 2	Cell 1	Cell 2	Cell 3		Cell 1	Cell 2	Cell 3	Cell 1	Cell 2	Cell 1	Cell 2	Cell 3		Cell 1	Cell 2	Cell 3	Cell 1	Cell 2	Cell 1	Cell 2	Cell 3		Mean	SD	Number	SEM
0	0.121	0.108	0.207	0.367	0.248	0.083	0.12	0.111											0.121	0.108	0.207	0.367	0.248	0.083	0.12	0.111		65.5	65.5	65.5	52.5	52.5	25.46	25.46	25.46		0.00184733	0.00164885	0.00316031	0.00699048	0.00472381	0.00326002	0.00471328	0.00435978		0.00383798	0.00174477	8	0.000659462
0.166667	0.207	0.168	0.262	0.267	0.236	0.096	0.097	0.11											0.207	0.168	0.262	0.267	0.236	0.096	0.097	0.11											0.00316031	0.00256489	0.004	0.00508571	0.00449524	0.00377062	0.0038099	0.0043205		0.0039009	0.000783908	8	0.000296289
0.333333	0.249	0.123	0.213	0.316	0.181	0.076	0.133	0.087											0.249	0.123	0.213	0.316	0.181	0.076	0.133	0.087											0.00380153	0.00187786	0.00325191	0.00601905	0.00344762	0.00298507	0.00522388	0.00341712		0.00375301	0.00130186	8	0.000492056
0.5	0.274	0.129	0.166	0.303	0.323	0.07	0.114	0.103											0.274	0.129	0.166	0.303	0.323	0.07	0.114	0.103											0.00418321	0.00196947	0.00253435	0.00577143	0.00615238	0.00274941	0.00447761	0.00404556		0.00398543	0.00150561	8	0.000569065
0.666667	0.256	0.163	0.311	0.14	0.222	0.096	0.111	0.097											0.256	0.163	0.311	0.14	0.222	0.096	0.111	0.097											0.0039084	0.00248855	0.00474809	0.00266667	0.00422857	0.00377062	0.00435978	0.0038099		0.00374757	0.000792011	8	0.000299352
0.833333	0.246	0.101	0.26	0.348	0.274	0.096	0.146	0.092											0.246	0.101	0.26	0.348	0.274	0.096	0.146	0.092											0.00375573	0.00154198	0.00396947	0.00662857	0.00521905	0.00377062	0.00573449	0.00361351		0.00427918	0.00156227	8	0.000590483
1	0.261	0.183	0.279	0.307	0.306	0.099	0.133	0.095											0.261	0.183	0.279	0.307	0.306	0.099	0.133	0.095											0.00398473	0.00279389	0.00425954	0.00584762	0.00582857	0.00388845	0.00522388	0.00373134		0.00444475	0.00108757	8	0.000411064
1.16667	0.307	0.183	0.157	0.203	0.238	0.095	0.136	0.084											0.307	0.183	0.157	0.203	0.238	0.095	0.136	0.084											0.00468702	0.00279389	0.00239695	0.00386667	0.00453333	0.00373134	0.00534171	0.00329929		0.00383128	0.000995297	8	0.000376187
1.33333	0.185	0.14	0.332	0.176	0.293	0.114	0.098	0.072											0.185	0.14	0.332	0.176	0.293	0.114	0.098	0.072											0.00282443	0.0021374	0.0050687	0.00335238	0.00558095	0.00447761	0.00384918	0.00282797		0.00376483	0.00120085	8	0.000453878
1.5	0.283	0.26	0.215	0.311	0.291	0.06	0.134	0.062											0.283	0.26	0.215	0.311	0.291	0.06	0.134	0.062											0.00432061	0.00396947	0.00328244	0.00592381	0.00554286	0.00235664	0.00526316	0.00243519		0.00413677	0.00137816	8	0.000520895
1.66667	0.262	0.131	0.236	0.19	0.383	0.051	0.118	0.082											0.262	0.131	0.236	0.19	0.383	0.051	0.118	0.082											0.004	0.002	0.00360305	0.00361905	0.00729524	0.00200314	0.00463472	0.00322074		0.00379699	0.00168307	8	0.000636142
1.83333	0.22	0.2	0.215	0.249	0.262	0.062	0.104	0.1											0.22	0.2	0.215	0.249	0.262	0.062	0.104	0.1											0.00335878	0.00305344	0.00328244	0.00474286	0.00499048	0.00243519	0.00408484	0.00392773		0.00373447	0.000866183	8	0.000327386
2	0.24	0.132	0.255	0.561	0.449	0.161	0.236	0.215		0.112667	0.0393333	0.187	0.316667	0.22	0.155333	0.140667	0.159667		0.128	0.093	0.068	0.2444	0.229	0.006	0.096	0.056											0.0019542	0.00141985	0.00103817	0.00465524	0.0043619	0.000235664	0.00377062	0.00219953		0.0024544	0.00162695	8	0.000614928
2.16667	0.334	0.265	0.54	0.601	0.525	0.24	0.263	0.241											0.222	0.226	0.353	0.2844	0.305	0.085	0.123	0.082											0.00338931	0.00345038	0.00538931	0.00541714	0.00580952	0.00333857	0.00483111	0.00322074		0.00435576	0.00110911	8	0.000419203
2.33333	0.529	0.312	0.432	0.538	0.622	0.238	0.279	0.267											0.417	0.273	0.245	0.2214	0.402	0.083	0.139	0.108											0.00636641	0.00416794	0.00374046	0.00421714	0.00765714	0.00326002	0.00545954	0.00424195		0.00488883	0.00148966	8	0.000563039
2.5	0.552	0.559	0.587	0.476	0.493	0.277	0.291	0.26											0.44	0.52	0.4	0.1594	0.273	0.122	0.151	0.101											0.00671756	0.00793893	0.00610687	0.00303619	0.0052	0.00479183	0.00593087	0.00396701		0.00546116	0.00155768	8	0.000588749
2.66667	0.495	0.353	0.494	0.534	0.586	0.242	0.296	0.28											0.383	0.314	0.307	0.2174	0.366	0.087	0.156	0.121											0.00584733	0.00479389	0.00468702	0.00414095	0.00697143	0.00341712	0.00612726	0.00475255		0.0050922	0.00114968	8	0.000434538
2.83333	0.582	0.431	0.566	0.608	0.543	0.281	0.288	0.25											0.47	0.392	0.379	0.2914	0.323	0.126	0.148	0.091											0.00717557	0.00598473	0.00578626	0.00555048	0.00615238	0.00494894	0.00581304	0.00357423		0.0056232	0.00103795	8	0.000392309
3	0.434	0.437	0.436	0.64	0.63	0.294	0.268	0.313											0.322	0.398	0.249	0.3234	0.41	0.139	0.128	0.154											0.00491603	0.00607634	0.00380153	0.00616	0.00780952	0.00545954	0.00502749	0.0060487		0.00566239	0.00117367	8	0.000443605
3.16667	0.512	0.419	0.57	0.534	0.571	0.281	0.294	0.249											0.4	0.38	0.383	0.2174	0.351	0.126	0.154	0.09											0.00610687	0.00580153	0.00584733	0.00414095	0.00668571	0.00494894	0.0060487	0.00353496		0.00538937	0.00108239	8	0.000409106
3.33333	0.549	0.441	0.534	0.525	0.519	0.294	0.27	0.3											0.437	0.402	0.347	0.2084	0.299	0.139	0.13	0.141											0.00667176	0.0061374	0.00529771	0.00396952	0.00569524	0.00545954	0.00510605	0.0055381		0.00548442	0.000788945	8	0.000298193
3.5	0.636	0.285	0.402	0.662	0.59	0.332	0.328	0.254											0.524	0.246	0.215	0.3454	0.37	0.177	0.188	0.095											0.008	0.00375573	0.00328244	0.00657905	0.00704762	0.00695208	0.00738413	0.00373134		0.00584155	0.00191322	8	0.00072313
3.66667	0.553	0.365	0.585	0.668	0.578	0.217	0.265	0.296											0.441	0.326	0.398	0.3514	0.358	0.062	0.125	0.137											0.00673282	0.0049771	0.00607634	0.00669333	0.00681905	0.00243519	0.00490966	0.00538099		0.00550306	0.00146604	8	0.000554113
3.83333	0.497	0.347	0.455	0.525	0.586	0.277	0.278	0.34											0.385	0.308	0.268	0.2084	0.366	0.122	0.138	0.181											0.00587786	0.00470229	0.0040916	0.00396952	0.00697143	0.00479183	0.00542027	0.00710919		0.00536675	0.00120863	8	0.000456819
4	0.555	0.249	0.557	0.567	0.593	0.22	0.283	0.212											0.443	0.21	0.37	0.2504	0.373	0.065	0.143	0.053											0.00676336	0.00320611	0.00564885	0.00476952	0.00710476	0.00255302	0.00561665	0.0020817		0.004718	0.00190787	8	0.000721109
4.16667	0.569	0.297	0.587	0.546	0.633	0.213	0.274	0.241											0.457	0.258	0.4	0.2294	0.413	0.058	0.134	0.082											0.0069771	0.00393893	0.00610687	0.00436952	0.00786667	0.00227808	0.00526316	0.00322074		0.00500263	0.00190934	8	0.000721662
4.33333	0.524	0.441	0.632	0.663	0.577	0.259	0.298	0.272											0.412	0.402	0.445	0.3464	0.357	0.104	0.158	0.113											0.00629008	0.0061374	0.00679389	0.0065981	0.0068	0.00408484	0.00620581	0.00443833		0.00591856	0.00105742	8	0.000399667
4.5	0.533	0.371	0.487	0.732	0.541	0.214	0.312	0.24											0.421	0.332	0.3	0.4154	0.321	0.059	0.172	0.081											0.00642748	0.0050687	0.00458015	0.00791238	0.00611429	0.00231736	0.0067557	0.00318146		0.00529469	0.00188352	8	0.000711905
4.66667	0.577	0.303	0.509	0.655	0.433	0.323	0.301	0.279											0.465	0.264	0.322	0.3384	0.213	0.168	0.161	0.12											0.00709924	0.00403053	0.00491603	0.00644571	0.00405714	0.00659859	0.00632364	0.00471328		0.00552302	0.00122673	8	0.000463661
4.83333	0.531	0.465	0.443	0.501	0.674	0.304	0.317	0.282											0.419	0.426	0.256	0.1844	0.454	0.149	0.177	0.123											0.00639695	0.00650382	0.0039084	0.00351238	0.00864762	0.00585232	0.00695208	0.00483111		0.00582558	0.00169181	8	0.000639444
5	0.628	0.362	0.519	0.513	0.539	0.312	0.234	0.25											0.516	0.323	0.332	0.1964	0.319	0.157	0.094	0.091											0.00787786	0.0049313	0.0050687	0.00374095	0.00607619	0.00616654	0.00369207	0.00357423		0.00514098	0.00151092	8	0.000571075
5.16667	0.614	0.422	0.466	0.553	0.588	0.249	0.295	0.274											0.502	0.383	0.279	0.2364	0.368	0.094	0.155	0.115											0.00766412	0.00584733	0.00425954	0.00450286	0.00700952	0.00369207	0.00608798	0.00451689		0.00544754	0.001423	8	0.000537845
5.33333	0.675	0.317	0.523	0.631	0.659	0.337	0.23	0.237											0.563	0.278	0.336	0.3144	0.439	0.182	0.09	0.078											0.00859542	0.00424427	0.00512977	0.00598857	0.0083619	0.00714847	0.00353496	0.00306363		0.00575837	0.00212823	8	0.000804394
5.5	0.593	0.34	0.489	0.647	0.623	0.265	0.298	0.316											0.481	0.301	0.302	0.3304	0.403	0.11	0.158	0.157											0.00734351	0.00459542	0.00461069	0.00629333	0.00767619	0.0043205	0.00620581	0.00616654		0.0059015	0.0012771	8	0.000482699
5.66667	0.595	0.445	0.391	0.595	0.599	0.314	0.267	0.284											0.483	0.406	0.204	0.2784	0.379	0.159	0.127	0.125											0.00737405	0.00619847	0.0031145	0.00530286	0.00721905	0.00624509	0.00498822	0.00490966		0.00566899	0.00139497	8	0.00052725
5.83333	0.789	0.409	0.534	0.556	0.578	0.286	0.308	0.309											0.677	0.37	0.347	0.2394	0.358	0.131	0.168	0.15											0.0103359	0.00564885	0.00529771	0.00456	0.00681905	0.00514533	0.00659859	0.00589159		0.00628712	0.00179689	8	0.000679162
6	0.68	0.397	0.617	0.575	0.558	0.268	0.326	0.294											0.568	0.358	0.43	0.2584	0.338	0.113	0.186	0.135											0.00867176	0.00546565	0.00656489	0.0049219	0.0064381	0.00443833	0.00730558	0.00530244		0.00613858	0.0013925	8	0.000526316
6.16667	0.703	0.469	0.717	0.603	0.616	0.289	0.26	0.295											0.591	0.43	0.53	0.2864	0.396	0.134	0.12	0.136											0.0090229	0.00656489	0.0080916	0.00545524	0.00754286	0.00526316	0.00471328	0.00534171		0.00649945	0.00156503	8	0.000591527
6.33333	0.588	0.336	0.494	0.712	0.616	0.29	0.288	0.302											0.476	0.297	0.307	0.3954	0.396	0.135	0.148	0.143											0.00726718	0.00453435	0.00468702	0.00753143	0.00754286	0.00530244	0.00581304	0.00561665		0.00603687	0.00124563	8	0.000470802
6.5	0.716	0.372	0.506	0.507	0.764	0.253	0.321	0.256											0.604	0.333	0.319	0.1904	0.544	0.098	0.181	0.097											0.00922137	0.00508397	0.00487023	0.00362667	0.0103619	0.00384918	0.00710919	0.0038099		0.00599155	0.00261326	8	0.00098772
6.66667	0.684	0.39	0.36	0.628	0.601	0.167	0.309	0.345											0.572	0.351	0.173	0.3114	0.381	0.012	0.169	0.186											0.00873282	0.00535878	0.00264122	0.00593143	0.00725714	0.000471328	0.00663786	0.00730558		0.00554202	0.00271887	8	0.00102764
6.83333	0.682	0.34	0.498	0.528	0.516	0.211	0.301	0.269											0.57	0.301	0.311	0.2114	0.296	0.056	0.161	0.11											0.00870229	0.00459542	0.00474809	0.00402667	0.0056381	0.00219953	0.00632364	0.0043205		0.00506928	0.00190138	8	0.000718653
7	0.606	0.328	0.453	3.462	3.148	0.747	0.297	0.335											0.494	0.289	0.266	3.1454	2.928	0.592	0.157	0.176											0.00754198	0.00441221	0.00406107	0.0599124	0.0557714	0.0232522	0.00616654	0.0069128		0.0210038	0.0235735	8	0.00890996
7.16667	1.895	1.701	2.147	3.552	3.51	1.837	1.816	1.826		2.38067	1.80333	2.675	3.4	3.50633	1.78833	1.828	1.91267		-0.485	-0.099	-0.51	0.152	0.01	0.049	-0.012	-0.084											-0.00740458	-0.00151145	-0.00778626	0.00289524	0.000190476	0.00192459	-0.000471328	-0.00329929		-0.00193283	0.00398357	8	0.00150565
7.33333	2.881	2.072	3.321	3.594	4.019	1.903	2.039	1.912											0.501	0.272	0.664	0.194	0.519	0.115	0.211	0.002											0.00764885	0.00415267	0.0101374	0.00369524	0.00988571	0.00451689	0.00828751	7.85546e-05		0.00605035	0.00350786	8	0.00132585
7.5	3.131	2.228	3.223	3.804	3.926	1.798	1.985	2.244											0.751	0.428	0.566	0.404	0.426	0.01	0.157	0.334											0.0114656	0.00653435	0.00864122	0.00769524	0.00811429	0.000392773	0.00616654	0.0131186		0.00776608	0.00381107	8	0.00144045
7.66667	3.479	2.215	3.149	4.06	4.072	2.132	1.909	2.372											1.099	0.415	0.492	0.66	0.572	0.344	0.081	0.462											0.0167786	0.00633588	0.00751145	0.0125714	0.0108952	0.0135114	0.00318146	0.0181461		0.0111164	0.00518503	8	0.00195976
7.83333	3.455	2.153	3.147	4.018	4.11	1.927	2.138	2.259											1.075	0.353	0.49	0.618	0.61	0.139	0.31	0.349											0.0164122	0.00538931	0.00748092	0.0117714	0.011619	0.00545954	0.012176	0.0137078		0.010502	0.00399217	8	0.0015089
8	3.467	2.263	3.257	4.053	3.877	2.138	2.088	2.024											1.087	0.463	0.6	0.653	0.377	0.35	0.26	0.114											0.0165954	0.0070687	0.00916031	0.0124381	0.00718095	0.0137471	0.0102121	0.00447761		0.01011	0.00398522	8	0.00150627
8.16667	3.582	2.397	3.243	3.666	4.007	1.826	2.205	2.347											1.202	0.597	0.586	0.266	0.507	0.038	0.377	0.437											0.0183511	0.0091145	0.00894656	0.00506667	0.00965714	0.00149254	0.0148075	0.0171642		0.010575	0.00585857	8	0.00221433
8.33333	3.686	2.008	2.847	4.015	4.036	2.066	2.108	2.218											1.306	0.208	0.19	0.615	0.536	0.278	0.28	0.308											0.0199389	0.00317557	0.00290076	0.0117143	0.0102095	0.0109191	0.0109976	0.0120974		0.0102442	0.00540501	8	0.0020429
8.5	3.493	2.097	3.23	4.187	3.967	2.169	2.107	2.232											1.113	0.297	0.573	0.787	0.467	0.381	0.279	0.322											0.0169924	0.00453435	0.00874809	0.0149905	0.00889524	0.0149647	0.0109584	0.0126473		0.0115914	0.00411919	8	0.00155691
8.66667	3.539	2.306	2.87	4.061	4.077	2.165	2.184	2.171											1.159	0.506	0.213	0.661	0.577	0.377	0.356	0.261											0.0176947	0.00772519	0.00325191	0.0125905	0.0109905	0.0148075	0.0139827	0.0102514		0.0114118	0.00448335	8	0.00169455
8.83334	3.572	2.281	2.977	3.968	4.309	2.376	2.236	2.397											1.192	0.481	0.32	0.568	0.809	0.588	0.408	0.487											0.0181985	0.00734351	0.0048855	0.010819	0.0154095	0.0230951	0.0160251	0.019128		0.014363	0.00620114	8	0.00234381
9	3.472	2.227	3.043	4.109	4.367	2.262	2.191	2.423											1.092	0.427	0.386	0.709	0.867	0.474	0.363	0.513											0.0166718	0.00651908	0.00589313	0.0135048	0.0165143	0.0186174	0.0142577	0.0201493		0.0140159	0.00527242	8	0.00199279
9.16667	4.01	1.968	2.911	4.43	4.074	2.312	2.172	2.404											1.63	0.168	0.254	1.03	0.574	0.524	0.344	0.494											0.0248855	0.00256489	0.00387786	0.019619	0.0109333	0.0205813	0.0135114	0.019403		0.014422	0.0081417	8	0.00307727
9.33334	3.696	2.338	2.881	4.398	4.503	2.27	2.241	2.413											1.316	0.538	0.224	0.998	1.003	0.482	0.413	0.503											0.0200916	0.00821374	0.00341985	0.0190095	0.0191048	0.0189317	0.0162215	0.0197565		0.0155936	0.00627646	8	0.00237228
9.5	3.64	2.16	3.521	4.475	4.442	2.317	2.373	2.312											1.26	0.36	0.864	1.075	0.942	0.529	0.545	0.402											0.0192366	0.00549618	0.0131908	0.0204762	0.0179429	0.0207777	0.0214061	0.0157895		0.0167895	0.00534013	8	0.00201838
9.66667	3.971	2.519	3.277	4.3	4.178	2.418	2.363	2.552											1.591	0.719	0.62	0.9	0.678	0.63	0.535	0.642											0.0242901	0.0109771	0.00946565	0.0171429	0.0129143	0.0247447	0.0210134	0.025216		0.0182205	0.00648706	8	0.00245188
9.83334	4.01	2.422	3.183	4.422	4.581	2.332	2.263	2.635											1.63	0.622	0.526	1.022	1.081	0.544	0.435	0.725											0.0248855	0.00949618	0.00803053	0.0194667	0.0205905	0.0213668	0.0170856	0.028476		0.0186747	0.00703313	8	0.00265827
10	3.747	2.342	3.391	4.325	4.442	2.33	2.348	2.476											1.367	0.542	0.734	0.925	0.942	0.542	0.52	0.566											0.0208702	0.00827481	0.0112061	0.017619	0.0179429	0.0212883	0.0204242	0.022231		0.0174821	0.00509296	8	0.00192496
10.1667	3.672	2.533	3.377	4.582	4.325	2.358	2.321	2.413											1.292	0.733	0.72	1.182	0.825	0.57	0.493	0.503											0.0197252	0.0111908	0.0109924	0.0225143	0.0157143	0.0223881	0.0193637	0.0197565		0.0177057	0.00459127	8	0.00173534
10.3333	3.954	2.682	3.383	4.518	4.748	2.341	2.331	2.589											1.574	0.882	0.726	1.118	1.248	0.553	0.503	0.679											0.0240305	0.0134656	0.011084	0.0212952	0.0237714	0.0217203	0.0197565	0.0266693		0.0202241	0.00536438	8	0.00202755
10.5	4.012	2.668	3.321	4.514	4.53	2.304	2.19	2.41											1.632	0.868	0.664	1.114	1.03	0.516	0.362	0.5											0.024916	0.0132519	0.0101374	0.021219	0.019619	0.0202671	0.0142184	0.0196386		0.0179084	0.00488786	8	0.00184744
10.6667	4.07	2.464	3.911	4.429	4.561	2.405	2.372	2.39											1.69	0.664	1.254	1.029	1.061	0.617	0.544	0.48											0.0258015	0.0101374	0.019145	0.0196	0.0202095	0.0242341	0.0213668	0.0188531		0.0199184	0.00467396	8	0.00176659
10.8333	4.101	2.759	3.626	4.74	4.517	2.469	2.158	2.559											1.721	0.959	0.969	1.34	1.017	0.681	0.33	0.649											0.0262748	0.0146412	0.0147939	0.0255238	0.0193714	0.0267478	0.0129615	0.025491		0.0207257	0.00594153	8	0.00224569
11	4.299	2.417	3.745	4.525	4.387	2.549	2.38	2.738											1.919	0.617	1.088	1.125	0.887	0.761	0.552	0.828											0.0292977	0.00941985	0.0166107	0.0214286	0.0168952	0.02989	0.0216811	0.0325216		0.0222181	0.00792487	8	0.00299532
11.1667	4.175	2.55	3.677	4.784	4.283	2.653	2.309	2.619											1.795	0.75	1.02	1.384	0.783	0.865	0.481	0.709											0.0274046	0.0114504	0.0155725	0.0263619	0.0149143	0.0339749	0.0188924	0.0278476		0.0220523	0.00791271	8	0.00299072
11.3333	3.946	2.615	3.7	4.633	4.464	2.468	2.45	2.593											1.566	0.815	1.043	1.233	0.964	0.68	0.622	0.683											0.0239084	0.0124427	0.0159237	0.0234857	0.0183619	0.0267086	0.0244305	0.0268264		0.021511	0.00530238	8	0.00200411
11.5	4.202	2.658	3.917	4.376	5.138	2.691	2.331	2.536											1.822	0.858	1.26	0.976	1.638	0.903	0.503	0.626											0.0278168	0.0130992	0.0192366	0.0185905	0.0312	0.0354674	0.0197565	0.0245876		0.0237193	0.00742977	8	0.00280819
11.6667	4.153	2.569	3.83	4.939	4.283	2.506	2.407	2.721											1.773	0.769	1.173	1.539	0.783	0.718	0.579	0.811											0.0270687	0.0117405	0.0179084	0.0293143	0.0149143	0.0282011	0.0227416	0.0318539		0.0229678	0.00736795	8	0.00278482
11.8333	4.23	3.013	3.353	4.814	5.046	2.74	2.373	2.576											1.85	1.213	0.696	1.414	1.546	0.952	0.545	0.666											0.0282443	0.0185191	0.010626	0.0269333	0.0294476	0.037392	0.0214061	0.0261587		0.0248409	0.00802031	8	0.00303139
12	4.393	2.817	3.613	2.152	1.914	1.244	1.064	1.567											2.013	1.017	0.956	-1.248	-1.586	-0.544	-0.764	-0.343											0.0307328	0.0155267	0.0145954	-0.0237714	-0.0302095	-0.0213668	-0.0300079	-0.0134721		-0.0072466	0.0238888	8	0.00902911
12.1667	4.415	2.582	3.991	1.888	1.461	0.98	0.781	1.14											2.035	0.782	1.334	-1.512	-2.039	-0.808	-1.047	-0.77											0.0310687	0.0119389	0.0203664	-0.0288	-0.0388381	-0.0317361	-0.0411233	-0.0302435		-0.0134209	0.0293561	8	0.0110955
12.3333	2.7	1.121	2.028	1.581	1.297	0.815	0.72	0.862											0.32	-0.679	-0.629	-1.819	-2.203	-0.973	-1.108	-1.048											0.0048855	-0.0103664	-0.00960305	-0.0346476	-0.0419619	-0.0382168	-0.0435192	-0.0411626		-0.026824	0.0188126	8	0.00711049
12.5	2.28	0.86	1.777	1.733	1.545	0.833	0.653	0.91											-0.1	-0.94	-0.88	-1.667	-1.955	-0.955	-1.175	-1											-0.00152672	-0.0143511	-0.0134351	-0.0317524	-0.0372381	-0.0375098	-0.0461508	-0.0392773		-0.0276552	0.0157879	8	0.00596726
12.6667	1.98	1.165	1.387	1.524	1.452	0.811	0.618	0.89											-0.4	-0.635	-1.27	-1.876	-2.048	-0.977	-1.21	-1.02											-0.00610687	-0.00969466	-0.0193893	-0.0357333	-0.0390095	-0.0383739	-0.0475255	-0.0400628		-0.029487	0.0155207	8	0.00586626
12.8333	1.765	0.886	1.219	1.545	1.472	0.663	0.603	0.774											-0.615	-0.914	-1.438	-1.855	-2.028	-1.125	-1.225	-1.136											-0.00938931	-0.0139542	-0.0219542	-0.0353333	-0.0386286	-0.044187	-0.0481147	-0.044619		-0.0320225	0.0149298	8	0.00564295
13	1.793	0.751	1.506	1.446	1.359	0.765	0.599	0.771											-0.587	-1.049	-1.151	-1.954	-2.141	-1.023	-1.229	-1.139											-0.00896183	-0.0160153	-0.0175725	-0.037219	-0.040781	-0.0401807	-0.0482718	-0.0447368		-0.0317174	0.015081	8	0.00570007
13.1667	1.989	0.885	1.294	1.356	1.399	0.632	0.59	0.766											-0.391	-0.915	-1.363	-2.044	-2.101	-1.156	-1.238	-1.144											-0.00596947	-0.0139695	-0.0208092	-0.0389333	-0.040019	-0.0454046	-0.0486253	-0.0449332		-0.0323329	0.0163129	8	0.00616568
13.3333	1.815	0.868	1.266	1.436	1.425	0.667	0.598	0.672											-0.565	-0.932	-1.391	-1.964	-2.075	-1.121	-1.23	-1.238											-0.00862595	-0.014229	-0.0212366	-0.0374095	-0.0395238	-0.0440299	-0.0483111	-0.0486253		-0.0327489	0.0157958	8	0.00597026
13.5	1.854	0.771	1.132	1.659	1.362	0.659	0.545	0.746											-0.526	-1.029	-1.525	-1.741	-2.138	-1.129	-1.283	-1.164											-0.00803053	-0.0157099	-0.0232824	-0.0331619	-0.0407238	-0.0443441	-0.0503928	-0.0457188		-0.0326705	0.0154394	8	0.00583555
13.6667	1.892	0.974	1.134	1.447	1.135	0.695	0.534	0.642											-0.488	-0.826	-1.523	-1.953	-2.365	-1.093	-1.294	-1.268											-0.00745038	-0.0126107	-0.0232519	-0.0372	-0.0450476	-0.0429301	-0.0508248	-0.0498036		-0.0336399	0.0169947	8	0.00642339
13.8333	1.782	0.999	1.221	1.658	1.277	0.618	0.569	0.845											-0.598	-0.801	-1.436	-1.742	-2.223	-1.17	-1.259	-1.065											-0.00912977	-0.012229	-0.0219237	-0.033181	-0.0423429	-0.0459544	-0.0494501	-0.0418303		-0.0320051	0.015674	8	0.0059242
14	1.916	0.832	1.264	1.51	1.267	0.7	0.533	0.739											-0.464	-0.968	-1.393	-1.89	-2.233	-1.088	-1.295	-1.171											-0.00708397	-0.0147786	-0.0212672	-0.036	-0.0425333	-0.0427337	-0.0508641	-0.0459937		-0.0326568	0.0161377	8	0.00609946
Cytosolic	GFP- cells
sTCO-sulfo-Cy5 (100 and 1 uM)												Only GFP- cells were measured because GFP+ cell showed bright fluorescence at fluorescein channel
9-30-22, Exp Cell 1, 2, 3											Nomalization factor (3 points around 10 min)										Corrected										Nomalization factor										Normalized to the peaks of F(outside) of the exp
	Exp Cell 1			Exp Cell 2			Exp Cell 3				Exp Cell 1			Exp Cell 2			Exp Cell 3				Exp Cell 1			Exp Cell 2			Exp Cell 3				Exp Cell 1			Exp Cell 2			Exp Cell 3				Exp Cell 1			Exp Cell 2			Exp Cell 3
Time	Cell 1	Cell 2	Cell 3	Cell 1	Cell 2	Cell 3	Cell 1	Cell 2	Cell 3		Cell 1	Cell 2	Cell 3	Cell 1	Cell 2	Cell 3	Cell 1	Cell 2	Cell 3		Cell 1	Cell 2	Cell 3	Cell 1	Cell 2	Cell 3	Cell 1	Cell 2	Cell 3		Cell 1	Cell 2	Cell 3	Cell 1	Cell 2	Cell 3	Cell 1	Cell 2	Cell 3		Cell 1	Cell 2	Cell 3	Cell 1	Cell 2	Cell 3	Cell 1	Cell 2	Cell 3
0	0.121	0.108	0.207	0.294	0.269	0.33	0.126	0.193	0.082												0.121	0.108	0.207	0.294	0.269	0.33	0.126	0.193	0.082		65.5	65.5	65.5	52.5	52.5	52.5	25.46	25.46	25.46		0.00184733	0.00164885	0.00316031	0.0056	0.00512381	0.00628571	0.00494894	0.00758052	0.00322074
0.166667	0.183	0.1	0.138	0.242	0.315	0.295	0.081	0.122	0.113												0.183	0.1	0.138	0.242	0.315	0.295	0.081	0.122	0.113												0.00279389	0.00152672	0.00210687	0.00460952	0.006	0.00561905	0.00318146	0.00479183	0.00443833
0.333333	0.153	0.235	0.129	0.326	0.204	0.357	0.082	0.096	0.093												0.153	0.235	0.129	0.326	0.204	0.357	0.082	0.096	0.093												0.00233588	0.00358779	0.00196947	0.00620952	0.00388571	0.0068	0.00322074	0.00377062	0.00365279
0.5	0.132	0.095	0.165	0.186	0.365	0.34	0.063	0.117	0.165												0.132	0.095	0.165	0.186	0.365	0.34	0.063	0.117	0.165												0.00201527	0.00145038	0.00251908	0.00354286	0.00695238	0.00647619	0.00247447	0.00459544	0.00648075
0.666667	0.087	0.087	0.194	0.262	0.257	0.257	0.054	0.126	0.072												0.087	0.087	0.194	0.262	0.257	0.257	0.054	0.126	0.072												0.00132824	0.00132824	0.00296183	0.00499048	0.00489524	0.00489524	0.00212097	0.00494894	0.00282797
0.833333	0.153	0.117	0.091	0.31	0.198	0.345	0.088	0.083	0.096												0.153	0.117	0.091	0.31	0.198	0.345	0.088	0.083	0.096												0.00233588	0.00178626	0.00138931	0.00590476	0.00377143	0.00657143	0.0034564	0.00326002	0.00377062
1	0.081	0.17	0.118	0.341	0.304	0.235	0.06	0.106	0.092												0.081	0.17	0.118	0.341	0.304	0.235	0.06	0.106	0.092												0.00123664	0.00259542	0.00180153	0.00649524	0.00579048	0.00447619	0.00235664	0.00416339	0.00361351
1.16667	0.168	0.155	0.212	0.287	0.204	0.382	0.056	0.107	0.16												0.168	0.155	0.212	0.287	0.204	0.382	0.056	0.107	0.16												0.00256489	0.00236641	0.00323664	0.00546667	0.00388571	0.00727619	0.00219953	0.00420267	0.00628437
1.33333	0.098	0.087	0.118	0.335	0.283	0.345	0.151	0.2	0.119												0.098	0.087	0.118	0.335	0.283	0.345	0.151	0.2	0.119												0.00149618	0.00132824	0.00180153	0.00638095	0.00539048	0.00657143	0.00593087	0.00785546	0.004674
1.5	0.126	0.1	0.172	0.262	0.193	0.257	0.023	0.174	0.087												0.126	0.1	0.172	0.262	0.193	0.257	0.023	0.174	0.087												0.00192366	0.00152672	0.00262595	0.00499048	0.00367619	0.00489524	0.000903378	0.00683425	0.00341712
1.66667	0.1	0.17	0.138	0.254	0.315	0.287	0.081	0.139	0.077												0.1	0.17	0.138	0.254	0.315	0.287	0.081	0.139	0.077												0.00152672	0.00259542	0.00210687	0.0048381	0.006	0.00546667	0.00318146	0.00545954	0.00302435
1.83333	0.089	0.23	0.199	0.246	0.143	0.363	0.064	0.178	0.075												0.089	0.23	0.199	0.246	0.143	0.363	0.064	0.178	0.075												0.00135878	0.00351145	0.00303817	0.00468571	0.00272381	0.00691429	0.00251375	0.00699136	0.0029458
2	0.243	0.2	0.306	0.509	0.517	0.377	0.146	0.269	0.256		0.207	0.157333	0.142667	0.241	0.359667	0.220667	0.123	0.156333	0.185		0.036	0.043	0.1634	0.268	0.158	0.157	0.023	0.113	0.071												0.000549618	0.000656489	0.00249466	0.00510476	0.00300952	0.00299048	0.000903378	0.00443833	0.00278869
2.16667	0.355	0.415	0.397	0.403	0.65	0.54	0.199	0.354	0.23												0.148	0.258	0.2544	0.162	0.291	0.32	0.076	0.198	0.045												0.00225954	0.00393893	0.00388397	0.00308571	0.00554286	0.00609524	0.00298507	0.0077769	0.00176748
2.33333	0.338	0.357	0.234	0.573	0.563	0.652	0.192	0.337	0.308												0.131	0.2	0.0914	0.332	0.204	0.432	0.069	0.181	0.123												0.002	0.00305344	0.00139542	0.00632381	0.00388571	0.00822857	0.00271013	0.00710919	0.00483111
2.5	0.274	0.442	0.426	0.547	0.763	0.517	0.255	0.385	0.292												0.067	0.285	0.2834	0.306	0.404	0.297	0.132	0.229	0.107												0.0010229	0.00435115	0.00432672	0.00582857	0.00769524	0.00565714	0.0051846	0.0089945	0.00420267
2.66667	0.296	0.34	0.351	0.477	0.772	0.522	0.167	0.37	0.272												0.089	0.183	0.2084	0.236	0.413	0.302	0.044	0.214	0.087												0.00135878	0.00279389	0.00318168	0.00449524	0.00786667	0.00575238	0.0017282	0.00840534	0.00341712
2.83333	0.396	0.488	0.42	0.686	0.583	0.642	0.196	0.387	0.235												0.189	0.331	0.2774	0.445	0.224	0.422	0.073	0.231	0.05												0.0028855	0.00505344	0.00423511	0.00847619	0.00426667	0.0080381	0.00286724	0.00907306	0.00196386
3	0.247	0.357	0.395	0.471	0.789	0.465	0.29	0.443	0.238												0.04	0.2	0.2524	0.23	0.43	0.245	0.167	0.287	0.053												0.000610687	0.00305344	0.00385344	0.00438095	0.00819048	0.00466667	0.00655931	0.0112726	0.0020817
3.16667	0.253	0.357	0.328	0.609	0.711	0.85	0.227	0.357	0.256												0.046	0.2	0.1854	0.368	0.352	0.63	0.104	0.201	0.071												0.00070229	0.00305344	0.00283053	0.00700952	0.00670476	0.012	0.00408484	0.00789474	0.00278869
3.33333	0.334	0.32	0.268	0.478	0.637	0.398	0.238	0.419	0.315												0.127	0.163	0.1254	0.237	0.278	0.178	0.115	0.263	0.13												0.00193893	0.00248855	0.0019145	0.00451429	0.00529524	0.00339048	0.00451689	0.0103299	0.00510605
3.5	0.396	0.228	0.397	0.595	0.663	0.538	0.218	0.331	0.246												0.189	0.071	0.2544	0.354	0.304	0.318	0.095	0.175	0.061												0.0028855	0.00108397	0.00388397	0.00674286	0.00579048	0.00605714	0.00373134	0.00687353	0.00239592
3.66667	0.398	0.385	0.393	0.713	0.6	0.688	0.201	0.309	0.394												0.191	0.228	0.2504	0.472	0.241	0.468	0.078	0.153	0.209												0.00291603	0.00348092	0.0038229	0.00899048	0.00459048	0.00891429	0.00306363	0.00600943	0.00820896
3.83333	0.457	0.533	0.303	0.582	0.698	0.495	0.245	0.381	0.441												0.25	0.376	0.1604	0.341	0.339	0.275	0.122	0.225	0.256												0.00381679	0.00574046	0.00244885	0.00649524	0.00645714	0.0052381	0.00479183	0.00883739	0.010055
4	0.223	0.385	0.388	0.52	0.856	0.425	0.181	0.348	0.252												0.016	0.228	0.2454	0.279	0.497	0.205	0.058	0.192	0.067												0.000244275	0.00348092	0.00374656	0.00531429	0.00946667	0.00390476	0.00227808	0.00754124	0.00263158
4.16667	0.304	0.37	0.236	0.545	0.646	0.577	0.218	0.467	0.353												0.097	0.213	0.0934	0.304	0.287	0.357	0.095	0.311	0.168												0.00148092	0.00325191	0.00142595	0.00579048	0.00546667	0.0068	0.00373134	0.0122152	0.00659859
4.33333	0.366	0.463	0.457	0.581	0.785	0.78	0.231	0.294	0.313												0.159	0.306	0.3144	0.34	0.426	0.56	0.108	0.138	0.128												0.00242748	0.00467176	0.0048	0.00647619	0.00811429	0.0106667	0.00424195	0.00542027	0.00502749
4.5	0.411	0.278	0.408	0.679	0.948	0.54	0.205	0.433	0.246												0.204	0.121	0.2654	0.438	0.589	0.32	0.082	0.277	0.061												0.0031145	0.00184733	0.00405191	0.00834286	0.011219	0.00609524	0.00322074	0.0108798	0.00239592
4.66667	0.345	0.393	0.359	0.514	0.798	0.645	0.288	0.376	0.229												0.138	0.236	0.2164	0.273	0.439	0.425	0.165	0.22	0.044												0.00210687	0.00360305	0.00330382	0.0052	0.0083619	0.00809524	0.00648075	0.00864101	0.0017282
4.83333	0.345	0.553	0.4	0.699	0.698	0.567	0.305	0.481	0.292												0.138	0.396	0.2574	0.458	0.339	0.347	0.182	0.325	0.107												0.00210687	0.0060458	0.00392977	0.00872381	0.00645714	0.00660952	0.00714847	0.0127651	0.00420267
5	0.274	0.357	0.525	0.55	0.663	0.403	0.229	0.506	0.303												0.067	0.2	0.3824	0.309	0.304	0.183	0.106	0.35	0.118												0.0010229	0.00305344	0.00583817	0.00588571	0.00579048	0.00348571	0.00416339	0.0137471	0.00463472
5.16667	0.306	0.395	0.431	0.52	0.711	0.745	0.188	0.283	0.228												0.099	0.238	0.2884	0.279	0.352	0.525	0.065	0.127	0.043												0.00151145	0.00363359	0.00440305	0.00531429	0.00670476	0.01	0.00255302	0.00498822	0.00168892
5.33333	0.347	0.502	0.402	0.647	0.62	0.567	0.256	0.307	0.292												0.14	0.345	0.2594	0.406	0.261	0.347	0.133	0.151	0.107												0.0021374	0.00526718	0.00396031	0.00773333	0.00497143	0.00660952	0.00522388	0.00593087	0.00420267
5.5	0.291	0.393	0.429	0.746	0.883	0.52	0.254	0.315	0.285												0.084	0.236	0.2864	0.505	0.524	0.3	0.131	0.159	0.1												0.00128244	0.00360305	0.00437252	0.00961905	0.00998095	0.00571429	0.00514533	0.00624509	0.00392773
5.66667	0.43	0.458	0.514	0.532	0.893	0.55	0.265	0.406	0.203												0.223	0.301	0.3714	0.291	0.534	0.33	0.142	0.25	0.018												0.00340458	0.00459542	0.00567023	0.00554286	0.0101714	0.00628571	0.00557738	0.00981932	0.000706991
5.83333	0.738	0.407	0.379	0.511	0.778	0.613	0.237	0.402	0.246												0.531	0.25	0.2364	0.27	0.419	0.393	0.114	0.246	0.061												0.00810687	0.00381679	0.00360916	0.00514286	0.00798095	0.00748571	0.00447761	0.00966222	0.00239592
6	0.306	0.415	0.368	0.616	0.826	0.855	0.222	0.38	0.324												0.099	0.258	0.2254	0.375	0.467	0.635	0.099	0.224	0.139												0.00151145	0.00393893	0.00344122	0.00714286	0.00889524	0.0120952	0.00388845	0.00879811	0.00545954
6.16667	0.321	0.46	0.63	0.572	0.894	0.582	0.251	0.27	0.382												0.114	0.303	0.4874	0.331	0.535	0.362	0.128	0.114	0.197												0.00174046	0.00462595	0.00744122	0.00630476	0.0101905	0.00689524	0.00502749	0.00447761	0.00773763
6.33333	0.406	0.485	0.612	0.457	0.728	0.803	0.199	0.452	0.246												0.199	0.328	0.4694	0.216	0.369	0.583	0.076	0.296	0.061												0.00303817	0.00500763	0.00716641	0.00411429	0.00702857	0.0111048	0.00298507	0.0116261	0.00239592
6.5	0.445	0.48	0.386	0.652	0.817	0.767	0.238	0.337	0.276												0.238	0.323	0.2434	0.411	0.458	0.547	0.115	0.181	0.091												0.00363359	0.0049313	0.00371603	0.00782857	0.00872381	0.010419	0.00451689	0.00710919	0.00357423
6.66667	0.298	0.335	0.362	0.452	0.722	0.455	0.226	0.396	0.265												0.091	0.178	0.2194	0.211	0.363	0.235	0.103	0.24	0.08												0.00138931	0.00271756	0.00334962	0.00401905	0.00691429	0.00447619	0.00404556	0.00942655	0.00314218
6.83333	0.472	0.442	0.467	0.568	0.702	0.683	0.221	0.265	0.292												0.265	0.285	0.3244	0.327	0.343	0.463	0.098	0.109	0.107												0.0040458	0.00435115	0.00495267	0.00622857	0.00653333	0.00881905	0.00384918	0.00428123	0.00420267
7	1.451	1.773	1.737	3.224	4.063	2.582	0.228	1.594	1.46												-0.639	-0.317	-0.533	-0.096	-0.517	-0.848	-1.132	-0.986	-0.7												-0.00975573	-0.00483969	-0.0081374	-0.00182857	-0.00984762	-0.0161524	-0.0444619	-0.0387274	-0.0274941
7.16667	2.309	2.362	2.38	3.661	4.559	3.358	1.419	2.43	2.029		2.09167	2.628	2.271	3.32467	4.57967	3.43033	1.36567	2.583	2.16067		0.219	0.272	0.11	0.341	-0.021	-0.072	0.059	-0.15	-0.131												0.00334351	0.00415267	0.00167939	0.00649524	-0.0004	-0.00137143	0.00231736	-0.00589159	-0.00514533
7.33333	2.121	2.95	2.496	3.575	5.07	4.3	1.408	2.98	2.257												0.031	0.86	0.226	0.255	0.49	0.87	0.048	0.4	0.097												0.000473282	0.0131298	0.00345038	0.00485714	0.00933333	0.0165714	0.00188531	0.0157109	0.0038099
7.5	2.16	3.072	2.446	3.5	4.761	3.54	1.438	2.83	2.435												0.07	0.982	0.176	0.18	0.181	0.11	0.078	0.25	0.275												0.0010687	0.0149924	0.00268702	0.00342857	0.00344762	0.00209524	0.00306363	0.00981932	0.0108013
7.66667	2.583	3.225	2.774	3.206	4.857	3.84	1.373	2.937	2.136												0.493	1.135	0.504	-0.114	0.277	0.41	0.013	0.357	-0.024												0.00752672	0.0173282	0.00769466	-0.00217143	0.00527619	0.00780952	0.000510605	0.014022	-0.000942655
7.83333	2.294	2.74	2.366	3.432	4.533	3.785	1.576	3.02	2.1												0.204	0.65	0.096	0.112	-0.047	0.355	0.216	0.44	-0.06												0.0031145	0.00992366	0.00146565	0.00213333	-0.000895238	0.0067619	0.0084839	0.017282	-0.00235664
8	2.287	2.848	2.545	3.269	5.009	3.662	1.456	2.859	2.322												0.197	0.758	0.275	-0.051	0.429	0.232	0.096	0.279	0.162												0.00300763	0.0115725	0.00419847	-0.000971429	0.00817143	0.00441905	0.00377062	0.0109584	0.00636292
8.16667	2.453	2.715	2.716	3.815	5.383	3.895	1.681	3.257	2.179												0.363	0.625	0.446	0.495	0.803	0.465	0.321	0.677	0.019												0.00554198	0.00954198	0.00680916	0.00942857	0.0152952	0.00885714	0.012608	0.0265907	0.000746269
8.33333	2.474	3.092	2.524	3.486	5.119	3.562	1.845	2.998	2.29												0.384	1.002	0.254	0.166	0.539	0.132	0.485	0.418	0.13												0.0058626	0.0152977	0.00387786	0.0031619	0.0102667	0.00251429	0.0190495	0.0164179	0.00510605
8.5	2.755	2.99	2.516	3.694	5.148	3.96	1.604	2.719	2.281												0.665	0.9	0.246	0.374	0.568	0.53	0.244	0.139	0.121												0.0101527	0.0137405	0.00375573	0.00712381	0.010819	0.0100952	0.00958366	0.00545954	0.00475255
8.66667	2.372	2.985	2.88	3.681	5.739	3.785	1.695	2.469	2.492												0.282	0.895	0.61	0.361	1.159	0.355	0.335	-0.111	0.332												0.00430534	0.0136641	0.00931298	0.00687619	0.0220762	0.0067619	0.0131579	-0.00435978	0.0130401
8.83334	2.366	2.997	2.712	3.821	5.215	3.705	1.6	3.174	2.462												0.276	0.907	0.442	0.501	0.635	0.275	0.24	0.594	0.302												0.00421374	0.0138473	0.00674809	0.00954286	0.0120952	0.0052381	0.00942655	0.0233307	0.0118617
9	2.76	3.128	2.592	3.898	5.213	4.2	1.531	2.917	2.359												0.67	1.038	0.322	0.578	0.633	0.77	0.171	0.337	0.199												0.010229	0.0158473	0.00491603	0.0110095	0.0120571	0.0146667	0.00671642	0.0132364	0.00781618
9.16667	2.54	2.825	2.841	3.778	5.7	3.793	1.732	3.18	2.336												0.45	0.735	0.571	0.458	1.12	0.363	0.372	0.6	0.176												0.00687023	0.0112214	0.00871756	0.00872381	0.0213333	0.00691429	0.0146112	0.0235664	0.0069128
9.33334	2.717	3.342	3.138	3.663	5.415	4.215	1.723	2.931	2.572												0.627	1.252	0.868	0.343	0.835	0.785	0.363	0.351	0.412												0.00957252	0.0191145	0.0132519	0.00653333	0.0159048	0.0149524	0.0142577	0.0137863	0.0161822
9.5	2.751	2.803	2.607	4.097	5.589	3.697	1.592	3.072	2.425												0.661	0.713	0.337	0.777	1.009	0.267	0.232	0.492	0.265												0.0100916	0.0108855	0.00514504	0.0148	0.019219	0.00508571	0.00911233	0.0193244	0.0104085
9.66667	2.723	3.158	3.027	4.041	5.426	3.947	1.618	2.911	2.325												0.633	1.068	0.757	0.721	0.846	0.517	0.258	0.331	0.165												0.00966412	0.0163053	0.0115573	0.0137333	0.0161143	0.00984762	0.0101335	0.0130008	0.00648075
9.83334	2.696	3.37	2.947	3.774	5.513	4.008	1.796	3.374	2.306												0.606	1.28	0.677	0.454	0.933	0.578	0.436	0.794	0.146												0.00925191	0.019542	0.0103359	0.00864762	0.0177714	0.0110095	0.0171249	0.0311862	0.00573449
10	2.564	3.34	2.911	4.016	5.687	3.767	1.86	3.019	2.59												0.474	1.25	0.641	0.696	1.107	0.337	0.5	0.439	0.43												0.00723664	0.019084	0.00978626	0.0132571	0.0210857	0.00641905	0.0196386	0.0172427	0.0168892
10.1667	3.253	3.368	3.442	3.905	5.387	4.177	1.944	3.27	2.423												1.163	1.278	1.172	0.585	0.807	0.747	0.584	0.69	0.263												0.0177557	0.0195115	0.0178931	0.0111429	0.0153714	0.0142286	0.0229379	0.0271013	0.0103299
10.3333	2.902	3.02	3.312	3.774	6.006	4.307	1.695	3.18	2.382												0.812	0.93	1.042	0.454	1.426	0.877	0.335	0.6	0.222												0.0123969	0.0141985	0.0159084	0.00864762	0.0271619	0.0167048	0.0131579	0.0235664	0.00871956
10.5	3.17	3.422	3.255	4.437	5.844	3.99	1.683	2.77	2.699												1.08	1.332	0.985	1.117	1.264	0.56	0.323	0.19	0.539												0.0164885	0.0203359	0.0150382	0.0212762	0.0240762	0.0106667	0.0126866	0.00746269	0.0211705
10.6667	3.164	3.73	3.386	3.708	5.393	3.943	1.651	3.311	2.772												1.074	1.64	1.116	0.388	0.813	0.513	0.291	0.731	0.612												0.0163969	0.0250382	0.0170382	0.00739048	0.0154857	0.00977143	0.0114297	0.0287117	0.0240377
10.8333	3.168	3.475	3.531	4.106	5.406	4.505	1.749	3.185	2.595												1.078	1.385	1.261	0.786	0.826	1.075	0.389	0.605	0.435												0.016458	0.021145	0.0192519	0.0149714	0.0157333	0.0204762	0.0152789	0.0237628	0.0170856
11	2.881	2.973	3.435	3.846	5.68	4.182	1.888	3.022	2.735												0.791	0.883	1.165	0.526	1.1	0.752	0.528	0.442	0.575												0.0120763	0.0134809	0.0177863	0.010019	0.0209524	0.0143238	0.0207384	0.0173606	0.0225844
11.1667	2.67	3.295	3.426	4.357	5.806	4.028	1.8	3.3	2.652												0.58	1.205	1.156	1.037	1.226	0.598	0.44	0.72	0.492												0.00885496	0.0183969	0.0176489	0.0197524	0.0233524	0.0113905	0.017282	0.0282797	0.0193244
11.3333	2.791	3.412	3.326	3.97	5.881	4.383	1.727	3.209	2.708												0.701	1.322	1.056	0.65	1.301	0.953	0.367	0.629	0.548												0.0107023	0.0201832	0.0161221	0.012381	0.024781	0.0181524	0.0144148	0.0247054	0.021524
11.5	3.064	3.408	3.658	5.12	5.257	4.105	1.835	2.994	2.485												0.974	1.318	1.388	1.8	0.677	0.675	0.475	0.414	0.325												0.0148702	0.0201221	0.0211908	0.0342857	0.0128952	0.0128571	0.0186567	0.0162608	0.0127651
11.6667	3.419	3.453	3.743	4.278	5.763	4.485	1.809	2.794	2.79												1.329	1.363	1.473	0.958	1.183	1.055	0.449	0.214	0.63												0.0202901	0.0208092	0.0224885	0.0182476	0.0225333	0.0200952	0.0176355	0.00840534	0.0247447
11.8333	3.455	3.81	3.359	4.045	5.652	4.575	2.094	3.085	2.602												1.365	1.72	1.089	0.725	1.072	1.145	0.734	0.505	0.442												0.0208397	0.0262595	0.016626	0.0138095	0.020419	0.0218095	0.0288295	0.019835	0.0173606
12	2.938	3.255	3.757	1.912	3.05	2.122	0.944	1.602	0.767												2.731	3.098	3.6144	1.671	2.691	1.902	0.821	1.446	0.582												0.0416947	0.0472977	0.0551817	0.0318286	0.0512571	0.0362286	0.0322467	0.056795	0.0228594
12.1667	1.74	1.59	1.846	1.568	2.169	1.555	0.885	1.213	0.799		0.207	0.157333	0.142667	0.241	0.359667	0.220667	0.123	0.156333	0.185		1.533	1.433	1.7034	1.327	1.81	1.335	0.762	1.057	0.614												0.0234046	0.0218779	0.0260061	0.0252762	0.0344762	0.0254286	0.0299293	0.0415161	0.0241163
12.3333	1.449	1.628	2.096	1.613	2.076	1.77	0.759	1.056	0.748												1.242	1.471	1.9534	1.372	1.717	1.55	0.636	0.9	0.563												0.0189618	0.022458	0.0298229	0.0261333	0.0327048	0.0295238	0.0249804	0.0353496	0.0221131
12.5	1.415	1.467	1.672	1.47	1.728	1.842	0.801	0.924	0.748												1.208	1.31	1.5294	1.229	1.369	1.622	0.678	0.768	0.563												0.0184427	0.02	0.0233496	0.0234095	0.0260762	0.0308952	0.02663	0.030165	0.0221131
12.6667	1.228	1.47	1.161	1.441	1.852	1.435	0.613	0.859	0.73												1.021	1.313	1.0184	1.2	1.493	1.215	0.49	0.703	0.545												0.0155878	0.0200458	0.0155481	0.0228571	0.0284381	0.0231429	0.0192459	0.0276119	0.0214061
12.8333	1.526	1.66	1.612	1.489	1.778	1.188	0.655	0.844	0.624												1.319	1.503	1.4694	1.248	1.419	0.968	0.532	0.688	0.439												0.0201374	0.0229466	0.0224336	0.0237714	0.0270286	0.0184381	0.0208955	0.0270228	0.0172427
13	1.451	1.102	1.505	1.392	1.724	1.55	0.636	0.737	0.676												1.244	0.945	1.3624	1.151	1.365	1.33	0.513	0.581	0.491												0.0189924	0.0144275	0.0208	0.0219238	0.026	0.0253333	0.0201493	0.0228201	0.0192852
13.1667	1.123	1.065	1.395	1.45	1.528	1.28	0.694	0.872	0.661												0.916	0.908	1.2524	1.209	1.169	1.06	0.571	0.716	0.476												0.0139847	0.0138626	0.0191206	0.0230286	0.0222667	0.0201905	0.0224273	0.0281225	0.018696
13.3333	1.421	1.278	1.288	1.624	1.552	1.5	0.594	0.883	0.5												1.214	1.121	1.1454	1.383	1.193	1.28	0.471	0.727	0.315												0.0185344	0.0171145	0.017487	0.0263429	0.0227238	0.024381	0.0184996	0.0285546	0.0123723
13.5	1.204	1.14	1.322	1.401	1.67	1.418	0.594	0.97	0.74												0.997	0.983	1.1794	1.16	1.311	1.198	0.471	0.814	0.555												0.0152214	0.0150076	0.0180061	0.0220952	0.0249714	0.022819	0.0184996	0.0319717	0.0217989
13.6667	1.245	1.305	1.478	1.457	1.726	1.312	0.609	0.861	0.637												1.038	1.148	1.3354	1.216	1.367	1.092	0.486	0.705	0.452												0.0158473	0.0175267	0.0203878	0.0231619	0.0260381	0.0208	0.0190888	0.0276905	0.0177533
13.8333	1.106	1.232	1.33	1.52	1.517	1.44	0.479	0.93	0.618												0.899	1.075	1.1874	1.279	1.158	1.22	0.356	0.774	0.433												0.0137252	0.0164122	0.0181282	0.0243619	0.0220571	0.0232381	0.0139827	0.0304006	0.0170071
14	1.185	1.097	1.178	1.448	1.507	1.26	0.631	0.772	0.639												0.978	0.94	1.0354	1.207	1.148	1.04	0.508	0.616	0.454												0.0149313	0.0143511	0.0158076	0.0229905	0.0218667	0.0198095	0.0199529	0.0241948	0.0178319
Outside										Normalized to Peak of the experiment
	Exp Cell 1			Exp Cell 2			Exp Cell 3
Time	Space 1	Space 2	Space 3	Space 1	Space 2	Space 3	Space 1	Space 2																				Mean	SD	Number	SEM
0	0.183	0.191	0.324	0.4	0.207	0.249	0.167	0.078		65.5201	65.5	65.5	52.5358	52.5	52.5	25.4608	25.46		0.00280245	0.00291603	0.00494656	0.00761905	0.00394286	0.00474286	0.00655931	0.00306363		0.00457409	0.00177071	8	0.000669265
0.166667	0.046	0.179	0.202	0.247	0.22	0.355	0.179	0.071											0.000704441	0.00273282	0.00308397	0.00470476	0.00419048	0.0067619	0.00703064	0.00278869		0.00399971	0.00214205	8	0.000809619
0.333333	0.149	0.187	0.412	0.302	0.36	0.254	0.227	0.091											0.00228178	0.00285496	0.00629008	0.00575238	0.00685714	0.0048381	0.00891595	0.00357423		0.00517058	0.00223064	8	0.000843101
0.5	0.158	0.146	0.311	0.18	0.343	0.224	0.106	0.065											0.0024196	0.00222901	0.00474809	0.00342857	0.00653333	0.00426667	0.00416339	0.00255302		0.00379271	0.00145336	8	0.000549319
0.666667	0.202	0.291	0.172	0.235	0.21	0.301	0.179	0.088											0.00309342	0.00444275	0.00262595	0.00447619	0.004	0.00573333	0.00703064	0.0034564		0.00435733	0.001444	8	0.000545779
0.833333	0.204	0.165	0.248	0.243	0.35	0.26	0.122	0.357											0.00312404	0.00251908	0.00378626	0.00462857	0.00666667	0.00495238	0.00479183	0.014022		0.00556135	0.00364465	8	0.00137755
1	0.197	0.14	0.193	0.435	0.303	0.273	0.139	0.351											0.00301685	0.0021374	0.00294656	0.00828571	0.00577143	0.0052	0.00545954	0.0137863		0.00582548	0.00377462	8	0.00142667
1.16667	0.11	0.219	0.088	0.353	0.373	0.213	0.241	0.182											0.00168453	0.00334351	0.00134351	0.00672381	0.00710476	0.00405714	0.00946583	0.00714847		0.00510895	0.00292431	8	0.00110529
1.33333	0.133	0.128	0.37	0.325	0.203	0.29	0.193	0.172											0.00203675	0.0019542	0.00564885	0.00619048	0.00386667	0.00552381	0.00758052	0.0067557		0.00494462	0.00211024	8	0.000797596
1.5	0.089	0.201	0.261	0.247	0.237	0.24	0.141	0.175											0.00136294	0.0030687	0.00398473	0.00470476	0.00451429	0.00457143	0.0055381	0.00687353		0.00432731	0.00163337	8	0.000617354
1.66667	0.067	0.258	0.143	0.31	0.38	0.292	0.197	0.299											0.00102603	0.00393893	0.00218321	0.00590476	0.0072381	0.0055619	0.00773763	0.0117439		0.00566681	0.00338935	8	0.00128105
1.83333	0.149	0.096	0.261	0.314	0.203	0.311	0.118	0.237											0.00228178	0.00146565	0.00398473	0.00598095	0.00386667	0.00592381	0.00463472	0.00930872		0.00468088	0.00244643	8	0.000924663
2	2.952	1.781	2.882	3.318	4.363	4.623	1.639	1.003											0.0452067	0.0271908	0.044	0.0632	0.0831048	0.0880571	0.0643755	0.0393951		0.0568163	0.0215313	8	0.00813806
2.16667	5.523	6.018	5.752	3.851	5.533	4.35	1.867	1.916											0.0845789	0.0918779	0.0878168	0.0733524	0.10539	0.0828571	0.0733307	0.0752553		0.0843074	0.0109462	8	0.00413729
2.33333	5.835	6.4	5.941	3.518	5.197	4.172	2.161	2.299											0.0893568	0.0977099	0.0907023	0.0670095	0.0989905	0.0794667	0.0848782	0.0902985		0.0873016	0.0103424	8	0.00390907
2.5	6.644	6.181	6.613	3.612	5.217	4.754	2.444	2.049											0.101746	0.0943664	0.100962	0.0688	0.0993714	0.0905524	0.0959937	0.0804792		0.0915338	0.0114799	8	0.00433898
2.66667	6.011	6.222	6.29	3.424	4.34	4.361	2.149	2.097											0.0920521	0.0949924	0.0960305	0.065219	0.0826667	0.0830667	0.0844069	0.0823645		0.0850998	0.00984841	8	0.00372235
2.83333	5.181	6.089	5.702	3.761	4.867	4.831	2.139	2.14											0.0793415	0.0929618	0.0870534	0.0716381	0.0927048	0.092019	0.0840141	0.0840534		0.0854733	0.00743421	8	0.00280987
3	5.443	5.783	5.613	3.655	5.53	4.016	2.659	2.013											0.0833538	0.0882901	0.0856947	0.069619	0.105333	0.0764952	0.104438	0.0790652		0.0865362	0.0127086	8	0.0048034
3.16667	5.47	6.185	6.013	3.792	5.053	4.478	2.149	2.006											0.0837672	0.0944275	0.0918015	0.0722286	0.0962476	0.0852952	0.0844069	0.0787903		0.0858706	0.00809949	8	0.00306132
3.33333	4.778	5.758	5.151	3.541	4.96	4.661	2.61	2.244											0.07317	0.0879084	0.0786412	0.0674476	0.0944762	0.088781	0.102514	0.0881383		0.0851345	0.0114484	8	0.00432708
3.5	5.484	5.73	5.134	4.106	5.693	4.604	2.215	2.039											0.0839816	0.0874809	0.0783817	0.0782095	0.108438	0.0876952	0.0869992	0.0800864		0.0864091	0.0097539	8	0.00368663
3.66667	4.571	6.087	5.929	4.325	5.057	4.484	2.516	2.062											0.07	0.0929313	0.0905191	0.082381	0.0963238	0.0854095	0.0988217	0.0809898		0.087172	0.00943399	8	0.00356571
3.83333	5.018	5.724	5.298	3.533	5.203	4.852	2.378	1.821											0.0768453	0.0873893	0.0808855	0.0672952	0.0991048	0.092419	0.0934014	0.071524		0.0836081	0.0112965	8	0.00426966
4	5.096	5.939	5.336	3.604	5.46	4.757	2.143	2.101											0.0780398	0.0906718	0.0814656	0.0686476	0.104	0.0906095	0.0841712	0.0825216		0.0850159	0.0104184	8	0.00393778
4.16667	4.993	5.904	5.538	3.376	5.117	4.902	2.552	1.682											0.0764625	0.0901374	0.0845496	0.0643048	0.0974667	0.0933714	0.100236	0.0660644		0.0840741	0.0138208	8	0.00522377
4.33333	5.296	5.62	6.282	4.102	5.693	4.672	2.655	1.825											0.0811026	0.0858015	0.0959084	0.0781333	0.108438	0.0889905	0.104281	0.0716811		0.0892921	0.012812	8	0.00484247
4.5	5.461	5.713	5.87	3.82	5.827	4.754	2.253	2.036											0.0836294	0.0872214	0.0896183	0.0727619	0.11099	0.0905524	0.0884918	0.0799686		0.0879043	0.0110471	8	0.00417543
4.66667	5.75	5.77	5.861	4.102	5.307	4.669	2.38	2.091											0.0880551	0.0880916	0.0894809	0.0781333	0.101086	0.0889333	0.09348	0.0821288		0.0886736	0.00689237	8	0.00260507
4.83333	5.03	6.061	5.559	4.027	5.103	4.79	2.058	1.903											0.0770291	0.0925344	0.0848702	0.0767048	0.0972	0.0912381	0.0808327	0.0747447		0.0843942	0.00842179	8	0.00318314
5	5.72	5.819	6.185	3.835	4.75	4.194	2.277	1.607											0.0875957	0.0888397	0.0944275	0.0730476	0.0904762	0.0798857	0.0894344	0.0631186		0.0833532	0.0105973	8	0.00400542
5.16667	5.518	6.642	5.651	4.357	5.647	4.596	2.253	2.438											0.0845023	0.101405	0.0862748	0.0829905	0.107562	0.0875429	0.0884918	0.0957581		0.0918158	0.00883831	8	0.00334057
5.33333	4.991	6.276	7.055	3.725	6.137	4.738	2.317	1.994											0.0764319	0.0958168	0.10771	0.0709524	0.116895	0.0902476	0.0910055	0.0783189		0.0909223	0.0158044	8	0.0059735
5.5	5.622	6.075	5.916	4.365	5.777	4.883	1.898	1.864											0.0860949	0.0927481	0.0903206	0.0831429	0.110038	0.0930095	0.0745483	0.0732129		0.0878894	0.0117439	8	0.00443877
5.66667	5.411	6.657	6.824	3.808	5.43	4.645	2.39	1.88											0.0828637	0.101634	0.104183	0.0725333	0.103429	0.0884762	0.0938727	0.0738413		0.0901041	0.012824	8	0.004847
5.83333	5.5	6.726	5.681	4.102	5.55	4.331	2.245	2.169											0.0842266	0.102687	0.0867328	0.0781333	0.105714	0.0824952	0.0881775	0.0851925		0.0891699	0.00978312	8	0.00369767
6	5.573	5.937	6.017	3.639	5.02	4.183	2.137	1.864											0.0853446	0.0906412	0.0918626	0.0693143	0.095619	0.0796762	0.0839356	0.0732129		0.0837008	0.00920211	8	0.00347807
6.16667	5.241	6.156	5.92	4.271	4.31	4.251	2.398	1.75											0.0802603	0.0939847	0.0903817	0.0813524	0.0820952	0.0809714	0.094187	0.0687353		0.083996	0.00854402	8	0.00322934
6.33333	5.759	6.63	5.286	4.286	5.17	4.634	2.303	1.89											0.088193	0.101221	0.0807023	0.0816381	0.0984762	0.0882667	0.0904556	0.0742341		0.0878984	0.00905414	8	0.00342214
6.5	5.452	6.35	5.882	4.561	5.317	4.462	2.133	2.055											0.0834916	0.0969466	0.0898015	0.0868762	0.101276	0.0849905	0.0837785	0.0807148		0.0884845	0.00716347	8	0.00270754
6.66667	5.878	7.061	5.929	4.247	5.773	4.781	2.434	2.12											0.0900153	0.107802	0.0905191	0.0808952	0.109962	0.0910667	0.0956009	0.0832679		0.0936411	0.0104902	8	0.00396492
6.83333	5.477	5.817	5.433	4.522	5.473	4.156	2.355	2.195											0.0838744	0.0888092	0.0829466	0.0861333	0.104248	0.0791619	0.092498	0.0862137		0.0879856	0.00767385	8	0.00290044
7	21.206	12.85	27.034	38.8	50.163	44.396	13.297	1.614											0.324747	0.196183	0.412733	0.739048	0.955486	0.845638	0.52227	0.0633936		0.507437	0.317443	8	0.119982
7.16667	50.92	55.419	55.857	42.706	57.81	45.65	26.133	17.526											0.779786	0.846092	0.852779	0.813448	1.10114	0.869524	1.02643	0.688374		0.872197	0.132586	8	0.0501128
7.33333	54.615	63.073	58.735	43.29	57.277	46.456	26.414	21.688											0.836371	0.962947	0.896718	0.824571	1.09099	0.884876	1.03747	0.851846		0.923224	0.0980667	8	0.0370657
7.5	53.252	64.945	61.55	42.129	54.51	46.587	26.484	21.617											0.815498	0.991527	0.939695	0.802457	1.03829	0.887371	1.04022	0.849057		0.920514	0.0961997	8	0.0363601
7.66667	56.303	65.53	58.345	42.302	58.873	48.071	27.259	21.925											0.862221	1.00046	0.890763	0.805752	1.12139	0.915638	1.07066	0.861155		0.941005	0.111437	8	0.0421194
7.83333	56.19	64.535	59.697	43.569	56.67	48.921	27.406	22.526											0.86049	0.985267	0.911405	0.829886	1.07943	0.931829	1.07643	0.88476		0.944937	0.0943333	8	0.0356546
8	54.899	63.663	57.63	43.722	57.103	47.981	26.496	23.461											0.84072	0.971954	0.879847	0.8328	1.08768	0.913924	1.04069	0.921485		0.936137	0.0916813	8	0.0346523
8.16667	54.096	62.47	59.29	44.765	58.21	48.801	26.681	22.679											0.828423	0.95374	0.905191	0.852667	1.10876	0.929543	1.04796	0.89077		0.939632	0.0957261	8	0.0361811
8.33333	53.771	63.51	55.723	45.706	56.327	48.719	27.578	22.078											0.823446	0.969618	0.850733	0.87059	1.0729	0.927981	1.08319	0.867164		0.933202	0.100351	8	0.0379292
8.5	54.408	62.329	55.941	43.612	59.347	47.765	26.884	21.266											0.833201	0.951588	0.854061	0.830705	1.13042	0.90981	1.05593	0.835271		0.925123	0.113817	8	0.0430187
8.66667	53.991	61.785	57.613	45.741	57.787	47.88	28.783	22.136											0.826815	0.943282	0.879588	0.871257	1.1007	0.912	1.13052	0.869442		0.941701	0.112795	8	0.0426326
8.83334	55.351	64.329	58.307	44.675	61.367	49.402	28.327	22.711											0.847642	0.982122	0.890183	0.850952	1.1689	0.94099	1.11261	0.892027		0.960677	0.120584	8	0.0455766
9	55.778	63.703	58.866	43.843	57.81	49.339	29.215	22.981											0.854181	0.972565	0.898718	0.835105	1.10114	0.93979	1.14749	0.902632		0.956452	0.112999	8	0.0427096
9.16667	55.601	64.388	61.101	46.714	58.823	48.26	30.711	23.091											0.85147	0.983023	0.93284	0.88979	1.12044	0.919238	1.20625	0.906952		0.97625	0.123471	8	0.0466678
9.33334	57.748	65.002	61.458	47.075	60.203	51.284	28.685	21.805											0.884349	0.992397	0.93829	0.896667	1.14672	0.976838	1.12667	0.856441		0.977297	0.108571	8	0.041036
9.5	57.174	67.154	60.529	46.255	58.537	49.888	28.711	21.929											0.875559	1.02525	0.924107	0.881048	1.11499	0.950248	1.12769	0.861312		0.970026	0.10696	8	0.0404269
9.66667	57.718	67.067	60.433	45.106	58.24	47.956	28.412	22.64											0.88389	1.02392	0.922641	0.859162	1.10933	0.913448	1.11595	0.889238		0.964698	0.103552	8	0.0391388
9.83334	58.867	66.083	63.021	45.42	61.14	48.194	27.665	23.808											0.901485	1.0089	0.962153	0.865143	1.16457	0.917981	1.08661	0.935114		0.980244	0.101279	8	0.03828
10	57.842	68.39	59.836	46.306	59.633	47.869	28.476	22.864											0.885789	1.04412	0.913527	0.882019	1.13587	0.91179	1.11846	0.898036		0.973701	0.107919	8	0.0407895
10.1667	60.275	66.835	65.487	45.843	58.16	48.577	28.546	24											0.923047	1.02038	0.999802	0.8732	1.10781	0.925276	1.12121	0.942655		0.989173	0.0899717	8	0.0340061
10.3333	59.819	67.762	61.803	49.427	60.307	49.71	28.179	22.468											0.916064	1.03453	0.943557	0.941467	1.1487	0.946857	1.10679	0.882482		0.990058	0.0957764	8	0.0362001
10.5	61.278	68.606	64.786	45.141	61.477	49.183	28.305	22.289											0.938407	1.04742	0.989099	0.859829	1.17099	0.936819	1.11174	0.875452		0.99122	0.111112	8	0.0419964
10.6667	58.7	67.687	61.55	45.145	62.447	49.385	28.689	23.789											0.898928	1.03339	0.939695	0.859905	1.18947	0.940667	1.12683	0.934368		0.990406	0.115677	8	0.0437217
10.8333	58.25	70.705	62.702	46.149	62.427	51.637	27.484	24.416											0.892037	1.07947	0.957282	0.879029	1.18909	0.983562	1.0795	0.958995		1.00237	0.105837	8	0.0400025
11	59.773	67.656	63.845	47.824	61.933	49.527	27.522	23.383											0.91536	1.03292	0.974733	0.910933	1.17968	0.943371	1.08099	0.918421		0.99455	0.0965741	8	0.0365016
11.1667	60.732	70.047	65.408	46.475	61.38	49.628	26.924	24.344											0.930046	1.06942	0.998595	0.885238	1.16914	0.945295	1.0575	0.956167		1.00143	0.0923491	8	0.0349047
11.3333	61.823	71.23	61.933	46.404	58.707	49.568	27.721	24.331											0.946753	1.08748	0.945542	0.883886	1.11823	0.944152	1.08881	0.955656		0.996313	0.0876498	8	0.0331285
11.5	60.147	71.894	64.878	47.188	59.827	52.131	27.319	23.256											0.921087	1.09762	0.990504	0.898819	1.13956	0.992971	1.07302	0.913433		1.00338	0.0912965	8	0.0345068
11.6667	61.333	68.888	67.597	45.757	59.407	49.205	27.241	24.325											0.93925	1.05173	1.03202	0.871562	1.13156	0.937238	1.06995	0.95542		0.998591	0.0861891	8	0.0325764
11.8333	61.447	70.673	62.824	46.784	60.993	51.53	26.056	24.568											0.940995	1.07898	0.959145	0.891124	1.16177	0.981524	1.02341	0.964965		1.00024	0.0857975	8	0.0324284
12	62.174	69.866	63.088	11.373	15.42	10.945	7.07	16.01											0.952129	1.06666	0.963176	0.216629	0.293714	0.208476	0.27769	0.62883		0.575912	0.371831	8	0.140539
12.1667	22.775	38.364	24.651	5.294	6.607	5.877	4.225	5.487											0.348775	0.58571	0.376351	0.100838	0.125848	0.111943	0.165947	0.215515		0.253866	0.170411	8	0.0644094
12.3333	9.819	12.648	11.445	5.431	5.89	5.473	3.835	4.555											0.150368	0.193099	0.174733	0.103448	0.11219	0.104248	0.150628	0.178908		0.145953	0.0355857	8	0.0134501
12.5	7.193	8.969	8.782	4.859	5.267	5.025	3.432	3.506											0.110153	0.136931	0.134076	0.0925524	0.100324	0.0957143	0.1348	0.137706		0.117782	0.0200189	8	0.00756642
12.6667	7.172	8.238	7.95	5.518	6.07	5	3.086	3.36											0.109832	0.125771	0.121374	0.105105	0.115619	0.0952381	0.12121	0.131972		0.115765	0.011917	8	0.00450421
12.8333	6.995	7.866	8.126	5.192	5.777	4.951	2.944	3.049											0.107121	0.120092	0.124061	0.0988952	0.110038	0.0943048	0.115632	0.119756		0.111238	0.0106379	8	0.00402076
13	6.787	7.656	8.265	4.141	6.373	4.822	3.177	2.607											0.103936	0.116885	0.126183	0.0788762	0.12139	0.0918476	0.124784	0.102396		0.108287	0.0170166	8	0.00643166
13.1667	6.115	6.949	7.727	5.078	6.01	5.325	3.09	2.461											0.0936447	0.106092	0.117969	0.0967238	0.114476	0.101429	0.121367	0.0966614		0.106045	0.0106774	8	0.00403569
13.3333	6.282	7.362	7.088	4.047	5.35	5.246	2.787	2.614											0.0962021	0.112397	0.108214	0.0770857	0.101905	0.0999238	0.109466	0.102671		0.100983	0.0110407	8	0.00417299
13.5	6.296	6.943	7.134	4.176	5.84	5.096	2.701	2.234											0.0964165	0.106	0.108916	0.0795429	0.111238	0.0970667	0.106088	0.0877455		0.0991267	0.0111025	8	0.00419637
13.6667	6.22	6.726	6.601	4.204	5.943	4.956	2.701	2.731											0.0952527	0.102687	0.100779	0.0800762	0.1132	0.0944	0.106088	0.107266		0.0999686	0.0101614	8	0.00384064
13.8333	6.073	7.012	7.29	4.533	6.093	4.861	2.787	2.61											0.0930015	0.107053	0.111298	0.0863429	0.116057	0.0925905	0.109466	0.102514		0.10229	0.0105531	8	0.00398869
14	6.587	7.156	7.445	3.945	5.793	4.522	2.516	2.318											0.100873	0.109252	0.113664	0.0751429	0.110343	0.0861333	0.0988217	0.0910448		0.0981593	0.0133346	8	0.00504001

## Sheet: Fluorescein_Permeation
Measuring sTCO dyes into HEK cells
sTCO-fluorescein (100 nM and 1 uM) Cells transfected with GFP-TAG							Only GFP(-) cells were measured because GFP+ cell showed bright fluorescence at fluorescein channel
9-23-22, Exp 3
	GFP (-) cell	GFP (-) cell	GFP (-) cell				Nomalization factor (3 points around 10 min)
Time	Cell 1_GFP-	Cell 2_GFP-	Cell 3_GFP-					Cell 1_GFP+	Cell 2_GFP+	Cell 3_GFP-		Mean	SD	Number	SEM
0	1.099	1.054	0.657	0.165	24.3713	23.33		0.0489314	0.0432499	0.0281612		0.0401142	0.0107343	3	0.00759031
0.166667	0.892	0.865	0.661					0.039715	0.0354945	0.0283326		0.034514	0.0057542	3	0.00406884
0.333333	1.071	0.904	0.706					0.0476848	0.0370948	0.0302615		0.038347	0.00877889	3	0.00620761
0.5	1.009	0.913	0.718					0.0449243	0.0374641	0.0307758		0.0377214	0.00707775	3	0.00500473
0.666667	1.011	0.808	0.776					0.0450134	0.0331555	0.0332619		0.0371436	0.00681563	3	0.00481938
0.833333	0.987	0.791	0.644					0.0439448	0.0324579	0.0276039		0.0346689	0.00839178	3	0.00593389
1	1.069	0.831	0.553					0.0475957	0.0340993	0.0237034		0.0351328	0.0119797	3	0.00847089
1.16667	0.971	0.742	0.624					0.0432324	0.0304473	0.0267467		0.0334755	0.00864999	3	0.00611646
1.33333	0.908	0.828	0.596					0.0404274	0.0339762	0.0255465		0.0333167	0.00746235	3	0.00527668
1.5	1.07	0.758	0.682					0.0476402	0.0311038	0.0292327		0.0359923	0.0101307	3	0.00716351
1.66667	0.869	0.69	0.606					0.038691	0.0283135	0.0259751		0.0309932	0.00676823	3	0.00478586
1.83333	0.96	0.739	0.597					0.0427427	0.0303242	0.0255894		0.0328854	0.00885882	3	0.00626413
2	0.872	0.669	0.587					0.0388246	0.0274518	0.0251607		0.030479	0.00731767	3	0.00517437
2.16667	0.95	0.68	0.632					0.0422974	0.0279032	0.0270896		0.0324301	0.00855506	3	0.00604934
2.33333	0.96	0.792	0.645					0.0427427	0.032499	0.0276468		0.0342961	0.00770672	3	0.00544947
2.5	0.852	0.69	0.583					0.0379341	0.0283135	0.0249893		0.0304123	0.00672278	3	0.00475373
2.66667	0.822	0.854	0.661					0.0365984	0.0350431	0.0283326		0.0333247	0.00439265	3	0.00310608
2.83333	0.903	0.801	0.792					0.0402048	0.0328683	0.0339477		0.0356736	0.00396108	3	0.00280091
3	1.099	0.805	0.724					0.0489314	0.0330324	0.031033		0.0376656	0.00980757	3	0.006935
3.16667	1.039	0.839	0.744					0.04626	0.0344276	0.0318903		0.037526	0.00766957	3	0.00542321
3.33333	1.123	0.992	0.696					0.05	0.0407058	0.0298328		0.0401795	0.0100939	3	0.00713745
3.5	1.181	1.16	0.832					0.0525824	0.0475995	0.0356622		0.0452814	0.008695	3	0.00614829
3.66667	1.24	1.048	0.938					0.0552093	0.0430037	0.0402057		0.0461396	0.0079782	3	0.00564144
3.83333	1.271	1.188	1.034					0.0565895	0.0487485	0.0443206		0.0498862	0.00621306	3	0.0043933
4	1.376	1.161	0.927					0.0612645	0.0476405	0.0397342		0.0495464	0.0108909	3	0.00770104
4.16667	1.369	1.161	1.192					0.0609528	0.0476405	0.051093		0.0532288	0.00690835	3	0.00488494
4.33333	1.46	1.304	1.109					0.0650045	0.0535084	0.0475354		0.0553494	0.00887886	3	0.00627831
4.5	1.394	1.385	1.176					0.0620659	0.0568322	0.0504072		0.0564351	0.00583948	3	0.00412914
4.66667	1.424	1.41	1.191					0.0634016	0.057858	0.0510502		0.0574366	0.0061865	3	0.00437452
4.83333	1.689	1.564	1.228					0.0752004	0.0641773	0.0526361		0.0640046	0.0112831	3	0.00797837
5	1.698	1.694	1.257					0.0756011	0.0695117	0.0538791		0.0663306	0.0112049	3	0.00792307
5.16667	1.755	1.809	1.533					0.0781389	0.0742306	0.0657094		0.072693	0.00635583	3	0.00449425
5.33333	1.817	1.854	1.515					0.0808994	0.0760771	0.0649378		0.0739715	0.00818645	3	0.0057887
5.5	1.875	2.049	1.628					0.0834817	0.0840788	0.0697814		0.079114	0.00808776	3	0.00571891
5.66667	2.065	1.813	1.886					0.0919412	0.0743947	0.0808401		0.082392	0.00887559	3	0.00627599
5.83333	2.085	2.324	1.714					0.0928317	0.0953632	0.0734676		0.0872208	0.0119777	3	0.0084695
6	2.147	2.148	1.87					0.0955922	0.0881412	0.0801543		0.0879625	0.00772048	3	0.0054592
6.16667	2.273	2.275	2.063					0.101202	0.0933525	0.0884269		0.0943272	0.00644314	3	0.00455599
6.33333	2.429	2.339	2.202					0.108148	0.0959787	0.0943849		0.0995038	0.00752824	3	0.00532327
6.5	2.25	2.47	2.113					0.100178	0.101354	0.0905701		0.0973674	0.00591597	3	0.00418323
6.66667	2.579	2.563	2.204					0.114826	0.10517	0.0944706		0.104822	0.0101823	3	0.00719999
6.83333	2.617	2.83	2.327					0.116518	0.116126	0.0997428		0.110796	0.00957418	3	0.00676997
7	2.657	3.001	2.299					0.118299	0.123143	0.0985426		0.113328	0.0130318	3	0.0092149
7.16667	2.734	2.856	2.514					0.121728	0.117193	0.107758		0.11556	0.00712647	3	0.00503917
7.33333	3.111	3.116	2.562					0.138513	0.127862	0.109816		0.125397	0.0145066	3	0.0102577
7.5	2.944	3.105	2.702					0.131077	0.127411	0.115817		0.124768	0.00796624	3	0.00563299
7.66667	3.024	3.203	2.821					0.134639	0.131432	0.120917		0.128996	0.00717802	3	0.00507562
7.83333	3.374	3.345	3.05					0.150223	0.137259	0.130733		0.139405	0.00992045	3	0.00701482
8	3.393	3.878	2.866					0.151069	0.15913	0.122846		0.144348	0.0190526	3	0.0134723
8.16667	3.483	3.66	2.966					0.155076	0.150185	0.127132		0.144131	0.0149229	3	0.0105521
8.33333	3.585	3.874	3.225					0.159617	0.158966	0.138234		0.152272	0.0121619	3	0.00859976
8.5	3.683	3.885	3.451					0.16398	0.159417	0.147921		0.157106	0.00827531	3	0.00585153
8.66667	3.862	4.352	3.382					0.17195	0.17858	0.144964		0.165165	0.017806	3	0.0125907
8.83334	4.015	4.316	3.653					0.178762	0.177103	0.15658		0.170815	0.0123561	3	0.00873709
9	4.202	4.202	3.745					0.187088	0.172425	0.160523		0.173345	0.0133065	3	0.00940912
9.16667	4.271	4.539	3.954					0.19016	0.186254	0.169481		0.181965	0.0109863	3	0.00776846
9.33334	4.094	4.684	4.001					0.18228	0.192204	0.171496		0.181993	0.0103568	3	0.00732335
9.5	4.57	4.714	4.262					0.203473	0.193435	0.182683		0.193197	0.0103968	3	0.00735167
9.66667	4.583	4.973	4.237					0.204052	0.204062	0.181612		0.196575	0.0129588	3	0.00916328
9.83334	5.051	5.31	4.337					0.224889	0.217891	0.185898		0.209559	0.0207878	3	0.0146992
10	5.426	5.306	4.712					0.241585	0.217727	0.201972		0.220428	0.0199443	3	0.0141028
10.1667	5.048	5.453	4.887					0.224755	0.223759	0.209473		0.219329	0.00855015	3	0.00604587
10.3333	5.347	5.54	5.345					0.238068	0.227329	0.229104		0.2315	0.00575649	3	0.00407045
10.5	5.798	6.155	5.022					0.258148	0.252565	0.215259		0.241991	0.0233177	3	0.0164881
10.6667	5.787	6.198	5.345					0.257658	0.254329	0.229104		0.24703	0.0156136	3	0.0110405
10.8333	6.245	6.662	5.607					0.27805	0.273369	0.240334		0.263918	0.0205575	3	0.0145363
11	6.664	6.785	5.879					0.296705	0.278416	0.251993		0.275705	0.022479	3	0.0158951
11.1667	6.607	6.662	6.105					0.294167	0.273369	0.26168		0.276406	0.0164551	3	0.0116355
11.3333	6.942	7.604	6.433					0.309083	0.312023	0.275739		0.298948	0.0201533	3	0.0142505
11.5	7.092	7.471	6.69					0.315761	0.306565	0.286755		0.303027	0.0148232	3	0.0104816
11.6667	7.417	7.928	6.677					0.330232	0.325318	0.286198		0.313916	0.0241297	3	0.0170623
11.8333	7.77	8.021	6.721					0.345948	0.329134	0.288084		0.321056	0.0297661	3	0.0210478
12	7.849	8.595	6.995					0.349466	0.352688	0.299829		0.333994	0.029632	3	0.020953
12.1667	8.515	8.918	7.593					0.379118	0.365942	0.325461		0.35684	0.0279627	3	0.0197726
12.3333	8.412	9.207	7.828					0.374533	0.377801	0.335534		0.362622	0.0235162	3	0.0166285
12.5	8.748	9.73	7.977					0.389492	0.399261	0.34192		0.376891	0.0306772	3	0.0216921
12.6667	9.339	9.418	7.949					0.415806	0.386459	0.34072		0.380995	0.0378399	3	0.0267569
12.8333	9.625	10.226	8.595					0.42854	0.419614	0.36841		0.405521	0.0324478	3	0.0229441
13	9.768	10.112	8.649					0.434907	0.414936	0.370724		0.406856	0.0328452	3	0.0232251
13.1667	10.207	10.654	9.153					0.454452	0.437177	0.392327		0.427986	0.0320661	3	0.0226742
13.3333	10.436	10.999	9.513					0.464648	0.451334	0.407758		0.441247	0.0297561	3	0.0210408
13.5	10.641	11.713	9.757					0.473776	0.480632	0.418217		0.457541	0.0342282	3	0.024203
13.6667	11.112	11.51	10.196					0.494746	0.472302	0.437034		0.468027	0.0290927	3	0.0205716
13.8333	11.626	12.37	10.434					0.517631	0.507591	0.447235		0.490819	0.0380772	3	0.0269247
14	12.021	12.567	10.688					0.535218	0.515675	0.458123		0.503005	0.040079	3	0.0283401
14.1667	12.401	12.912	11.669					0.552137	0.529832	0.500171		0.52738	0.0260694	3	0.0184339
14.3333	13.032	13.26	11.925					0.580232	0.544112	0.511144		0.545163	0.0345555	3	0.0244344
14.5	13.717	13.928	12.37					0.61073	0.571522	0.530219		0.570824	0.0402603	3	0.0284684
14.6667	13.888	14.124	12.737					0.618344	0.579565	0.545949		0.581286	0.0362278	3	0.0256169
14.8333	14.174	14.557	12.399					0.631077	0.597333	0.531462		0.586624	0.050664	3	0.0358248
15	14.18	14.567	13.038					0.631345	0.597743	0.558851		0.59598	0.0362788	3	0.025653
15.1667	14.787	15.091	13.644					0.65837	0.619245	0.584826		0.620814	0.0367971	3	0.0260195
15.3333	15.363	15.764	14.114					0.684016	0.646861	0.604972		0.645283	0.0395456	3	0.0279629
15.5	15.669	16.152	14.183					0.69764	0.662782	0.60793		0.656117	0.0452251	3	0.031979
15.6667	15.895	16.964	14.415					0.707703	0.696102	0.617874		0.673893	0.0488592	3	0.0345487
15.8333	16.503	16.703	15.62					0.734773	0.685392	0.669524		0.696563	0.0340286	3	0.0240618
16	16.287	17.56	15.655					0.725156	0.720558	0.671024		0.705579	0.0300137	3	0.0212229
16.1667	17.179	17.913	15.542					0.764871	0.735043	0.666181		0.722032	0.0506152	3	0.0357904
16.3333	17.279	17.979	16.765					0.769323	0.737751	0.718603		0.741892	0.0256126	3	0.0181109
16.5	17.932	18.753	16.862					0.798397	0.769512	0.72276		0.763556	0.0381684	3	0.0269892
16.6667	17.802	19.172	17.011					0.792609	0.786705	0.729147		0.769487	0.03506	3	0.0247911
16.8333	18.257	19.511	17.796					0.812867	0.800616	0.762795		0.792093	0.0261017	3	0.0184567
17	18.626	19.751	18.138					0.829297	0.810464	0.777454		0.805738	0.0262424	3	0.0185562
17.1667	19.206	20.498	18.275					0.85512	0.841116	0.783326		0.826521	0.0380574	3	0.0269106
17.3333	18.848	20.701	18.913					0.839181	0.849446	0.810673		0.8331	0.0200891	3	0.0142051
17.5	19.403	20.648	18.851					0.863891	0.847271	0.808015		0.839726	0.0286919	3	0.0202883
17.6667	20.164	21.228	19.31					0.897774	0.871071	0.82769		0.865511	0.0353713	3	0.0250113
17.8333	20.011	21.484	19.691					0.890962	0.881576	0.844021		0.872186	0.0248393	3	0.0175641
18	20.887	21.707	20.386					0.929964	0.890726	0.873811		0.898167	0.0288069	3	0.0203696
18.1667	20.928	21.631	20.657					0.93179	0.887608	0.885426		0.901608	0.026161	3	0.0184986
18.3333	20.876	22.523	20.999					0.929475	0.92421	0.900086		0.917923	0.0156706	3	0.0110808
18.5	21.06	22.566	20.831					0.937667	0.925975	0.892885		0.918842	0.0232275	3	0.0164243
18.6667	20.51	22.328	21.181					0.913179	0.916208	0.907887		0.912425	0.00421176	3	0.00297817
18.8333	21.133	22.9	21.272					0.940917	0.93968	0.911787		0.930795	0.0164725	3	0.0116478
19	21.691	23.243	21.467					0.965761	0.953755	0.920146		0.946554	0.023645	3	0.0167195
19.1667	21.338	23.069	22.075					0.950045	0.946615	0.946207		0.947622	0.00210792	3	0.00149052
19.3333	21.523	22.998	21.958					0.958281	0.943701	0.941192		0.947725	0.00922803	3	0.0065252
19.5	21.952	23.64	22.388					0.977382	0.970045	0.959623		0.969017	0.00892416	3	0.00631034
19.6667	22.101	23.53	22.33					0.984016	0.965531	0.957137		0.968895	0.0137517	3	0.00972389
19.8333	22.166	23.357	22.515					0.98691	0.958432	0.965066		0.970136	0.0149004	3	0.0105361
20	22.176	24.463	23.111					0.987355	1.00382	0.990613		0.993928	0.00871682	3	0.00616372
20.1667	22.585	24.439	22.847					1.00557	1.00283	0.979297		0.995898	0.0144417	3	0.0102118
20.3333	22.266	24.52	23.551					0.991362	1.00616	1.00947		1.00233	0.00964206	3	0.00681796
20.5	21.758	24.535	23.2					0.968744	1.00677	0.994428		0.989981	0.0193992	3	0.0137173
20.6667	22.756	24.411	23.329					1.01318	1.00168	0.999957		1.00494	0.00718755	3	0.00508237
20.8333	22.864	24.168	23.461					1.01799	0.991711	1.00562		1.0051	0.0131456	3	0.00929537

## Sheet: JF_Permeation
Measuring sTCO dyes into HEK cells
sTCO-JF646 (10 uM) Cells transfected with IR-TAG-GFP						Only GFP- cells were measured because GFP+ cell showed bright fluorescence at fluorescein channel
9-10-22, Exp Permeation 3_JK
	Original				Nomalization factor (3 points around 10 min)					Corrected
Time	Cell 1	Cell 2	Cell 3	Cell 4						Cell 1	Cell 2	Cell 3	Cell 4		Mean	SD	Number	SEM
0	1.805	1.214	0.803	0.876	71.625	63.892	29.375	35.12		0.0251989	0.0190014	0.0273315	0.0249431		0.0241187	0.00357563	4	0.00206439
0.166667	1.442	1.245	0.925	0.693						0.0201312	0.0194866	0.031484	0.0197323		0.0227085	0.00585633	4	0.00338115
0.333333	1.277	1.254	0.916	0.805						0.0178277	0.0196275	0.0311777	0.0229214		0.0228886	0.00591487	4	0.00341495
0.5	1.455	1.041	0.989	0.786						0.0203127	0.0162936	0.0336624	0.0223804		0.0231623	0.00744225	4	0.00429679
0.666667	1.565	1.064	0.765	0.722						0.0218484	0.0166536	0.0260381	0.0205581		0.0212746	0.00386813	4	0.00223326
0.833333	1.929	1.111	0.656	0.659						0.0269301	0.0173893	0.0223281	0.0187642		0.0213529	0.00426096	4	0.00246007
1	1.717	1.082	0.694	0.558						0.0239704	0.0169354	0.0236215	0.0158884		0.0201039	0.00428694	4	0.00247507
1.16667	1.625	1.292	0.905	0.705						0.022686	0.0202223	0.0308033	0.020074		0.0234464	0.00504875	4	0.0029149
1.33333	1.983	0.988	0.752	0.69						0.0276839	0.0154641	0.0255956	0.0196469		0.0220976	0.0055813	4	0.00322237
1.5	1.794	1.145	0.718	0.617						0.0250454	0.0179214	0.0244384	0.0175683		0.0212434	0.00404988	4	0.0023382
1.66667	1.32	1.151	0.765	0.616						0.018428	0.0180153	0.0260381	0.0175399		0.0200053	0.00403819	4	0.00233145
1.83333	1.42	0.907	0.65	0.588						0.0198241	0.0141963	0.0221239	0.0167426		0.0182217	0.00347307	4	0.00200518
2	2.301	2.469	3.213	2.029						0.0321234	0.0386445	0.10936	0.0577733		0.0594754	0.0349926	4	0.020203
2.16667	4.545	4.805	5.379	3.8						0.0634511	0.0752074	0.183084	0.1082		0.107486	0.0538408	4	0.031085
2.33333	7.895	7.793	7.373	5.504						0.110219	0.121975	0.250953	0.15672		0.159967	0.0637893	4	0.0368288
2.5	10.392	10.127	8.373	7.823						0.145079	0.158507	0.28499	0.222751		0.202832	0.0644122	4	0.0371884
2.66667	13.466	12.563	9.612	9.406						0.187994	0.196635	0.327161	0.267825		0.244904	0.0654734	4	0.0378011
2.83333	16.331	14.392	10.725	10.147						0.227991	0.225262	0.365044	0.288924		0.276805	0.0657584	4	0.0379656
3	18.515	15.916	12.399	10.972						0.258481	0.249116	0.422022	0.312415		0.310508	0.0794036	4	0.0458437
3.16667	20.397	18.215	12.335	12.75						0.284755	0.285099	0.419843	0.363041		0.338185	0.0657236	4	0.0379455
3.33333	22.47	19.421	13.188	13.574						0.313695	0.303976	0.448877	0.386503		0.363263	0.0679259	4	0.039217
3.5	24.546	21.655	15.69	14.406						0.342678	0.338942	0.534037	0.410194		0.406462	0.0911348	4	0.0526167
3.66667	27.736	22.443	16.603	14.713						0.387212	0.351276	0.565112	0.418935		0.430634	0.0938163	4	0.0541649
3.83333	28.643	24.724	18.543	16.474						0.399874	0.386978	0.631144	0.469077		0.471768	0.112199	4	0.0647782
4	30.791	25.819	18.237	17.138						0.429862	0.404116	0.620728	0.487984		0.485673	0.0966293	4	0.0557889
4.16667	33.501	27.687	20.486	17.777						0.467695	0.433354	0.697277	0.506179		0.526126	0.117914	4	0.0680779
4.33333	35.978	29.188	20.275	19.13						0.502276	0.456848	0.690095	0.544704		0.548481	0.100996	4	0.05831
4.5	36.216	31.636	20.322	20.254						0.505598	0.495164	0.691695	0.576708		0.567291	0.0905049	4	0.052253
4.66667	38.901	33.382	21.093	21.084						0.543083	0.522492	0.717937	0.600342		0.595963	0.0877331	4	0.0506527
4.83333	40.28	34.871	21.271	21.957						0.562334	0.545797	0.723996	0.625199		0.614332	0.0807156	4	0.0466012
5	42.924	36.694	21.217	22.755						0.599246	0.574331	0.722158	0.647921		0.635914	0.0651133	4	0.0375932
5.16667	45.486	39.237	22.965	24.081						0.635013	0.614134	0.781654	0.685678		0.67912	0.0746657	4	0.0431082
5.33333	49.196	41.415	23.705	24.684						0.686807	0.648224	0.806841	0.702847		0.71118	0.0677694	4	0.0391267
5.5	52.204	42.691	23.756	25.952						0.728801	0.668195	0.808577	0.738952		0.736131	0.0575193	4	0.0332088
5.66667	52.811	44.88	25.341	25.836						0.737275	0.702457	0.862526	0.735649		0.759477	0.0705477	4	0.0407307
5.83333	53.965	47.628	27.461	28.625						0.753385	0.745469	0.934683	0.815063		0.81215	0.087412	4	0.0504674
6	55.931	49.811	27.945	29.743						0.780832	0.779637	0.951157	0.846896		0.839631	0.0807207	4	0.0466041
6.16667	58.997	52.253	28.627	29.947						0.823635	0.817859	0.97437	0.852705		0.867142	0.0730935	4	0.0422006
6.33333	60.479	53.639	30.344	30.84						0.844325	0.839552	1.03281	0.878132		0.898705	0.0910385	4	0.0525611
6.5	63.224	55.203	29.592	31.628						0.882647	0.864032	1.00722	0.900569		0.913616	0.0641581	4	0.0370417
6.66667	66.717	58.762	30.288	33.488						0.931411	0.919737	1.03091	0.953531		0.958896	0.0500099	4	0.0288732
6.83333	69.678	62.372	30.016	34.645						0.972749	0.97624	1.02165	0.986475		0.989278	0.0223519	4	0.0129049
7	72.155	64.041	29.355	36.338						1.00733	1.00236	0.999149	1.03468		1.01088	0.0162198	4	0.00936451
7.16667	73.042	65.263	28.754	34.377						1.01971	1.02149	0.978693	0.978844		0.999685	0.0241631	4	0.0139506
7.33333	71.701	64.178	27.767	33.974						1.00099	1.00451	0.945099	0.967369		0.979492	0.0283894	4	0.0163906
7.5	69.189	62.933	25.916	32.597						0.965922	0.985021	0.882097	0.928161		0.9403	0.0454293	4	0.0262286
7.66667	67.11	60.214	23.796	30.904						0.936898	0.942464	0.809939	0.879954		0.892314	0.0617553	4	0.0356544
7.83333	64.549	60.675	24.492	29.205						0.901145	0.949679	0.833628	0.831577		0.879007	0.0571356	4	0.0329872
8	63.108	59.58	23.071	28.967						0.881028	0.93254	0.785262	0.824801		0.855908	0.0644516	4	0.0372111
8.16667	62.467	59.86	23.173	28.336						0.872079	0.936923	0.788734	0.806834		0.851142	0.0674653	4	0.0389511
8.33333	62.316	58.304	22.408	28.043						0.869971	0.912568	0.762696	0.798491		0.835931	0.0678164	4	0.0391538
8.5	58.743	57.113	21.528	27.011						0.820089	0.893927	0.732743	0.769106		0.803966	0.069859	4	0.0403331
8.66667	58.173	57.335	21.095	27.512						0.812132	0.897402	0.718005	0.783371		0.802728	0.0743957	4	0.0429524
8.83334	56.973	54.887	20.224	27.322						0.795379	0.859086	0.688359	0.777961		0.780196	0.0704583	4	0.0406791
9	53.462	55.965	20.397	26.299						0.746363	0.875959	0.694248	0.748833		0.766351	0.0772854	4	0.0446208
9.16667	54.44	54.74	19.084	25.284						0.760017	0.856785	0.649558	0.719932		0.746573	0.0865047	4	0.0499435
9.33334	53.952	52.081	18.989	25.881						0.753204	0.815167	0.646324	0.736931		0.737906	0.0697411	4	0.040265
9.5	52.089	53.102	18.326	25.581						0.727195	0.831147	0.623758	0.728388		0.727622	0.0846681	4	0.0488831
9.66667	50.796	51.968	17.965	25.124						0.709144	0.813398	0.61147	0.715376		0.712347	0.0824759	4	0.0476175
9.83334	50.166	50.975	18.12	24.73						0.700349	0.797856	0.616746	0.704157		0.704777	0.0740114	4	0.0427305
10	51.236	50.659	18.044	24.87						0.715287	0.79291	0.614159	0.708144		0.707625	0.0731854	4	0.0422536
10.1667	49.658	50.596	17.455	23.991						0.693257	0.791924	0.594112	0.683115		0.690602	0.0809106	4	0.0467137
10.3333	48.301	50.543	17.477	23.994						0.674312	0.791094	0.59486	0.6832		0.685867	0.0806134	4	0.0465422
10.5	49.342	50.28	15.947	23.285						0.688845	0.786978	0.542784	0.663013		0.670405	0.100451	4	0.0579952
10.6667	47.042	49.149	15.455	23.974						0.656736	0.769275	0.526038	0.682631		0.65867	0.100669	4	0.0581212
10.8333	46.354	48.472	15.113	24.236						0.647131	0.758679	0.514398	0.690091		0.652575	0.102937	4	0.0594308
11	46.043	48.267	15.157	23.476						0.642789	0.75547	0.515895	0.668451		0.645651	0.0990369	4	0.057179
11.1667	46.106	46.838	15.002	23.478						0.643669	0.733104	0.510619	0.668508		0.638975	0.0935051	4	0.0539852
11.3333	44.712	46.696	15.162	23.085						0.624208	0.730881	0.516065	0.657318		0.632118	0.0892935	4	0.0515536
11.5	45.629	47.724	14.195	23.46						0.63701	0.746971	0.483152	0.667995		0.633782	0.110578	4	0.063842
11.6667	45.42	47.623	14.424	23.309						0.634092	0.745391	0.490946	0.663696		0.633531	0.106071	4	0.0612402
11.8333	43.923	46.663	12.929	23.722						0.613193	0.730365	0.440061	0.675456		0.614769	0.125924	4	0.0727022
12	43.292	46.456	12.829	22.784						0.604384	0.727125	0.436658	0.648747		0.604228	0.122699	4	0.0708405
12.1667	42.469	47.185	13.404	21.403						0.592894	0.738535	0.456229	0.609425		0.599271	0.115469	4	0.0666661
