# Supplementary material for: Genetic code expansion, click chemistry, and light-activated PI3K reveal details of membrane protein trafficking downstream of receptor tyrosine kinases
Source: eLife. 2024 Aug 20;12:RP91012. doi: 10.7554/eLife.91012 (PMC11335347; doi:10.7554/eLife.91012)
Supplement: Figure 3—source data 3. [file elife-91012-fig3-data3.xlsx]

## Sheet: Sheet1
Time (min)	TRPV1_Average	TRPV1_SEM	InsR_Average	InsR_SEM
0	0.0586411	0.0145405	0.0688006	0.012353
0.5	0.0573938	0.0167283	0.0669343	0.0119008
1	0.0589895	0.0136215	0.0697756	0.0116434
1.5	0.0625885	0.0184235	0.0707606	0.0127748
2	0.0632606	0.0154797	0.0701099	0.0110508
2.5	0.0668355	0.0133177	0.0682133	0.0122566
3	0.0601244	0.0156254	0.0949345	0.0126759
3.5	0.100132	0.020683	0.150326	0.0167672
4	0.114886	0.0307148	0.191028	0.0173378
4.5	0.135809	0.0156368	0.230303	0.0182467
5	0.181488	0.0296668	0.26671	0.02193
5.5	0.216383	0.0300371	0.305347	0.0199028
6	0.247765	0.0285491	0.334727	0.0190903
6.5	0.282297	0.0431126	0.366708	0.0221416
7	0.306447	0.0404724	0.39883	0.0212438
7.5	0.333193	0.0404754	0.43034	0.0230002
8	0.365584	0.0424224	0.465789	0.0257152
8.5	0.411717	0.03844	0.485148	0.0260253
9	0.436799	0.036521	0.524872	0.0287557
9.5	0.454128	0.0364904	0.539678	0.0264256
10	0.499669	0.0456286	0.569205	0.0287201
10.5	0.511225	0.0458068	0.60047	0.0289682
11	0.545917	0.0423631	0.609122	0.0289113
11.5	0.556562	0.0447541	0.630306	0.0293293
12	0.578675	0.0421619	0.658589	0.0272537
12.5	0.596752	0.0533826	0.688337	0.0287151
13	0.633124	0.04986	0.691267	0.0293482
13.5	0.678907	0.0689906	0.719582	0.0289366
14	0.680488	0.0424871	0.732825	0.0278927
14.5	0.683522	0.0467458	0.748115	0.0243072
15	0.737887	0.0412545	0.773925	0.0252175
15.5	0.76554	0.0437823	0.791546	0.0246771
16	0.763361	0.0459907	0.812563	0.0230624
16.5	0.780736	0.046726	0.838426	0.0221375
17	0.828102	0.0503241	0.85142	0.0188389
17.5	0.832327	0.0382564	0.865691	0.0196906
18	0.841959	0.0319959	0.885228	0.0210612
18.5	0.854766	0.043358	0.904062	0.0128381
19	0.877812	0.0412883	0.91129	0.0132921
19.5	0.904105	0.0252091	0.922693	0.0137745
20	0.914868	0.0323421	0.931467	0.0103136
20.5	0.942523	0.0253422	0.946552	0.00869774
21	0.94689	0.0335263	0.971575	0.00914552
21.5	0.981993	0.0308182	0.978932	0.00902156
22	0.99354	0.00798472	0.994963	0.00433975
22.5	1.00672	0.00794038	1.00467	0.00436192
