# Supplementary material for: Genetic code expansion, click chemistry, and light-activated PI3K reveal details of membrane protein trafficking downstream of receptor tyrosine kinases
Source: eLife. 2024 Aug 20;12:RP91012. doi: 10.7554/eLife.91012 (PMC11335347; doi:10.7554/eLife.91012)
Supplement: Figure 4—source data 2. [file elife-91012-fig4-data2.xlsx]

## Sheet: Sheet1
100 ng/ml NGF					Vehicle
	GFP	Cy5			GFP	Cy5
Cell 1	1.51577	1.02027		Cell 1	0.967167	1.12771
Cell 2	1.28636	0.838663		Cell 2	0.989872	0.862383
Cell 3	1.89394	1.07613		Cell 3	0.91415	0.876265
Cell 4	1.19793	0.958222		Cell 4	0.84023	1.01436
Cell 5	1.32605	1.07379		Cell 5	1.15443	1.22451
Cell 6	1.47754	0.944675
Cell 7	1.36506	0.980154
Cell 8	1.40275	1.09857
Cell 9	1.49943	1.01276
Cell 10	1.41844	0.985185
Cell 11	1.4862	1.07184
Cell 12	1.4958	1.08145
Cell 13	1.4145	1.14884
Cell 14	1.30974	1.01341
Cell 15	1.43463	0.916296
Cell 16	1.54028	1.07093
Cell 17	1.45427	0.876828
Cell 18	1.00272	0.934451
Cell 19	1.59938	0.913523
Cell 20	0.883348	0.976663
Cell 21	1.37629	1.02733
Cell 22	1.19548	1.08634
Cell 23	1.41726	1.16259
Cell 24	1.40825	0.924467
