# Supplementary material for: Genetic code expansion, click chemistry, and light-activated PI3K reveal details of membrane protein trafficking downstream of receptor tyrosine kinases
Source: eLife. 2024 Aug 20;12:RP91012. doi: 10.7554/eLife.91012 (PMC11335347; doi:10.7554/eLife.91012)
Supplement: Figure 5—figure supplement 1—source data 2. [file elife-91012-fig5-figsupp1-data2.xlsx]

## Sheet: Sheet1
	Cy5_1	Cy5_2	Cy5_3	Cy5_4	Cy5_5	Cy5_6	Cy5_7	Cy5_8	Cy5_9	Cy5_10	Cy5_11
750_1	1	1	1	1	1	1	1	1	1	1	1
750_2	1.07129	1.18683	1.12963	1.087	1.07428	0.945485	1.03977	1.29723	1.06026	1.09809	1.23514
750_3	1.20674	1.26395	1.25351	1.12438	1.1439	0.853757	1.18674	1.41155	1.21075	1.26543	1.27184
	GFP_1	GFP_2	GFP_3	GFP_4	GFP_5	GFP_6	GFP_7	GFP_8	GFP_9	GFP_10	GFP_11
750_1	1	1	1	1	1	1	1	1	1	1	1
750_2	0.980676	0.834173	1.06522	0.990161	1.07272	0.980918	1.01657	1.0431	0.919136	0.975488	1.10891
750_3	0.96235	0.867629	0.989009	1.06153	1.13092	0.949623	1.0407	1.01967	0.933369	1.05684	1.12589
