# Supplementary material for: Genetic code expansion, click chemistry, and light-activated PI3K reveal details of membrane protein trafficking downstream of receptor tyrosine kinases
Source: eLife. 2024 Aug 20;12:RP91012. doi: 10.7554/eLife.91012 (PMC11335347; doi:10.7554/eLife.91012)
Supplement: Figure 5—figure supplement 1—source data 4. [file elife-91012-fig5-figsupp1-data4.xlsx]

## Sheet: Sheet1
	Cy5_1	Cy5_2	Cy5_3	Cy5_4	Cy5_5	Cy5_6	Cy5_7	Cy5_8	Cy5_9	Cy5_10
750_1	1	1	1	1	1	1	1	1	1	1
750_2	0.770347	1.3751	0.942291	1.36106	0.96028	1.14391	0.972278	1.08776	1.01791	0.909203
750_3	0.555124	1.52017	0.865535	1.58188	1.07925	1.20125	0.917452	1.072	1.09769	0.923462
	GFP_1	GFP_2	GFP_3	GFP_4	GFP_5	GFP_6	GFP_7	GFP_8	GFP_9	GFP_10
750_1	1	1	1	1	1	1	1	1	1	1
750_2	0.754648	1.10481	0.955104	1.16718	1.03126	0.950754	0.869502	1.10748	1.03425	0.898285
750_3	0.620383	1.26613	0.946536	1.25727	1.06335	0.976702	0.868013	0.977127	1.16927	0.924465
