# Supplementary material for: Genetic code expansion, click chemistry, and light-activated PI3K reveal details of membrane protein trafficking downstream of receptor tyrosine kinases
Source: eLife. 2024 Aug 20;12:RP91012. doi: 10.7554/eLife.91012 (PMC11335347; doi:10.7554/eLife.91012)
Supplement: Figure 5—source data 2. [file elife-91012-fig5-data2.xlsx]

## Sheet: Sheet1
	Cy5_1	Cy5_2	Cy5_3	Cy5_4	Cy5_5	Cy5_6	Cy5_7	Cy5_8	Cy5_9	Cy5_10	Cy5_11	Cy5_12	Cy5_13	Cy5_14	Cy5_15	Cy5_16	Cy5_17	Cy5_18	Cy5_19	Cy5_20
750_1	1	1	1	1	1	1	1	1	1	1	1	1	1	1	1	1	1	1	1	1
750_2	1.27298	1.28134	1.05699	1.21586	1.10782	1.01167	1.31292	1.15031	1.14417	1.15224	1.17436	1.07033	1.09105	1.08158	1.28957	1.28899	1.27967	0.974011	1.06792	1.00304
650_1	1.57186	1.65484	1.27586	1.44439	1.465	1.45759	1.31435	1.64373	1.67136	1.42974	1.65775	1.63475	1.28909	1.24784	1.37454	1.85305	1.54392	1.14449	1.47568	1.16059
	GFP_1	GFP_2	GFP_3	GFP_4	GFP_5	GFP_6	GFP_7	GFP_8	GFP_9	GFP_10	GFP_11	GFP_12	GFP_13	GFP_14	GFP_15	GFP_16	GFP_17	GFP_18	GFP_19	GFP_20
750_1	1	1	1	1	1	1	1	1	1	1	1	1	1	1	1	1	1	1	1	1
750_2	1.038	1.11018	1.01432	0.980018	0.90282	0.925175	1.13593	0.977823	0.964428	1.00015	1.08222	0.981592	1.21383	1.0845	1.00212	0.956493	1.12865	0.974011	0.919256	1.00304
650_1	0.985802	1.01996	1.01053	0.972521	0.833905	0.869605	0.989244	0.998223	1.07322	1.00015	1.10832	0.947647	1.32017	1.12885	1.00145	0.962922	1.18037	1.14449	1.03701	1.16059
