# Supplementary material for: Genetic code expansion, click chemistry, and light-activated PI3K reveal details of membrane protein trafficking downstream of receptor tyrosine kinases
Source: eLife. 2024 Aug 20;12:RP91012. doi: 10.7554/eLife.91012 (PMC11335347; doi:10.7554/eLife.91012)
Supplement: Figure 5—source data 4. [file elife-91012-fig5-data4.xlsx]

## Sheet: Sheet1
	Cy5_1	Cy5_2	Cy5_3	Cy5_4	Cy5_5	Cy5_6	Cy5_7	Cy5_8	Cy5_9	Cy5_10	Cy5_11	Cy5_12	Cy5_13	Cy5_14	Cy5_15	Cy5_16	Cy5_17	Cy5_18	Cy5_19	Cy5_20	Cy5_21	Cy5_22	Cy5_23	Cy5_24
750_1	1	1	1	1	1	1	1	1	1	1	1	1	1	1	1	1	1	1	1	1	1	1	1	1
750_2	0.861375	0.88023	1.1503	0.979621	0.931661	0.887479	1.01164	0.838246	0.768234	1.068	0.728351	0.69185	0.791344	0.996825	0.998242	1.07012	0.789164	0.935374	0.683997	0.898843	0.916942	0.989381	1.04753	1.29389
650_1	1.38094	1.16005	1.26915	1.29292	1.20358	1.15298	1.29251	1.15162	1.93411	0.990605	1.9886	0.932072	1.39184	1.77959	1.81542	1.07277	1.50455	1.53063	1.67577	1.63519	1.52546	1.11628	1.21422	1.04646
	GFP_1	GFP_2	GFP_3	GFP_4	GFP_5	GFP_6	GFP_7	GFP_8	GFP_9	GFP_10	GFP_11	GFP_12	GFP_13	GFP_14	GFP_15	GFP_16	GFP_17	GFP_18	GFP_19	GFP_20	GFP_21	GFP_22	GFP_23	GFP_24
750_1	1	1	1	1	1	1	1	1	1	1	1	1	1	1	1	1	1	1	1	1	1	1	1	1
750_2	0.960953	0.866951	0.98887	1.01142	1.12129	1.04621	1.14471	1.09545	0.998848	0.959733	0.936355	1.07003	1.1028	0.997737	1.00197	1.00213	1.15283	1.06121	0.947034	0.96005	1.09284	0.928695	1.1089	0.945107
650_1	0.88044	0.863622	0.981806	0.988428	0.972231	0.945157	0.97263	0.949826	1.02378	0.990888	0.973466	0.958518	1.01766	1.02052	0.972427	1.00254	0.975107	0.956072	1.15113	0.91638	0.990365	0.900901	1.09904	1.05236
